# Supplementary material for: Ruthenium-catalysed oxidative conversion of ammonia into dinitrogen
Source: Springer Nature journal article supplement (doi:10.1038/s41557-019-0293-y), 2019-07-24
Supplement: 41557_2019_293_MOESM27_ESM.cif [file 41557_2019_293_MOESM27_ESM.cif]

data_global
_audit_creation_date                               2018-08-03
_audit_creation_method                            'by CrystalStructure 4.3'
#==============================================================================
# SUBMISSION DETAILS
_publ_contact_author_name                         'Yoshiaki Nishibayashi'
_publ_contact_author_email                       'ynishiba@sys.t.u-tokyo.ac.jp'
_publ_contact_author_fax                          '+81-3-5841-1175'
_publ_contact_author_phone                        '+81-3-5841-1175'
_publ_contact_letter
;
  Department of Systems Innovation, School of Engineering,
  The University of Tokyo
;
_publ_requested_journal                           'Nature Chemistry'
_publ_requested_category                           CM
#==============================================================================
# TITLE AND AUTHOR LIST
_publ_section_title
;
  Ruthenium-catalyzed oxidative conversion of ammonia into dinitrogen
;
loop_
_publ_author_name
_publ_author_footnote
_publ_author_address
' Kazunari Nakajima '
;
  Frontier Research Center for Energy and Resources, School of Engineering,
  The University of Tokyo
;
;
  Bunkyo-ku, Tokyo 113-8656, Japan
;
' Hiroki Toda '
;
  Department of Systems Innovation, School of Engineering,
  The University of Tokyo
;
;
  Bunkyo-ku, Tokyo 113-8656, Japan
;
' Sakata Ken '
;
  Faculty of Pharmaceutical Sciences, 
  Toho University
;
;
  Miyama, Funabashi, Chiba 274-8510, Japan
;
' Yoshiaki Nishibayashi '
;
  Department of Systems Innovation, School of Engineering,
  The University of Tokyo
;
;
  Bunkyo-ku, Tokyo 113-8656, Japan
;
_publ_section_synopsis
;
Conversion of ammonia into dinitrogen has attracted broad scientific interests:
molecular models of heterogeneous nitrogen fixation process, environmental
treatment for denitrification, and utilization of ammonia as energy carrier.
Herein, we have found some ruthenium complexes bearing 2,2'-bipyridine-6,6'-
dicarboxylate ligand work as catalysts for ammonia oxidation reaction.
Production of dinitrogen is observed when ammonium salts are treated
with a triarylaminium radical as an oxidant and 2,4,6-collidine
as a base in the presence of the ruthenium catalysts.
Based on characterization of some intermediates, we propose a reaction pathway
via a bimetallic nitride-nitride coupling process.
The proposed reaction pathway is supported by DFT calculations.
We carried out investigation of the ammonia oxidation reaction
under the electrochemical conditions and revealed that the ruthenium complex
works as a new anode catalyst for ammonia oxidation.
;
#==============================================================================
# TEXT
_publ_section_references
;
    Rigaku (2018). CrystalStructure. Version 4.3. 
    Rigaku Corporation, Tokyo, Japan.

    Rigaku (2017). CrystalStructure. Version 4.2. 
    Rigaku Corporation, Tokyo, Japan.

    Sheldrick, G.M. (2014). SHELXT Version 2014/5.
    Acta Cryst. A70, C1437-C1437.

    Sheldrick, G.M. (2015). SHELXL Version 2016/6.
    Acta Cryst. C71, 3-8.

    Rigaku (1995). ABSCOR. 
    Rigaku Corporation, Tokyo, Japan.
;
#==============================================================================
data_7_H2O
#==============================================================================
# CHEMICAL DATA
_chemical_formula_sum                             'C24 H25 F6 N5 O5 P Ru'
_chemical_formula_moiety                          'C24 H25 F6 N5 O5 P Ru'
_chemical_formula_weight                           709.53
#==============================================================================
# CRYSTAL DATA
_space_group_crystal_system                        monoclinic
_space_group_name_H-M_alt                         'P 1 21/c 1'
_space_group_name_Hall                            '-P 2ybc'
_space_group_IT_number                             14
loop_
_space_group_symop_id
_space_group_symop_operation_xyz
1   '+X,+Y,+Z'
2   '-X,1/2+Y,1/2-Z'
3   '-X,-Y,-Z'
4   '+X,-1/2-Y,-1/2+Z'
#------------------------------------------------------------------------------
_cell_length_a                                     13.1919(5)
_cell_length_b                                     10.8888(4)
_cell_length_c                                     22.1324(9)
_cell_angle_alpha                                  90.0000
_cell_angle_beta                                   103.707(7)
_cell_angle_gamma                                  90.0000
_cell_volume                                       3088.6(2)
_cell_formula_units_Z                              4
_cell_measurement_reflns_used                      20759
_cell_measurement_theta_min                        1.90
_cell_measurement_theta_max                        27.48
_cell_measurement_temperature                      178
#------------------------------------------------------------------------------
_exptl_crystal_description                         platelet
_exptl_crystal_colour                              brown
_exptl_crystal_size_max                            0.300
_exptl_crystal_size_mid                            0.200
_exptl_crystal_size_min                            0.050
_exptl_crystal_density_diffrn                      1.526
_exptl_crystal_density_method                     'not measured'
_exptl_crystal_F_000                               1428.00
_exptl_absorpt_coefficient_mu                      0.636
_exptl_absorpt_correction_type                     multi-scan
_exptl_absorpt_process_details                    'ABSCOR (Rigaku, 1995)'
_exptl_absorpt_correction_T_min                    0.750
_exptl_absorpt_correction_T_max                    0.969
#==============================================================================
# EXPERIMENTAL DATA
_diffrn_ambient_temperature                        178
_diffrn_radiation_type                            'Mo K\a'
_diffrn_radiation_wavelength                       0.71075
_diffrn_measurement_device_type                   'Rigaku R-AXIS RAPID'
_diffrn_measurement_method                         \w
_diffrn_detector_area_resol_mean                   10.000
_diffrn_reflns_number                              29152
_diffrn_reflns_av_R_equivalents                    0.0734
_diffrn_reflns_theta_max                           27.482
_diffrn_reflns_theta_min                           2.454
_diffrn_reflns_theta_full                          25.242
_diffrn_measured_fraction_theta_max                0.998
_diffrn_measured_fraction_theta_full               0.998
_diffrn_reflns_Laue_measured_fraction_max          0.998
_diffrn_reflns_Laue_measured_fraction_full         0.998
_diffrn_reflns_point_group_measured_fraction_max   0.998
_diffrn_reflns_point_group_measured_fraction_full  0.998
_diffrn_reflns_limit_h_min                        -17
_diffrn_reflns_limit_h_max                         17
_diffrn_reflns_limit_k_min                        -14
_diffrn_reflns_limit_k_max                         14
_diffrn_reflns_limit_l_min                        -28
_diffrn_reflns_limit_l_max                         28
_diffrn_standards_number                           0
_diffrn_standards_interval_count                   .
_reflns_number_total                               7063
_reflns_number_gt                                  5321
_reflns_threshold_expression                       F^2^>2.0\s(F^2^)
_reflns_Friedel_coverage          0.000
_reflns_Friedel_fraction_max      .
_reflns_Friedel_fraction_full     .
#==============================================================================
# REFINEMENT DATA
_refine_special_details
;
    Refinement was performed using all reflections. The weighted 
    R-factor (wR) and goodness of fit (S) are based on F^2^.
    R-factor (gt) are based on F. The threshold expression of
    F^2^ > 2.0 sigma(F^2^) is used only for calculating R-factor (gt).
;
_refine_ls_structure_factor_coef                   Fsqd
_refine_ls_R_factor_all                            0.0834
_refine_ls_R_factor_gt                             0.0545
_refine_ls_wR_factor_ref                           0.1198
_refine_ls_wR_factor_gt                            0.1107
_refine_ls_number_restraints                       0
_refine_ls_hydrogen_treatment                      mixed
_refine_ls_number_reflns                           7063
_refine_ls_number_parameters                       399
_refine_ls_goodness_of_fit_ref                     1.040
_refine_ls_weighting_scheme                        calc
_refine_ls_weighting_details
           'w = 1/[\s^2^(Fo^2^)+(0.0532P)^2^+3.3090P] where P=(Fo^2^+2Fc^2^)/3'
_atom_sites_solution_hydrogens                     geom
_atom_sites_solution_primary                       direct
_atom_sites_solution_secondary                     difmap
_refine_ls_shift/su_max                            0.001
_refine_diff_density_max                           0.63
_refine_diff_density_min                          -0.78
_refine_ls_extinction_method                       none
loop_
_atom_type_symbol
_atom_type_description
_atom_type_scat_dispersion_real
_atom_type_scat_dispersion_imag
_atom_type_scat_source
  'C' 'C'  0.0033 0.0016 
;
International Tables for Crystallography
(Vol. C, Tables 4.2.6.8 and 6.1.1.4)
;
  'H' 'H'  0.0000 0.0000 
;
International Tables for Crystallography
(Vol. C, Table 6.1.1.4)
;
  'O' 'O'  0.0106 0.0060 
;
International Tables for Crystallography
(Vol. C, Tables 4.2.6.8 and 6.1.1.4)
;
  'N' 'N'  0.0061 0.0033 
;
International Tables for Crystallography
(Vol. C, Tables 4.2.6.8 and 6.1.1.4)
;
  'Ru' 'Ru'  -1.2594 0.8363 
;
International Tables for Crystallography
(Vol. C, Tables 4.2.6.8 and 6.1.1.4)
;
  'F' 'F'  0.0171 0.0103 
;
International Tables for Crystallography
(Vol. C, Tables 4.2.6.8 and 6.1.1.4)
;
  'P' 'P'  0.1023 0.0942 
;
International Tables for Crystallography
(Vol. C, Tables 4.2.6.8 and 6.1.1.4)
;
#==============================================================================
# ATOMIC COORDINATES AND THERMAL PARAMETERS
loop_
 _atom_site_label
 _atom_site_type_symbol
 _atom_site_fract_x
 _atom_site_fract_y
 _atom_site_fract_z
 _atom_site_U_iso_or_equiv
 _atom_site_adp_type
 _atom_site_occupancy
 _atom_site_site_symmetry_order  
 _atom_site_calc_flag
 _atom_site_refinement_flags_posn
 _atom_site_refinement_flags_adp
 _atom_site_refinement_flags_occupancy
 _atom_site_disorder_assembly
 _atom_site_disorder_group
Ru1 Ru 0.32429(2) 0.56204(3) 0.54858(2) 0.02318(10) Uani 1 1 d . . . . .
P1 P 0.08688(11) 0.56533(14) 0.18076(6) 0.0528(3) Uani 1 1 d . . . . .
F1 F 0.0130(5) 0.4530(4) 0.1718(2) 0.146(2) Uani 1 1 d . . . . .
F2 F -0.0037(3) 0.6503(4) 0.1863(3) 0.1310(18) Uani 1 1 d . . . . .
F3 F 0.0618(4) 0.5903(6) 0.10899(19) 0.159(2) Uani 1 1 d . . . . .
F4 F 0.1863(4) 0.4821(4) 0.1764(2) 0.1306(19) Uani 1 1 d . . . . .
F5 F 0.1168(3) 0.5403(3) 0.25259(14) 0.0769(10) Uani 1 1 d . . . . .
F6 F 0.1664(3) 0.6769(3) 0.18859(18) 0.0858(11) Uani 1 1 d . . . . .
O1 O 0.3670(2) 0.5877(2) 0.46268(12) 0.0295(6) Uani 1 1 d . . . . .
O2 O 0.3071(2) 0.6830(3) 0.37159(13) 0.0373(7) Uani 1 1 d . . . . .
O3 O 0.4063(3) 0.4100(3) 0.70876(15) 0.0498(8) Uani 1 1 d . . . . .
O4 O 0.4202(3) 0.6132(3) 0.72371(16) 0.0549(9) Uani 1 1 d . . . . .
O5 O 0.3794(3) 0.6547(4) 0.26452(18) 0.0653(11) Uani 1 1 d . . . . .
N1 N 0.4707(3) 0.4869(4) 0.59803(18) 0.0315(8) Uani 1 1 d . . . . .
N2 N 0.1954(2) 0.6285(3) 0.49808(15) 0.0247(7) Uani 1 1 d . . . . .
N3 N 0.2327(2) 0.5638(3) 0.61347(14) 0.0268(6) Uani 1 1 d . . . . .
N4 N 0.3875(2) 0.7354(3) 0.57144(14) 0.0273(7) Uani 1 1 d . . . . .
N5 N 0.2744(2) 0.3815(3) 0.52418(15) 0.0290(7) Uani 1 1 d . . . . .
C1 C 0.2960(3) 0.6453(4) 0.42175(18) 0.0283(8) Uani 1 1 d . . . . .
C2 C 0.1932(3) 0.6642(3) 0.43937(18) 0.0269(8) Uani 1 1 d . . . . .
C3 C 0.1039(3) 0.7116(4) 0.4017(2) 0.0341(9) Uani 1 1 d . . . . .
H3 H 0.102695 0.737590 0.360523 0.041 Uiso 1 1 calc R U . . .
C4 C 0.0153(3) 0.7205(4) 0.4250(2) 0.0410(11) Uani 1 1 d . . . . .
H4 H -0.047309 0.753029 0.399635 0.049 Uiso 1 1 calc R U . . .
C5 C 0.0178(3) 0.6823(4) 0.4851(2) 0.0359(10) Uani 1 1 d . . . . .
H5 H -0.042894 0.688051 0.500999 0.043 Uiso 1 1 calc R U . . .
C6 C 0.1099(3) 0.6355(3) 0.52166(18) 0.0270(8) Uani 1 1 d . . . . .
C7 C 0.1301(3) 0.5929(3) 0.58648(18) 0.0284(8) Uani 1 1 d . . . . .
C8 C 0.0534(3) 0.5849(4) 0.6194(2) 0.0380(10) Uani 1 1 d . . . . .
H8 H -0.016735 0.605307 0.599861 0.046 Uiso 1 1 calc R U . . .
C9 C 0.0785(4) 0.5474(4) 0.6807(2) 0.0468(12) Uani 1 1 d . . . . .
H9 H 0.026115 0.537766 0.703256 0.056 Uiso 1 1 calc R U . . .
C10 C 0.1815(4) 0.5243(4) 0.7082(2) 0.0414(11) Uani 1 1 d . . . . .
H10 H 0.201297 0.501618 0.750817 0.050 Uiso 1 1 calc R U . . .
C11 C 0.2569(3) 0.5339(3) 0.67399(18) 0.0303(9) Uani 1 1 d . . . . .
C12 C 0.3712(3) 0.5173(5) 0.70499(18) 0.0372(10) Uani 1 1 d . . . . .
C13 C 0.2488(3) 0.3435(4) 0.46455(19) 0.0344(9) Uani 1 1 d . . . . .
H13 H 0.254080 0.400441 0.432904 0.041 Uiso 1 1 calc R U . . .
C14 C 0.2155(3) 0.2260(4) 0.4473(2) 0.0409(10) Uani 1 1 d . . . . .
H14 H 0.197390 0.204359 0.404554 0.049 Uiso 1 1 calc R U . . .
C15 C 0.2080(3) 0.1394(4) 0.4917(2) 0.0408(11) Uani 1 1 d . . . . .
C16 C 0.1733(4) 0.0104(5) 0.4748(3) 0.0648(16) Uani 1 1 d . . . . .
H16A H 0.173295 -0.036103 0.512673 0.078 Uiso 1 1 calc R U . . .
H16B H 0.102648 0.011347 0.447834 0.078 Uiso 1 1 calc R U . . .
H16C H 0.221130 -0.028345 0.452747 0.078 Uiso 1 1 calc R U . . .
C17 C 0.2341(3) 0.1787(4) 0.5529(2) 0.0397(10) Uani 1 1 d . . . . .
H17 H 0.229848 0.123036 0.585265 0.048 Uiso 1 1 calc R U . . .
C18 C 0.2661(3) 0.2975(4) 0.5673(2) 0.0339(9) Uani 1 1 d . . . . .
H18 H 0.283046 0.321487 0.609784 0.041 Uiso 1 1 calc R U . . .
C19 C 0.3476(3) 0.8201(4) 0.60365(17) 0.0305(9) Uani 1 1 d . . . . .
H19 H 0.285946 0.800423 0.616660 0.037 Uiso 1 1 calc R U . . .
C20 C 0.3916(3) 0.9328(4) 0.61851(19) 0.0368(9) Uani 1 1 d . . . . .
H20 H 0.360255 0.988769 0.641563 0.044 Uiso 1 1 calc R U . . .
C21 C 0.4819(4) 0.9672(4) 0.60036(19) 0.0383(10) Uani 1 1 d . . . . .
C22 C 0.5313(4) 1.0912(4) 0.6151(3) 0.0587(14) Uani 1 1 d . . . . .
H22A H 0.490977 1.139184 0.638718 0.070 Uiso 1 1 calc R U . . .
H22B H 0.602916 1.081261 0.639880 0.070 Uiso 1 1 calc R U . . .
H22C H 0.532117 1.134149 0.576303 0.070 Uiso 1 1 calc R U . . .
C23 C 0.5231(3) 0.8801(4) 0.5671(2) 0.0431(11) Uani 1 1 d . . . . .
H23 H 0.584199 0.898176 0.553073 0.052 Uiso 1 1 calc R U . . .
C24 C 0.4755(3) 0.7674(4) 0.55445(19) 0.0364(10) Uani 1 1 d . . . . .
H24 H 0.506360 0.708825 0.532498 0.044 Uiso 1 1 calc R U . . .
H1A H 0.458(3) 0.419(4) 0.619(2) 0.035(13) Uiso 1 1 d . . . . .
H1B H 0.510(3) 0.459(4) 0.573(2) 0.038(12) Uiso 1 1 d . . . . .
H1C H 0.502(4) 0.531(4) 0.623(2) 0.038(15) Uiso 1 1 d . . . . .
H5A H 0.350(4) 0.667(5) 0.303(3) 0.076(17) Uiso 1 1 d . . . . .
H5B H 0.321(5) 0.612(6) 0.242(3) 0.10(2) Uiso 1 1 d . . . . .
loop_
 _atom_site_aniso_label
 _atom_site_aniso_U_11
 _atom_site_aniso_U_22
 _atom_site_aniso_U_33
 _atom_site_aniso_U_23
 _atom_site_aniso_U_13
 _atom_site_aniso_U_12
Ru1 0.01847(14) 0.02841(16) 0.02402(15) -0.00083(14) 0.00773(10) 0.00205(14)
P1 0.0530(8) 0.0619(8) 0.0443(7) -0.0002(7) 0.0131(6) -0.0145(7)
F1 0.199(5) 0.118(4) 0.103(4) -0.010(3) -0.003(3) -0.106(4)
F2 0.062(2) 0.136(4) 0.206(5) 0.035(4) 0.054(3) 0.032(3)
F3 0.161(5) 0.252(7) 0.049(2) 0.034(3) -0.008(3) -0.083(5)
F4 0.182(5) 0.113(3) 0.131(4) 0.010(3) 0.106(4) 0.052(3)
F5 0.070(2) 0.117(3) 0.0485(18) 0.0002(19) 0.0238(16) -0.015(2)
F6 0.058(2) 0.090(3) 0.106(3) 0.024(2) 0.0134(19) -0.0240(19)
O1 0.0249(13) 0.0388(16) 0.0262(14) 0.0006(11) 0.0091(11) 0.0030(12)
O2 0.0364(15) 0.0477(17) 0.0306(15) 0.0034(13) 0.0134(13) -0.0001(14)
O3 0.0473(19) 0.057(2) 0.047(2) 0.0158(16) 0.0160(16) 0.0156(16)
O4 0.0440(19) 0.073(2) 0.048(2) -0.0192(18) 0.0101(16) -0.0087(18)
O5 0.065(3) 0.090(3) 0.038(2) -0.001(2) 0.0088(19) 0.007(2)
N1 0.0253(18) 0.045(2) 0.0252(19) 0.0004(18) 0.0069(16) 0.0080(17)
N2 0.0184(14) 0.0236(16) 0.0319(17) -0.0012(13) 0.0053(13) -0.0004(13)
N3 0.0234(15) 0.0282(16) 0.0317(17) -0.0015(15) 0.0124(13) 0.0004(15)
N4 0.0243(16) 0.0326(17) 0.0251(16) 0.0010(14) 0.0059(13) -0.0008(14)
N5 0.0228(16) 0.0311(17) 0.0342(18) -0.0028(14) 0.0093(14) 0.0023(14)
C1 0.0277(19) 0.030(2) 0.027(2) -0.0041(16) 0.0063(16) -0.0070(17)
C2 0.0253(18) 0.0241(19) 0.031(2) 0.0010(15) 0.0056(15) 0.0013(16)
C3 0.029(2) 0.032(2) 0.039(2) 0.0035(18) 0.0029(18) 0.0007(18)
C4 0.025(2) 0.043(3) 0.052(3) 0.009(2) 0.0020(19) 0.0116(19)
C5 0.0218(19) 0.036(2) 0.052(3) 0.003(2) 0.0138(18) 0.0037(18)
C6 0.0218(18) 0.0238(19) 0.038(2) -0.0027(16) 0.0119(16) -0.0028(15)
C7 0.0249(18) 0.027(2) 0.036(2) -0.0011(16) 0.0125(17) -0.0015(16)
C8 0.028(2) 0.038(3) 0.053(3) 0.002(2) 0.019(2) 0.0007(18)
C9 0.041(2) 0.057(3) 0.053(3) 0.007(2) 0.033(2) 0.002(2)
C10 0.049(3) 0.048(3) 0.034(2) 0.0065(19) 0.022(2) 0.000(2)
C11 0.032(2) 0.030(2) 0.032(2) 0.0003(16) 0.0151(17) -0.0001(17)
C12 0.035(2) 0.057(3) 0.022(2) 0.0009(19) 0.0118(18) 0.002(2)
C13 0.032(2) 0.035(2) 0.036(2) 0.0007(18) 0.0099(18) 0.0023(18)
C14 0.035(2) 0.040(2) 0.044(3) -0.010(2) 0.003(2) -0.003(2)
C15 0.028(2) 0.027(2) 0.065(3) -0.004(2) 0.005(2) 0.0013(18)
C16 0.066(4) 0.034(3) 0.081(4) 0.000(3) -0.009(3) -0.004(3)
C17 0.034(2) 0.030(2) 0.054(3) 0.011(2) 0.009(2) 0.0060(19)
C18 0.029(2) 0.033(2) 0.041(2) 0.0044(18) 0.0090(18) 0.0092(18)
C19 0.032(2) 0.035(2) 0.026(2) 0.0053(17) 0.0076(16) 0.0024(18)
C20 0.047(2) 0.031(2) 0.032(2) 0.0015(19) 0.0083(19) 0.002(2)
C21 0.046(2) 0.038(2) 0.027(2) 0.0011(17) 0.0002(19) -0.011(2)
C22 0.071(4) 0.048(3) 0.053(3) 0.000(2) 0.007(3) -0.023(3)
C23 0.031(2) 0.053(3) 0.046(3) -0.001(2) 0.013(2) -0.015(2)
C24 0.030(2) 0.046(2) 0.037(2) -0.0049(19) 0.0145(18) -0.0039(19)
#==============================================================================
_computing_data_collection                        'RAPID AUTO (Rigaku, 2018)'
_computing_cell_refinement                        'RAPID AUTO'
_computing_data_reduction                         'RAPID AUTO'
_computing_structure_solution
                                      'SHELXT Version 2014/5 (Sheldrick, 2014)'
_computing_structure_refinement
                                      'SHELXL Version 2016/6 (Sheldrick, 2015)'
_computing_publication_material
                                        'CrystalStructure 4.2.5 (Rigaku, 2017)'
_computing_molecular_graphics                     'CrystalStructure 4.2.5'
#==============================================================================
# MOLECULAR GEOMETRY
_geom_special_details
;
 All esds (except the esd in the dihedral angle between two l.s. planes)
 are estimated using the full covariance matrix.  The cell esds are taken
 into account individually in the estimation of esds in distances, angles
 and torsion angles; correlations between esds in cell parameters are only
 used when they are defined by crystal symmetry.  An approximate (isotropic)
 treatment of cell esds is used for estimating esds involving l.s. planes.
;
loop_
 _geom_bond_atom_site_label_1
 _geom_bond_atom_site_label_2
 _geom_bond_distance
 _geom_bond_site_symmetry_2
 _geom_bond_publ_flag
Ru1 N2 1.940(3) . ?
Ru1 N4 2.077(3) . ?
Ru1 N3 2.085(3) . ?
Ru1 N5 2.103(3) . ?
Ru1 O1 2.125(2) . ?
Ru1 N1 2.144(3) . ?
P1 F2 1.539(4) . ?
P1 F1 1.547(4) . ?
P1 F3 1.568(4) . ?
P1 F5 1.568(3) . ?
P1 F6 1.587(4) . ?
P1 F4 1.615(5) . ?
O1 C1 1.300(5) . ?
O2 C1 1.224(4) . ?
O3 C12 1.253(5) . ?
O4 C12 1.246(5) . ?
O5 H5A 1.03(6) . ?
O5 H5B 0.94(7) . ?
N1 H1A 0.91(4) . ?
N1 H1B 0.90(5) . ?
N1 H1C 0.77(5) . ?
N2 C2 1.350(5) . ?
N2 C6 1.353(4) . ?
N3 C11 1.341(5) . ?
N3 C7 1.380(5) . ?
N4 C19 1.346(5) . ?
N4 C24 1.348(5) . ?
N5 C18 1.345(5) . ?
N5 C13 1.347(5) . ?
C1 C2 1.511(5) . ?
C2 C3 1.373(5) . ?
C3 C4 1.388(6) . ?
C3 H3 0.9500 . ?
C4 C5 1.387(6) . ?
C4 H4 0.9500 . ?
C5 C6 1.387(5) . ?
C5 H5 0.9500 . ?
C6 C7 1.471(5) . ?
C7 C8 1.384(5) . ?
C8 C9 1.379(6) . ?
C8 H8 0.9500 . ?
C9 C10 1.374(6) . ?
C9 H9 0.9500 . ?
C10 C11 1.389(5) . ?
C10 H10 0.9500 . ?
C11 C12 1.512(6) . ?
C13 C14 1.377(6) . ?
C13 H13 0.9500 . ?
C14 C15 1.381(6) . ?
C14 H14 0.9500 . ?
C15 C17 1.385(6) . ?
C15 C16 1.497(6) . ?
C16 H16A 0.9800 . ?
C16 H16B 0.9800 . ?
C16 H16C 0.9800 . ?
C17 C18 1.374(6) . ?
C17 H17 0.9500 . ?
C18 H18 0.9500 . ?
C19 C20 1.364(6) . ?
C19 H19 0.9500 . ?
C20 C21 1.396(6) . ?
C20 H20 0.9500 . ?
C21 C23 1.388(6) . ?
C21 C22 1.501(6) . ?
C22 H22A 0.9800 . ?
C22 H22B 0.9800 . ?
C22 H22C 0.9800 . ?
C23 C24 1.377(6) . ?
C23 H23 0.9500 . ?
C24 H24 0.9500 . ?
loop_
 _geom_angle_atom_site_label_1
 _geom_angle_atom_site_label_2
 _geom_angle_atom_site_label_3
 _geom_angle
 _geom_angle_site_symmetry_1
 _geom_angle_site_symmetry_3
 _geom_angle_publ_flag
N2 Ru1 N4 92.72(12) . . ?
N2 Ru1 N3 79.72(12) . . ?
N4 Ru1 N3 95.08(12) . . ?
N2 Ru1 N5 91.31(12) . . ?
N4 Ru1 N5 174.50(12) . . ?
N3 Ru1 N5 89.32(12) . . ?
N2 Ru1 O1 79.47(11) . . ?
N4 Ru1 O1 85.55(11) . . ?
N3 Ru1 O1 159.19(11) . . ?
N5 Ru1 O1 91.50(11) . . ?
N2 Ru1 N1 175.65(13) . . ?
N4 Ru1 N1 87.79(15) . . ?
N3 Ru1 N1 104.54(13) . . ?
N5 Ru1 N1 87.92(15) . . ?
O1 Ru1 N1 96.27(12) . . ?
F2 P1 F1 90.5(3) . . ?
F2 P1 F3 89.8(3) . . ?
F1 P1 F3 91.8(3) . . ?
F2 P1 F5 92.1(3) . . ?
F1 P1 F5 89.6(2) . . ?
F3 P1 F5 177.7(3) . . ?
F2 P1 F6 92.1(2) . . ?
F1 P1 F6 177.3(3) . . ?
F3 P1 F6 87.3(2) . . ?
F5 P1 F6 91.2(2) . . ?
F2 P1 F4 176.9(3) . . ?
F1 P1 F4 92.5(3) . . ?
F3 P1 F4 90.9(3) . . ?
F5 P1 F4 87.1(2) . . ?
F6 P1 F4 84.9(3) . . ?
C1 O1 Ru1 112.8(2) . . ?
H5A O5 H5B 95(5) . . ?
Ru1 N1 H1A 109(3) . . ?
Ru1 N1 H1B 113(3) . . ?
H1A N1 H1B 104(4) . . ?
Ru1 N1 H1C 114(3) . . ?
H1A N1 H1C 106(4) . . ?
H1B N1 H1C 111(4) . . ?
C2 N2 C6 121.6(3) . . ?
C2 N2 Ru1 118.6(2) . . ?
C6 N2 Ru1 119.7(3) . . ?
C11 N3 C7 117.7(3) . . ?
C11 N3 Ru1 130.2(3) . . ?
C7 N3 Ru1 111.9(2) . . ?
C19 N4 C24 116.2(3) . . ?
C19 N4 Ru1 124.6(3) . . ?
C24 N4 Ru1 119.3(3) . . ?
C18 N5 C13 116.3(3) . . ?
C18 N5 Ru1 121.8(3) . . ?
C13 N5 Ru1 121.9(3) . . ?
O2 C1 O1 124.9(4) . . ?
O2 C1 C2 119.7(4) . . ?
O1 C1 C2 115.4(3) . . ?
N2 C2 C3 120.9(4) . . ?
N2 C2 C1 113.1(3) . . ?
C3 C2 C1 126.0(4) . . ?
C2 C3 C4 118.5(4) . . ?
C2 C3 H3 120.8 . . ?
C4 C3 H3 120.8 . . ?
C5 C4 C3 120.3(4) . . ?
C5 C4 H4 119.8 . . ?
C3 C4 H4 119.8 . . ?
C4 C5 C6 119.2(4) . . ?
C4 C5 H5 120.4 . . ?
C6 C5 H5 120.4 . . ?
N2 C6 C5 119.4(4) . . ?
N2 C6 C7 112.5(3) . . ?
C5 C6 C7 128.1(3) . . ?
N3 C7 C8 121.5(4) . . ?
N3 C7 C6 115.3(3) . . ?
C8 C7 C6 123.2(4) . . ?
C9 C8 C7 120.1(4) . . ?
C9 C8 H8 120.0 . . ?
C7 C8 H8 120.0 . . ?
C10 C9 C8 118.2(4) . . ?
C10 C9 H9 120.9 . . ?
C8 C9 H9 120.9 . . ?
C9 C10 C11 120.3(4) . . ?
C9 C10 H10 119.8 . . ?
C11 C10 H10 119.8 . . ?
N3 C11 C10 122.0(4) . . ?
N3 C11 C12 117.3(3) . . ?
C10 C11 C12 120.6(4) . . ?
O4 C12 O3 127.2(4) . . ?
O4 C12 C11 115.7(4) . . ?
O3 C12 C11 117.1(4) . . ?
N5 C13 C14 123.1(4) . . ?
N5 C13 H13 118.5 . . ?
C14 C13 H13 118.5 . . ?
C13 C14 C15 120.7(4) . . ?
C13 C14 H14 119.7 . . ?
C15 C14 H14 119.7 . . ?
C14 C15 C17 116.2(4) . . ?
C14 C15 C16 122.2(5) . . ?
C17 C15 C16 121.7(5) . . ?
C15 C16 H16A 109.5 . . ?
C15 C16 H16B 109.5 . . ?
H16A C16 H16B 109.5 . . ?
C15 C16 H16C 109.5 . . ?
H16A C16 H16C 109.5 . . ?
H16B C16 H16C 109.5 . . ?
C18 C17 C15 120.6(4) . . ?
C18 C17 H17 119.7 . . ?
C15 C17 H17 119.7 . . ?
N5 C18 C17 123.2(4) . . ?
N5 C18 H18 118.4 . . ?
C17 C18 H18 118.4 . . ?
N4 C19 C20 123.2(4) . . ?
N4 C19 H19 118.4 . . ?
C20 C19 H19 118.4 . . ?
C19 C20 C21 121.0(4) . . ?
C19 C20 H20 119.5 . . ?
C21 C20 H20 119.5 . . ?
C23 C21 C20 116.0(4) . . ?
C23 C21 C22 121.7(4) . . ?
C20 C21 C22 122.3(4) . . ?
C21 C22 H22A 109.5 . . ?
C21 C22 H22B 109.5 . . ?
H22A C22 H22B 109.5 . . ?
C21 C22 H22C 109.5 . . ?
H22A C22 H22C 109.5 . . ?
H22B C22 H22C 109.5 . . ?
C24 C23 C21 120.0(4) . . ?
C24 C23 H23 120.0 . . ?
C21 C23 H23 120.0 . . ?
N4 C24 C23 123.7(4) . . ?
N4 C24 H24 118.1 . . ?
C23 C24 H24 118.1 . . ?
loop_
 _geom_torsion_atom_site_label_1
 _geom_torsion_atom_site_label_2
 _geom_torsion_atom_site_label_3
 _geom_torsion_atom_site_label_4
 _geom_torsion
 _geom_torsion_site_symmetry_1
 _geom_torsion_site_symmetry_2
 _geom_torsion_site_symmetry_3
 _geom_torsion_site_symmetry_4
 _geom_torsion_publ_flag
Ru1 O1 C1 O2 171.4(3) . . . . ?
Ru1 O1 C1 C2 -9.1(4) . . . . ?
C6 N2 C2 C3 1.3(6) . . . . ?
Ru1 N2 C2 C3 179.8(3) . . . . ?
C6 N2 C2 C1 -178.3(3) . . . . ?
Ru1 N2 C2 C1 0.2(4) . . . . ?
O2 C1 C2 N2 -174.2(3) . . . . ?
O1 C1 C2 N2 6.3(5) . . . . ?
O2 C1 C2 C3 6.2(6) . . . . ?
O1 C1 C2 C3 -173.3(4) . . . . ?
N2 C2 C3 C4 -0.8(6) . . . . ?
C1 C2 C3 C4 178.8(4) . . . . ?
C2 C3 C4 C5 0.0(6) . . . . ?
C3 C4 C5 C6 0.3(7) . . . . ?
C2 N2 C6 C5 -1.0(5) . . . . ?
Ru1 N2 C6 C5 -179.5(3) . . . . ?
C2 N2 C6 C7 -179.5(3) . . . . ?
Ru1 N2 C6 C7 2.0(4) . . . . ?
C4 C5 C6 N2 0.2(6) . . . . ?
C4 C5 C6 C7 178.4(4) . . . . ?
C11 N3 C7 C8 -3.7(5) . . . . ?
Ru1 N3 C7 C8 172.2(3) . . . . ?
C11 N3 C7 C6 174.7(3) . . . . ?
Ru1 N3 C7 C6 -9.5(4) . . . . ?
N2 C6 C7 N3 5.4(5) . . . . ?
C5 C6 C7 N3 -173.0(4) . . . . ?
N2 C6 C7 C8 -176.3(4) . . . . ?
C5 C6 C7 C8 5.3(6) . . . . ?
N3 C7 C8 C9 0.1(6) . . . . ?
C6 C7 C8 C9 -178.2(4) . . . . ?
C7 C8 C9 C10 3.0(7) . . . . ?
C8 C9 C10 C11 -2.6(7) . . . . ?
C7 N3 C11 C10 4.1(6) . . . . ?
Ru1 N3 C11 C10 -170.8(3) . . . . ?
C7 N3 C11 C12 -172.7(4) . . . . ?
Ru1 N3 C11 C12 12.4(5) . . . . ?
C9 C10 C11 N3 -1.0(7) . . . . ?
C9 C10 C11 C12 175.7(4) . . . . ?
N3 C11 C12 O4 83.7(5) . . . . ?
C10 C11 C12 O4 -93.2(5) . . . . ?
N3 C11 C12 O3 -95.9(5) . . . . ?
C10 C11 C12 O3 87.2(5) . . . . ?
C18 N5 C13 C14 0.2(6) . . . . ?
Ru1 N5 C13 C14 -179.6(3) . . . . ?
N5 C13 C14 C15 -0.9(7) . . . . ?
C13 C14 C15 C17 1.1(6) . . . . ?
C13 C14 C15 C16 -179.3(4) . . . . ?
C14 C15 C17 C18 -0.5(6) . . . . ?
C16 C15 C17 C18 179.8(4) . . . . ?
C13 N5 C18 C17 0.4(5) . . . . ?
Ru1 N5 C18 C17 -179.8(3) . . . . ?
C15 C17 C18 N5 -0.3(6) . . . . ?
C24 N4 C19 C20 0.5(6) . . . . ?
Ru1 N4 C19 C20 179.3(3) . . . . ?
N4 C19 C20 C21 0.4(6) . . . . ?
C19 C20 C21 C23 -0.3(6) . . . . ?
C19 C20 C21 C22 179.0(4) . . . . ?
C20 C21 C23 C24 -0.6(6) . . . . ?
C22 C21 C23 C24 -179.9(4) . . . . ?
C19 N4 C24 C23 -1.4(6) . . . . ?
Ru1 N4 C24 C23 179.7(3) . . . . ?
C21 C23 C24 N4 1.5(7) . . . . ?
#==============================================================================
loop_
_geom_hbond_atom_site_label_D
_geom_hbond_atom_site_label_H
_geom_hbond_atom_site_label_A
_geom_hbond_site_symmetry_D
_geom_hbond_site_symmetry_H
_geom_hbond_site_symmetry_A
_geom_hbond_distance_DA
_geom_hbond_distance_DH
_geom_hbond_distance_HA
_geom_hbond_angle_DHA
_geom_hbond_publ_flag
O(5) H(5A) O(2) . . . 2.773(5) 1.03(7) 1.74(7) 176(5) no
O(5) H(5B) F(6) . . . 2.922(5) 0.94(6) 2.22(6) 131(5) no
N(1) H(1A) O(3) . . . 2.901(6) 0.91(5) 2.26(5) 128(4) no
N(1) H(1B) O(1) . . 3_666 2.901(5) 0.90(5) 2.02(5) 163(4) no
#==============================================================================
# Additional structures and associated data_7_H2O identifiers
# should be added at this point if there is more than one 
# structure analysis in the CIF.
_shelx_res_file
;
TITL 20171211-Ru3NH3
    shelxl.res
    created by SHELXL-2016/6 at 11:34:56 on 30-May-2018
CELL  0.71075 13.19190 10.88883 22.13236 90.00000 103.70700 90.00000
ZERR  4 0.00047 0.00043 0.00093 0.00000 0.00730 0.00000
LATT 1
SYMM    -X, .50+Y, .50-Z
SFAC C H O N RU F P
UNIT 96 100 20 20 4 24 4
OMIT     -8   6   4
OMIT    -10   7   4
OMIT     -5   9   4
OMIT     -5  10   3
OMIT    -11   5   5
L.S. 20
FMAP 2
PLAN 10
WPDB -2
HTAB
BOND $H
CONF
LIST 4
TEMP -95.0
ACTA
SIZE 0.300 0.200 0.050
ABIN
WGHT    0.053200    3.309000
FVAR       0.24787
RU1   5    0.324292    0.562037    0.548577    11.00000    0.01847    0.02841 =
         0.02402   -0.00083    0.00773    0.00205
P1    7    0.086876    0.565327    0.180763    11.00000    0.05296    0.06192 =
         0.04426   -0.00015    0.01313   -0.01450
F1    6    0.013010    0.453012    0.171754    11.00000    0.19859    0.11755 =
         0.10302   -0.00993   -0.00314   -0.10640
F2    6   -0.003657    0.650301    0.186331    11.00000    0.06233    0.13556 =
         0.20634    0.03516    0.05417    0.03211
F3    6    0.061830    0.590295    0.108989    11.00000    0.16069    0.25195 =
         0.04912    0.03416   -0.00819   -0.08310
F4    6    0.186254    0.482103    0.176408    11.00000    0.18194    0.11312 =
         0.13120    0.01023    0.10553    0.05182
F5    6    0.116794    0.540315    0.252587    11.00000    0.07020    0.11697 =
         0.04851    0.00021    0.02380   -0.01492
F6    6    0.166360    0.676890    0.188595    11.00000    0.05842    0.08958 =
         0.10644    0.02385    0.01336   -0.02402
O1    3    0.366957    0.587694    0.462684    11.00000    0.02487    0.03881 =
         0.02619    0.00056    0.00907    0.00296
O2    3    0.307052    0.682969    0.371589    11.00000    0.03640    0.04775 =
         0.03059    0.00345    0.01336   -0.00013
O3    3    0.406347    0.409999    0.708763    11.00000    0.04732    0.05746 =
         0.04701    0.01583    0.01602    0.01562
O4    3    0.420185    0.613182    0.723708    11.00000    0.04398    0.07256 =
         0.04763   -0.01924    0.01008   -0.00870
O5    3    0.379364    0.654730    0.264518    11.00000    0.06546    0.09037 =
         0.03834   -0.00062    0.00877    0.00650
N1    4    0.470742    0.486947    0.598031    11.00000    0.02530    0.04453 =
         0.02517    0.00038    0.00686    0.00797
N2    4    0.195438    0.628500    0.498081    11.00000    0.01839    0.02360 =
         0.03186   -0.00122    0.00534   -0.00039
N3    4    0.232671    0.563754    0.613468    11.00000    0.02343    0.02823 =
         0.03169   -0.00145    0.01245    0.00042
N4    4    0.387453    0.735438    0.571436    11.00000    0.02428    0.03258 =
         0.02505    0.00096    0.00588   -0.00077
N5    4    0.274441    0.381469    0.524182    11.00000    0.02280    0.03108 =
         0.03423   -0.00276    0.00925    0.00230
C1    1    0.295966    0.645334    0.421752    11.00000    0.02768    0.03031 =
         0.02684   -0.00406    0.00630   -0.00700
C2    1    0.193182    0.664228    0.439373    11.00000    0.02526    0.02413 =
         0.03080    0.00097    0.00558    0.00127
C3    1    0.103862    0.711565    0.401651    11.00000    0.02868    0.03213 =
         0.03897    0.00346    0.00287    0.00067
AFIX  43
H3    2    0.102695    0.737590    0.360523    11.00000   -1.20000
AFIX   0
C4    1    0.015310    0.720533    0.424971    11.00000    0.02474    0.04267 =
         0.05198    0.00900    0.00199    0.01156
AFIX  43
H4    2   -0.047309    0.753029    0.399635    11.00000   -1.20000
AFIX   0
C5    1    0.017775    0.682296    0.485069    11.00000    0.02184    0.03585 =
         0.05248    0.00259    0.01384    0.00371
AFIX  43
H5    2   -0.042894    0.688051    0.500999    11.00000   -1.20000
AFIX   0
C6    1    0.109876    0.635540    0.521662    11.00000    0.02178    0.02380 =
         0.03797   -0.00274    0.01186   -0.00283
C7    1    0.130144    0.592866    0.586481    11.00000    0.02493    0.02711 =
         0.03578   -0.00114    0.01255   -0.00147
C8    1    0.053367    0.584903    0.619448    11.00000    0.02765    0.03832 =
         0.05287    0.00201    0.01923    0.00068
AFIX  43
H8    2   -0.016735    0.605307    0.599861    11.00000   -1.20000
AFIX   0
C9    1    0.078546    0.547382    0.680690    11.00000    0.04132    0.05661 =
         0.05343    0.00668    0.03276    0.00234
AFIX  43
H9    2    0.026115    0.537766    0.703256    11.00000   -1.20000
AFIX   0
C10   1    0.181530    0.524282    0.708187    11.00000    0.04872    0.04827 =
         0.03357    0.00648    0.02236    0.00047
AFIX  43
H10   2    0.201297    0.501618    0.750817    11.00000   -1.20000
AFIX   0
C11   1    0.256890    0.533891    0.673986    11.00000    0.03210    0.03031 =
         0.03225    0.00034    0.01510   -0.00007
C12   1    0.371200    0.517312    0.704993    11.00000    0.03489    0.05688 =
         0.02244    0.00090    0.01179    0.00227
C13   1    0.248850    0.343504    0.464547    11.00000    0.03244    0.03549 =
         0.03603    0.00072    0.00992    0.00225
AFIX  43
H13   2    0.254080    0.400441    0.432904    11.00000   -1.20000
AFIX   0
C14   1    0.215478    0.226047    0.447344    11.00000    0.03513    0.03997 =
         0.04436   -0.00978    0.00279   -0.00298
AFIX  43
H14   2    0.197390    0.204359    0.404554    11.00000   -1.20000
AFIX   0
C15   1    0.208031    0.139415    0.491674    11.00000    0.02795    0.02686 =
         0.06477   -0.00393    0.00523    0.00129
C16   1    0.173275    0.010443    0.474773    11.00000    0.06620    0.03359 =
         0.08131    0.00006   -0.00873   -0.00438
AFIX  33
H16A  2    0.173295   -0.036103    0.512673    11.00000   -1.20000
H16B  2    0.102648    0.011347    0.447834    11.00000   -1.20000
H16C  2    0.221130   -0.028345    0.452747    11.00000   -1.20000
AFIX   0
C17   1    0.234094    0.178704    0.552906    11.00000    0.03400    0.03045 =
         0.05425    0.01142    0.00947    0.00598
AFIX  43
H17   2    0.229848    0.123036    0.585265    11.00000   -1.20000
AFIX   0
C18   1    0.266053    0.297507    0.567304    11.00000    0.02857    0.03279 =
         0.04064    0.00443    0.00900    0.00925
AFIX  43
H18   2    0.283046    0.321487    0.609784    11.00000   -1.20000
AFIX   0
C19   1    0.347645    0.820115    0.603647    11.00000    0.03168    0.03452 =
         0.02571    0.00526    0.00764    0.00245
AFIX  43
H19   2    0.285946    0.800423    0.616660    11.00000   -1.20000
AFIX   0
C20   1    0.391595    0.932815    0.618508    11.00000    0.04734    0.03084 =
         0.03173    0.00155    0.00833    0.00190
AFIX  43
H20   2    0.360255    0.988769    0.641563    11.00000   -1.20000
AFIX   0
C21   1    0.481915    0.967201    0.600361    11.00000    0.04551    0.03812 =
         0.02694    0.00111    0.00016   -0.01087
C22   1    0.531263    1.091209    0.615094    11.00000    0.07087    0.04790 =
         0.05342   -0.00045    0.00718   -0.02309
AFIX  33
H22A  2    0.490977    1.139184    0.638718    11.00000   -1.20000
H22B  2    0.602916    1.081261    0.639880    11.00000   -1.20000
H22C  2    0.532117    1.134149    0.576303    11.00000   -1.20000
AFIX   0
C23   1    0.523140    0.880064    0.567096    11.00000    0.03133    0.05348 =
         0.04616   -0.00144    0.01270   -0.01525
AFIX  43
H23   2    0.584199    0.898176    0.553073    11.00000   -1.20000
AFIX   0
C24   1    0.475470    0.767388    0.554447    11.00000    0.02979    0.04569 =
         0.03692   -0.00488    0.01451   -0.00393
AFIX  43
H24   2    0.506360    0.708825    0.532498    11.00000   -1.20000
AFIX   0
H1A   2    0.458340    0.418923    0.618684    11.00000    0.03503
H1B   2    0.510087    0.459160    0.572587    11.00000    0.03807
H1C   2    0.502255    0.530505    0.623061    11.00000    0.03801
H5A   2    0.349806    0.666722    0.303334    11.00000    0.07554
H5B   2    0.321139    0.611773    0.242027    11.00000    0.09695
HKLF 4
REM  20171211-Ru3NH3
REM R1 =  0.0545 for    5321 Fo > 4sig(Fo)  and  0.0834 for all    7063 data
REM    399 parameters refined using      0 restraints
END
WGHT      0.0518      3.2711
REM Instructions for potential hydrogen bonds
HTAB C13 O1
EQIV $1 x, -y+1/2, z+1/2
HTAB C17 F4_$1
HTAB C18 O3
EQIV $2 x, -y+3/2, z+1/2
HTAB C19 F6_$2
HTAB C19 N3
HTAB C20 F4_$2
HTAB N1 O3
EQIV $3 -x+1, -y+1, -z+1
HTAB N1 O1_$3
HTAB O5 O2
HTAB O5 F4
HTAB O5 F6
REM Highest difference peak  0.629,  deepest hole -0.785,  1-sigma level  0.090
Q1    1  -0.0303  0.5333  0.1821  11.00000  0.05    0.63
Q2    1   0.0654  0.5057  0.1189  11.00000  0.05    0.55
Q3    1   0.0518  0.4484  0.1374  11.00000  0.05    0.54
Q4    1   0.0229  0.6401  0.1294  11.00000  0.05    0.54
Q5    1   0.4540  0.6105  0.2701  11.00000  0.05    0.54
Q6    1   0.1232  0.6961  0.2155  11.00000  0.05    0.52
Q7    1   0.1032  0.4669  0.1529  11.00000  0.05    0.52
Q8    1   0.2069  0.4997  0.1834  11.00000  0.05    0.50
Q9    1   0.0532  0.6647  0.2271  11.00000  0.05    0.50
Q10   1   0.2282 -0.0449  0.4909  11.00000  0.05    0.48
;
_shelx_res_checksum   15936
_shelx_hkl_file
;
   0   0   3    0.58    1.10
   0   0  -3   -1.26    1.12
   0   0   4  221.81    4.61
   0   0  -4  218.62    5.45
   0   0   5   -4.57    2.13
   0   0  -5    0.45    1.98
   0   0   6  587.44   16.87
   0   0  -6  613.66   14.38
   0   0   7    0.00    2.41
   0   0  -7    1.89    2.38
   0   0   8 1727.28   61.89
   0   0  -8 1664.59   59.36
   0   0   9   -0.41    2.89
   0   0  -9    2.29    4.27
   0   0  10    8.29    3.41
   0   0 -10    8.56    3.11
   0   0  11  -10.44    5.63
   0   0 -11   -3.96    3.23
   0   0  12  493.92   16.13
   0   0 -12  496.04   15.03
   0   0  13    3.74    4.39
   0   0 -13    3.70    3.82
   0   0  14  696.96   24.97
   0   0 -14  683.53   27.28
   0   0  15   -5.49    5.21
   0   0 -15   -2.85    4.29
   0   0  16  204.50   14.53
   0   0 -16  177.53    8.51
   0   0  17   -4.25    6.06
   0   0 -17   -0.13    5.09
   0   0  18  330.69   16.01
   0   0 -18  294.18   13.20
   0   0  19    2.33    7.05
   0   0 -19    7.09    8.79
   0   0  20   96.65   15.77
   0   0 -20  111.52    8.71
   0   0  21   -8.70   12.91
   0   0 -21    7.55    6.69
   0   0  22   90.34   11.81
   0   0 -22   89.90    9.43
   0   0  23   15.70    9.56
   0   0 -23   -2.55    7.78
   0   0  24   18.87   10.75
   0   0 -24   23.74   13.16
   0   0  25   17.36   16.82
   0   0 -25    4.09    8.59
   0   0  26   25.07   12.68
   0   0 -26   22.55    9.56
   0   0  27    8.27   12.43
   0   0 -27    1.99    9.34
   0   1   0    0.06    0.76
   0   1   0    0.01    0.47
   0  -1   0   -0.18    0.69
   0  -1   0   -0.18    0.53
   0   1   2  647.79   12.27
   0   1  -2  671.23   12.56
   0  -1   2  627.09   12.05
   0  -1  -2  615.90   11.90
   0   1   3 1433.22   40.01
   0   1  -3 1469.88   40.22
   0  -1   3 1447.16   40.07
   0  -1  -3 1426.01   38.17
   0   1   4   47.99    2.22
   0   1  -4   49.26    3.32
   0  -1   4   49.14    3.50
   0  -1  -4   48.84    2.13
   0   1   5  192.99    5.01
   0   1  -5  189.44    4.78
   0  -1   5  197.38    6.51
   0  -1  -5  185.37    4.83
   0   1   6  733.16   20.44
   0   1  -6  704.85   19.43
   0  -1   6  719.61   18.17
   0  -1  -6  730.24   17.64
   0   1   7 1359.52   43.93
   0   1  -7 1464.01   45.79
   0  -1   7 1374.53   44.97
   0  -1  -7 1377.82   43.28
   0   1   8   20.08    4.38
   0   1  -8   11.36    2.65
   0  -1   8    7.99    4.49
   0  -1  -8    8.79    3.87
   0   1   9   14.39    3.23
   0   1  -9   17.82    2.91
   0  -1   9   12.54    5.06
   0  -1  -9   12.38    4.48
   0   1  10   12.37    5.23
   0   1 -10   17.24    3.18
   0  -1  10   21.32    5.43
   0  -1 -10   16.66    4.84
   0   1  11 1697.80   66.41
   0   1 -11 1626.74   62.35
   0  -1  11 1549.36   68.39
   0  -1 -11 1664.35   67.36
   0   1  12   37.11    4.59
   0   1 -12   32.34    6.19
   0  -1  12   32.25    7.04
   0  -1 -12   44.99    6.22
   0   1  13   68.33    7.96
   0   1 -13   59.57    4.84
   0  -1  13   65.80    8.29
   0  -1 -13   54.47    5.04
   0   1  14  145.26    7.78
   0   1 -14  148.85    7.11
   0  -1  14  144.43    7.84
   0  -1 -14  151.09    7.05
   0   1  15    0.46    5.17
   0   1 -15    4.60    6.85
   0  -1  15    2.88    5.15
   0  -1 -15   -0.01    4.36
   0   1  16  163.31    9.41
   0   1 -16  168.20    8.29
   0  -1  16  160.67    9.62
   0  -1 -16  159.43    8.30
   0   1  17   30.77    9.53
   0   1 -17   16.47    5.32
   0  -1 -17   11.86    5.44
   0   1  18   27.15    7.23
   0   1 -18   31.49    6.35
   0  -1  18   26.63    7.23
   0  -1 -18   27.65    6.36
   0   1  19  199.64   12.67
   0   1 -19  199.03   14.44
   0  -1  19  182.18   12.59
   0  -1 -19  193.55   15.09
   0   1  20   17.00   11.36
   0   1 -20    6.36    6.14
   0  -1  20    5.67   12.08
   0  -1 -20    5.83    6.21
   0   1  21  106.39   11.40
   0   1 -21   96.50    9.26
   0  -1  21  102.12   11.62
   0  -1 -21   91.25    9.12
   0   1  22    8.80    9.16
   0   1 -22   13.10    6.97
   0  -1  22   -7.52    9.41
   0  -1 -22   12.81    7.21
   0   1  23   68.47   12.10
   0   1 -23   92.48   15.19
   0  -1  23   94.01   12.81
   0  -1 -23  102.82   10.46
   0   1  24   30.22   16.29
   0   1 -24   16.52    8.80
   0  -1  24   38.30   11.09
   0  -1 -24   10.95    8.93
   0   1  25   46.39   12.42
   0   1 -25   40.63    9.65
   0  -1  25   39.14   19.04
   0  -1 -25   61.96   15.17
   0   1  26    2.61   12.25
   0   1 -26   13.38    9.46
   0  -1  26   18.98   18.64
   0  -1 -26    9.40    9.50
   0   1  27   36.69   13.31
   0   1 -27   39.19   16.06
   0  -1  27   22.26   14.10
   0  -1 -27   40.60   11.17
   0   2   0 2948.99  126.77
   0   2   0 2912.56  120.26
   0  -2   0 2880.87  122.93
   0  -2   0 3009.17  121.24
   0   2  -1  161.03    3.66
   0   2   1  150.11    4.07
   0   2  -1  160.47    3.30
   0  -2  -1  160.41    5.72
   0  -2   1  158.73    4.41
   0  -2  -1  160.10    3.30
   0   2   2  333.65    6.34
   0   2  -2  337.44    6.80
   0  -2  -2  328.62    6.43
   0   2   3   15.91    1.92
   0   2  -3   14.04    3.44
   0  -2  -3   16.51    2.00
   0   2   4    2.52    2.05
   0   2  -4    0.25    2.15
   0  -2   4    3.23    2.35
   0  -2  -4    3.81    2.13
   0   2   5  106.63    3.66
   0   2  -5  124.27    3.91
   0  -2   5  114.92    5.71
   0  -2  -5  112.56    3.64
   0   2   6  249.75    6.33
   0   2  -6  254.46    6.55
   0  -2   6  251.61    8.79
   0  -2  -6  238.93    7.64
   0   2   7  250.18    6.64
   0   2  -7  244.89    6.68
   0  -2   7  240.80    7.11
   0  -2  -7  232.09    6.40
   0   2   8   89.19    4.21
   0   2  -8   93.17    5.85
   0  -2   8   84.68    6.24
   0  -2  -8   84.67    4.05
   0   2   9   77.15    4.24
   0   2  -9   81.74    4.30
   0  -2   9   71.33    4.53
   0  -2  -9   71.15    5.70
   0   2  10   22.66    3.72
   0   2 -10   28.52    3.59
   0  -2  10   27.59    4.05
   0  -2 -10   28.42    3.46
   0   2  11   19.24    4.09
   0   2 -11   26.43    5.74
   0  -2  11   22.72    6.42
   0  -2 -11   21.46    3.81
   0   2  12  126.04    6.54
   0   2 -12  127.01    6.07
   0  -2  12  129.45    9.47
   0  -2 -12  118.02    5.75
   0   2  13  268.21   10.37
   0   2 -13  303.02   13.37
   0  -2  13  258.68   14.07
   0  -2 -13  262.60    9.57
   0   2 -14  646.76   21.56
   0  -2  14  610.13   23.09
   0  -2 -14  626.25   21.51
   0   2  15   65.93    6.70
   0   2 -15   68.80    5.86
   0  -2  15   64.64    6.87
   0  -2 -15   63.54    5.74
   0   2  16   -1.04    5.62
   0   2 -16   -2.28    7.34
   0  -2  16    2.72    8.71
   0  -2 -16    0.35    4.94
   0   2  17  301.81   20.10
   0   2 -17  312.45   13.46
   0  -2  17  319.49   20.45
   0  -2 -17  313.69   13.31
   0   2  18   68.62    8.31
   0   2 -18   72.22    7.29
   0  -2  18   68.10   12.84
   0  -2 -18   56.43    7.23
   0   2  19   35.76    7.97
   0   2 -19   40.84    9.81
   0  -2  19   36.00   12.82
   0  -2 -19   36.45   10.38
   0   2  20  103.84   14.85
   0   2 -20   98.10    8.60
   0  -2  20  104.99   11.15
   0  -2 -20   91.46   12.98
   0   2  21    4.13    8.59
   0   2 -21    3.84    6.50
   0  -2  21   -5.70    8.60
   0  -2 -21    7.18    7.11
   0   2  22   89.48   11.66
   0   2 -22   86.34   13.28
   0  -2  22   72.12   11.95
   0  -2 -22   64.19    9.68
   0   2  23    0.82    9.95
   0   2 -23   12.13    7.91
   0  -2  23   18.84   10.25
   0  -2 -23   12.34    8.06
   0   2  24   35.86   17.35
   0   2 -24   20.17    8.71
   0  -2  24   46.28   11.82
   0  -2 -24   32.28    9.46
   0   2  25   39.34   13.64
   0   2 -25   44.08   15.28
   0  -2  25   57.22   13.66
   0  -2 -25   68.94   10.92
   0   2  26   15.65   12.35
   0   2 -26   10.81    9.17
   0  -2  26   16.24   19.40
   0  -2 -26   12.55   15.30
   0   2  27   63.99   22.37
   0   2 -27   69.27   11.24
   0  -2  27   40.97   15.13
   0  -2 -27   42.04   18.08
   0   3   0    3.45    3.75
   0   3   0   -0.64    1.82
   0  -3   0   11.11    3.67
   0  -3   0    2.02    1.91
   0   3  -1  172.81    4.99
   0   3   1  173.71    4.24
   0   3  -1  158.99    3.96
   0  -3   1  166.01    4.43
   0  -3  -1  173.34    7.21
   0  -3   1  175.70    4.34
   0  -3  -1  163.84    4.12
   0   3   2 1990.44   68.39
   0   3  -2 1922.36   69.26
   0   3  -2 1886.60   65.49
   0  -3  -2 1920.65   75.39
   0  -3  -2 1925.43   67.09
   0   3   3   72.97    3.01
   0   3  -3   77.30    4.79
   0  -3  -3   73.39    4.16
   0   3   4  381.90   10.32
   0   3  -4  371.26    9.84
   0  -3  -4  367.46    8.55
   0   3   5   29.17    2.73
   0   3  -5   29.95    3.11
   0  -3  -5   34.34    2.69
   0   3   6  119.17    4.23
   0   3  -6  116.48    6.52
   0  -3   6  107.36    7.23
   0  -3  -6  126.48    5.78
   0   3   7  226.76    8.47
   0   3  -7  240.99    8.97
   0  -3   7  217.02    7.50
   0  -3  -7  208.56    6.32
   0   3   8   21.31    3.21
   0   3  -8   15.78    4.91
   0  -3   8   18.71    3.73
   0  -3  -8   18.04    4.75
   0   3   9  133.59    5.61
   0   3  -9  156.37    8.10
   0  -3   9  131.74    8.56
   0  -3  -9  139.75    5.64
   0   3  10    8.59    5.61
   0   3 -10    5.00    3.53
   0  -3  10   12.84    4.07
   0  -3 -10    8.33    3.40
   0   3  11   26.28    4.23
   0   3 -11   29.60    4.10
   0  -3  11   35.60    4.87
   0  -3 -11   21.31    4.00
   0   3  12    0.05    6.63
   0   3 -12   -1.27    5.91
   0  -3  12   16.05    6.96
   0  -3 -12    6.97    6.09
   0   3  13  189.07    8.68
   0   3 -13  196.10    8.28
   0  -3  13  197.69    9.29
   0  -3 -13  206.37   11.75
   0   3  14  294.39   15.94
   0   3 -14  295.07   11.28
   0  -3  14  276.09   12.54
   0  -3 -14  277.56   14.59
   0   3  15   -6.61    5.45
   0   3 -15   -4.38    4.84
   0  -3  15   -1.15    5.82
   0  -3 -15    0.92    4.93
   0   3  16  423.70   17.51
   0   3 -16  406.14   19.92
   0  -3  16  406.91   18.27
   0  -3 -16  392.69   15.96
   0   3  17    0.95   10.50
   0   3 -17    4.44    5.38
   0  -3  17    7.47    6.82
   0  -3 -17    9.12    5.65
   0   3  18   13.85    6.99
   0   3 -18   14.30    5.89
   0  -3  18   15.79    7.62
   0  -3 -18   12.66    9.56
   0   3  19  173.14   12.78
   0   3 -19  178.92   10.88
   0  -3  19  178.88   13.19
   0  -3 -19  195.77   15.58
   0   3  20   -1.85    8.04
   0   3 -20    1.63    6.61
   0  -3  20    4.80    8.29
   0  -3 -20   13.63   10.43
   0   3  21   56.20   10.36
   0   3 -21   62.08   12.73
   0  -3  21   52.72   10.83
   0  -3 -21   58.08   13.21
   0   3  22    4.19    9.73
   0   3 -22   18.07    7.85
   0  -3  22   18.43    9.86
   0  -3 -22   12.67    8.29
   0   3  23    9.01   15.32
   0   3 -23    7.81    7.86
   0  -3  23    8.94   10.78
   0  -3 -23   12.84    8.45
   0   3  24  104.16   14.48
   0   3 -24  134.08   16.48
   0  -3  24  101.76   14.71
   0  -3 -24  104.68   12.69
   0   3  25    2.30   11.39
   0   3 -25    3.80    8.69
   0  -3  25   12.26   17.64
   0  -3 -25   10.58    9.39
   0   3  26   62.74   20.67
   0   3 -26   37.41   10.48
   0  -3  26   49.34   21.12
   0  -3 -26   30.65   10.93
   0   3  27    1.26   13.19
   0   3 -27    4.44   14.95
   0  -3  27   17.92   20.93
   0  -3 -27    8.06   10.92
   0   4   0  300.20    8.73
   0   4   0  297.09    6.96
   0  -4   0  293.16    8.22
   0  -4   0  276.44    6.99
   0   4  -1 1015.10   32.69
   0   4   1  967.43   25.97
   0   4  -1 1013.66   26.72
   0  -4   1  958.79   26.51
   0  -4  -1  931.78   29.30
   0  -4  -1  935.98   27.91
   0  -4   1  955.51   29.88
   0   4  -2   88.17    5.95
   0   4   2   96.19    3.60
   0   4  -2   93.64    3.50
   0  -4  -2   86.55    4.96
   0  -4   2   96.54    3.73
   0  -4  -2   85.95    3.62
   0   4   3 1500.72   51.05
   0   4  -3 1432.23   49.28
   0   4  -3 1442.47   46.76
   0  -4  -3 1435.45   55.26
   0  -4  -3 1434.72   47.11
   0   4   4  266.44    7.07
   0   4  -4  253.98    7.51
   0   4  -4  258.34    8.33
   0  -4  -4  251.43    6.94
   0   4   5  295.16    7.85
   0   4  -5  280.73    8.37
   0   4  -5  299.80   11.47
   0  -4  -5  277.21    7.81
   0   4   6   67.33    3.82
   0   4  -6   53.41    4.34
   0  -4  -6   55.27    3.59
   0   4   7  281.60   10.35
   0   4  -7  274.18    8.56
   0  -4  -7  247.77    7.72
   0   4   8  185.70    6.63
   0   4  -8  181.55    6.95
   0  -4   8  188.97    7.87
   0  -4  -8  173.74    6.36
   0   4   9    2.89    3.59
   0   4  -9   -2.19    3.59
   0  -4   9    7.99    6.73
   0  -4  -9    3.90    3.40
   0   4  10   25.27    6.29
   0   4 -10   18.07    4.09
   0  -4  10   25.76    4.91
   0  -4 -10   26.66    4.10
   0   4  11   32.03    4.55
   0   4 -11   35.21    6.69
   0  -4  11   27.08    8.29
   0  -4 -11   37.85    4.59
   0   4  12   17.64    4.80
   0   4 -12   13.83    4.59
   0  -4  12   16.24    5.34
   0  -4 -12   26.34    4.66
   0   4  13  308.29   12.36
   0   4 -13  324.62   12.00
   0  -4  13  320.49   14.05
   0  -4 -13  293.95   11.87
   0   4  14   -0.51    8.29
   0   4 -14    3.11    7.08
   0  -4  14    3.49    5.93
   0  -4 -14    1.39    7.31
   0   4  15  255.51   12.47
   0   4 -15  266.36   11.63
   0  -4  15  240.95   18.18
   0  -4 -15  236.93   14.97
   0   4  16   -4.26    9.18
   0   4 -16    6.72    8.07
   0  -4  16    0.78   10.03
   0  -4 -16   -5.33    8.57
   0   4  17  123.68   10.19
   0   4 -17  152.35    9.34
   0  -4  17  130.01   11.04
   0  -4 -17  147.15   13.09
   0   4  18    4.24    7.19
   0  -4  18   -0.28    7.74
   0  -4 -18    9.57    9.50
   0   4  19   12.73   12.42
   0   4 -19    3.32    6.34
   0  -4  19    4.23    8.13
   0  -4 -19   -3.68   10.33
   0   4  20   30.15    9.40
   0   4 -20   27.04    7.40
   0  -4  20   28.08    9.49
   0  -4 -20   45.33   11.92
   0   4  21   17.36    9.47
   0   4 -21   30.67    7.46
   0  -4  21    9.29    9.85
   0  -4 -21   17.54   12.41
   0   4  22    0.63   14.29
   0   4 -22   -3.37    7.49
   0  -4  22   -2.33   10.37
   0  -4 -22   15.49   12.47
   0   4  23   59.38   12.15
   0   4 -23   71.83   15.24
   0  -4  23   75.33   12.95
   0  -4 -23   62.65   16.12
   0   4  24   18.46   11.11
   0   4 -24   -1.36    8.36
   0  -4  24    6.91   11.65
   0  -4 -24   10.72    9.48
   0   4  25  106.48   23.14
   0   4 -25   78.00   11.78
   0  -4  25   81.59   23.39
   0  -4 -25  102.69   12.97
   0   4  26   11.27   13.02
   0   4 -26   28.05   14.61
   0  -4  26   17.35   21.53
   0  -4 -26   12.10   11.07
   0   5   0    1.51    5.39
   0   5   0    1.99    2.42
   0  -5   0    0.98    5.01
   0  -5   0    4.38    4.12
   0   5  -1  181.22    7.04
   0   5   1  193.38    5.82
   0   5  -1  189.44    7.43
   0  -5   1  197.66    6.08
   0  -5  -1  186.29    7.17
   0  -5  -1  194.62    5.91
   0  -5   1  193.25    8.24
   0   5  -2  849.21   26.71
   0   5   2  880.58   24.64
   0   5  -2  847.22   23.68
   0  -5  -2  799.36   27.72
   0  -5   2  832.26   24.34
   0  -5  -2  843.03   24.26
   0   5   3  215.71    6.35
   0   5  -3  219.52    7.41
   0   5  -3  216.48    6.34
   0  -5  -3  194.41   11.52
   0  -5  -3  204.86    6.64
   0   5   4  898.51   26.48
   0   5  -4  843.01   30.83
   0   5  -4  905.11   26.55
   0  -5  -4  875.83   38.06
   0  -5  -4  917.10   27.47
   0   5   5  237.74    7.42
   0   5  -5  240.74    8.18
   0   5  -5  238.33    7.26
   0   5  -5  237.35   11.88
   0  -5  -5  244.84    7.61
   0   5   6  513.35   14.54
   0   5  -6  508.15   16.04
   0   5  -6  511.22   16.34
   0  -5  -6  510.72   14.90
   0   5   7   17.93    3.66
   0   5  -7   23.88    4.07
   0   5  -7   24.20    4.25
   0  -5  -7   19.59    3.68
   0   5   8   74.70    7.29
   0   5  -8   90.29    5.57
   0  -5  -8   85.83    7.28
   0   5   9   62.28    4.85
   0   5  -9   51.93    5.03
   0  -5  -9   56.70    4.70
   0   5  10    3.20    4.34
   0   5 -10    4.34    4.29
   0  -5 -10    2.65    3.96
   0   5  11  147.49    7.72
   0   5 -11  158.00   10.56
   0  -5 -11  170.99    7.84
   0   5  12  102.21    6.80
   0   5 -12   87.10    6.69
   0  -5  12   89.27    8.15
   0  -5 -12   97.35    6.64
   0   5  13   58.42    9.75
   0   5 -13   57.25    6.31
   0  -5  13   56.86    7.60
   0  -5 -13   56.31    6.17
   0   5  14  383.29   16.98
   0   5 -14  429.04   20.45
   0  -5  14  412.54   19.12
   0  -5 -14  421.93   16.84
   0   5  15   46.95    6.88
   0   5 -15   29.38    6.58
   0  -5  15   57.88    8.39
   0  -5 -15   42.47    9.89
   0   5  16  312.26   15.67
   0   5 -16  316.25   14.10
   0  -5  16  291.41   17.16
   0  -5 -16  299.09   19.60
   0   5  17    6.45    6.97
   0   5 -17   10.04    6.19
   0  -5  17    1.30    8.19
   0  -5 -17    7.15    9.75
   0   5  18    3.91   11.63
   0   5 -18   -4.91    6.55
   0  -5  18   -6.13   12.93
   0  -5 -18   22.65   10.27
   0   5  19   26.86    8.96
   0   5 -19   35.42    7.50
   0  -5  19   31.12   15.21
   0  -5 -19   29.79    8.00
   0   5  20   13.68    8.28
   0   5 -20  -10.46   10.64
   0  -5  20    5.12   14.31
   0  -5 -20   -8.81    7.79
   0   5  21   43.41   10.29
   0   5 -21   41.63    8.19
   0  -5  21   28.05   17.30
   0  -5 -21   33.82    9.23
   0   5  22   17.03   11.18
   0   5 -22   26.51   12.78
   0  -5  22   42.64   17.55
   0  -5 -22   32.73   14.25
   0   5  23   21.06   17.41
   0   5 -23   17.57    8.74
   0  -5  23   29.04   18.32
   0  -5 -23   32.77   14.48
   0   5  24   58.78   13.92
   0   5 -24   79.37   10.88
   0  -5  24   81.56   21.95
   0  -5 -24   66.72   18.05
   0   5  25   12.42   12.53
   0   5 -25   -1.61   14.10
   0  -5  25   17.23   19.94
   0  -5 -25   15.39   16.25
   0   5  26   86.80   22.49
   0   5 -26   59.39   11.54
   0  -5  26   75.28   26.00
   0  -5 -26   46.83   12.99
   0   6   0  217.39    8.98
   0   6   0  224.59    7.22
   0  -6   0  239.15   10.85
   0  -6   0  230.43    7.52
   0   6  -1    6.45    4.08
   0   6   1    4.64    2.99
   0   6  -1    1.57    3.02
   0  -6   1    5.78    3.30
   0  -6  -1   11.99    3.98
   0  -6  -1    4.75    3.19
   0  -6   1    6.21    3.43
   0   6   2  153.41    5.72
   0   6  -2  146.34    6.96
   0   6  -2  144.10    5.33
   0  -6   2  142.75    5.78
   0  -6  -2  139.93    7.41
   0  -6  -2  152.46    5.85
   0   6   3   42.56    3.70
   0   6  -3   42.39    4.72
   0   6  -3   36.05    3.46
   0  -6  -3   43.07    5.46
   0  -6  -3   35.89    3.90
   0   6   4    3.53    3.42
   0   6  -4   17.43    3.98
   0   6  -4    2.81    3.13
   0  -6  -4    4.81    5.13
   0  -6  -4    7.22    3.44
   0   6   5  121.95    5.72
   0   6  -5  127.46    6.65
   0   6  -5  127.51    5.57
   0   6  -5  124.56    7.19
   0  -6  -5  120.15    8.52
   0  -6  -5  126.50    7.98
   0   6   6  101.22    7.59
   0   6  -6   92.40    6.02
   0   6  -6   95.15    7.53
   0   6  -6  107.30    6.67
   0  -6  -6  102.18    8.54
   0  -6  -6   83.31    5.58
   0   6   7  573.37   18.10
   0   6  -7  580.50   24.27
   0   6  -7  563.21   20.30
   0  -6  -7  562.75   18.40
   0   6   8  179.93    7.71
   0   6  -8  172.71    8.57
   0   6  -8  194.47    8.77
   0  -6  -8  182.05    7.72
   0   6   9   27.19    4.62
   0   6  -9   26.55    5.31
   0   6  -9   21.08    5.14
   0  -6  -9   21.00    4.85
   0   6  10  217.84    9.20
   0   6 -10  191.87    9.27
   0  -6 -10  205.68    9.07
   0   6  11   17.18    5.27
   0   6 -11   19.91    5.38
   0  -6 -11   22.15    7.99
   0   6  12  170.14    9.07
   0   6 -12  188.64   12.82
   0  -6 -12  155.68    8.92
   0   6  13  135.00    8.77
   0   6 -13  154.36    8.82
   0  -6 -13  136.84    8.72
   0   6  14   60.79    7.56
   0   6 -14   64.12    6.99
   0  -6 -14   69.87    7.20
   0   6  15   80.84    8.48
   0   6 -15   80.75   11.77
   0  -6 -15   82.10    8.15
   0   6  16   16.80    7.52
   0   6 -16   26.41    6.57
   0  -6 -16    8.59   10.74
   0   6  17   59.09    9.42
   0   6 -17   33.77   11.42
   0  -6  17   66.74   10.49
   0  -6 -17   49.84   12.19
   0   6  18   73.37    9.87
   0   6 -18   69.71    8.77
   0  -6  18   56.14   11.57
   0  -6 -18   72.87    9.27
   0   6  19    8.49   13.31
   0   6 -19   19.51   11.14
   0  -6  19    2.59   10.26
   0  -6 -19   29.01    8.02
   0   6  20   19.16    9.99
   0   6 -20   29.89    8.27
   0  -6  20   36.05   11.77
   0  -6 -20   33.90    8.91
   0   6  21   -0.69    9.73
   0   6 -21    1.13   12.57
   0  -6  21   10.15   11.37
   0  -6 -21   -5.01    8.68
   0   6  22   44.79   18.86
   0   6 -22   46.34    9.62
   0  -6  22   48.29   20.69
   0  -6 -22   54.29   10.79
   0   6  23    3.39   11.43
   0   6 -23   13.88    8.62
   0  -6  23    5.88   19.55
   0  -6 -23    0.20   10.14
   0   6  24   17.04   12.44
   0   6 -24   17.98    9.52
   0  -6  24   32.09   22.03
   0  -6 -24   25.64   11.12
   0   6  25   30.44   21.38
   0   6 -25   28.63   10.49
   0  -6  25   25.51   23.48
   0  -6 -25   40.23   11.86
   0   7   0   -0.62    3.43
   0  -7   0    2.41    4.16
   0  -7   0   -3.30    5.98
   0   7   1  372.01   14.35
   0   7  -1  392.98   14.41
   0   7  -1  372.22   11.53
   0  -7   1  371.74   15.88
   0  -7  -1  375.49   17.44
   0  -7  -1  358.50   15.62
   0   7   2   10.93    5.71
   0   7  -2    8.21    7.44
   0   7  -2    5.72    3.41
   0  -7   2    9.70    3.90
   0  -7  -2    9.00    5.01
   0  -7  -2   12.33    3.93
   0   7   3  153.66    6.63
   0   7  -3  160.87    8.29
   0   7  -3  169.41    6.61
   0  -7  -3  163.96    9.24
   0  -7  -3  162.52    6.98
   0   7   4   14.59    3.94
   0   7  -4   15.36    4.85
   0   7  -4   15.89    3.78
   0  -7  -4   15.61    6.04
   0  -7  -4    9.57    4.18
   0   7   5   41.19    4.51
   0   7  -5   32.76    8.54
   0   7  -5   43.82    6.49
   0  -7  -5   38.22    7.36
   0  -7  -5   34.43    6.92
   0   7   6   92.45    8.43
   0   7  -6   87.65    9.54
   0   7  -6   96.01    5.55
   0   7  -6   87.97   10.56
   0  -7  -6   94.99    8.85
   0  -7  -6   80.00    6.05
   0   7   7  110.79    6.17
   0   7  -7   92.56   10.26
   0   7  -7   94.34    5.83
   0   7  -7  101.25   10.84
   0  -7  -7   91.90   14.96
   0  -7  -7   94.08    6.32
   0   7   8   37.07    5.17
   0   7  -8   34.66    8.99
   0   7  -8   36.13    4.88
   0   7  -8   28.22    9.22
   0  -7  -8   31.83    8.62
   0  -7  -8   32.58    5.26
   0   7   9  176.21    8.94
   0   7  -9  178.70    9.85
   0   7  -9  199.29   13.71
   0  -7  -9  187.57    9.16
   0   7  10   17.59    5.30
   0   7 -10   29.78    6.43
   0   7 -10   11.52    5.96
   0  -7 -10   20.84    5.55
   0   7  11  273.36   16.20
   0   7 -11  244.74   17.87
   0   7 -11  271.50   12.81
   0  -7 -11  277.78   16.44
   0   7  12   76.65    7.77
   0   7 -12   85.11    8.55
   0   7 -12   89.81    7.83
   0  -7 -12   64.00    7.61
   0   7  13   49.09   11.29
   0   7 -13   70.12   11.13
   0  -7 -13   60.68    7.41
   0   7  14   22.86    7.07
   0   7 -14   34.69    6.90
   0  -7 -14   27.71    7.02
   0   7  15   -1.51    6.77
   0   7 -15    8.37    6.31
   0  -7 -15    1.34    6.68
   0   7  16   31.93    8.41
   0   7 -16   45.01   11.79
   0  -7 -16   56.33   11.91
   0   7  17   24.58    7.92
   0   7 -17   10.46    7.27
   0  -7 -17   10.13    7.78
   0   7  18   81.82   10.53
   0   7 -18   57.00   13.77
   0  -7 -18   60.52    9.77
   0   7  19   79.90   12.07
   0   7 -19   88.86   10.18
   0  -7 -19   85.12   10.88
   0   7  20    6.05   15.08
   0   7 -20    8.61   12.36
   0  -7 -20    5.76    8.96
   0   7  21   44.28   12.00
   0   7 -21   42.02    9.98
   0  -7 -21   53.86   10.66
   0   7  22   -5.62   10.65
   0   7 -22   -5.21   13.54
   0  -7 -22   18.29    9.91
   0   7 -23   27.86    9.65
   0  -7 -23   26.54   11.10
   0   7  24    8.13   12.90
   0   7 -24   13.22    9.59
   0  -7 -24   15.40   11.24
   0   8   0  488.91   16.21
   0  -8   0  477.32   22.35
   0  -8   0  508.28   17.60
   0   8   1    5.34    4.23
   0   8  -1   -2.77    6.32
   0  -8   1   -0.31    4.66
   0  -8  -1    8.10    7.76
   0  -8  -1    0.75    4.43
   0   8   2   52.79    7.22
   0   8  -2   42.60    9.53
   0   8  -2   48.59    4.74
   0  -8   2   47.25    5.48
   0  -8  -2   37.13    6.56
   0  -8  -2   45.09    7.72
   0   8   3    3.44    4.13
   0   8  -3    7.21    8.69
   0   8  -3    7.70    4.07
   0  -8  -3    4.10    6.31
   0  -8  -3   -2.78    6.97
   0   8   4   29.08    4.85
   0   8  -4   24.47    6.09
   0   8  -4   23.49    4.50
   0  -8  -4   23.29    6.96
   0  -8  -4   23.50    5.10
   0   8  -5    0.06    5.67
   0   8  -5    3.80    6.26
   0  -8  -5    7.60    6.90
   0  -8  -5    6.82    4.71
   0   8   6   14.02    4.94
   0   8  -6    9.62    6.06
   0   8  -6   11.30    4.39
   0   8  -6   27.84   10.54
   0  -8  -6   33.38   11.83
   0  -8  -6   15.12    5.10
   0   8   7  195.04    9.39
   0   8  -7  199.47   11.10
   0   8  -7  204.32    8.99
   0   8  -7  207.61   11.92
   0  -8  -7  188.28   14.07
   0  -8  -7  196.97    9.76
   0   8   8  166.85   12.86
   0   8  -8  181.84   10.48
   0   8  -8  189.44   11.77
   0   8  -8  176.24   10.86
   0  -8  -8  171.53   14.37
   0  -8  -8  161.18    9.50
   0   8   9    9.44    5.61
   0   8  -9    1.86    6.24
   0   8  -9   15.06    9.44
   0   8  -9   -0.55    4.95
   0  -8  -9   16.24   13.98
   0   8  10  202.34   14.68
   0   8 -10  226.57   17.44
   0   8 -10  209.16   13.68
   0   8 -10  201.81   11.84
   0  -8 -10  218.46   17.14
   0  -8 -10  212.07   11.17
   0   8  11   -2.78    6.16
   0   8 -11    8.56    6.83
   0   8 -11    9.94    5.50
   0   8 -11    3.99    9.77
   0  -8 -11    6.76   10.61
   0  -8 -11   15.98    9.45
   0   8  12  237.33   12.81
   0   8 -12  225.58   19.63
   0   8 -12  239.18   13.37
   0  -8 -12  230.28   12.80
   0   8  13    5.99    6.85
   0   8 -13   17.22    7.82
   0   8 -13    7.26    6.92
   0  -8 -13    7.12    7.23
   0   8  14  186.33   17.11
   0   8 -14  183.69   19.40
   0   8 -14  184.28   16.20
   0  -8 -14  159.07   12.09
   0   8  15    2.96    7.64
   0   8 -15    6.54    8.12
   0   8 -15   -3.96    7.10
   0  -8 -15   18.44   11.34
   0   8  16   28.97   13.08
   0   8 -16   30.59    9.76
   0   8 -16   27.26    8.27
   0  -8 -16   39.93   13.16
   0   8  17    9.40    8.51
   0   8 -17   11.96   12.13
   0  -8 -17   11.07    8.60
   0   8  18  100.00   11.71
   0   8 -18   72.96   10.23
   0  -8 -18   75.24   11.25
   0   8  19  -12.04    9.80
   0   8 -19   10.30   12.29
   0  -8 -19    8.52    9.05
   0   8  20   62.25   12.43
   0   8 -20   61.11   10.28
   0  -8 -20   57.92   11.65
   0   8  21    1.63   16.34
   0   8 -21    5.07   13.67
   0  -8 -21  -17.92   10.27
   0   8  22   70.53   14.45
   0   8 -22   80.65   11.77
   0  -8 -22   55.00   13.17
   0   8  23   17.05   12.69
   0  -8 -23    2.68   11.37
   0   9   0   -3.34    7.28
   0  -9   0   -2.01    8.45
   0   9   1  126.78    7.32
   0   9  -1  131.30    7.35
   0  -9   1  124.65   11.16
   0  -9  -1  133.42    9.09
   0  -9  -1  117.12    8.13
   0   9   2   -0.21    4.78
   0   9  -2   -4.88    4.73
   0  -9  -2    0.57    6.13
   0  -9  -2    7.31    5.39
   0   9   3  183.87   12.42
   0   9  -3  181.89   15.61
   0   9  -3  190.08    8.83
   0  -9  -3  203.93   12.04
   0  -9  -3  182.64    9.57
   0   9   4   -0.98    5.10
   0   9  -4    4.04    4.53
   0  -9  -4    3.65    7.15
   0  -9  -4   -0.10    5.38
   0   9   5    5.41    5.22
   0   9  -5    1.50    9.71
   0   9  -5   22.25    7.28
   0  -9  -5   19.59   11.94
   0  -9  -5    4.92    5.42
   0   9   6    5.11    5.25
   0   9  -6   -0.64   10.18
   0   9  -6   15.93    7.56
   0   9  -6    0.75    4.69
   0  -9  -6    7.25    8.53
   0  -9  -6   14.23   12.72
   0   9   7   27.36    6.06
   0   9  -7   32.33   11.17
   0   9  -7   29.43    5.32
   0   9  -7   17.83    8.05
   0  -9  -7   28.58    9.33
   0  -9  -7   24.64    6.33
   0   9   8   -9.40    9.06
   0   9  -8    3.27    6.97
   0   9  -8   -3.44    7.63
   0   9  -8   -4.90    7.25
   0  -9  -8    4.28    9.44
   0  -9  -8   12.14    9.00
   0   9   9  208.27   11.41
   0   9  -9  182.84   12.49
   0   9  -9  195.87   10.15
   0   9  -9  188.78   12.68
   0  -9  -9  201.14   16.97
   0  -9  -9  204.16   11.54
   0   9  10   -2.19   10.27
   0   9 -10   20.77    7.65
   0   9 -10    5.49    8.51
   0   9 -10   -3.48   11.89
   0  -9 -10    8.39   11.03
   0  -9 -10   15.30    6.82
   0   9  11  299.48   16.00
   0   9 -11  335.12   25.06
   0   9 -11  331.36   15.34
   0   9 -11  330.84   17.63
   0  -9 -11  322.16   24.62
   0  -9 -11  317.70   22.03
   0   9  12   14.24   10.73
   0   9 -12    1.70    7.92
   0   9 -12   -5.07    6.27
   0   9 -12   -4.54    7.35
   0  -9 -12    2.27   18.62
   0  -9 -12   11.25    7.25
   0   9  13   67.97    8.84
   0   9 -13   63.50   15.81
   0   9 -13   82.21    8.16
   0   9 -13   70.65   13.86
   0  -9 -13   47.27   15.22
   0  -9 -13   42.07    8.99
   0   9  14   10.55   11.67
   0   9 -14    8.17    8.77
   0   9 -14  -10.31    6.73
   0   9 -14   11.40    7.53
   0  -9 -14   -0.47   13.97
   0  -9 -14   -4.96    7.76
   0   9  15    3.29    8.02
   0   9 -15   -3.04   14.31
   0   9 -15    2.50    7.80
   0  -9 -15   -5.98   12.86
   0   9  16   45.19    9.47
   0   9 -16   39.37   11.19
   0   9 -16   53.63   13.79
   0  -9 -16   41.97    9.94
   0   9  17   42.50   10.99
   0   9 -17   44.84   11.89
   0   9 -17   45.35   10.03
   0  -9 -17   46.98   10.19
   0   9  18   14.53   10.17
   0   9 -18    3.20   11.34
   0   9 -18   11.62   13.25
   0  -9 -18    2.08    9.35
   0   9  19   57.26   18.52
   0   9 -19   51.08   10.52
   0  -9 -19   69.40   11.74
   0   9  20   12.59   11.62
   0   9 -20    7.07    9.38
   0  -9 -20   18.79   10.62
   0   9  21   53.58   14.22
   0   9 -21   62.36   11.68
   0  -9 -21   70.66   13.11
   0  10   0  105.25    7.53
   0 -10   0   98.70    8.43
   0  10   1    3.74    5.31
   0  10  -1    1.63    8.26
   0 -10   1    1.59    5.85
   0 -10  -1    0.29    6.46
   0 -10  -1    2.17    6.01
   0  10   2   62.39    6.68
   0  10  -2   53.83    6.59
   0 -10  -2   60.51    8.41
   0 -10  -2   69.17   11.43
   0  10   3  201.86   11.06
   0  10  -3  219.99   10.71
   0 -10  -3  228.95   13.69
   0 -10  -3  204.70   12.12
   0  10   4   24.57    9.66
   0  10  -4   13.07    6.06
   0 -10  -4   22.14    8.65
   0 -10  -4   38.82   10.22
   0  10   5  191.91   10.89
   0  10  -5  192.15   13.03
   0  10  -5  187.98   10.15
   0 -10  -5  188.43   20.96
   0 -10  -5  188.78   11.60
   0  10   6    6.79    9.05
   0  10  -6    9.61    7.63
   0  10  -6   -6.66    8.76
   0  10  -6   -5.64    5.85
   0 -10  -6    5.24    6.52
   0 -10  -6   13.67   13.62
   0  10   7   10.29    6.42
   0  10  -7   10.64    8.01
   0  10  -7    7.73    8.51
   0  10  -7    9.94    5.69
   0 -10  -7   13.33    6.92
   0 -10  -7   18.14    9.58
   0  10   8   58.18   11.44
   0  10  -8   68.77   10.28
   0  10  -8   64.72    9.69
   0  10  -8   56.50    9.75
   0 -10  -8   58.99   12.55
   0 -10  -8   51.02   18.28
   0  10   9   33.74    7.67
   0  10  -9   25.18   13.76
   0  10  -9   36.41    6.56
   0  10  -9   21.97   13.53
   0 -10  -9   50.20   12.02
   0 -10  -9   30.13    8.01
   0  10  10  125.24   15.08
   0  10 -10  137.80   12.81
   0  10 -10  118.84    9.09
   0  10 -10  145.23   12.45
   0 -10 -10  114.64   16.40
   0 -10 -10  117.88   10.46
   0  10  11    5.58    7.52
   0  10 -11   10.85    9.32
   0  10 -11   11.16    6.53
   0  10 -11   20.22    8.49
   0 -10 -11   10.06   12.80
   0 -10 -11    4.91    7.64
   0  10  12   15.60   12.05
   0  10 -12   18.55   14.89
   0  10 -12    5.98    6.73
   0  10 -12   10.37   12.57
   0 -10 -12    8.83   19.61
   0 -10 -12   11.74    8.18
   0  10  13   19.20    8.58
   0  10 -13   32.49   10.22
   0  10 -13   19.28   11.56
   0  10 -13   31.78    9.02
   0 -10 -13   14.10   14.92
   0 -10 -13   33.32    8.77
   0  10  14   17.45    8.72
   0  10 -14   30.74   16.00
   0  10 -14   13.60    7.75
   0  10 -14   16.27    9.20
   0 -10 -14   15.67   15.57
   0 -10 -14   31.50   13.93
   0  10  15   42.79   10.93
   0  10 -15   53.75   12.12
   0  10 -15   49.11    8.88
   0  10 -15   55.67   15.31
   0 -10 -15   36.63   26.60
   0 -10 -15   45.06   10.47
   0  10  16   14.55    9.61
   0  10 -16   17.67   11.54
   0  10 -16   14.60   12.92
   0  10 -16    6.56    9.41
   0 -10 -16    6.84   17.15
   0 -10 -16   15.44    9.57
   0  10  17   40.40   17.53
   0  10 -17   56.90   19.59
   0  10 -17   41.99    9.42
   0  10 -17   43.20   10.57
   0 -10 -17   48.13   19.85
   0 -10 -17   45.32   11.10
   0  10  18   32.09   11.35
   0  10 -18   31.77   13.43
   0  10 -18   31.33    9.43
   0  10 -18   28.58   10.39
   0 -10 -18   16.43   19.15
   0 -10 -18   31.02   11.59
   0  10  19   26.60   11.15
   0  10 -19   29.59   13.50
   0  10 -19   14.17    9.58
   0  10 -19   22.30   10.16
   0 -10 -19   19.30   20.60
   0 -10 -19    9.70   11.25
   0  11   0    8.37    9.08
   0 -11   0    4.83    6.81
   0  11   1   33.58    6.73
   0  11  -1   25.95    6.89
   0 -11  -1   19.02    7.90
   0  11   2   89.37   12.19
   0  11  -2   87.61   11.76
   0 -11  -2   90.78    9.85
   0 -11  -2   79.80    9.48
   0  11   3   -3.13    6.70
   0  11  -3   20.46    6.42
   0 -11  -3   10.03    8.00
   0 -11  -3   -1.21   11.68
   0  11   4  130.87    9.72
   0  11  -4  125.87   12.94
   0 -11  -4  114.20   12.55
   0 -11  -4  124.92   10.77
   0  11   5    0.92    6.50
   0  11  -5    7.38    8.18
   0  11  -5   -3.91    9.28
   0  11  -5    0.67    6.01
   0 -11  -5  -14.47   11.36
   0 -11  -5    3.29   14.02
   0  11   6   49.11    7.93
   0  11  -6   39.05    9.90
   0  11  -6   56.70   16.74
   0  11  -6   45.19   10.84
   0 -11  -6   46.80    8.71
   0 -11  -6   54.07   11.22
   0  11   7    9.08    7.24
   0  11  -7    5.61   13.57
   0  11  -7   14.38    9.54
   0  11  -7    6.80    6.47
   0 -11  -7   13.37   12.20
   0 -11  -7    5.63   10.60
   0  11   8   47.77   13.42
   0  11  -8   72.90   16.56
   0  11  -8   57.08   11.01
   0  11  -8   75.50   11.54
   0 -11  -8   65.34    9.32
   0 -11  -8   76.57   20.07
   0  11   9   24.80    8.19
   0  11  -9   13.16    9.65
   0  11  -9   13.39   14.42
   0  11  -9   14.47    6.75
   0 -11  -9   18.80    8.21
   0 -11  -9   36.34   12.27
   0  11  10    4.98   11.87
   0  11 -10   10.16    6.65
   0  11 -10   -5.17    9.38
   0  11 -10   -1.33    9.15
   0 -11 -10   -8.59   12.02
   0 -11 -10   16.98   18.56
   0  11  11    9.15    8.30
   0  11 -11    9.31   15.47
   0  11 -11    7.64    6.83
   0  11 -11   12.24    9.12
   0 -11 -11   -1.64   13.60
   0 -11 -11   -1.93    8.43
   0  11  12    3.92   12.80
   0  11 -12    4.30   10.03
   0  11 -12    5.92    6.93
   0  11 -12   12.83   13.58
   0 -11 -12   -6.89   21.21
   0 -11 -12    2.95    8.74
   0  11  13    4.18    8.92
   0  11 -13    8.10   16.87
   0  11 -13   14.24   10.69
   0  11 -13    3.86    9.23
   0 -11 -13    7.63   14.73
   0 -11 -13   20.87   13.92
   0  11  14   63.25   11.06
   0  11 -14   48.31   12.67
   0  11 -14   57.44    9.32
   0  11 -14   53.70   11.19
   0 -11 -14   54.73   18.09
   0 -11 -14   45.25   11.30
   0  11  15    8.43    9.83
   0  11 -15    2.51   18.17
   0  11 -15    5.02    8.01
   0  11 -15   13.75   14.96
   0 -11 -15   18.07   25.61
   0 -11 -15    5.68   10.17
   0  11  16   59.14   12.51
   0  11 -16   64.51   14.54
   0  11 -16   72.14   15.24
   0  11 -16   57.33   11.89
   0 -11 -16   65.26   21.06
   0 -11 -16   78.36   12.97
   0  11  17   18.76   16.33
   0  11 -17   12.55   12.92
   0  11 -17    1.33   13.91
   0  11 -17   21.66   15.51
   0 -11 -17   19.87   19.02
   0 -11 -17    1.72   11.23
   0  12   0    0.95    6.71
   0  12   1   14.75   10.68
   0  12  -1  -23.55   10.12
   0 -12  -1    2.74    7.68
   0  12   2    1.26    7.05
   0  12  -2   -3.51    6.80
   0 -12  -2    2.79    8.23
   0  12   3  100.75   14.24
   0  12  -3  109.66   13.64
   0 -12  -3   80.82   11.62
   0 -12  -3   93.23   10.88
   0  12   4    3.30    7.31
   0  12  -4   -5.95    6.91
   0 -12  -4    4.84    9.58
   0 -12  -4   12.34    8.60
   0  12   5   91.32   14.62
   0  12  -5   82.00   13.74
   0  12  -5   80.13    9.11
   0 -12  -5   95.89   11.42
   0 -12  -5   98.71   19.19
   0  12   6    9.15    8.04
   0  12  -6   10.15   10.88
   0  12  -6   16.41    7.03
   0 -12  -6   10.34    8.87
   0 -12  -6    3.73   10.45
   0  12   7   40.69    8.89
   0  12  -7   45.87   10.83
   0  12  -7   42.00   12.26
   0  12  -7   46.41    8.02
   0 -12  -7   57.23   14.48
   0 -12  -7   42.09   12.62
   0  12   8   -7.43    8.13
   0  12  -8    9.29   10.10
   0  12  -8    5.02   10.44
   0  12  -8   -2.14   10.81
   0 -12  -8    6.82    8.71
   0 -12  -8   15.50   18.29
   0  12   9   23.99    9.44
   0  12  -9   35.50   16.90
   0  12  -9   31.83   16.97
   0  12  -9   42.35    8.07
   0 -12  -9   25.56   15.36
   0 -12  -9   48.34   14.26
   0  12  10   -4.28   12.71
   0  12 -10    2.10   10.52
   0  12 -10   -3.35   10.50
   0  12 -10    1.54   11.07
   0 -12 -10    8.71    9.01
   0 -12 -10   10.50   20.70
   0  12  11   -4.00    9.09
   0  12 -11    7.29   10.50
   0  12 -11    8.53   10.10
   0  12 -11   -5.35    7.51
   0 -12 -11   11.70    9.37
   0 -12 -11   14.53   14.24
   0  12  12   18.71   14.67
   0  12 -12   15.91   18.08
   0  12 -12   25.48   16.56
   0  12 -12   15.18    8.08
   0 -12 -12   14.82   10.18
   0 -12 -12   16.76   23.42
   0  12  13   14.90   10.34
   0  12 -13   15.39   11.96
   0  12 -13   12.40   12.47
   0  12 -13   25.26   10.91
   0 -12 -13   20.88   16.50
   0 -12 -13   23.10   16.51
   0  12  14    9.33    9.79
   0  12 -14    9.66   18.16
   0  12 -14   -0.52    8.28
   0  12 -14    8.46   10.33
   0 -12 -14    2.06   16.88
   0 -12 -14   -3.00   10.59
   0  13   0   10.47   11.75
   0  13   1   28.94    8.28
   0  13  -1   12.30    7.93
   0  13   2   39.90   12.66
   0  13  -2   14.58    8.20
   0 -13  -2   21.54    9.30
   0  13   3   16.23    7.83
   0  13  -3   -2.53    7.83
   0 -13  -3   -2.08    9.49
   0  13   4   54.44    9.45
   0  13  -4   51.32    9.07
   0  13  -4   42.05   14.08
   0 -13  -4   52.83   11.73
   0  13   5   20.23    8.65
   0  13  -5   17.26   12.85
   0  13  -5   23.11   12.49
   0 -13  -5   27.01   10.36
   0 -13  -5   15.43   16.77
   0  13   6   57.70   10.33
   0  13  -6   50.89   14.52
   0  13  -6   46.22    9.52
   0 -13  -6   92.49   17.27
   0 -13  -6   55.40   13.38
   0  13   7   15.29   14.10
   0  13  -7   28.76   18.50
   0  13  -7    4.74   12.67
   0 -13  -7   30.50   10.86
   0 -13  -7   24.58   12.85
   0  13   8   53.22   10.55
   0  13  -8   41.24   13.34
   0  13  -8   58.34    9.56
   0 -13  -8   55.82   12.15
   0 -13  -8   53.75   21.69
   0  13   9    2.80   14.45
   0  13  -9   14.63   11.72
   0  13  -9   13.88    8.34
   0 -13  -9   10.20   10.15
   0 -13  -9   13.35   14.17
   0  13  10   31.23    9.98
   0  13 -10   -9.84   18.29
   0  13 -10   12.58   13.16
   0 -13 -10   16.64   10.98
   0 -13 -10   14.52   22.18
   0  14   0   38.42    9.77
   0  14   1    5.92   13.34
   0  14  -1    5.15    8.53
   0  14   2   19.56    9.46
   0  14  -2   29.86    9.16
   0  14   3   22.76    9.19
   0  14  -3   15.09    8.88
   1   0 -28   61.47   12.11
  -1   0  28   77.77   15.75
   1   0 -27    6.87    9.15
  -1   0  27   13.00   18.69
   1   0 -26   29.22   14.13
  -1   0  26   18.48   11.60
   1   0 -25   -0.86    7.83
  -1   0  25   -0.20   10.29
   1   0 -24   40.53    8.69
  -1   0  24   39.89   10.85
   1   0 -23   18.04    7.19
  -1   0  23   -0.51   14.24
   1   0 -22    4.22    6.63
  -1   0  22    6.84    8.47
   1   0 -21    4.05    9.27
  -1   0  21    3.11    7.78
   1   0 -20   46.21    6.89
  -1   0  20   47.38    8.32
   1   0 -19    5.05    5.35
  -1   0  19    5.24    7.04
   1   0 -18  329.87   13.41
  -1   0  18  310.30   19.20
   1   0 -17   -1.16    4.69
  -1   0  17    4.11    5.43
   1   0 -16  159.43   10.12
  -1   0  16  143.24    8.37
   1   0 -15    3.65    6.22
  -1   0  15   -3.63    4.65
   1   0 -14  898.58   30.28
  -1   0  14  895.72   36.34
   1   0 -13    7.68    3.39
  -1   0  13    0.81    4.04
   1   0 -12 1366.56   47.90
  -1   0  12 1320.15   48.95
   1   0 -11    1.68    2.81
  -1   0  11    6.00    5.03
   1   0 -10   93.07    4.00
  -1   0  10   90.79    4.57
   1   0  -9    3.31    2.34
  -1   0   9    0.27    2.64
   1   0  -8   58.85    2.89
  -1   0   8   59.40    4.66
   1   0  -7   -3.66    1.90
  -1   0   7   -0.57    2.00
   1   0  -6 6591.58  513.40
  -1   0   6 6977.67  552.24
   1   0  -5    0.32    1.55
  -1   0   5   -1.26    1.65
   1   0  -4   23.77    1.32
  -1   0   4   14.18    1.33
   1   0  -3    0.59    0.77
  -1   0   3    0.82    1.19
   1   0   1   -0.77    0.77
  -1   0  -1    1.14    0.80
   1   0   2 5176.69  313.19
  -1   0  -2 5077.80  305.73
   1   0   3    2.02    1.68
  -1   0  -3    2.85    1.60
   1   0   4   94.77    4.65
  -1   0  -4  102.49    3.34
   1   0   5   -0.26    2.56
  -1   0  -5   -0.05    2.33
   1   0   6  273.48    7.29
  -1   0  -6  271.28    7.12
   1   0   7    4.79    2.78
  -1   0  -7    2.21    2.52
   1   0   8    4.43    3.08
  -1   0  -8   -1.97    2.67
   1   0   9   -0.54    3.28
  -1   0  -9    2.01    4.77
   1   0  10  842.48   26.46
  -1   0 -10  798.15   24.68
   1   0  11    9.33    6.09
  -1   0 -11    3.37    3.60
   1   0  12  518.82   21.75
  -1   0 -12  535.40   17.18
   1   0  13   -4.79    4.83
  -1   0 -13   -5.80    6.14
   1   0  14  124.65    7.92
  -1   0 -14  122.18    6.81
   1   0  15    2.88    5.57
  -1   0 -15    1.36    4.61
   1   0  16  656.99   28.12
  -1   0 -16  686.50   25.49
   1   0  17    7.17   10.32
  -1   0 -17    6.04    8.56
   1   0  18    3.93   10.93
  -1   0 -18   -3.51    5.66
   1   0  19    6.53    7.49
  -1   0 -19   -1.88    6.10
   1   0  20  115.06   11.95
  -1   0 -20  130.99    9.91
   1   0  21   -2.36    9.02
  -1   0 -21   -0.98   10.86
   1   0  22   63.91   11.35
  -1   0 -22   56.77    8.87
   1   0  23   -1.86   15.77
  -1   0 -23   -2.28    7.73
   1   0  24  123.10   16.16
  -1   0 -24  145.28   13.08
   1   0  25    2.51   12.00
  -1   0 -25   18.17   14.06
   1   0  26   31.36   13.45
  -1   0 -26   27.71   10.42
   1   0  27   24.44   13.18
  -1   0 -27   -5.27   10.02
   1   1 -28   -5.21    9.48
  -1   1  28    9.08   12.86
   1  -1 -28   15.23   15.00
  -1  -1  28   -0.83   13.01
   1   1 -27   36.50   10.84
  -1   1  27   42.26   13.78
   1  -1 -27   59.77   11.11
  -1  -1  27   75.12   20.67
   1   1 -26   -1.15    8.50
  -1   1  26   13.64   17.39
   1  -1 -26    7.06    8.81
  -1  -1  26   17.72   11.24
   1   1 -25   87.73   15.31
  -1   1  25  106.65   14.08
   1  -1 -25   91.41   11.43
  -1  -1  25   92.62   13.73
   1   1 -24   29.09    7.97
  -1   1  24   15.46   10.63
   1  -1 -24   25.50    8.47
  -1  -1  24   12.59   10.23
   1   1 -23   -3.32    7.01
  -1   1  23   -6.72    8.98
   1  -1 -23    5.66    7.48
  -1  -1  23   20.77   14.14
   1   1 -22   70.03    8.20
  -1   1  22   36.53   14.86
   1  -1 -22   70.41   12.60
  -1  -1  22   75.53   15.26
   1   1 -21   22.69    9.72
  -1   1  21   14.80    7.85
   1  -1 -21   14.85   10.04
  -1  -1  21    5.26    8.06
   1   1 -20   40.74    9.71
  -1   1  20   41.33    8.30
   1  -1 -20   35.29    6.91
  -1  -1  20   43.36    8.18
   1   1 -19   58.43    6.68
  -1   1  19   63.02   12.21
   1  -1 -19   63.80    6.91
  -1  -1  19   60.66    8.22
   1   1 -18    4.90    5.11
  -1   1  18   -3.79    6.04
   1  -1 -18   -6.81    5.14
  -1  -1  18   -0.42    5.98
   1   1 -17  319.74   12.42
  -1   1  17  321.71   14.65
   1  -1 -17  332.90   12.95
  -1  -1  17  340.94   18.89
   1   1 -16   43.27    7.28
  -1   1  16   30.99    8.71
   1  -1 -16   29.18    5.03
  -1  -1  16   28.88    5.77
   1   1 -15    3.50    3.97
  -1   1  15   -0.04    4.67
   1  -1 -15    9.48    4.20
  -1  -1  15    7.86    4.67
   1   1 -14   43.84    4.44
  -1   1  14   45.34    5.38
   1  -1 -14   49.76    4.42
  -1  -1  14   42.60    5.16
   1   1 -13   53.40    4.37
  -1   1  13   54.66    7.72
   1  -1 -13   59.29    4.43
  -1  -1  13   67.86    5.12
   1   1 -12  225.02    9.60
  -1   1  12  210.20    7.86
   1  -1 -12  229.54    7.50
  -1  -1  12  228.70    8.22
   1   1 -11  272.49    8.03
  -1   1  11  273.25    8.58
   1  -1 -11  260.36    7.94
  -1  -1  11  278.30    8.79
   1   1 -10   67.46    3.68
  -1   1  10   55.10    3.97
   1  -1 -10   68.51    3.79
  -1  -1  10   59.44    5.91
   1   1  -9  633.71   18.27
  -1   1   9  627.38   16.76
   1  -1  -9  621.87   16.19
  -1  -1   9  634.02   19.49
   1   1  -8   14.88    2.19
  -1   1   8   11.29    2.60
   1  -1  -8   17.71    2.48
  -1  -1   8   21.16    4.03
   1   1  -7 1943.70   64.82
  -1   1   7 1768.51   61.40
   1  -1  -7 1811.55   65.51
  -1  -1   7 1723.28   63.92
   1   1  -6   -0.76    1.75
  -1   1   6    5.28    2.91
   1  -1  -6    3.06    1.91
  -1  -1   6   -0.14    1.91
   1   1  -5   16.83    1.65
  -1   1   5   19.12    1.98
   1  -1  -5   14.94    1.92
  -1  -1   5   14.39    1.72
   1   1  -4  249.10    4.35
  -1   1   4  239.14    4.77
  -1  -1   4  243.57    4.40
   1   1  -3 2188.61   65.50
  -1   1   3 2155.35   68.71
   1  -1  -3 1999.76   64.75
  -1  -1   3 1904.65   59.71
  -1   1   2   31.85    1.31
   1  -1  -2   30.04    1.34
   1   1  -1  468.83    9.38
  -1   1   1  460.90    7.63
   1  -1  -1  474.78    7.90
  -1  -1   1  461.51    9.14
   1   1   0 1430.81   40.40
  -1   1   0 1315.88   33.20
  -1  -1   0 1361.98   38.75
  -1  -1   0 1416.36   31.31
   1   1   1  379.23    5.85
  -1   1  -1  403.67    8.02
  -1  -1  -1  397.00    8.97
  -1  -1  -1  393.38    6.46
   1   1   2    1.00    1.13
  -1   1  -2    4.98    1.75
   1  -1   2    3.23    2.92
  -1  -1  -2    5.31    1.14
   1   1   3  112.94    2.99
  -1   1  -3  124.41    3.63
   1  -1   3  114.86    3.82
  -1  -1  -3  116.20    2.86
   1   1   4 2277.21   85.21
  -1   1  -4 2136.42   85.06
   1  -1   4 2029.80   82.14
  -1  -1  -4 2140.30   77.23
   1   1   5 4282.22  242.35
  -1   1  -5 3970.25  231.66
   1  -1   5 4374.28  255.80
  -1  -1  -5 4152.62  234.83
   1   1   6  372.86   11.12
  -1   1  -6  379.65   11.60
   1  -1   6  377.63   10.19
  -1  -1  -6  375.78    9.08
   1   1   7   24.51    3.27
  -1   1  -7   29.26    3.19
   1  -1   7   30.87    3.46
  -1  -1  -7   31.81    2.90
   1   1   8   14.68    3.35
  -1   1  -8   14.74    3.11
   1  -1   8   26.65    5.35
  -1  -1  -8   12.84    2.97
   1   1   9  111.15    5.30
  -1   1  -9  117.36    7.38
   1  -1   9  113.99    7.67
  -1  -1  -9  118.19    6.46
   1   1  10   23.47    6.21
  -1   1 -10   36.12    3.95
   1  -1  10   31.40    4.36
  -1  -1 -10   34.62    5.61
   1   1  11    6.52    3.93
  -1   1 -11    3.55    3.74
   1  -1  11    2.56    4.10
  -1  -1 -11   -0.40    3.49
   1   1  12   86.83    5.90
  -1   1 -12   90.05    5.53
   1  -1  12   92.46    6.06
  -1  -1 -12   89.08    5.40
   1   1  13  689.85   24.64
  -1   1 -13  737.64   24.11
   1  -1  13  641.99   24.52
  -1  -1 -13  691.70   23.24
   1   1  14   12.34    8.28
  -1   1 -14   19.93    7.34
   1  -1  14   17.36    5.64
  -1  -1 -14   17.17    4.50
   1   1  15  158.94    9.16
  -1   1 -15  162.15    8.17
   1  -1  15  151.07   13.22
  -1  -1 -15  142.04    7.94
   1   1  16   34.17    6.53
  -1   1 -16   31.00    5.84
   1  -1  16   39.33   10.53
  -1  -1 -16   30.33    8.57
   1   1  17  113.79    9.69
  -1   1 -17  126.42   12.07
   1  -1  17  130.77   14.77
  -1  -1 -17  123.36   11.88
   1   1  18   48.09   12.28
  -1   1 -18   48.62    6.83
   1  -1  18   59.88    8.62
  -1  -1 -18   54.26    6.77
   1   1  19   -1.77    7.69
  -1   1 -19   -2.87    6.07
   1  -1  19    9.85    8.08
  -1  -1 -19    1.79    6.13
   1   1  20    0.79    8.59
  -1   1 -20   14.32    6.59
   1  -1  20   18.98    8.65
  -1  -1 -20    6.46    6.75
   1   1  21  108.41   12.95
  -1   1 -21  138.07   15.15
   1  -1  21  110.78   12.98
  -1  -1 -21  124.94   10.47
   1   1  22   35.77   15.00
  -1   1 -22    3.59    7.50
   1  -1  22   14.63   10.07
  -1  -1 -22   19.62   11.26
   1   1  23   97.38   13.75
  -1   1 -23  117.67   11.25
   1  -1  23  121.96   20.84
  -1  -1 -23  107.27   11.54
   1   1  24   10.68   11.27
  -1   1 -24  -14.93   13.29
   1  -1  24   -3.54   17.48
  -1  -1 -24    9.29    8.54
   1   1  25   64.80   14.09
  -1   1 -25   64.38   11.25
   1  -1  25   65.33   14.94
  -1  -1 -25   66.71   10.94
   1   1  26    0.33   12.79
  -1   1 -26    4.92    9.63
   1  -1  26    8.60   12.94
  -1  -1 -26    4.55   10.12
   1   1  27   14.70   22.48
  -1   1 -27   20.98   10.85
   1  -1  27   25.11   14.21
  -1  -1 -27   51.43   16.82
   1   2 -27   -4.09   13.90
  -1   2  27    7.47   12.18
   1  -2 -27   -8.24    9.72
  -1  -2  27    8.87   18.73
   1   2 -26   64.01   10.58
  -1   2  26   55.30   13.95
   1  -2 -26   75.87   11.23
  -1  -2  26   63.42   13.73
   1   2 -25   52.03    9.45
  -1   2  25   40.78   18.43
   1  -2 -25   48.93    9.96
  -1  -2  25   47.44   12.96
   1   2 -24   37.11   13.26
  -1   2  24   46.05   11.27
   1  -2 -24   51.17   14.15
  -1  -2  24   42.92   12.19
   1   2 -23  160.41   11.89
  -1   2  23  161.28   14.72
   1  -2 -23  173.66   18.18
  -1  -2  23  174.98   14.99
   1   2 -22   11.84    6.48
  -1   2  22    7.12   13.14
   1  -2 -22    1.38   11.08
  -1  -2  22    2.85   13.58
   1   2 -21  145.89    9.78
  -1   2  21  131.55   11.73
   1  -2 -21  122.69   10.27
  -1  -2  21  138.12   17.15
   1   2 -20   74.26   11.50
  -1   2  20   89.08    9.97
   1  -2 -20   95.53    8.80
  -1  -2  20  105.06    9.90
   1   2 -19   78.58    7.14
  -1   2  19   78.89   12.84
   1  -2 -19   74.87    7.75
  -1  -2  19   84.05    9.08
   1   2 -18  100.31    7.54
  -1   2  18  114.76    9.10
   1  -2 -18  112.34    8.06
  -1  -2  18  103.43    9.06
   1   2 -17   23.11    8.01
  -1   2  17   39.79    6.87
   1  -2 -17   31.64    5.74
  -1  -2  17   30.22    6.58
   1   2 -16   63.57    5.58
  -1   2  16   60.82    9.77
   1  -2 -16   69.06    6.11
  -1  -2  16   68.86    6.83
   1   2 -15   51.13    5.14
  -1   2  15   59.47    5.92
   1  -2 -15   46.71    5.38
  -1  -2  15   65.93    6.07
   1   2 -14  320.41   13.80
  -1   2  14  344.45   12.34
   1  -2 -14  331.39   11.66
  -1  -2  14  303.02   12.24
   1   2 -13    3.25    3.45
  -1   2  13    3.30    4.13
   1  -2 -13   -0.53    3.65
  -1  -2  13    6.43    4.22
   1   2 -12  173.03    6.16
  -1   2  12  167.64    7.02
   1  -2 -12  180.41    6.66
  -1  -2  12  151.75    6.95
   1   2 -11  447.84   13.39
  -1   2  11  486.93   14.32
   1  -2 -11  480.89   14.01
  -1  -2  11  506.43   14.89
   1   2 -10    1.08    2.70
  -1   2  10    1.22    4.69
   1  -2 -10    2.77    4.53
  -1  -2  10   -1.42    3.17
   1   2  -9  210.63    6.16
  -1   2   9  217.07    6.71
   1  -2  -9  226.62    6.61
  -1  -2   9  214.49    8.62
   1   2  -8   24.57    3.80
  -1   2   8   26.66    2.95
   1  -2  -8   22.75    2.94
  -1  -2   8   25.72    2.94
   1   2  -7    4.33    2.11
  -1   2   7    2.77    2.31
   1  -2  -7    3.83    2.40
  -1  -2   7    8.80    3.75
   1   2  -6 1131.57   30.14
  -1   2   6 1088.31   30.55
   1  -2  -6 1095.81   32.72
  -1  -2   6 1087.59   30.62
   1   2  -5    2.28    1.70
  -1   2   5    0.45    2.05
   1  -2  -5    2.65    2.09
  -1  -2   5   -1.18    2.88
   1   2  -4    3.09    1.61
   1  -2  -4    1.18    2.94
  -1  -2   4    3.61    1.79
   1   2  -3  472.80   11.17
   1   2  -3  462.86   10.09
  -1   2   3  456.87    9.51
   1  -2  -3  434.54    9.32
   1   2  -2  229.69    6.09
   1   2  -2  228.47    3.66
  -1   2   2  250.15    5.08
   1  -2  -2  235.16    5.05
  -1  -2   2  237.23    6.02
   1   2  -1 3170.86  155.14
   1   2  -1 3259.35  133.82
  -1   2   1 3262.40  144.99
   1  -2  -1 3211.44  143.71
  -1  -2   1 3152.60  152.74
  -1  -2   1 3319.87  136.90
   1   2   0   18.57    2.83
  -1   2   0   21.61    1.79
   1   2   0   17.81    1.19
  -1  -2   0   23.30    4.54
   1  -2   0   20.32    2.02
  -1  -2   0   21.12    1.25
   1   2   1 1035.94   30.84
   1   2   1 1075.83   25.38
  -1   2  -1 1004.14   20.82
  -1  -2  -1 1042.51   31.23
  -1  -2  -1 1049.42   23.85
   1   2   2 4629.08  263.36
  -1   2  -2 4495.51  282.51
  -1  -2  -2 4790.22  270.98
   1   2   3 1492.74   43.24
  -1   2  -3 1470.45   48.09
   1  -2   3 1438.49   48.22
  -1  -2  -3 1460.66   42.29
   1   2   4   15.49    2.18
  -1   2  -4   15.23    4.23
   1  -2   4   18.69    3.13
  -1  -2  -4   16.09    2.14
   1   2   5   71.66    4.42
  -1   2  -5   72.01    3.77
   1  -2   5   63.34    3.99
  -1  -2  -5   63.23    2.95
   1   2   6   35.03    2.83
  -1   2  -6   40.80    3.40
   1  -2   6   31.01    3.62
  -1  -2  -6   27.07    2.71
   1   2   7  369.64    9.88
  -1   2  -7  340.57   10.03
   1  -2   7  381.29   13.34
  -1  -2  -7  371.53   11.22
  -1   2  -8   43.30    4.05
   1  -2   8   42.95    4.43
  -1  -2  -8   42.67    5.30
   1   2   9  118.86    5.47
  -1   2  -9  120.26    5.27
   1  -2   9  102.48    8.45
  -1  -2  -9  108.82    4.96
   1   2  10   28.34    4.24
  -1   2 -10   35.47    4.16
   1  -2  10   39.67    4.59
  -1  -2 -10   40.65    3.89
   1   2  11  279.08   13.08
  -1   2 -11  315.70   10.52
   1  -2  11  281.62   11.11
  -1  -2 -11  300.49    9.90
   1   2  12  189.91    8.92
  -1   2 -12  209.54    8.33
   1  -2  12  198.05    9.10
  -1  -2 -12  189.49    7.64
   1   2  13    7.62    5.03
  -1   2 -13   16.61    4.63
   1  -2  13   -0.76    5.27
  -1  -2 -13    6.14    4.23
   1   2  14  151.19    8.81
  -1   2 -14  166.64    8.45
   1  -2  14  142.89    9.34
  -1  -2 -14  158.52    7.86
   1   2  15  128.38    8.44
  -1   2 -15  112.79    7.42
   1  -2  15   99.39    8.64
  -1  -2 -15  124.63   10.79
   1   2  16  422.41   18.55
  -1   2 -16  424.00   16.98
   1  -2  16  408.13   18.99
  -1  -2 -16  393.57   20.72
   1   2  17  170.73   10.83
  -1   2 -17  171.96   13.21
   1  -2  17  145.86   11.42
  -1  -2 -17  148.69    9.37
   1   2  18   22.95   11.47
  -1   2 -18   17.95    6.27
   1  -2  18    3.84    7.85
  -1  -2 -18   14.30    6.14
   1   2  19   68.79    9.92
  -1   2 -19   63.37    8.15
   1  -2  19   72.45    9.97
  -1  -2 -19   73.87    7.93
   1   2  20   46.04    9.69
  -1   2 -20   75.69   12.30
   1  -2  20   58.63   10.12
  -1  -2 -20   44.30    7.96
   1   2  21   93.47   11.55
  -1   2 -21   77.39    9.20
   1  -2  21  101.54   12.00
  -1  -2 -21   85.50    9.82
   1   2  22   18.15   16.34
  -1   2 -22   32.09    8.29
   1  -2  22   16.83   10.60
  -1  -2 -22   40.39   12.66
   1   2  23    5.71   10.78
  -1   2 -23    5.91   12.58
   1  -2  23   19.84   16.04
  -1  -2 -23    2.36   12.96
   1   2  24  103.65   15.20
  -1   2 -24   93.65   11.35
   1  -2  24   92.89   22.83
  -1  -2 -24   87.78   12.05
   1   2  25    9.50   11.96
  -1   2 -25    0.09    9.17
   1  -2  25    6.73   12.15
  -1  -2 -25   11.87    9.13
   1   2  26   32.92   21.20
  -1   2 -26   41.06   10.82
   1  -2  26   44.42   14.97
  -1  -2 -26   36.64   11.58
   1   2  27   27.53   15.06
  -1   2 -27   29.34   16.81
   1  -2  27   27.78   15.06
  -1  -2 -27   40.01   11.59
   1   3 -27   20.29    9.64
  -1   3  27   37.44   12.92
   1  -3 -27   19.34   10.45
  -1  -3  27   26.85   20.15
   1   3 -26   55.35   14.48
  -1   3  26   41.60   13.09
   1  -3 -26   57.85   16.63
  -1  -3  26   34.69   13.31
   1   3 -25   46.25    9.24
  -1   3  25   40.03   12.70
   1  -3 -25   27.93   15.18
  -1  -3  25   55.09   12.72
   1   3 -24   79.28   10.04
  -1   3  24   72.68   18.42
   1  -3 -24   97.18   16.44
  -1  -3  24   93.67   13.42
   1   3 -23   13.36   11.09
  -1   3  23    4.66    9.58
   1  -3 -23   10.30    7.89
  -1  -3  23    3.53    9.55
   1   3 -22  172.71   12.00
  -1   3  22  229.17   15.12
   1  -3 -22  192.50   13.10
  -1  -3  22  181.78   15.37
   1   3 -21    1.09    6.42
  -1   3  21   -1.66    8.42
   1  -3 -21   18.97    7.24
  -1  -3  21    0.32    8.33
   1   3 -20  130.05   12.79
  -1   3  20  131.16   11.72
   1  -3 -20  119.37    9.78
  -1  -3  20  132.62   16.20
   1   3 -19   64.91    7.07
  -1   3  19   66.16    8.89
   1  -3 -19   62.43    7.53
  -1  -3  19   73.47   13.24
   1   3 -18   42.05    6.11
  -1   3  18   30.38    7.23
   1  -3 -18   41.10    6.46
  -1  -3  18   42.91   11.66
   1   3 -17   73.89    9.21
  -1   3  17   81.92    7.69
   1  -3 -17   67.08    7.01
  -1  -3  17   77.18   11.69
   1   3 -16    4.85    4.43
  -1   3  16   -1.03    8.37
   1  -3 -16    0.53    4.93
  -1  -3  16    6.97    8.83
   1   3 -15   57.56    5.43
  -1   3  15   54.66    6.32
   1  -3 -15   58.85    5.75
  -1  -3  15   56.87    9.39
   1   3 -14  424.42   14.42
  -1   3  14  409.95   19.38
   1  -3 -14  419.82   14.71
  -1  -3  14  445.86   16.33
   1   3 -13  105.40    5.74
  -1   3  13  107.23    6.43
   1  -3 -13  117.26    6.24
  -1  -3  13   95.96    6.68
   1   3 -12 1038.07   36.01
  -1   3  12 1118.60   43.73
   1  -3 -12 1082.97   42.32
  -1  -3  12 1062.73   39.02
   1   3 -11   -1.26    3.12
  -1   3  11    2.65    3.59
   1  -3 -11    0.31    3.59
  -1  -3  11    4.63    3.62
   1   3 -10  273.70    8.37
  -1   3  10  295.03    9.30
   1  -3 -10  305.64    9.21
  -1  -3  10  295.22    9.63
   1   3  -9   68.00    3.76
  -1   3   9   61.91    4.20
   1  -3  -9   62.73    5.63
  -1  -3   9   61.44    4.16
   1   3  -8   33.32    3.13
  -1   3   8   36.49    3.47
   1  -3  -8   34.91    3.40
  -1  -3   8   32.38    3.44
   1   3  -7   22.21    2.78
  -1   3   7   29.12    3.14
   1  -3  -7   30.86    4.66
  -1  -3   7   29.97    3.15
   1   3  -6   21.40    2.44
  -1   3   6   20.71    2.72
   1  -3  -6   15.59    2.75
  -1  -3   6   22.35    2.88
   1   3  -5  589.74   13.94
  -1   3   5  565.20   13.84
   1  -3  -5  572.25   14.31
   1   3  -4   93.64    6.09
   1   3  -4   93.11    3.39
  -1   3   4  107.63    4.86
   1  -3  -4   91.65    3.59
   1   3  -3    9.23    2.99
   1   3  -3    6.91    2.36
  -1   3   3    7.57    2.17
   1  -3  -3   10.19    3.33
   1   3  -2   10.78    2.95
   1   3  -2    2.78    1.35
  -1   3   2    2.10    3.23
   1  -3  -2   -0.37    2.07
  -1  -3   2    5.43    2.82
   1   3  -1   44.27    2.64
   1   3  -1   44.18    5.74
  -1   3   1   46.34    2.50
   1  -3  -1   44.17    2.73
  -1  -3   1   42.58    5.35
  -1  -3   1   43.10    1.90
   1  -3  -1   40.46    2.29
   1   3   0 3067.93  157.78
  -1   3   0 3122.46  135.63
   1   3   0 3076.82  133.26
  -1   3   0 3066.62  140.36
   1  -3   0 3230.21  153.30
   1  -3   0 3017.06  131.73
  -1  -3   0 3084.57  157.26
  -1  -3   0 3008.52  134.67
   1   3   1 2479.71  115.60
   1   3   1 2515.67   97.57
  -1   3  -1 2533.66   96.28
  -1   3  -1 2507.43  104.31
  -1  -3  -1 2534.78  117.79
  -1  -3  -1 2534.22  100.97
   1   3   2 1839.51   61.17
  -1   3  -2 1875.74   61.87
  -1  -3  -2 1845.26   76.53
  -1  -3  -2 1816.81   61.07
   1   3   3 1173.25   34.55
  -1   3  -3 1178.71   38.59
  -1  -3  -3 1160.23   34.09
   1   3   4   31.88    2.46
  -1   3  -4   26.79    5.32
  -1  -3  -4   33.05    3.68
   1   3   5   63.97    3.30
  -1   3  -5   69.29    4.23
  -1  -3  -5   67.72    3.22
   1   3   6  390.58   11.80
  -1   3  -6  376.66   11.24
   1  -3   6  359.40   14.98
  -1  -3  -6  377.08    9.58
   1   3   7  154.23    5.33
  -1   3  -7  147.16    6.01
   1  -3   7  141.33    6.59
  -1  -3  -7  134.95    5.08
   1   3   8  670.64   19.23
  -1   3  -8  684.70   20.69
   1  -3   8  663.82   21.75
  -1  -3  -8  617.13   18.05
   1   3   9   89.95    4.94
  -1   3  -9   81.56    5.32
   1  -3   9   91.38    6.13
  -1  -3  -9   90.70    4.90
   1   3  10  563.78   17.94
  -1   3 -10  562.03   18.00
   1  -3  10  536.23   19.26
  -1  -3 -10  562.06   17.28
   1   3  11   88.20    5.85
  -1   3 -11   96.24    8.44
   1  -3  11   90.62    6.73
  -1  -3 -11   75.38    5.26
   1   3  12    3.70    6.74
  -1   3 -12   -6.70    4.24
   1  -3  12    2.87    5.18
  -1  -3 -12    0.90    4.14
   1   3  13  139.81    8.03
  -1   3 -13  143.78    7.53
   1  -3  13  146.06   12.36
  -1  -3 -13  127.72    7.38
   1   3  14   57.30    6.47
  -1   3 -14   56.81    6.21
   1  -3  14   53.34   10.57
  -1  -3 -14   61.81    6.25
   1   3  15   98.19    8.14
  -1   3 -15  112.20    7.59
   1  -3  15   92.84    8.92
  -1  -3 -15   99.73    7.43
   1   3  16  153.72   10.27
  -1   3 -16  153.00    9.28
   1  -3  16  144.55   10.53
  -1  -3 -16  144.85    9.15
   1   3  17   62.31    8.19
   1  -3  17   42.50    8.68
  -1  -3 -17   43.58    6.85
   1   3  18  324.45   17.14
  -1   3 -18  329.09   15.50
   1  -3  18  302.67   18.01
  -1  -3 -18  323.53   15.84
   1   3  19   -1.74    7.64
  -1   3 -19   11.40    6.94
   1  -3  19   -5.37    8.45
  -1  -3 -19   -3.07    7.11
   1   3  20   92.22   11.36
  -1   3 -20  102.54    9.81
   1  -3  20   88.81   11.87
  -1  -3 -20   93.30    9.92
   1   3  21    7.08   14.08
  -1   3 -21   -0.84    7.72
   1  -3  21   -4.46    9.61
  -1  -3 -21   13.35    8.06
   1   3  22   49.72   11.54
  -1   3 -22   71.40   14.73
   1  -3  22   46.36   17.94
  -1  -3 -22   66.66    9.69
   1   3  23    6.80   10.60
  -1   3 -23    2.31    8.47
   1  -3  23    5.23   16.68
  -1  -3 -23    8.37    8.96
   1   3  24    6.05   17.51
  -1   3 -24   19.06    8.96
   1  -3  24    1.83   19.38
  -1  -3 -24   16.99   14.51
   1   3  25    5.11   12.52
  -1   3 -25   -2.64   14.26
   1  -3  25   22.41   13.18
  -1  -3 -25    7.80   10.01
   1   3  26   22.38   13.87
  -1   3 -26    8.24   10.17
   1  -3  26    3.02   14.12
  -1  -3 -26   18.24   11.12
   1   4 -27    9.28    9.35
  -1   4  27   17.11   13.57
   1  -4 -27    6.12   16.50
  -1  -4  27   31.95   20.17
   1   4 -26    4.83    8.77
  -1   4  26   11.80   18.96
   1  -4 -26    6.82    9.92
  -1  -4  26   16.95   12.92
   1   4 -25   45.42   14.31
  -1   4  25   58.62   12.83
   1  -4 -25   40.79   10.80
  -1  -4  25   40.95   13.47
   1   4 -24    4.48    7.69
  -1   4  24   -4.00   10.54
   1  -4 -24   -0.39    9.00
  -1  -4  24    6.49   10.78
   1   4 -23  130.73   11.01
  -1   4  23  142.06   20.80
   1  -4 -23  125.08   12.55
  -1  -4  23  125.01   14.63
   1   4 -22   -5.19   10.40
  -1   4  22   14.93    9.43
   1  -4 -22    5.41    7.88
  -1  -4  22    6.34    9.49
   1   4 -21   99.56    9.16
  -1   4  21   99.34   11.46
   1  -4 -21   84.91    9.59
  -1  -4  21   76.13   11.44
   1   4 -20    3.48    6.42
  -1   4  20    7.56    7.87
   1  -4 -20    5.98    7.17
  -1  -4  20   10.33    8.23
   1   4 -19  109.62   12.01
  -1   4  19  110.22   10.35
   1  -4 -19   98.44    9.16
  -1  -4  19  108.01   10.62
   1   4 -18   11.00    5.32
  -1   4  18   17.58   10.41
   1  -4 -18   -3.55    6.22
  -1  -4  18   -1.83    7.18
   1   4 -17   20.11    7.78
  -1   4  17    6.28    6.35
   1  -4 -17    4.65    5.78
  -1  -4  17    6.82    6.69
   1   4 -16   12.15    4.89
  -1   4  16   -3.26    6.01
   1  -4 -16   -8.18    5.69
  -1  -4  16    7.00    6.14
   1   4 -15  500.88   21.38
  -1   4  15  464.48   18.03
   1  -4 -15  445.31   17.67
  -1  -4  15  428.91   23.67
   1   4 -14    7.28    4.38
  -1   4  14    0.33    5.08
   1  -4 -14   -3.56    7.10
  -1  -4  14    5.27    8.32
   1   4 -13  435.05   17.79
  -1   4  13  458.72   16.29
   1  -4 -13  467.04   19.63
  -1  -4  13  415.45   16.67
   1   4 -12   37.04    4.31
  -1   4  12   35.61    4.98
   1  -4 -12   20.34    4.78
  -1  -4  12   33.98    5.19
   1   4 -11  648.75   19.54
  -1   4  11  610.57   20.08
   1  -4 -11  576.07   19.71
  -1  -4  11  592.04   25.30
   1   4 -10  272.07   11.19
  -1   4  10  280.52   11.91
   1  -4 -10  278.51   11.92
  -1  -4  10  270.95    9.93
   1   4  -9   78.06    6.23
  -1   4   9   81.09    4.79
   1  -4  -9   77.88    4.70
  -1  -4   9   74.40    5.36
   1   4  -8    9.21    4.60
  -1   4   8    6.35    3.37
   1  -4  -8    7.71    3.28
   1   4  -7  168.58    5.68
  -1   4   7  158.71    5.88
   1  -4  -7  151.66    5.69
   1   4  -6    7.72    3.56
   1   4  -6   -2.38    2.76
  -1   4   6    7.13    2.94
   1  -4  -6    1.16    4.54
   1   4  -5  441.17   13.75
   1   4  -5  447.83   12.06
  -1   4   5  447.82   11.69
   1  -4  -5  427.55   13.99
   1   4  -4   26.92    5.61
   1   4  -4   32.48    3.37
  -1   4   4   21.83    2.82
   1  -4  -4   26.66    3.00
   1   4  -3   70.72    4.70
   1   4  -3   68.72    2.69
  -1   4   3   67.91    3.48
   1  -4  -3   73.20    5.10
   1   4  -2   44.18    2.37
   1   4  -2   42.55    4.47
  -1   4   2   48.55    4.36
   1  -4  -2   44.36    3.33
  -1  -4   2   43.14    5.64
   1  -4  -2   43.04    3.07
   1   4  -1  455.69   16.58
  -1   4   1  434.30   10.48
   1   4  -1  434.52    9.30
   1  -4  -1  415.41   10.10
  -1  -4   1  414.76   14.76
   1  -4  -1  412.43   10.55
   1   4   0   26.59    6.24
   1   4   0   40.72    3.41
  -1   4   0   38.45    2.85
   1  -4   0   35.59    2.28
   1  -4   0   42.11    4.57
  -1  -4   0   38.05    6.20
  -1  -4   0   40.74    3.45
   1   4   1  805.07   26.36
   1   4   1  808.78   19.81
  -1   4  -1  840.16   20.69
  -1   4  -1  792.54   21.37
   1  -4   1  786.65   19.99
  -1  -4  -1  806.07   26.45
  -1  -4  -1  779.04   19.66
   1   4   2  525.34   12.30
  -1   4  -2  521.96   12.08
  -1   4  -2  529.62   13.50
  -1  -4  -2  506.88   17.18
  -1  -4  -2  499.31   13.83
   1   4   3  167.04    6.18
  -1   4  -3  156.35    4.45
  -1   4  -3  150.37    5.22
  -1  -4  -3  157.77    7.93
  -1  -4  -3  163.73    6.23
   1   4   4  210.92    7.39
  -1   4  -4  208.94    8.13
  -1   4  -4  213.37    5.68
  -1  -4  -4  203.47    7.34
  -1  -4  -4  200.29    9.67
   1   4   5   36.03    4.63
  -1   4  -5   34.58    4.34
  -1  -4  -5   28.96    3.00
   1   4   6   51.62    3.73
  -1   4  -6   60.69    4.85
  -1  -4  -6   49.09    3.64
   1   4   7  375.24   10.84
  -1   4  -7  396.65   12.92
  -1  -4  -7  397.03   13.46
   1   4   8   -0.07    5.10
  -1   4  -8    0.58    3.90
   1  -4   8   -0.07    4.57
  -1  -4  -8    0.20    3.24
   1   4   9  897.09   28.70
  -1   4  -9  921.43   31.35
   1  -4   9  845.07   38.25
  -1  -4  -9  815.17   26.95
   1   4  10    4.16    3.99
  -1   4 -10   25.26    6.66
   1  -4  10    0.88    5.28
  -1  -4 -10    7.37    5.82
   1   4  11   90.71    6.00
  -1   4 -11   89.83    6.40
   1  -4  11   92.89    7.71
  -1  -4 -11   92.48    5.85
   1   4  12   10.76    4.79
  -1   4 -12   11.67    4.86
   1  -4  12   15.84    8.80
  -1  -4 -12    3.49    4.53
   1   4  13  108.96    7.30
  -1   4 -13  113.91   10.26
   1  -4  13   99.78    8.77
  -1  -4 -13  108.29    6.98
   1   4  14   14.18    8.79
  -1   4 -14   17.14    5.57
   1  -4  14   11.63    6.84
  -1  -4 -14   17.46    5.30
   1   4  15   56.58    7.24
  -1   4 -15   53.68    6.68
   1  -4  15   44.95    8.19
  -1  -4 -15   45.82    6.19
   1   4  16    7.26    6.54
  -1   4 -16   10.44    5.75
   1  -4  16    0.47    7.34
  -1  -4 -16   -1.32    5.83
   1   4  17   50.79   12.68
  -1   4 -17   54.41    7.48
   1  -4  17   40.52   14.24
  -1  -4 -17   55.95    7.70
   1   4  18   -0.49    7.69
  -1   4 -18    6.41    6.73
   1  -4  18   27.01   12.85
  -1  -4 -18   -2.90    6.97
   1   4  19  205.19   14.95
  -1   4 -19  199.56   17.47
   1  -4  19  210.92   22.43
  -1  -4 -19  222.02   13.34
   1   4  20    8.66   14.01
  -1   4 -20    6.35    7.52
   1  -4  20   21.99   14.63
  -1  -4 -20    7.68    7.62
   1   4  21  115.46   12.99
  -1   4 -21   87.53   10.60
   1  -4  21  115.53   20.20
  -1  -4 -21   98.07   10.88
   1   4  22    2.41   10.32
  -1   4 -22   -4.50    8.00
   1  -4  22   19.89   16.60
  -1  -4 -22   15.70    8.27
   1   4  23   -6.77   16.85
  -1   4 -23   10.87    8.82
   1  -4  23   19.55   18.95
  -1  -4 -23   18.24    9.21
   1   4  24    5.95   12.03
  -1   4 -24   21.71   14.40
   1  -4  24   13.98   20.26
  -1  -4 -24   11.69    9.70
   1   4  25   -1.60   12.63
  -1   4 -25   -5.01    9.37
   1  -4  25   27.33   13.28
  -1  -4 -25    4.48   15.55
   1   4  26   33.95   21.01
  -1   4 -26    6.15   10.25
   1  -4  26   24.39   14.82
  -1  -4 -26   19.26   16.95
   1   5 -26   35.63   14.60
  -1   5  26   20.67   14.15
   1  -5 -26   26.53   11.40
  -1  -5  26   27.36   21.41
   1   5 -25   10.56    9.19
  -1   5  25   32.78   19.05
   1  -5 -25   29.57   10.61
  -1  -5  25   24.04   19.77
   1   5 -24   34.54    9.03
  -1   5  24   32.99   12.47
   1  -5 -24   49.47   10.80
  -1  -5  24   28.13   12.38
   1   5 -23    9.73    8.05
  -1   5  23    2.93   10.67
   1  -5 -23   11.12    9.09
  -1  -5  23   15.95   10.71
   1   5 -22   88.74    9.72
  -1   5  22   94.20   17.48
   1  -5 -22   83.06   10.98
  -1  -5  22   65.36   12.63
   1   5 -21   22.88   10.27
  -1   5  21    1.45    8.84
   1  -5 -21   -8.60    8.16
  -1  -5  21   14.32    9.31
   1   5 -20   80.91    8.36
  -1   5  20   71.34   10.30
   1  -5 -20   80.61    9.99
  -1  -5  20   69.32   16.60
   1   5 -19   34.28    9.90
  -1   5  19   29.95    8.08
   1  -5 -19   11.63    7.68
  -1  -5  19   19.69   12.95
   1   5 -18   13.57    6.20
  -1   5  18   23.42    8.09
   1  -5 -18   20.16    6.98
  -1  -5  18   14.46   12.57
   1   5 -17   28.49    6.03
  -1   5  17   21.66   11.28
   1  -5 -17   18.81    6.80
  -1  -5  17   40.89    8.09
   1   5 -16    7.24    5.30
  -1   5  16    9.66    6.62
   1  -5 -16   14.33    6.07
  -1  -5  16   13.36    6.96
   1   5 -15   -0.79    4.72
  -1   5  15    2.20    8.89
   1  -5 -15   -5.15    5.71
  -1  -5  15    5.02    6.18
   1   5 -14  389.68   13.87
  -1   5  14  347.94   14.89
   1  -5 -14  326.96   19.07
  -1  -5  14  353.35   20.91
   1   5 -13   -2.21    6.86
  -1   5  13   -0.65    7.54
   1  -5 -13    1.23    5.07
  -1  -5  13    6.22    5.93
   1   5 -12  656.71   21.76
  -1   5  12  600.03   22.11
   1  -5 -12  618.12   21.97
  -1  -5  12  599.90   23.89
   1   5 -11   68.10    5.14
  -1   5  11   72.00    5.61
   1  -5 -11   60.94    5.66
   1   5 -10  232.52    8.44
  -1   5  10  217.25    8.69
   1  -5 -10  209.74   11.33
   1   5  -9   72.57    4.87
  -1   5   9   74.48    5.41
   1  -5  -9   73.26    5.25
   1   5  -8   92.38    6.23
   1   5  -8   90.83    5.08
  -1   5   8   96.19    5.23
   1  -5  -8   88.80    7.71
   1   5  -7   37.83    4.97
   1   5  -7   34.44    3.90
  -1   5   7   38.58    5.81
   1  -5  -7   36.13    4.06
   1   5  -6   34.62    4.83
   1   5  -6   29.27    5.70
  -1   5   6   36.79    3.81
   1  -5  -6   26.31    3.74
   1   5  -5   25.60    4.75
   1   5  -5   34.00    2.94
   1   5  -5   26.97    3.98
  -1   5   5   27.34    3.47
   1  -5  -5   19.97    5.49
   1   5  -4  415.77   13.36
   1   5  -4  400.36    9.73
  -1   5   4  390.70   10.80
   1  -5  -4  368.03   10.95
   1   5  -3   24.54    6.99
   1   5  -3   18.49    3.71
  -1   5   3   32.92    3.40
   1  -5  -3   31.40    3.97
   1  -5  -3   26.58    3.43
  -1  -5   3   27.17    3.88
   1   5  -2  996.07   27.19
   1   5  -2  945.47   33.89
  -1   5   2  950.38   28.54
   1  -5  -2  978.92   30.57
  -1  -5   2  921.95   35.37
   1  -5  -2  935.23   28.48
   1   5  -1   61.06    8.00
   1   5  -1   54.19    3.04
  -1   5   1   56.30    5.53
   1  -5  -1   55.68    3.55
   1  -5  -1   59.77    5.72
  -1  -5   1   56.72    4.77
  -1  -5   1   55.46    3.20
   1   5   0 1110.29   40.93
   1   5   0 1089.75   34.22
  -1   5   0 1090.85   36.18
   1  -5   0 1118.08   34.79
   1  -5   0 1093.23   34.92
  -1  -5   0 1031.26   37.95
  -1  -5   0 1052.22   33.67
   1   5   1  170.59    5.07
  -1   5  -1  182.88    7.37
  -1   5  -1  177.94    5.77
   1  -5   1  175.70    6.25
  -1  -5  -1  176.38    8.13
  -1  -5  -1  181.05    5.29
   1   5   2   41.34    3.10
  -1   5  -2   39.24    3.06
  -1   5  -2   48.93    3.52
  -1  -5  -2   37.47    5.60
  -1  -5  -2   44.68    3.23
   1   5   3  146.52    4.99
  -1   5  -3  145.84    5.09
  -1   5  -3  157.37    5.76
  -1  -5  -3  152.38    8.75
  -1  -5  -3  150.86    5.17
   1   5   4   52.68    3.58
  -1   5  -4   51.73    5.12
  -1   5  -4   46.88    3.93
  -1  -5  -4   49.45    6.56
  -1  -5  -4   50.17    3.58
   1   5   5  233.54    9.32
  -1   5  -5  244.62    9.55
  -1   5  -5  241.84    7.33
  -1  -5  -5  232.61    7.34
  -1  -5  -5  217.22   11.65
   1   5   6  116.41    5.08
  -1   5  -6  109.75    6.53
  -1  -5  -6  106.58    7.10
   1   5   7   42.74    3.99
  -1   5  -7   51.03    5.35
  -1  -5  -7   42.95    4.06
   1   5   8  454.62   14.19
  -1   5  -8  444.85   15.72
  -1  -5  -8  429.73   16.37
   1   5   9    5.51    3.85
  -1   5  -9    1.50    4.68
  -1  -5  -9   -1.79    3.98
   1   5  10  314.09   11.28
  -1   5 -10  334.60   16.15
  -1  -5 -10  297.32   11.02
   1   5  11    7.80    6.82
  -1   5 -11    2.06    5.01
  -1  -5 -11   -3.37    6.53
   1   5  12   51.06    6.08
  -1   5 -12   52.54    6.20
   1  -5  12   64.05    8.04
  -1  -5 -12   55.27    5.82
   1   5  13   37.76    6.28
  -1   5 -13   39.55    6.28
   1  -5  13   29.70    8.20
  -1  -5 -13   36.87    5.72
   1   5  14   83.58    7.79
  -1   5 -14   87.20    7.79
   1  -5  14   92.72   13.71
  -1  -5 -14   89.46    7.55
   1   5  15   64.98    7.76
  -1   5 -15   60.40    7.68
   1  -5  15   75.53    9.41
  -1  -5 -15   63.98    7.26
   1   5  16   51.02   11.64
  -1   5 -16   73.16   11.27
   1  -5  16   49.56    9.39
  -1  -5 -16   44.83    7.59
   1   5  17   26.02    7.48
  -1   5 -17   20.42    6.97
   1  -5  17   16.36    9.53
  -1  -5 -17   27.52    6.91
   1   5  18  109.26   11.04
  -1   5 -18  129.08   14.78
   1  -5  18  121.70   12.96
  -1  -5 -18  106.68   10.32
   1   5  19   -8.44    9.31
  -1   5 -19    4.69    7.34
   1  -5  19    9.15    9.89
  -1  -5 -19    9.86    7.17
   1   5  20   72.62   12.06
  -1   5 -20   92.89   10.26
   1  -5  20   92.77   13.65
  -1  -5 -20   80.15   10.18
   1   5  21   17.31   10.33
  -1   5 -21   22.73    8.44
   1  -5  21   14.91   18.01
  -1  -5 -21   15.73    8.88
   1   5  22   16.49   10.87
  -1   5 -22   21.39    8.74
   1  -5  22   14.85   18.65
  -1  -5 -22   11.40    9.59
   1   5  23   35.46   11.91
  -1   5 -23   32.66   14.84
   1  -5  23   14.83   21.01
  -1  -5 -23   22.69   10.53
   1   5  24    5.88   13.01
  -1   5 -24   28.46   10.06
   1  -5  24   40.56   22.10
  -1  -5 -24   27.38   10.59
   1   5  25  -12.61   20.89
  -1   5 -25    2.74   10.03
   1  -5  25   29.97   14.48
  -1  -5 -25    8.52   10.51
   1   6 -25   28.46   13.58
  -1   6  25    9.73   12.66
   1  -6 -25    1.91   10.84
  -1  -6  25   23.24   21.16
   1   6 -24   -1.03    8.54
  -1   6  24   10.47   11.80
   1  -6 -24   -1.37    9.82
  -1  -6  24   17.19   19.06
   1   6 -23   36.80    8.86
  -1   6  23   22.25   11.37
   1  -6 -23   28.29   10.41
  -1  -6  23   49.21   19.73
   1   6 -22    6.34    7.57
  -1   6  22   -6.90    9.99
   1  -6 -22   11.97    8.87
  -1  -6  22   -5.95   17.24
   1   6 -21   29.64    7.73
  -1   6  21   21.64   16.20
   1  -6 -21   34.10    9.27
  -1  -6  21   37.98   17.31
   1   6 -20   25.77   11.74
  -1   6  20   30.54    9.71
   1  -6 -20   36.79    8.78
  -1  -6  20   27.08   10.85
   1   6 -19   24.67    7.06
  -1   6  19   28.67    9.15
   1  -6 -19   14.91    8.20
  -1  -6  19   34.37    9.81
   1   6 -18   14.18   10.41
  -1   6  18   38.19   12.54
   1  -6 -18   24.02    7.51
  -1  -6  18   25.48    9.14
   1   6 -17   22.24    6.31
  -1   6  17   24.14    7.48
   1  -6 -17   11.35    7.34
  -1  -6  17   27.06    8.60
   1   6 -16   73.94   10.72
  -1   6  16   62.22   12.27
   1  -6 -16   68.85    8.44
   1   6 -15   59.73    6.43
  -1   6  15   39.99    7.67
   1  -6 -15   46.49    7.41
   1   6 -14   88.78    7.09
  -1   6  14   78.22   11.71
   1  -6 -14   89.84   11.21
   1   6 -13  291.10   15.43
  -1   6  13  251.88   12.30
   1  -6 -13  253.91   11.92
   1   6 -12   19.63    4.99
  -1   6  12   12.21    8.47
   1  -6 -12   18.37    5.86
   1   6 -11  365.96   13.72
  -1   6  11  387.73   14.70
   1  -6 -11  406.33   15.10
   1   6 -10  251.22   12.14
   1   6 -10  244.03    9.99
  -1   6  10  257.71   10.24
   1  -6 -10  257.21   10.46
   1   6  -9  218.23   10.98
   1   6  -9  218.82    8.79
  -1   6   9  225.49   11.97
   1  -6  -9  214.92    9.16
   1   6  -8  150.38   12.11
   1   6  -8  170.64    7.50
  -1   6   8  164.76    7.40
   1  -6  -8  158.59   10.11
   1   6  -7    4.03    7.46
   1   6  -7    2.19    3.11
   1   6  -7    7.51    4.03
  -1   6   7    7.00    3.94
   1  -6  -7    3.45    4.08
   1   6  -6   54.32    8.75
   1   6  -6   64.31    3.88
   1   6  -6   47.43    5.15
  -1   6   6   71.48    7.03
   1  -6  -6   69.72    5.09
   1   6  -5  297.76   15.11
   1   6  -5  293.99    8.44
  -1   6   5  292.13    9.61
   1  -6  -5  303.70   12.29
   1  -6  -5  302.27   12.48
   1   6  -4   21.09    7.60
   1   6  -4   16.67    2.78
  -1   6   4   17.51    3.64
   1  -6  -4   19.15    7.20
   1  -6  -4   15.32    3.81
   1   6  -3   89.59    5.38
   1   6  -3   84.86    6.58
  -1   6   3   88.52    4.83
   1  -6  -3   85.05    5.65
  -1  -6   3   82.91    5.64
   1  -6  -3   81.17    4.92
   1   6  -2    9.32    4.84
  -1   6   2   10.06    3.36
   1   6  -2   14.20    4.05
   1  -6  -2    9.87    5.63
  -1  -6   2   11.91    6.31
   1  -6  -2    4.31    3.62
   1   6  -1  214.40   13.32
   1   6  -1  228.10    8.16
  -1   6   1  222.84    7.48
   1  -6  -1  220.16    7.48
   1  -6  -1  230.83    8.02
  -1  -6   1  231.82    9.30
  -1  -6   1  219.95    8.94
   1   6   0  143.87    7.93
   1   6   0  150.31    5.08
  -1   6   0  158.55    5.82
   1  -6   0  149.56    7.07
   1  -6   0  138.37    6.33
  -1  -6   0  139.85    7.35
  -1  -6   0  128.76    5.04
   1   6   1  222.47    6.73
  -1   6  -1  228.60    9.83
  -1   6  -1  237.44    7.77
   1  -6   1  217.01    8.34
  -1  -6  -1  223.07   13.42
  -1  -6  -1  217.08    6.91
   1   6   2  627.84   20.17
  -1   6  -2  641.10   21.65
  -1   6  -2  639.56   18.95
  -1  -6  -2  603.86   23.38
  -1  -6  -2  619.57   17.97
   1   6   3   24.32    5.03
  -1   6  -3   19.02    3.35
  -1   6  -3   19.62    3.71
  -1  -6  -3   13.38    5.96
  -1  -6  -3   19.08    3.43
   1   6   4 1077.22   35.48
  -1   6  -4 1077.41   36.37
  -1   6  -4 1057.27   41.73
  -1  -6  -4 1091.83   47.37
  -1  -6  -4 1099.74   36.63
   1   6   5  310.74    9.83
  -1   6  -5  327.38   13.42
  -1   6  -5  312.84   12.39
  -1  -6  -5  296.98   12.50
  -1  -6  -5  316.54   15.19
   1   6   6  152.24    6.46
  -1   6  -6  152.21    6.37
  -1   6  -6  149.91    6.81
  -1   6  -6  157.59    8.86
  -1  -6  -6  148.03   15.37
  -1  -6  -6  144.11    6.45
   1   6   7  230.70   11.80
  -1   6  -7  258.03   11.16
  -1   6  -7  243.64    8.91
  -1  -6  -7  238.36    8.82
  -1  -6  -7  231.26   14.28
   1   6   8    0.30    4.01
  -1   6  -8    0.52    3.92
  -1   6  -8    8.00    5.19
  -1  -6  -8   -5.56    4.16
   1   6   9  334.48   12.30
  -1   6  -9  327.35   13.66
  -1  -6  -9  336.33   15.37
   1   6  10   45.59    5.48
  -1   6 -10   32.93    6.08
  -1  -6 -10   34.88    5.22
   1   6  11  121.30    7.46
  -1   6 -11  118.07   12.05
  -1  -6 -11  120.14    7.29
   1   6  12  266.21   11.92
  -1   6 -12  268.08   13.02
  -1  -6 -12  240.37   15.55
   1   6  13  124.69    8.69
  -1   6 -13  143.35    9.38
  -1  -6 -13  123.02    8.71
   1   6  14   32.17    7.01
  -1   6 -14   44.35   10.36
  -1  -6 -14   25.17    6.48
   1   6  15   -6.09   10.49
  -1   6 -15    3.94    6.60
  -1  -6 -15    2.63    6.26
   1   6  16   40.73    8.22
  -1   6 -16   40.66    7.60
  -1  -6 -16   25.93    7.27
   1   6  17   15.77   11.59
  -1   6 -17    2.63    7.07
   1  -6  17    5.43    9.10
  -1  -6 -17    5.31    7.17
   1   6  18    5.71    8.57
  -1   6 -18    6.40    7.54
   1  -6  18   19.69   10.64
  -1  -6 -18    7.40    7.58
   1   6  19   82.64   11.41
  -1   6 -19   92.51   10.01
   1  -6  19   74.53   13.49
  -1  -6 -19   73.91   10.65
   1   6  20  -10.56   14.18
  -1   6 -20    8.45    8.19
   1  -6  20   19.04   11.42
  -1  -6 -20    7.33    8.50
   1   6  21   16.72   11.28
  -1   6 -21   35.70    9.51
   1  -6  21   28.65   13.18
  -1  -6 -21   30.44    9.83
   1   6  22    5.56   11.11
  -1   6 -22   -1.45   13.37
   1  -6  22    9.40   12.86
  -1  -6 -22    3.99    9.22
   1   6  23   23.94   18.09
  -1   6 -23   23.18    9.51
   1  -6  23    4.73   13.87
  -1  -6 -23    5.88   10.25
   1   6  24   30.22   13.51
  -1   6 -24   23.09   16.73
   1  -6  24   34.72   16.35
  -1  -6 -24   39.88   11.98
   1   7 -24    5.67    8.95
  -1   7  24    4.03   11.84
   1  -7 -24   23.03   16.88
   1   7 -23   15.65    8.53
  -1   7  23   11.55   11.48
   1  -7 -23   13.03   16.15
   1   7 -22   17.61    8.21
  -1   7  22   14.68   16.65
   1  -7 -22    6.54   15.03
   1   7 -21   13.49   12.48
  -1   7  21   11.42    9.69
   1  -7 -21   20.42   14.78
   1   7 -20   20.21    8.05
  -1   7  20   18.69   10.04
   1  -7 -20   14.75   14.18
   1   7 -19   59.95   12.46
  -1   7  19   64.32   15.60
   1  -7 -19   39.23    9.90
   1   7 -18    4.67    6.70
  -1   7  18   -1.08    8.64
   1  -7 -18    9.67    7.95
   1   7 -17  153.08   10.19
  -1   7  17  129.93   17.10
   1  -7 -17  138.71   11.54
   1   7 -16   -1.97    6.10
  -1   7  16    0.56    7.19
   1  -7 -16   13.99    7.34
   1   7 -15  172.36   10.34
  -1   7  15  152.91   10.79
   1  -7 -15  167.79   11.49
   1   7 -14   16.48    8.52
   1   7 -14   26.97    9.94
  -1   7  14   36.46    7.07
   1  -7 -14   29.27   10.47
   1   7 -13   63.02    9.19
   1   7 -13   74.44    6.91
  -1   7  13   63.38    7.90
   1  -7 -13   83.19    7.90
   1   7 -12   22.42   11.27
   1   7 -12    6.84    5.36
  -1   7  12    6.62    5.64
   1  -7 -12    6.55    5.91
   1   7 -11   12.95    6.69
   1   7 -11    5.23    5.29
  -1   7  11   18.37    8.38
   1  -7 -11    9.14    5.59
   1   7 -10    3.57   10.05
   1   7 -10    5.47    7.67
  -1   7  10    7.90    5.07
   1  -7 -10    7.82    5.42
   1   7  -9  265.62   13.07
   1   7  -9  259.65    9.54
   1   7  -9  277.54   15.36
  -1   7   9  263.39   10.81
   1  -7  -9  251.52   11.06
   1   7  -8    7.86    5.89
   1   7  -8    1.42    3.81
   1   7  -8    6.97    7.65
  -1   7   8   -4.65    4.71
   1  -7  -8    8.01    7.26
   1   7  -7  168.22    9.73
   1   7  -7  161.94    6.64
   1   7  -7  169.91   12.01
  -1   7   7  174.88    7.98
   1  -7  -7  166.07   10.99
   1  -7  -7  173.69    8.29
   1   7  -6    6.50    5.80
   1   7  -6   12.92    5.05
   1   7  -6    5.78    7.58
  -1   7   6   -4.92    4.33
   1  -7  -6    2.74    6.08
   1  -7  -6   -0.34    4.33
   1   7  -5   73.50    7.56
   1   7  -5   88.52    6.63
  -1   7   5   83.07    5.88
   1  -7  -5  104.51    7.76
   1  -7  -5   94.60    6.08
   1   7  -4   42.49    3.72
   1   7  -4   47.44    6.44
  -1   7   4   44.43    4.70
   1  -7  -4   34.20    4.77
   1  -7  -4   52.45    5.81
   1   7  -3  109.52    8.43
  -1   7   3  132.36    6.36
   1   7  -3  134.38    5.48
   1  -7  -3  130.50    7.20
  -1  -7   3  129.20    7.25
   1  -7  -3  137.85    6.90
   1   7  -2    3.87    5.24
  -1   7   2    0.34    3.71
   1   7  -2    3.50    3.09
   1  -7  -2    8.59    6.12
  -1  -7   2    2.85    4.66
   1  -7  -2   14.13    6.41
   1   7  -1    0.26    5.57
   1   7  -1   -0.51    3.11
  -1   7   1   -3.44    5.65
   1  -7  -1    1.78    3.67
   1  -7  -1   -3.99    4.21
  -1  -7   1    5.80    4.78
  -1  -7   1    1.70    3.41
   1   7   0  258.40    8.22
  -1   7   0  244.91    8.83
   1  -7   0  255.89    8.52
   1  -7   0  251.56    9.59
  -1  -7   0  260.13   14.90
  -1  -7   0  238.95    8.63
   1   7   1  114.34    5.10
  -1   7  -1  110.05    5.95
   1  -7   1  108.62    4.98
  -1  -7  -1  117.37    8.09
  -1  -7  -1  120.80    5.66
   1   7   2   49.73    6.24
  -1   7  -2   43.56    4.67
  -1   7  -2   46.06    4.57
  -1  -7  -2   55.16    6.83
  -1  -7  -2   46.76    4.46
   1   7   3  652.30   24.27
  -1   7  -3  646.14   24.84
  -1   7  -3  697.70   22.34
  -1  -7  -3  673.72   28.37
  -1  -7  -3  667.66   21.66
   1   7   4   40.17    4.42
  -1   7  -4   42.54    4.75
  -1   7  -4   28.76    7.90
  -1  -7  -4   35.58    7.73
  -1  -7  -4   36.71    4.64
   1   7   5  795.09   26.78
  -1   7  -5  777.46   31.01
  -1   7  -5  790.02   27.56
  -1   7  -5  839.49   34.31
  -1  -7  -5  785.24   44.78
  -1  -7  -5  806.77   31.91
   1   7   6   -1.51    6.37
  -1   7  -6    8.06    4.34
  -1   7  -6    8.29    4.50
  -1   7  -6    6.25    6.10
  -1  -7  -6   10.62   11.60
  -1  -7  -6    5.81    4.32
   1   7   7   30.90    4.84
  -1   7  -7   33.81    4.98
  -1   7  -7   31.34    7.50
  -1   7  -7   25.45    6.24
  -1  -7  -7   37.44    9.04
  -1  -7  -7   30.63    7.28
   1   7   8   75.77    5.91
  -1   7  -8   82.53    6.15
  -1   7  -8   70.69    6.16
  -1   7  -8   86.21   11.30
  -1  -7  -8   83.02   16.17
  -1  -7  -8   76.69    6.14
   1   7   9  113.45    7.06
  -1   7  -9   96.56   12.73
  -1   7  -9  107.98    7.43
  -1  -7  -9  121.67   10.53
  -1  -7  -9  113.48   12.47
   1   7  10   70.18    6.78
  -1   7 -10   55.94    9.57
  -1   7 -10   61.58    7.53
  -1  -7 -10   52.04    6.28
   1   7  11  241.62   11.28
  -1   7 -11  228.39   11.56
  -1   7 -11  236.06   12.74
  -1  -7 -11  226.12   11.34
   1   7  12  105.19    8.50
  -1   7 -12   92.03   13.23
  -1  -7 -12  100.30    8.11
   1   7  13  294.56   14.28
  -1   7 -13  274.99   14.80
  -1  -7 -13  261.25   18.14
   1   7  14   26.46    7.16
  -1   7 -14   21.00    7.08
  -1  -7 -14   12.25    6.79
   1   7  15  131.75   10.82
  -1   7 -15  146.81   15.61
  -1  -7 -15  133.34   10.17
   1   7  16   37.94   13.04
  -1   7 -16   36.86    8.35
  -1  -7 -16   42.03    7.96
   1   7  17   33.72    9.32
  -1   7 -17   32.32    8.55
  -1  -7 -17   38.30    8.34
   1   7  18   62.69   10.59
  -1   7 -18   48.80    9.79
  -1  -7 -18   53.35    9.63
   1   7  19   -2.27    9.38
  -1   7 -19    4.65    8.10
  -1  -7 -19   -5.72    8.36
   1   7  20    2.41   10.39
  -1   7 -20    7.48    8.89
  -1  -7 -20    5.91    9.15
   1   7  21   23.19   17.07
  -1   7 -21   17.93    9.62
  -1  -7 -21   20.09    9.23
   1   7  22    0.08   11.62
  -1   7 -22   -3.99    9.68
  -1  -7 -22    2.42    9.54
   1   7  23   51.47   14.14
  -1   7 -23   57.91   16.54
  -1  -7 -23   29.95   12.00
   1   8 -23   -0.01    8.84
  -1   8  23   18.31   12.30
   1  -8 -23   13.62   11.31
   1   8 -22    8.54   13.48
  -1   8  22   -1.66   11.46
   1  -8 -22    2.41   10.47
   1   8 -21    6.83    8.26
  -1   8  21    7.85   10.97
   1  -8 -21    0.43    9.65
   1   8 -20   44.20   13.51
  -1   8  20   16.76   16.46
   1  -8 -20   38.97   16.12
   1   8 -19   10.27   10.92
   1   8 -19    8.31    7.57
  -1   8  19    0.26    9.29
   1  -8 -19    9.10   14.35
   1   8 -18   84.90   13.25
   1   8 -18   76.00   13.87
  -1   8  18   94.16   11.42
   1  -8 -18   80.15   16.78
   1   8 -17   17.90   10.30
   1   8 -17   18.89    7.20
  -1   8  17   15.00    8.79
   1  -8 -17   12.70    8.29
   1   8 -16  170.65   21.86
   1   8 -16  179.74   12.05
  -1   8  16  187.25   14.17
   1  -8 -16  207.31   13.66
   1   8 -15    3.50    9.26
   1   8 -15    2.35   10.11
  -1   8  15   13.59    7.59
   1  -8 -15   -0.41    7.55
   1   8 -14   84.20   11.72
   1   8 -14  112.83    8.83
  -1   8  14  105.75    9.98
   1  -8 -14  102.94    9.71
   1   8 -13    2.79   12.41
   1   8 -13   -2.36    6.20
  -1   8  13    9.48    6.54
   1  -8 -13   13.04   10.40
   1   8 -12   20.89    8.63
   1   8 -12   30.93    5.49
   1   8 -12   23.76    9.75
  -1   8  12   17.57    6.98
   1  -8 -12   22.54    7.15
   1   8 -11    8.10   11.10
   1   8 -11    9.05    7.52
   1   8 -11   -2.91    8.89
  -1   8  11    7.64    6.14
   1  -8 -11   -1.29    6.28
   1   8 -10   37.86    7.80
   1   8 -10   26.93    4.94
   1   8 -10   26.71    6.24
  -1   8  10   30.86    6.47
   1  -8 -10   25.06    9.93
   1   8  -9   23.79    5.97
   1   8  -9   21.10    7.45
   1   8  -9   11.17    6.71
  -1   8   9    2.82    5.57
   1  -8  -9    6.36    8.76
   1   8  -8   40.02   11.40
   1   8  -8   40.58    4.84
   1   8  -8   42.41    6.51
  -1   8   8   52.83    6.23
   1  -8  -8   40.13    8.99
   1  -8  -8   36.96    9.45
   1   8  -7    4.86    6.74
   1   8  -7   10.17    4.01
   1   8  -7   15.38    5.89
  -1   8   7    8.00    5.11
   1  -8  -7   29.08   11.21
   1  -8  -7    6.65    5.40
   1   8  -6  289.29   14.44
   1   8  -6  284.19   12.87
   1   8  -6  288.18   13.42
  -1   8   6  281.19   15.33
   1  -8  -6  272.06   14.72
   1  -8  -6  273.50   15.63
   1   8  -5   67.76    7.72
   1   8  -5   85.42    8.23
  -1   8   5   80.08    6.33
   1  -8  -5   72.59    6.64
   1  -8  -5   65.84    7.97
   1   8  -4  171.71   10.93
  -1   8   4  170.99    7.84
   1   8  -4  175.64    7.10
   1  -8  -4  143.12    8.51
   1  -8  -4  172.22    9.73
   1   8  -3   31.72    7.14
  -1   8   3   32.62    5.04
   1   8  -3   32.39    4.18
   1  -8  -3   29.02    5.47
   1  -8  -3   32.91    8.64
   1   8  -2   10.29    6.51
  -1   8   2    2.26    4.51
   1   8  -2    9.95    3.74
   1  -8  -2   10.06    7.12
  -1  -8   2   27.52    8.39
   1  -8  -2    9.59    4.98
   1   8  -1    1.09    6.21
   1   8  -1    2.21    5.60
  -1   8   1   -2.08    4.32
   1  -8  -1    1.68    4.12
   1  -8  -1   -0.83    4.86
  -1  -8   1   -1.88    5.41
  -1  -8   1    0.04    4.17
   1   8   0   -7.73    3.76
  -1   8   0    0.28    4.25
   1  -8   0    6.65    5.96
  -1  -8   0   -2.92    5.65
  -1  -8   0    3.89    6.23
   1   8   1   36.02    4.29
  -1   8  -1   24.90    7.61
   1  -8   1   30.62    4.14
  -1  -8  -1   38.99    6.80
  -1  -8  -1   22.91    7.12
   1   8   2  627.74   21.06
  -1   8  -2  619.37   22.03
  -1   8  -2  656.05   22.33
  -1  -8  -2  638.95   27.44
  -1  -8  -2  618.34   21.49
   1   8   3    9.62    6.58
  -1   8  -3   -1.52    4.64
  -1   8  -3    5.94    4.39
  -1  -8  -3   -5.82    6.87
  -1  -8  -3    9.75    4.33
   1   8   4  308.32   11.29
  -1   8  -4  345.94   16.24
  -1   8  -4  283.71   14.58
  -1  -8  -4  277.78   16.26
  -1  -8  -4  298.83   11.54
   1   8   5   22.90    4.72
  -1   8  -5   24.06    5.26
  -1   8  -5   23.13    5.16
  -1   8  -5   26.17    7.30
  -1  -8  -5   31.71   12.75
  -1  -8  -5   23.64    7.62
   1   8   6  141.73    7.47
  -1   8  -6  132.34    8.04
  -1   8  -6  137.66    7.79
  -1   8  -6  145.44   15.13
  -1  -8  -6  144.42   12.41
  -1  -8  -6  138.64    7.79
   1   8   7   44.35    5.85
  -1   8  -7   38.38    5.91
  -1   8  -7   43.70    8.49
  -1   8  -7   18.34   12.00
  -1  -8  -7   44.09    9.94
  -1  -8  -7   46.76    8.92
   1   8   8  109.10   10.66
  -1   8  -8  104.01    7.99
  -1   8  -8  104.44    7.89
  -1   8  -8  125.91   10.13
  -1  -8  -8  114.27   19.64
  -1  -8  -8  103.71    7.64
   1   8   9    2.84    5.64
  -1   8  -9   18.52    7.07
  -1   8  -9    6.84    5.84
  -1   8  -9   14.43    8.60
  -1  -8  -9   11.94    9.82
   1   8  10  101.58   12.07
  -1   8 -10  118.51    8.66
  -1   8 -10  110.49    8.09
  -1   8 -10  105.50    9.75
  -1  -8 -10   92.56   21.49
  -1  -8 -10  113.25    8.35
   1   8  11    0.52    5.93
  -1   8 -11    9.37   11.24
  -1   8 -11   -3.70   10.06
  -1  -8 -11    9.62    6.03
  -1  -8 -11   14.05   11.45
   1   8  12  170.22   14.94
  -1   8 -12  175.56   12.19
  -1   8 -12  168.47   11.44
  -1  -8 -12  148.64   10.76
  -1  -8 -12  151.56   18.16
   1   8  13   45.73    8.08
  -1   8 -13   36.14   12.31
  -1   8 -13   43.01    8.49
  -1  -8 -13   30.92   11.33
   1   8  14  189.08   17.20
  -1   8 -14  169.62   12.59
  -1   8 -14  188.88   18.41
  -1  -8 -14  158.27   11.81
   1   8  15   25.14    8.41
  -1   8 -15   31.03    8.65
  -1   8 -15   14.06    8.51
  -1  -8 -15   16.40    8.26
   1   8  16  203.47   14.12
  -1   8 -16  196.58   20.29
  -1  -8 -16  194.42   14.18
   1   8  17  -15.26   14.08
  -1   8 -17   13.02    8.32
  -1  -8 -17   12.94    8.28
   1   8  18   -5.84    9.54
  -1   8 -18   12.15    8.41
  -1  -8 -18    6.49    8.64
   1   8  19   -3.40    9.98
  -1   8 -19   -2.44    9.11
  -1  -8 -19   -5.20   14.07
   1   8  20   15.89   10.72
  -1   8 -20   18.73    9.76
  -1  -8 -20   -0.75   15.25
   1   8  21   22.05   11.36
  -1   8 -21    6.37   10.20
  -1  -8 -21   34.13   15.60
   1   8  22   40.32   20.16
  -1   8 -22   38.19   11.33
  -1  -8 -22   52.79   18.06
   1   9 -21   17.77   13.98
  -1   9  21    5.34   12.27
   1  -9 -21   25.87   11.20
   1   9 -20   -2.07   13.25
   1   9 -20    6.09    8.56
  -1   9  20   17.08   10.96
   1  -9 -20    6.95   10.21
   1   9 -19   19.48   13.57
   1   9 -19   48.46   13.82
  -1   9  19   34.01   11.52
   1  -9 -19   20.79   10.72
   1   9 -18    2.98   11.59
   1   9 -18   -3.00    7.69
  -1   9  18    0.28   14.49
   1  -9 -18  -10.84   14.37
   1   9 -17  141.04   24.67
   1   9 -17  182.09   18.27
  -1   9  17  138.09   14.51
   1  -9 -17  180.53   20.39
   1   9 -16    2.73   10.56
   1   9 -16    2.35    7.34
  -1   9  16    5.40   12.95
   1  -9 -16    4.88    8.54
   1   9 -15   73.83   12.55
   1   9 -15   67.72    8.47
   1   9 -15   80.40    9.42
  -1   9  15   88.41   10.30
   1  -9 -15   71.14   10.51
   1   9 -14   32.07   15.93
   1   9 -14   45.62   10.43
   1   9 -14   43.06   12.11
  -1   9  14   32.52    8.65
   1  -9 -14   24.66    8.80
   1   9 -13   15.99    9.75
   1   9 -13   21.15    6.23
   1   9 -13   18.59    7.55
  -1   9  13   24.64    7.81
   1  -9 -13   26.32   12.10
   1   9 -12   41.25   14.86
   1   9 -12   35.66    6.44
   1   9 -12   48.79    7.66
  -1   9  12   42.62    8.20
   1  -9 -12   28.01   12.88
   1  -9 -12   53.05    8.40
   1   9 -11    2.39    8.45
   1   9 -11    6.07    5.28
   1   9 -11    7.04    6.66
  -1   9  11    1.56    6.79
   1  -9 -11   17.02   16.35
   1  -9 -11    4.74    7.07
   1   9 -10   14.95   12.42
   1   9 -10    2.93    5.06
   1   9 -10   -0.33   10.44
  -1   9  10    6.95    6.52
   1  -9 -10   13.10    9.79
   1  -9 -10    6.99   10.46
   1   9  -9  174.36   13.39
   1   9  -9  169.28    8.47
   1   9  -9  165.85   11.21
  -1   9   9  173.31   10.68
   1  -9  -9  162.23   21.17
   1  -9  -9  189.38   11.06
   1   9  -8   20.42    8.25
   1   9  -8    8.95    7.26
   1   9  -8   11.16    6.76
  -1   9   8   12.65    6.13
   1  -9  -8    9.97    8.82
   1  -9  -8   11.99    6.25
   1   9  -7   86.19    6.26
   1   9  -7  110.61   14.87
  -1   9   7   90.12    7.72
   1   9  -7   78.66    8.80
   1  -9  -7  103.41   10.48
   1  -9  -7   88.79    8.10
   1   9  -6    8.38    6.95
   1   9  -6   -1.51   11.66
  -1   9   6   25.80    8.50
   1   9  -6   12.54    6.66
   1  -9  -6   -2.13   11.58
   1  -9  -6    6.03    5.94
   1   9  -5   26.80    8.28
  -1   9   5   38.55    6.08
   1   9  -5   37.52    4.92
   1  -9  -5   34.44    6.58
   1  -9  -5   40.97   11.39
   1   9  -4    5.75    7.24
  -1   9   4    0.66    4.95
   1   9  -4    5.99    4.26
   1  -9  -4   -9.35    5.57
   1  -9  -4   -9.20    9.67
   1   9  -3   11.20    7.80
  -1   9   3   31.56    5.37
   1   9  -3   26.72    6.84
   1  -9  -3   18.36    6.34
   1  -9  -3   27.10    9.47
   1   9  -2   16.00    7.78
  -1   9   2   16.83    5.28
   1   9  -2   24.60    4.51
   1  -9  -2   22.67    8.29
  -1  -9   2   10.13    5.96
   1  -9  -2    7.30    9.25
  -1   9   1   68.16    9.31
   1   9  -1   68.10    5.49
   1  -9  -1   56.16    6.03
  -1  -9   1   50.09    7.40
   1  -9  -1   56.57    6.95
   1   9   0   23.36    7.28
  -1   9   0   37.06    5.49
   1  -9   0   26.41    7.54
  -1  -9   0   32.50    7.04
  -1  -9   0   18.69    5.35
   1   9   1   34.38    4.95
  -1   9  -1   44.58    5.58
  -1  -9  -1   33.97    7.35
  -1  -9  -1   23.20    5.52
   1   9   2  106.14    6.89
  -1   9  -2   91.68   10.22
  -1  -9  -2  115.22   10.02
  -1  -9  -2  115.11   10.37
   1   9   3   62.60    8.44
  -1   9  -3   52.60    6.61
  -1   9  -3   57.26    6.28
  -1  -9  -3   55.21    9.15
  -1  -9  -3   58.89    6.21
   1   9   4   43.40    5.44
  -1   9  -4   39.49    6.26
  -1   9  -4   27.02    5.82
  -1  -9  -4   52.59    8.96
  -1  -9  -4   28.77    5.81
   1   9   5   45.68    5.97
  -1   9  -5   62.69    6.78
  -1   9  -5   56.44    9.22
  -1   9  -5   44.37    6.15
  -1  -9  -5   46.37    9.35
  -1  -9  -5   57.72   15.23
   1   9   6    1.09    5.17
  -1   9  -6   -1.89    5.67
  -1   9  -6    0.63   11.75
  -1   9  -6    3.79    5.36
  -1  -9  -6    6.11    5.46
  -1  -9  -6    5.20    8.76
   1   9   7   10.11    5.82
  -1   9  -7   14.87    9.23
  -1   9  -7   19.46    8.27
  -1   9  -7    9.71    7.87
  -1  -9  -7    1.32    9.89
  -1  -9  -7   10.90    8.89
   1   9   8   12.28    5.98
  -1   9  -8   12.46    6.55
  -1   9  -8   10.03    5.85
  -1   9  -8   10.91    8.07
  -1  -9  -8   18.92   16.08
  -1  -9  -8   13.37    6.05
   1   9   9   30.04    6.60
  -1   9  -9   28.88    7.38
  -1   9  -9   39.09    9.82
  -1   9  -9   35.44    8.49
  -1  -9  -9   29.38   12.19
  -1  -9  -9   44.94   10.25
   1   9  10   37.11    7.05
  -1   9 -10   35.76    7.74
  -1   9 -10   38.24    6.94
  -1   9 -10   45.72   13.47
  -1  -9 -10   34.12   19.37
  -1  -9 -10   28.52    7.22
   1   9  11   41.59    7.16
  -1   9 -11   51.79   11.73
  -1   9 -11   31.64    7.06
  -1   9 -11   26.11    8.62
  -1  -9 -11   39.63   13.40
  -1  -9 -11   26.45    7.21
   1   9  12   44.15    7.89
  -1   9 -12   32.78    8.61
  -1   9 -12   32.09    7.58
  -1   9 -12   46.79    9.00
  -1  -9 -12   25.98   14.17
  -1  -9 -12   23.62    7.88
   1   9  13   59.59    9.12
  -1   9 -13   64.27    9.70
  -1   9 -13   55.45    8.76
  -1   9 -13   69.74   14.82
  -1  -9 -13   48.52   24.14
  -1  -9 -13   55.52   13.31
   1   9  14   72.15    9.97
  -1   9 -14   81.02   10.65
  -1   9 -14   62.02   10.81
  -1  -9 -14   83.46    9.75
  -1  -9 -14   52.26   17.80
   1   9  15   79.83   15.61
  -1   9 -15   75.00   11.05
  -1   9 -15   82.97   16.51
  -1  -9 -15   82.34   10.74
  -1  -9 -15   86.20   18.71
   1   9  16    3.89    8.80
  -1   9 -16   11.79    9.24
  -1   9 -16   14.41    9.57
  -1  -9 -16    6.77    8.62
  -1  -9 -16   25.27   16.53
   1   9  17   43.60   10.17
  -1   9 -17   21.14   17.20
  -1   9 -17   34.95   10.21
  -1  -9 -17   21.22    9.67
   1   9  18   15.58   10.11
  -1   9 -18    9.23   14.99
  -1  -9 -18   16.28   15.15
   1   9  19   11.12   11.27
  -1   9 -19   18.05    9.99
  -1  -9 -19   15.56   15.43
   1   9  20   20.42   17.45
  -1   9 -20    5.66   15.61
  -1  -9 -20    6.25   10.40
   1   9  21   24.12   12.72
  -1   9 -21   33.27   11.21
  -1  -9 -21   28.17   11.97
   1  10 -20   28.39   14.65
   1  10 -20   17.06    9.15
   1  10 -20   22.09    9.77
  -1  10  20    4.48   11.92
   1 -10 -20    9.41   11.73
   1  10 -19    8.86   13.73
   1  10 -19   10.37    8.46
   1  10 -19    6.60    9.11
  -1  10  19   11.66   11.17
   1 -10 -19    9.74   10.96
   1  10 -18   32.68   20.85
   1  10 -18   34.02    8.91
   1  10 -18   38.37   14.11
  -1  10  18   36.49   10.99
   1 -10 -18   29.09   11.16
   1  10 -17    7.90   11.95
   1  10 -17   -1.72   11.47
   1  10 -17   -2.19    8.63
  -1  10  17    9.70    9.75
   1 -10 -17   23.83   16.42
   1 -10 -17    4.08   15.00
   1  10 -16   52.54   14.19
   1  10 -16   69.68    9.19
   1  10 -16   81.80   15.37
  -1  10  16   76.46   17.36
   1 -10 -16   82.46   19.55
   1 -10 -16  102.01   18.02
   1  10 -15   41.74   18.28
   1  10 -15   28.25    7.65
   1  10 -15   28.16    8.75
  -1  10  15   29.04   10.01
   1 -10 -15   24.81   15.63
   1 -10 -15   38.52    9.99
   1  10 -14   55.06   12.28
   1  10 -14   53.62   11.54
   1  10 -14   52.96    9.47
  -1  10  14   62.46   15.25
   1 -10 -14   70.54   24.40
   1 -10 -14   58.20   10.70
   1  10 -13   23.55   10.97
   1  10 -13   36.09    7.10
   1  10 -13   37.51   13.23
  -1  10  13   36.96    8.88
   1 -10 -13   17.76   14.16
   1 -10 -13   28.85    9.21
   1  10 -12    4.52   10.05
   1  10 -12   12.79    9.23
   1  10 -12    0.30    7.53
  -1  10  12    3.87    8.07
   1 -10 -12   11.44   12.23
   1 -10 -12    1.03   12.59
   1  10 -11  183.67   15.71
   1  10 -11  154.51    9.83
   1  10 -11  165.80   12.42
  -1  10  11  167.22   12.34
   1 -10 -11  143.47   25.98
   1 -10 -11  193.65   13.02
   1  10 -10   35.35   10.52
   1  10 -10   34.82    6.38
   1  10 -10   46.01    8.27
  -1  10  10   19.99    8.24
   1 -10 -10   41.23   11.96
   1 -10 -10   29.08    8.46
   1  10  -9   48.93   13.18
  -1  10   9   45.79    8.28
   1  10  -9   50.90    6.50
   1 -10  -9   51.98   17.31
   1 -10  -9   63.77   12.65
   1  10  -8   77.24   10.24
   1  10  -8   90.38   11.62
  -1  10   8   89.02    9.06
   1  10  -8   84.35    9.61
   1 -10  -8   87.25   12.04
   1 -10  -8   83.25    9.11
   1  10  -7   23.42    9.36
   1  10  -7   20.22    8.00
  -1  10   7   13.08    6.98
   1  10  -7   16.59    5.53
   1 -10  -7   21.23    9.06
   1 -10  -7    3.47   11.01
   1  10  -6  113.00   17.25
   1  10  -6   98.81   11.20
  -1  10   6  115.05    8.76
   1  10  -6  105.90   10.59
   1 -10  -6  116.48   10.92
   1 -10  -6   98.83    9.55
  -1  10   5    0.48    6.20
   1  10  -5   -0.57    4.96
   1 -10  -5    6.66    9.96
   1 -10  -5    1.63   11.36
   1  10  -4   22.14    9.09
  -1  10   4   19.54    9.69
   1  10  -4   19.89    8.10
   1 -10  -4   34.19    7.39
   1 -10  -4   30.85   11.10
   1  10  -3   92.23   10.94
  -1  10   3   93.32    8.31
   1  10  -3   98.55    7.00
   1 -10  -3  109.54   13.33
   1 -10  -3   92.57   12.52
  -1  10   2   -5.50    9.08
   1  10  -2    2.80    5.01
   1 -10  -2    3.38    6.72
   1 -10  -2    6.47    8.80
  -1  10   1   41.57    6.70
   1  10  -1   47.95    8.85
  -1 -10   1   49.03   11.95
   1 -10  -1   52.69    6.68
  -1  10   0    1.85    5.78
   1  10   0   -2.52    4.98
  -1 -10   0    0.19   10.87
   1 -10   0   10.90    5.22
   1  10   1    7.19    8.40
  -1  10  -1   23.65    6.16
  -1 -10  -1   22.16   11.80
  -1 -10  -1   21.25    6.29
   1  10   2  132.76    8.27
  -1  10  -2  141.89    9.01
  -1 -10  -2  130.62   16.89
  -1 -10  -2  123.33    9.33
   1  10   3   18.48    5.73
  -1  10  -3   16.68    9.49
  -1 -10  -3   24.72    8.89
  -1 -10  -3   19.76    9.62
   1  10   4   22.59    5.94
  -1  10  -4   16.79    6.37
  -1 -10  -4   39.45    9.56
  -1 -10  -4   20.20    6.48
   1  10   5   53.32    6.98
  -1  10  -5   71.38   11.56
  -1  10  -5   65.68   10.62
  -1  10  -5   65.71   10.62
  -1 -10  -5   64.60    7.49
  -1 -10  -5   66.89   17.15
   1  10   6    9.75    6.08
  -1  10  -6   14.51   10.14
  -1  10  -6   12.08   13.65
  -1  10  -6    5.26    6.06
  -1 -10  -6    4.39    6.40
  -1 -10  -6    5.39   10.15
   1  10   7  112.75    9.21
  -1  10  -7  131.49   14.11
  -1  10  -7  117.05   13.06
  -1  10  -7  100.73   12.95
  -1 -10  -7  121.26    9.51
  -1 -10  -7  132.28   14.87
   1  10   8   32.98    7.12
  -1  10  -8   31.29   11.65
  -1  10  -8   29.92    6.82
  -1  10  -8   29.46    9.65
  -1 -10  -8   33.76   18.90
  -1 -10  -8   34.20    7.35
   1  10   9   80.02    8.88
  -1  10  -9   64.80   14.07
  -1  10  -9   81.79   12.09
  -1  10  -9   91.12   16.48
  -1 -10  -9   75.94   14.53
  -1 -10  -9   91.63   13.36
   1  10  10    7.14    6.93
  -1  10 -10   -3.71    7.33
  -1  10 -10    3.74    6.68
  -1  10 -10    0.21    9.01
  -1 -10 -10    2.31   18.78
  -1 -10 -10   -3.49    7.04
   1  10  11   76.41    9.76
  -1  10 -11   81.27   10.39
  -1  10 -11   92.81    9.06
  -1  10 -11   77.97   11.35
  -1 -10 -11   91.47   16.80
  -1 -10 -11   78.15   10.09
   1  10  12   20.17    8.07
  -1  10 -12   22.74   13.16
  -1  10 -12   14.46   11.46
  -1  10 -12   -0.85   14.21
  -1 -10 -12   14.58   14.12
  -1 -10 -12   15.85   12.39
   1  10  13   27.72   14.26
  -1  10 -13   36.45   10.31
  -1  10 -13   53.85    8.72
  -1  10 -13   40.04   10.42
  -1 -10 -13   48.46   25.21
  -1 -10 -13   52.40    9.31
   1  10  14   60.81    9.50
  -1  10 -14   50.20   15.53
  -1  10 -14   50.70    9.05
  -1  10 -14   37.99   10.76
  -1 -10 -14   44.08   17.51
  -1 -10 -14   21.74    9.76
   1  10  15    4.68   13.94
  -1  10 -15   10.77   10.18
  -1  10 -15    9.22   13.29
  -1  10 -15    7.50   15.00
  -1 -10 -15    4.64   17.05
  -1 -10 -15   15.68    9.22
   1  10  16   71.23   11.66
  -1  10 -16   40.18   18.66
  -1  10 -16   64.97   10.34
  -1  10 -16   63.65   11.47
  -1 -10 -16   61.38   20.45
  -1 -10 -16   51.49   11.33
   1  10  17   28.50   10.69
  -1  10 -17   13.59   11.53
  -1  10 -17   15.30    9.22
  -1  10 -17   18.87   16.16
  -1 -10 -17    2.56   29.63
  -1 -10 -17   36.35   15.48
   1  10  18    8.61   17.05
  -1  10 -18    1.56   12.08
  -1  10 -18   14.14    9.68
  -1  10 -18   21.32   10.73
  -1 -10 -18   32.39   30.43
  -1 -10 -18   24.01   15.84
   1  10  19   -0.72   11.70
  -1  10 -19   41.32   15.89
  -1 -10 -19   12.51   20.96
  -1 -10 -19    9.22   10.92
   1  11 -17   15.49   14.13
   1  11 -17   29.41    8.52
   1  11 -17   24.07    9.80
  -1  11  17   15.58   11.02
   1 -11 -17   35.09   18.26
   1 -11 -17    5.29   11.60
   1  11 -16   17.94   19.97
   1  11 -16    3.49    7.69
   1  11 -16    4.63    9.02
  -1  11  16   11.80   15.68
   1 -11 -16    3.41   16.89
   1 -11 -16   10.97   10.18
   1  11 -15   22.12   13.36
   1  11 -15   19.30   12.43
   1  11 -15   29.21   14.44
  -1  11  15   16.34   10.66
   1 -11 -15   30.55   16.85
   1 -11 -15   18.36   16.58
   1  11 -14   47.70   14.45
   1  11 -14   62.27    8.49
   1  11 -14   50.81   10.67
  -1  11  14   88.90   17.16
   1 -11 -14   70.88   26.54
   1 -11 -14   79.76   11.89
   1  11 -13   20.99   18.75
   1  11 -13   14.07    7.03
   1  11 -13   11.76    9.15
  -1  11  13   21.14    9.01
   1 -11 -13   10.45   14.57
   1 -11 -13    5.19    9.80
   1  11 -12   77.98   14.25
   1  11 -12   69.42   12.24
   1  11 -12   87.04   16.37
  -1  11  12   75.60   11.03
   1 -11 -12  105.36   16.77
   1 -11 -12   85.68   11.14
   1  11 -11    2.29    6.27
   1  11 -11   13.94   16.49
  -1  11  11    2.38    8.39
   1  11 -11    3.44    8.33
   1 -11 -11   -3.31   12.72
   1 -11 -11   19.90   13.20
   1  11 -10   59.00    7.39
   1  11 -10   63.51   12.57
  -1  11  10   66.30    9.93
   1  11 -10   68.75   10.65
   1 -11 -10   62.11   13.78
   1 -11 -10   62.56   10.09
   1  11  -9   20.66   10.67
   1  11  -9   17.81   13.75
  -1  11   9   27.34    8.11
   1  11  -9   13.01    6.46
   1 -11  -9    5.98   11.21
   1 -11  -9   24.85    8.66
   1  11  -8   14.55   15.69
   1  11  -8   20.53    8.86
  -1  11   8   15.23    7.88
   1  11  -8   26.57    6.48
   1 -11  -8   25.18   16.34
   1 -11  -8   18.66    8.42
   1  11  -7   36.82   10.68
   1  11  -7   38.66    9.98
  -1  11   7   51.14   12.09
   1  11  -7   39.31    6.56
   1 -11  -7   36.92   10.61
   1 -11  -7   27.19    8.79
   1  11  -6   14.01    9.41
   1  11  -6   -0.28    9.02
  -1  11   6   -3.26    7.00
   1  11  -6   -0.56    5.64
   1 -11  -6   11.47    8.94
   1 -11  -6    6.74   12.37
   1  11  -5   83.99   17.00
  -1  11   5   76.73   12.36
   1  11  -5   52.95    6.76
   1 -11  -5   58.86    9.27
   1 -11  -5   40.60    9.47
   1  11  -4   94.88   12.16
  -1  11   4   81.38    9.11
   1  11  -4   90.10    7.77
   1 -11  -4   89.00   14.72
   1 -11  -4   76.62   14.54
  -1  11   3   25.85   10.77
   1  11  -3   25.12    6.25
   1 -11  -3   14.19    8.05
   1 -11  -3   13.36   11.25
   1  11  -2  102.45   12.01
  -1  11   2  102.45    9.17
   1 -11  -2  104.96   13.21
  -1  11   1    6.42    6.83
   1  11  -1    4.75    5.99
  -1 -11   1   10.46    7.58
   1 -11  -1    3.77    6.05
   1  11   0  201.99   14.52
  -1  11   0  186.38   11.26
  -1 -11   0  184.22   13.60
   1  11   1   20.28    6.22
  -1  11  -1   17.08    6.98
  -1 -11  -1    2.99   13.37
   1  11   2   71.89   11.36
  -1  11  -2   67.01    7.97
  -1 -11  -2   73.06   15.94
  -1 -11  -2   74.23    8.83
   1  11   3   36.47    6.91
  -1  11  -3   33.11    7.53
  -1 -11  -3   51.10    9.98
  -1 -11  -3   41.62    7.83
   1  11   4   38.98   10.66
  -1  11  -4   32.16    7.37
  -1 -11  -4   44.41   10.61
  -1 -11  -4   42.07   12.13
   1  11   5   10.96    6.50
  -1  11  -5   11.34   10.50
  -1  11  -5    4.63    6.88
  -1 -11  -5   16.12    7.01
  -1 -11  -5   15.10   10.51
   1  11   6   52.61   11.74
  -1  11  -6   50.49    8.66
  -1  11  -6   43.99   11.75
  -1  11  -6   50.82    7.79
  -1 -11  -6   32.47   12.98
  -1 -11  -6   68.49   18.87
   1  11   7   47.78    8.18
  -1  11  -7   45.13    8.75
  -1  11  -7   53.20   11.66
  -1  11  -7   45.83   11.79
  -1 -11  -7   31.20    8.58
  -1 -11  -7   45.48   12.90
   1  11   8  175.20   16.44
  -1  11  -8  135.72   11.67
  -1  11  -8  152.83   14.48
  -1  11  -8  136.41   10.42
  -1 -11  -8  116.20   11.49
  -1 -11  -8  119.64   25.75
   1  11   9    5.31    7.68
  -1  11  -9    5.55   12.68
  -1  11  -9   10.34   15.18
  -1  11  -9   15.47   10.80
  -1 -11  -9   20.31   12.22
  -1 -11  -9   12.91   12.79
   1  11  10  107.50   10.53
  -1  11 -10  110.24   16.84
  -1  11 -10  105.73    9.91
  -1  11 -10   79.31   12.94
  -1 -11 -10   92.93   25.86
  -1 -11 -10  110.12   11.03
   1  11  11    1.49    8.26
  -1  11 -11   12.29    9.04
  -1  11 -11    4.81    7.49
  -1  11 -11    0.76    9.73
  -1 -11 -11   11.78   14.33
  -1 -11 -11   13.58    8.42
   1  11  12   29.37    9.00
  -1  11 -12    0.81    9.84
  -1  11 -12   18.67   12.44
  -1  11 -12   37.06   16.15
  -1 -11 -12   27.51   15.57
  -1 -11 -12   37.07   14.00
   1  11  13   23.74   14.14
  -1  11 -13    9.87   15.44
  -1  11 -13    3.18    8.20
  -1  11 -13   11.79   10.30
  -1 -11 -13   26.53   25.10
  -1 -11 -13   12.00    9.27
   1  11  14    9.40    9.09
  -1  11 -14   -7.43   10.08
  -1  11 -14   -7.23    8.19
  -1  11 -14   13.30   10.00
  -1 -11 -14   17.64   16.38
  -1 -11 -14    5.45    9.50
   1  11  15   40.40   10.77
  -1  11 -15   33.34   17.84
  -1  11 -15   24.63   14.12
  -1  11 -15   25.05   11.15
  -1 -11 -15    8.04   18.98
  -1 -11 -15   25.39   10.56
   1  11  16   26.71   11.33
  -1  11 -16   34.87   12.28
  -1  11 -16   28.69   10.18
  -1  11 -16   27.84   11.34
  -1 -11 -16   57.65   30.77
  -1 -11 -16   55.78   17.25
   1  11  17    3.99   10.95
  -1  11 -17   12.57   12.11
  -1  11 -17   -0.94    9.65
  -1  11 -17   12.11   16.70
  -1 -11 -17   12.49   30.28
  -1 -11 -17    7.65   16.42
   1  12 -15   12.18   14.49
   1  12 -15   16.36   12.69
   1  12 -15   29.73   15.93
  -1  12  15   19.17   11.10
   1 -12 -15   21.89   26.62
   1 -12 -15   15.98   11.41
   1  12 -14   -2.84    7.73
   1  12 -14    8.72   20.10
  -1  12  14   10.54   10.19
   1  12 -14    3.04    9.73
   1 -12 -14   15.07   15.24
   1 -12 -14    3.93   16.48
   1  12 -13   22.25    8.04
   1  12 -13   32.95   13.76
  -1  12  13   16.48   10.41
   1  12 -13   33.12   10.33
   1 -12 -13   14.79   15.54
   1 -12 -13   22.43   10.60
   1  12 -12   26.22   11.64
   1  12 -12   24.19   19.58
  -1  12  12    7.76    9.39
   1  12 -12    5.19   14.64
   1 -12 -12   13.75   22.03
   1 -12 -12   -1.81   10.13
   1  12 -11   59.16   14.39
   1  12 -11   76.76   11.58
  -1  12  11   52.58   16.78
   1  12 -11   59.83    8.74
   1 -12 -11   54.81   15.83
   1 -12 -11   65.67   11.36
   1  12 -10   17.32   18.56
   1  12 -10    1.79    9.78
  -1  12  10   10.63    8.82
   1  12 -10   -1.19    6.95
   1 -12 -10   20.36   19.17
   1 -12 -10    7.68    9.73
   1  12  -9   44.62   12.91
   1  12  -9   51.26   16.57
  -1  12   9   46.86   14.87
   1  12  -9   49.61    8.03
   1 -12  -9   51.34   13.77
   1 -12  -9   53.90   10.64
   1  12  -8   27.35   12.23
   1  12  -8   14.75   10.37
  -1  12   8   18.53    9.09
   1  12  -8   33.25    7.35
   1 -12  -8   29.16   17.38
   1 -12  -8   36.45   14.99
   1  12  -7    8.06   17.03
   1  12  -7   14.04   10.30
  -1  12   7    8.57   12.79
   1  12  -7    1.94   10.10
   1 -12  -7   27.43   15.92
   1 -12  -7    9.35    9.35
   1  12  -6   11.80   10.82
   1  12  -6    5.18   15.18
  -1  12   6   19.62    7.97
   1  12  -6    0.14    6.53
   1 -12  -6   10.77    9.43
   1 -12  -6    5.01    9.43
   1  12  -5    7.29   10.41
  -1  12   5   11.52    7.81
   1  12  -5   18.37   10.12
   1 -12  -5   18.36    8.89
   1 -12  -5    8.78    8.98
  -1  12   4    7.84    8.26
   1  12  -4   11.64    6.52
   1 -12  -4    8.25    8.83
   1 -12  -4   11.35    8.20
   1  12  -3  168.22   15.29
  -1  12   3  147.22   11.76
   1 -12  -3  158.95   17.38
   1  12  -2   -2.35    6.50
  -1  12   2   -0.65    7.34
   1 -12  -2   -1.51   10.36
   1  12  -1  168.25   15.60
  -1  12   1  171.85   12.17
   1  12   0   -0.20    6.54
  -1  12   0    4.96    7.59
  -1 -12   0   10.68    8.39
   1  12   1   62.75    8.09
  -1  12  -1   51.38    8.71
  -1 -12  -1   62.07   10.93
   1  12   2    1.84    6.66
  -1  12  -2   -9.95   10.85
  -1 -12  -2    0.30   14.23
   1  12   3   -1.08    6.77
  -1  12  -3    9.13    7.05
  -1 -12  -3   14.47   14.95
  -1 -12  -3    0.53    7.88
   1  12   4    6.93    7.00
  -1  12  -4    3.21   10.87
  -1 -12  -4   -1.61   10.29
  -1 -12  -4    9.10    7.91
   1  12   5   20.58    7.81
  -1  12  -5   17.87   12.02
  -1  12  -5   26.06    7.72
  -1 -12  -5   18.08    8.91
  -1 -12  -5   41.02   11.89
   1  12   6   16.01   11.72
  -1  12  -6   23.82   11.68
  -1  12  -6   11.09    7.89
  -1 -12  -6    7.35   12.95
  -1 -12  -6   26.14   18.36
   1  12   7   74.11    9.71
  -1  12  -7   73.89   20.69
  -1  12  -7   74.07    9.47
  -1 -12  -7   74.09   10.50
  -1 -12  -7   50.48   14.92
   1  12   8    7.31   12.41
  -1  12  -8    8.30   12.98
  -1  12  -8   11.74   11.39
  -1  12  -8   10.77    7.88
  -1 -12  -8    2.70   13.53
  -1 -12  -8   12.85   20.96
   1  12   9    7.03    8.54
  -1  12  -9    5.22   11.31
  -1  12  -9   21.30   12.06
  -1 -12  -9   22.25    8.88
  -1 -12  -9   29.48   14.47
   1  12  10    0.91    8.47
  -1  12 -10    4.82   11.06
  -1  12 -10   -1.80    7.83
  -1 -12 -10  -12.66    9.35
  -1 -12 -10    6.77   21.72
   1  12  11   20.42    9.33
  -1  12 -11    9.96   10.91
  -1  12 -11    8.67    8.28
  -1 -12 -11   21.56   14.45
  -1 -12 -11   21.09   15.59
   1  12  12    1.03    9.25
  -1  12 -12   23.57   17.05
  -1  12 -12    2.16   12.92
  -1 -12 -12    9.47    9.73
  -1 -12 -12   -1.61   15.81
   1  12  13   19.09   14.76
  -1  12 -13   -0.70   11.07
  -1  12 -13    6.99    8.47
  -1 -12 -13  -10.87    9.83
  -1 -12 -13   15.35   26.06
   1  12  14   -6.68   10.33
  -1  12 -14   12.18   17.00
  -1  12 -14    4.79    8.50
  -1 -12 -14    4.62   10.32
  -1 -12 -14   -2.63   17.83
   1  13 -11    6.82   20.16
   1  13 -11    7.94   10.51
  -1  13  11   18.65   15.71
   1  13 -11    6.72    7.87
   1 -13 -11   13.18   14.28
   1 -13 -11    2.52   10.99
   1  13 -10   15.90   13.34
   1  13 -10    8.38   17.87
  -1  13  10   20.18   10.26
   1  13 -10   17.66    7.92
   1 -13 -10   54.57   21.17
   1 -13 -10   23.15   17.23
   1  13  -9    3.02   18.40
   1  13  -9   21.58   10.66
  -1  13   9   -3.39    9.70
   1  13  -9    9.21   11.50
   1 -13  -9   -3.83   12.58
   1 -13  -9   -0.05   10.70
   1  13  -8   10.50   12.22
   1  13  -8    9.08   11.28
  -1  13   8   16.42    9.51
   1  13  -8   12.16    7.76
   1 -13  -8    3.07   11.57
   1 -13  -8   13.69   10.90
   1  13  -7   21.92   17.44
  -1  13   7    5.83    9.01
   1  13  -7    7.02    7.43
   1 -13  -7   14.02   16.74
   1 -13  -7    8.95   15.72
   1  13  -6   -1.43   11.39
  -1  13   6   27.96   13.57
   1  13  -6    1.62    7.24
   1 -13  -6    9.50    9.81
   1 -13  -6    5.02    9.97
   1  13  -5    7.61   11.54
  -1  13   5   -1.56    8.35
   1  13  -5    0.26    7.19
   1 -13  -5    9.89    9.22
   1 -13  -5    1.40   10.17
   1  13  -4   42.46   12.27
  -1  13   4   57.11   14.51
   1 -13  -4   36.06    9.63
   1  13  -3   -3.27    7.32
  -1  13   3   16.19    8.48
   1 -13  -3    1.69    7.68
   1  13  -2   85.18   13.97
  -1  13   2   80.85   10.42
   1  13  -1    8.97    7.40
  -1  13   1    5.55    8.13
   1  13   0   46.81    8.78
  -1  13   0   46.40    9.40
   1  13   1    8.23    7.67
  -1  13  -1   20.50   12.76
  -1 -13  -1   10.43   10.01
   1  13   2   -1.43    7.47
  -1  13  -2    3.47    8.20
  -1 -13  -2   11.76   10.34
   1  13   3   26.59   12.47
  -1  13  -3   37.84   13.21
  -1 -13  -3   23.24   17.35
   1  13   4    7.28    7.99
  -1  13  -4  -11.15   12.44
  -1  13  -4    7.51    8.16
  -1 -13  -4    6.79    9.07
  -1 -13  -4   -0.58   11.09
   1  13   5   19.35   12.54
  -1  13  -5   30.58   20.34
  -1  13  -5    9.89    8.24
  -1 -13  -5   22.70   14.76
  -1 -13  -5   12.73   12.13
   1  13   6   16.98    8.47
  -1  13  -6   12.57   13.16
  -1  13  -6   14.41   12.93
  -1 -13  -6   20.30    9.62
  -1 -13  -6   14.68   19.21
   1  13   7    3.14    8.79
  -1  13  -7   14.12   18.25
  -1  13  -7    0.33    8.19
  -1 -13  -7    8.88    9.89
  -1 -13  -7   -8.08   12.93
   1  13   8   17.79    9.26
  -1  13  -8   23.30   12.79
  -1  13  -8   17.79    8.82
  -1 -13  -8   17.66    9.93
  -1 -13  -8   52.51   22.63
   1  13   9    6.91    9.37
  -1  13  -9    5.57   12.29
  -1  13  -9    8.57    8.73
  -1 -13  -9   20.45   10.10
  -1 -13  -9    6.41   14.71
   1  13  10   41.96   15.74
  -1  13 -10   39.82   20.84
  -1  13 -10   28.07    9.91
  -1 -13 -10   34.06   11.26
  -1 -13 -10   49.51   25.50
   1  14  -3   26.54   13.10
  -1  14   3   18.30   14.32
   1  14  -2   -4.80    8.09
  -1  14   2   11.98    9.32
   1  14  -1   28.41   13.02
  -1  14   1   10.46    9.59
   1  14   0   14.49    8.31
  -1  14   0   12.11   13.93
   1  14   1   10.06    8.39
  -1  14  -1    4.10    9.20
   1  14   2   22.71   13.10
  -1  14  -2   12.32    9.03
  -1 -14  -2    6.89   10.91
   1  14   3    7.44    8.69
  -1  14  -3   10.78    8.85
  -1  14  -3    0.53   14.22
   2   0 -28    0.28   14.37
  -2   0  28   12.73   17.99
   2   0 -27    4.02    9.01
  -2   0  27   -2.74   10.97
   2   0 -26   86.31   10.84
  -2   0  26   84.80   13.42
   2   0 -25   15.44    8.09
  -2   0  25   -2.70   10.00
   2   0 -24  206.52   13.50
  -2   0  24  186.54   22.14
   2   0 -23   -0.12   10.28
  -2   0  23   -5.10    8.45
   2   0 -22  236.95   12.82
  -2   0  22  231.64   14.98
   2   0 -21   -5.12    5.80
  -2   0  21   12.85   10.85
   2   0 -20  228.68   11.07
  -2   0  20  215.16   12.57
   2   0 -19   -4.17    5.09
  -2   0  19    2.31    5.98
   2   0 -18  135.63    7.77
  -2   0  18  140.91    8.86
   2   0 -17    5.40    6.60
  -2   0  17   13.16    8.08
   2   0 -16   20.31    6.38
  -2   0  16   23.42    4.98
   2   0 -15    5.26    5.62
  -2   0  15    2.65    4.16
   2   0 -14  186.96    7.16
  -2   0  14  220.41   10.92
   2   0 -13    0.11    3.16
  -2   0  13    0.37    3.54
   2   0 -12 1849.70   71.31
  -2   0  12 1719.03   70.18
   2   0 -11   -2.02    2.61
   2   0 -10  359.44   10.48
  -2   0  10  338.44    8.84
   2   0  -9   -0.84    3.16
  -2   0   9    0.65    3.56
   2   0  -8  194.97    4.67
  -2   0   8  200.05    5.06
   2   0  -7    2.04    1.65
  -2   0   7    0.30    1.65
   2   0  -6  835.43   18.90
  -2   0   6  847.97   19.18
   2   0  -5   -0.12    1.22
  -2   0   5   -2.16    1.28
   2   0  -4 9999.00  985.29
  -2   0   4 9966.53  982.88
   2   0  -3   -0.64    0.78
  -2   0   3   -0.05    0.76
   2   0  -2 1690.20   54.26
   2   0  -2 1757.38   46.51
  -2   0   2 1740.64   46.46
   2   0  -1    0.78    1.73
  -2   0   1   -1.42    1.68
   2   0   0  574.13   12.90
   2   0   0  561.01   10.78
  -2   0   0  568.41   14.08
  -2   0   0  593.85   11.10
   2   0   1    0.65    1.54
  -2   0  -1    0.90    2.29
  -2   0  -1    1.93    2.22
   2   0   2 1855.36   61.01
  -2   0  -2 1796.18   58.55
   2   0   3    0.44    2.19
  -2   0  -3    0.91    2.25
   2   0   4  554.04   13.52
  -2   0  -4  535.07   13.32
   2   0   5   -2.91    2.66
  -2   0  -5   -4.43    2.50
   2   0   6  233.41    9.18
  -2   0  -6  217.96    6.48
   2   0   7    1.15    3.24
  -2   0  -7    1.68    2.98
   2   0   8  307.30    9.89
  -2   0  -8  328.24    9.57
   2   0   9   -1.55    3.82
  -2   0  -9   -0.64    3.34
   2   0  10 1104.29   40.04
  -2   0 -10 1125.92   38.42
   2   0  11    6.92    4.43
  -2   0 -11    0.17    3.99
   2   0  12   22.28    7.64
  -2   0 -12    6.60    6.51
   2   0  13    3.91    8.23
  -2   0 -13    2.54    4.31
   2   0  14  162.19    9.68
  -2   0 -14  158.77    8.40
   2   0  15    0.93    6.23
  -2   0 -15    1.07    8.20
   2   0  16  188.76   11.61
  -2   0 -16  170.79    9.88
   2   0  17    4.45    7.10
  -2   0 -17    6.87    6.04
   2   0  18  386.30   19.59
  -2   0 -18  355.33   17.20
   2   0  19   -0.84    8.21
  -2   0 -19   12.44   10.28
   2   0  20   14.05   13.52
  -2   0 -20    6.19    7.26
   2   0  21    6.82    9.68
  -2   0 -21   -0.84    7.52
   2   0  22    3.02   10.47
  -2   0 -22    1.54    8.15
   2   0  23   11.72   11.33
  -2   0 -23    5.82   13.13
   2   0  24   10.81   11.64
  -2   0 -24    0.44    8.84
   2   0  25    3.78   13.03
  -2   0 -25   11.58    9.56
   2   0  26   76.13   23.63
  -2   0 -26   47.63   11.86
   2   1 -28   29.27    9.64
  -2   1  28   23.29   20.46
   2  -1 -28   17.90   10.06
  -2  -1  28   14.83   12.76
   2   1 -27   28.82   13.61
  -2   1  27    0.79   11.75
   2  -1 -27   16.48    9.41
  -2  -1  27    7.79   11.81
   2   1 -26    3.28    7.86
  -2   1  26   -7.32   10.57
   2  -1 -26   -6.52    8.50
  -2  -1  26    6.45   10.59
   2   1 -25   88.64   10.56
  -2   1  25  117.35   13.59
   2  -1 -25   96.27   15.84
  -2  -1  25  100.00   13.16
   2   1 -24   17.24    7.31
  -2   1  24    1.29   14.43
   2  -1 -24   14.63   11.93
  -2  -1  24   -7.50   14.28
   2   1 -23  186.94   11.77
  -2   1  23  190.67   14.65
   2  -1 -23  191.36   12.48
  -2  -1  23  193.52   14.71
   2   1 -22   14.58    9.99
  -2   1  22   17.86    8.08
   2  -1 -22   10.10    6.99
  -2  -1  22   19.60    8.26
   2   1 -21   71.61    7.70
  -2   1  21   98.95   14.16
   2  -1 -21   64.60    7.98
  -2  -1  21   82.53    9.03
   2   1 -20   11.27    5.55
  -2   1  20    8.46    6.92
   2  -1 -20   18.88    5.97
  -2  -1  20   15.84   10.85
   2   1 -19    6.89    4.99
  -2   1  19    2.11    6.42
   2  -1 -19    0.43    5.26
  -2  -1  19    9.32    9.40
   2   1 -18  186.70    8.28
  -2   1  18  170.92   14.02
   2  -1 -18  163.02    9.00
  -2  -1  18  166.61    9.98
   2   1 -17    3.78    6.58
  -2   1  17   -0.18    5.33
   2  -1 -17    4.38    4.68
  -2  -1  17    1.33    5.13
   2   1 -16   24.40    4.48
  -2   1  16   20.35    5.33
   2  -1 -16   26.77    4.56
  -2  -1  16   25.35    5.25
   2   1 -15  531.79   16.78
  -2   1  15  487.51   21.42
   2  -1 -15  554.50   17.72
  -2  -1  15  530.60   22.47
   2   1 -14   12.30    3.34
  -2   1  14    4.55    4.13
   2  -1 -14    4.46    3.58
  -2  -1  14   13.77    6.04
   2   1 -13  626.54   18.11
  -2   1  13  636.14   23.01
   2  -1 -13  626.78   18.90
  -2  -1  13  616.85   19.39
   2   1 -12  232.36    8.87
  -2   1  12  239.63    8.00
   2  -1 -12  231.70    7.55
  -2  -1  12  235.21    7.76
   2   1 -11  428.60   13.32
  -2   1  11  453.54   15.29
   2  -1 -11  437.44   11.97
  -2  -1  11  440.00   12.31
   2   1 -10  767.12   20.26
  -2   1  10  810.28   22.32
   2  -1 -10  762.78   21.33
  -2  -1  10  751.64   23.88
   2   1  -9  687.88   16.36
  -2   1   9  651.24   16.91
   2  -1  -9  700.61   19.51
  -2  -1   9  596.90   17.66
   2   1  -8    5.98    1.81
  -2   1   8   11.00    3.39
   2  -1  -8    4.45    2.13
  -2  -1   8    7.75    2.00
   2   1  -7  257.95    5.27
  -2   1   7  254.00    7.28
   2  -1  -7  245.73    5.75
  -2  -1   7  267.91    5.56
   2   1  -6  438.85    8.36
  -2   1   6  483.55   10.13
   2  -1  -6  462.90   11.28
  -2  -1   6  470.61    9.10
   2   1  -5  295.76    5.41
  -2   1   5  272.97    5.70
   2  -1  -5  285.90    5.86
  -2  -1   5  297.62    5.06
   2   1  -4   11.54    0.74
  -2   1   4    9.81    1.58
   2  -1  -4    6.73    2.53
  -2  -1   4   11.24    0.81
   2   1  -3    2.41    2.80
   2   1  -3    6.93    0.50
  -2   1   3    7.29    1.46
   2  -1  -3    7.90    1.47
  -2  -1   3    5.01    0.52
   2   1  -2  568.77   13.94
  -2   1   2  539.95   10.42
   2  -1  -2  556.42   11.70
  -2  -1   2  578.27   13.93
   2   1  -1 4601.57  283.24
  -2   1   1 4746.11  261.95
   2  -1  -1 4405.08  238.83
  -2  -1   1 4483.72  281.77
   2   1   0    7.79    3.16
   2   1   0   10.07    1.28
  -2   1   0    8.62    1.07
  -2  -1   0   16.26    4.48
  -2  -1   0    9.97    1.25
   2   1   1  317.31    9.12
   2   1   1  303.25    5.25
  -2   1  -1  307.96    7.42
  -2  -1  -1  296.50    8.70
  -2  -1  -1  305.25    5.19
   2   1   2  151.01    3.60
  -2   1  -2  162.77    4.75
  -2  -1  -2  159.08    6.33
  -2  -1  -2  157.54    3.49
   2  -1   2  173.18    4.94
   2   1   3   26.50    2.30
  -2   1  -3   29.66    2.76
   2  -1   3   25.10    2.94
  -2  -1  -3   24.21    3.19
   2   1   4    7.93    2.31
  -2   1  -4    5.62    2.73
   2  -1   4   11.52    2.89
  -2  -1  -4   10.45    3.37
   2   1   5  466.90   11.34
  -2   1  -5  444.19   11.86
   2  -1   5  440.26   14.93
  -2  -1  -5  448.91   10.65
   2   1   6  108.42    4.37
  -2   1  -6  112.92    4.84
   2  -1   6  108.11    5.03
  -2  -1  -6  108.99    4.18
   2   1   7  923.24   27.36
  -2   1  -7  924.81   27.68
   2  -1   7  900.97   28.69
  -2  -1  -7  873.17   25.91
   2   1   8   10.33    3.35
  -2   1  -8    9.55    3.52
   2  -1   8    6.47    5.76
  -2  -1  -8   11.70    3.27
   2   1   9  242.67   10.70
  -2   1  -9  234.34    8.28
   2  -1   9  242.06    8.94
  -2  -1  -9  229.38    9.92
   2   1  10  250.27    9.38
  -2   1 -10  263.83    9.14
   2  -1  10  239.08    9.69
  -2  -1 -10  252.78    8.45
   2   1  11    5.15    4.36
  -2   1 -11    2.42    4.14
   2  -1  11    2.22    4.74
  -2  -1 -11    1.18    3.84
   2   1  12   24.89    5.29
  -2   1 -12   23.86    4.86
   2  -1  12   20.46    5.66
  -2  -1 -12   18.05    4.38
   2   1  13   17.64    5.50
  -2   1 -13    6.31    7.29
   2  -1  13   18.87    5.60
  -2  -1 -13   14.99    4.64
   2   1  14    0.64    5.25
  -2   1 -14   -4.21    4.97
   2  -1  14    0.61    5.80
  -2  -1 -14    6.05    7.32
   2   1  15  275.01   17.67
  -2   1 -15  251.89   11.27
   2  -1  15  251.55   12.97
  -2  -1 -15  237.75   10.81
   2   1  16   27.42    7.17
  -2   1 -16   18.88    5.92
   2  -1  16   12.68    7.24
  -2  -1 -16   19.20    5.70
   2   1  17  388.25   19.14
  -2   1 -17  363.09   16.60
   2  -1  17  352.81   18.51
  -2  -1 -17  350.85   15.58
   2   1  18   12.77    7.88
  -2   1 -18    3.84    6.73
   2  -1  18   -4.99    8.08
  -2  -1 -18   14.63    6.58
   2   1  19  111.80   11.93
  -2   1 -19  121.46    9.87
   2  -1  19  101.68   11.74
  -2  -1 -19  112.25   14.28
   2   1  20    7.75   14.30
  -2   1 -20    6.69    7.47
   2  -1  20   23.43   14.08
  -2  -1 -20   15.47    7.35
   2   1  21    9.81    9.55
  -2   1 -21    0.79    7.52
   2  -1  21   17.68   14.96
  -2  -1 -21    5.72    7.77
   2   1  22    6.13   10.69
  -2   1 -22    7.35   12.97
   2  -1  22   24.52   11.23
  -2  -1 -22   13.51    8.68
   2   1  23   15.05   11.00
  -2   1 -23    9.26    8.84
   2  -1  23   19.03   11.67
  -2  -1 -23   13.37    8.97
   2   1  24   17.68   11.81
  -2   1 -24    7.83    9.67
   2  -1  24   23.39   12.70
  -2  -1 -24   21.25   13.99
   2   1  25   47.17   22.09
  -2   1 -25   33.97   11.06
   2  -1  25   26.55   14.49
  -2  -1 -25   60.80   10.88
   2   1  26   36.62   14.28
  -2   1 -26   14.29   10.57
   2  -1  26   23.22   14.46
  -2  -1 -26   17.42   11.13
   2   2 -28    8.40    9.29
  -2   2  28    7.82   12.33
   2  -2 -28    9.91   10.26
  -2  -2  28   10.26   12.86
   2   2 -27    9.22    8.54
  -2   2  27   -5.70   17.98
   2  -2 -27   23.93   14.44
  -2  -2  27    4.40   11.58
   2   2 -26   99.20   10.61
  -2   2  26   90.62   13.86
   2  -2 -26   85.51   16.96
  -2  -2  26   88.83   14.02
   2   2 -25    7.74   11.77
  -2   2  25   30.10   10.68
   2  -2 -25    5.95    8.40
  -2  -2  25    1.48   10.35
   2   2 -24   64.04    8.89
  -2   2  24   45.90   17.03
   2  -2 -24   74.46    9.75
  -2  -2  24   54.60   17.13
   2   2 -23   15.46    6.65
  -2   2  23    2.62    8.62
   2  -2 -23    4.60    7.50
  -2  -2  23   14.51   13.43
   2   2 -22   36.94    6.98
  -2   2  22   42.69    8.97
   2  -2 -22   35.79    7.79
  -2  -2  22   39.77    9.10
   2   2 -21   81.55   10.65
  -2   2  21   83.34   13.90
   2  -2 -21   64.68    8.13
  -2  -2  21   63.12    9.42
   2   2 -20   11.50    5.46
  -2   2  20   12.65    7.20
   2  -2 -20    6.74    6.10
  -2  -2  20    6.07    7.05
   2   2 -19   35.71    5.70
  -2   2  19   30.35    7.61
   2  -2 -19   29.61    6.28
  -2  -2  19   41.73    7.24
   2   2 -18   30.24    5.05
  -2   2  18   30.39    9.69
   2  -2 -18   30.94    5.85
  -2  -2  18   20.17    6.49
   2   2 -17  387.90   16.94
  -2   2  17  355.11   15.16
   2  -2 -17  362.95   14.33
  -2  -2  17  388.37   20.17
   2   2 -16   37.91    4.58
  -2   2  16   25.16    5.49
   2  -2 -16   29.09    5.08
  -2  -2  16   38.52    7.98
   2   2 -15   64.10    4.61
  -2   2  15   63.63    5.74
   2  -2 -15   53.83    5.10
  -2  -2  15   59.83    8.04
   2   2 -14  132.66    7.89
  -2   2  14  156.38    7.13
   2  -2 -14  130.98    6.36
  -2  -2  14  134.81    6.66
   2   2 -13   12.00    3.45
  -2   2  13   16.03    4.02
   2  -2 -13   19.92    3.92
  -2  -2  13   20.82    3.88
   2   2 -12  309.20    8.83
  -2   2  12  327.61   10.17
   2  -2 -12  273.36    9.17
  -2  -2  12  313.07    9.51
   2   2 -11  400.28   12.52
  -2   2  11  412.24   12.03
   2  -2 -11  397.56   13.84
  -2  -2  11  390.80   13.32
   2   2 -10   17.10    2.48
  -2   2  10   18.62    3.21
   2  -2 -10   20.81    3.20
  -2  -2  10   21.03    4.51
   2   2  -9  468.18   10.94
  -2   2   9  476.61   14.82
   2  -2  -9  465.75   12.30
  -2  -2   9  484.73   12.24
   2   2  -8    6.71    1.91
  -2   2   8    7.76    2.51
   2  -2  -8    4.63    2.51
  -2  -2   8    3.87    2.18
  -2   2   7 1060.09   30.62
   2  -2  -7 1062.19   33.14
  -2  -2   7 1105.77   29.90
   2   2  -6  610.58   13.45
  -2   2   6  630.70   16.76
   2  -2  -6  606.72   16.40
  -2  -2   6  632.92   13.58
   2   2  -5   95.77    2.85
  -2   2   5  102.14    3.27
   2  -2  -5   98.11    4.50
  -2  -2   5   85.33    3.10
   2   2  -4  901.03   26.96
   2   2  -4  942.26   18.98
  -2   2   4  890.45   24.46
   2  -2  -4  882.74   22.19
   2   2  -3   16.75    3.33
   2   2  -3   16.65    0.99
  -2   2   3   13.17    3.09
   2   2  -3   17.65    1.26
  -2  -2   3   18.44    3.25
   2  -2  -3   15.97    3.23
   2   2  -2   72.13    4.31
  -2   2   2   83.61    3.99
   2  -2  -2   90.60    4.19
  -2  -2   2   76.73    4.46
   2   2  -1   53.72    4.31
  -2   2   1   58.21    2.67
   2  -2  -1   68.73    4.01
  -2  -2   1   63.27    4.35
  -2  -2   1   56.62    1.19
   2   2   0   16.79    3.80
   2   2   0   17.17    1.59
  -2   2   0   17.53    2.19
  -2  -2   0   18.53    3.74
  -2  -2   0   16.35    1.60
   2   2   1  200.11   10.38
   2   2   1  208.06    3.87
  -2  -2  -1  201.69    7.85
  -2  -2  -1  198.23    4.44
   2   2   2  437.34    8.68
  -2   2  -2  433.94   14.41
  -2  -2  -2  435.10   14.16
  -2  -2  -2  440.71    8.63
   2   2   3  174.92    5.37
  -2   2  -3  193.06    6.34
   2  -2   3  185.73    6.46
  -2  -2  -3  189.19    5.43
   2   2   4  118.58    3.74
  -2   2  -4  109.58    6.93
   2  -2   4  117.72    5.35
  -2  -2  -4  104.27    3.40
   2   2   5  385.09   11.21
  -2   2  -5  401.72   11.00
   2  -2   5  375.16   11.27
  -2  -2  -5  366.73    8.84
   2   2   6  117.37    4.41
  -2   2  -6  120.47    5.31
   2  -2   6  124.11    7.91
  -2  -2  -6  116.44    5.70
   2   2   7    3.23    3.03
  -2   2  -7    0.49    3.35
   2  -2   7   -0.51    3.86
  -2  -2  -7   -6.96    4.13
   2   2   8  275.14   11.00
  -2   2  -8  255.02   11.24
   2  -2   8  237.59   12.22
  -2  -2  -8  249.32    7.64
   2   2   9  710.35   22.99
  -2   2  -9  783.23   24.55
   2  -2   9  760.29   25.72
  -2  -2  -9  701.90   21.76
   2   2  10  751.94   25.63
  -2   2 -10  811.03   26.48
   2  -2  10  766.64   28.23
  -2  -2 -10  803.35   28.91
   2   2  11  488.33   20.85
  -2   2 -11  516.65   21.65
   2  -2  11  513.86   19.38
  -2  -2 -11  489.66   19.27
   2   2  12    9.30    4.78
  -2   2 -12   10.03    4.82
   2  -2  12   15.13    8.50
  -2  -2 -12   16.81    6.49
   2   2  13  174.89    9.17
  -2   2 -13  173.89   12.28
   2  -2  13  159.22   13.31
  -2  -2 -13  167.94    8.09
   2   2  14  115.39    7.87
  -2   2 -14  111.30    7.61
   2  -2  14  109.03   12.52
  -2  -2 -14   91.71    7.16
   2   2  15  260.24   18.80
  -2   2 -15  299.35   13.73
   2  -2  15  297.47   14.90
  -2  -2 -15  293.25   12.40
   2   2  16   34.32    7.83
  -2   2 -16   43.43    6.69
   2  -2  16   42.73    8.04
  -2  -2 -16   43.11    6.63
   2   2  17   11.26    7.39
  -2   2 -17    6.08    6.32
   2  -2  17   14.99    7.78
  -2  -2 -17    3.47    6.50
   2   2  18  129.15   10.71
  -2   2 -18  123.12   13.93
   2  -2  18  106.87   16.80
  -2  -2 -18  102.34    9.45
   2   2  19   15.01   13.22
  -2   2 -19   13.86    7.49
   2  -2  19   23.69   13.62
  -2  -2 -19   18.19   10.92
   2   2  20   21.59    9.83
  -2   2 -20   22.27    8.01
   2  -2  20   32.02   14.94
  -2  -2 -20   16.70    7.65
   2   2  21   80.39   13.22
  -2   2 -21  108.44   15.88
   2  -2  21   99.09   20.17
  -2  -2 -21  118.54   10.30
   2   2  22   -3.40   10.36
  -2   2 -22    0.74    8.08
   2  -2  22   15.73   10.95
  -2  -2 -22    7.80    8.44
   2   2  23   95.42   21.13
  -2   2 -23   92.61   11.51
   2  -2  23   89.81   14.70
  -2  -2 -23   86.30   11.72
   2   2  24    4.19   11.57
  -2   2 -24   12.42   14.52
   2  -2  24   -5.99   12.57
  -2  -2 -24   13.90    9.26
   2   2  25   38.16   13.98
  -2   2 -25   30.07   10.97
   2  -2  25   33.98   14.13
  -2  -2 -25   31.21   16.62
   2   2  26   46.42   15.41
  -2   2 -26   57.33   12.33
   2  -2  26   59.86   16.36
  -2  -2 -26   57.29   12.47
   2   3 -27   10.94    8.75
  -2   3  27   13.74   12.00
   2  -3 -27   10.51    9.75
  -2  -3  27    1.47   11.99
   2   3 -26   22.95    8.41
  -2   3  26   27.66   17.97
   2  -3 -26   27.06   10.03
  -2  -3  26   27.94   11.98
   2   3 -25   14.50    7.84
  -2   3  25   16.47   10.43
   2  -3 -25   10.68    9.15
  -2  -3  25   14.23   10.89
   2   3 -24   17.36   10.68
  -2   3  24    1.15    9.62
   2  -3 -24    3.72    8.10
  -2  -3  24   -4.44    9.59
   2   3 -23   19.55    7.04
  -2   3  23   32.82   14.58
   2  -3 -23   29.43    8.37
  -2  -3  23   19.49   14.57
   2   3 -22   46.06    7.34
  -2   3  22   38.28    9.62
   2  -3 -22   48.12    8.33
  -2  -3  22   52.66   14.71
   2   3 -21   12.94    9.34
  -2   3  21   10.07    8.25
   2  -3 -21   17.46    7.29
  -2  -3  21   32.45   12.11
   2   3 -20  109.49    7.91
  -2   3  20  112.07   14.22
   2  -3 -20   91.42    8.88
  -2  -3  20  105.43    9.93
   2   3 -19    8.58    5.30
  -2   3  19   13.30    6.58
   2  -3 -19   19.60    6.02
  -2  -3  19    6.79    6.76
   2   3 -18  332.37   16.58
  -2   3  18  324.52   20.11
   2  -3 -18  317.92   14.09
  -2  -3  18  304.19   14.97
   2   3 -17   -3.69    4.38
  -2   3  17    2.96    5.75
   2  -3 -17   -6.68    5.18
  -2  -3  17    4.59    5.64
   2   3 -16   36.89    4.82
  -2   3  16   42.23    5.96
   2  -3 -16   30.35    5.62
  -2  -3  16   33.28    5.77
   2   3 -15  148.05    9.17
  -2   3  15  150.84    7.94
   2  -3 -15  148.10    7.43
  -2  -3  15  154.03    7.98
   2   3 -14   70.13    4.70
  -2   3  14   72.36    5.77
   2  -3 -14   70.52    5.56
  -2  -3  14   76.08    8.16
   2   3 -13   21.60    3.34
  -2   3  13    9.24    4.24
   2  -3 -13   12.27    4.19
  -2  -3  13   19.17    6.39
   2   3 -12  140.01    5.47
  -2   3  12  128.51    8.59
   2  -3 -12  145.21    8.70
  -2  -3  12  136.85    6.23
   2   3 -11   27.13    3.07
  -2   3  11   23.88    3.82
   2  -3 -11   27.12    3.75
  -2  -3  11   28.14    3.78
   2   3 -10  795.97   21.32
  -2   3  10  724.31   22.17
   2  -3 -10  763.92   22.96
  -2  -3  10  740.63   25.02
   2   3  -9   52.58    2.96
  -2   3   9   50.50    3.89
   2  -3  -9   59.12    3.93
  -2  -3   9   51.18    3.44
   2   3  -8  486.61   13.42
  -2   3   8  502.26   16.23
   2  -3  -8  540.35   14.24
  -2  -3   8  513.43   13.14
   2   3  -7    4.70    1.90
  -2   3   7    0.04    4.15
   2  -3  -7    7.51    2.71
  -2  -3   7    3.21    2.37
   2   3  -6  237.44    5.12
  -2   3   6  219.89    8.11
   2  -3  -6  222.55    6.41
   2   3  -5  262.51   11.38
   2   3  -5  246.00    5.16
  -2   3   5  245.55    6.53
   2  -3  -5  259.77    6.81
   2   3  -4   32.34    3.79
   2   3  -4   24.62    1.31
   2   3  -4   23.75    1.74
  -2   3   4   25.89    2.66
   2  -3  -4   23.51    2.76
   2   3  -3    5.32    5.35
   2   3  -3    4.71    1.41
  -2   3   3    2.22    3.57
   2  -3  -3    4.37    2.36
  -2  -3   3    8.92    5.00
   2   3  -2  401.08   12.22
   2   3  -2  387.69    7.09
  -2   3   2  408.53    9.38
   2  -3  -2  375.09    9.26
  -2  -3   2  387.73   11.67
  -2  -3   2  394.66    6.89
   2   3  -1  146.61    6.44
  -2   3   1  153.07    4.47
   2   3  -1  140.52    2.68
  -2  -3   1  151.25    6.36
   2  -3  -1  141.76    4.63
  -2  -3   1  148.26    3.54
   2   3   0   16.19    4.18
   2   3   0    9.52    2.03
  -2   3   0   14.82    3.73
  -2  -3   0   21.00    4.16
  -2  -3   0   11.84    1.37
   2   3   1  294.80   14.06
   2   3   1  309.87    6.12
  -2   3  -1  297.16    7.85
  -2  -3  -1  312.52   11.35
  -2  -3  -1  308.50    6.03
   2   3   2  914.87   22.02
  -2  -3  -2  901.25   31.81
  -2  -3  -2  885.73   23.10
   2   3   3    6.83    2.01
  -2   3  -3   14.40    5.56
  -2  -3  -3   14.10    7.78
  -2  -3  -3   10.14    2.99
   2   3   4  402.54    9.45
  -2   3  -4  409.63   12.30
  -2  -3  -4  397.75    9.28
   2   3   5   19.78    4.01
  -2   3  -5   18.69    3.79
  -2  -3  -5   18.00    2.58
   2   3   6   38.52    3.20
  -2   3  -6   41.30    4.26
   2  -3   6   48.80    7.49
  -2  -3  -6   39.28    3.16
   2   3   7    0.41    3.02
  -2   3  -7    1.49    3.92
   2  -3   7  -10.33    4.51
  -2  -3  -7   -2.63    4.26
   2   3   8   15.63    3.44
  -2   3  -8   12.73    4.18
   2  -3   8    2.93    7.30
  -2  -3  -8    9.54    3.26
   2   3   9  124.03    8.35
  -2   3  -9  139.87    6.81
   2  -3   9  119.95    7.50
  -2  -3  -9  125.52    5.54
   2   3  10  464.76   15.11
  -2   3 -10  490.13   20.42
   2  -3  10  447.42   22.33
  -2  -3 -10  466.14   14.54
   2   3  11    3.87    4.51
  -2   3 -11    2.66    4.90
   2  -3  11    8.09    5.53
  -2  -3 -11    1.07    3.83
   2   3  12  885.30   38.08
  -2   3 -12  867.63   32.38
   2  -3  12  779.15   33.53
  -2  -3 -12  832.42   29.15
   2   3  13   19.67    5.89
  -2   3 -13   13.50    5.72
   2  -3  13   19.87    6.83
  -2  -3 -13   19.06    4.74
   2   3  14  292.83   13.14
  -2   3 -14  279.31   12.77
   2  -3  14  307.44   15.11
  -2  -3 -14  281.31   12.02
   2   3  15   14.77    9.71
  -2   3 -15   11.59    6.31
   2  -3  15    9.16    7.70
  -2  -3 -15    4.49    5.82
   2   3  16  199.02   11.96
  -2   3 -16  201.65   11.46
   2  -3  16  212.28   13.57
  -2  -3 -16  197.12   10.91
   2   3  17   50.39    8.48
  -2   3 -17   36.26    7.66
   2  -3  17   49.94   14.22
  -2  -3 -17   42.32    7.05
   2   3  18    8.96    7.85
  -2   3 -18    6.71   10.45
   2  -3  18    1.88   13.37
  -2  -3 -18   13.18    6.64
   2   3  19   91.00   11.20
  -2   3 -19   76.97    9.60
   2  -3  19   97.61   18.02
  -2  -3 -19   97.85   13.85
   2   3  20  104.75   12.72
  -2   3 -20  107.14   11.20
   2  -3  20  136.10   20.47
  -2  -3 -20  118.47   15.61
   2   3  21   14.46   10.17
  -2   3 -21   25.51    8.46
   2  -3  21   26.50   10.79
  -2  -3 -21   20.43    8.84
   2   3  22   81.53   19.77
  -2   3 -22   85.69   11.58
   2  -3  22  117.78   14.58
  -2  -3 -22  100.53   11.36
   2   3  23    8.66   11.18
  -2   3 -23   13.60   13.84
   2  -3  23   12.38   12.26
  -2  -3 -23    0.49    9.11
   2   3  24   98.10   14.95
  -2   3 -24   67.26   11.74
   2  -3  24   68.98   16.05
  -2  -3 -24   63.83   12.09
   2   3  25   28.39   13.40
  -2   3 -25   29.27   10.81
   2  -3  25    6.09   14.90
  -2  -3 -25   20.06   10.70
   2   3  26   89.26   23.92
  -2   3 -26   60.68   18.55
   2  -3  26   45.32   17.23
  -2  -3 -26   65.67   19.54
   2   4 -27   18.90    8.89
  -2   4  27    7.60   12.42
   2  -4 -27   29.26   10.83
  -2  -4  27    5.14   12.92
   2   4 -26   -5.04   12.94
  -2   4  26   12.35   12.03
   2  -4 -26    1.72   10.06
  -2  -4  26   15.96   11.39
   2   4 -25   58.36    9.46
  -2   4  25   90.12   19.13
   2  -4 -25   62.16   11.26
  -2  -4  25   61.47   13.07
   2   4 -24   11.77    7.17
  -2   4  24   14.83   10.31
   2  -4 -24    8.62    8.80
  -2  -4  24    0.94   10.21
   2   4 -23    5.90   10.62
  -2   4  23    5.96    9.41
   2  -4 -23   11.91    8.38
  -2  -4  23    7.71    9.67
   2   4 -22    6.81    6.46
   2  -4 -22    7.96    7.88
  -2  -4  22    2.74    9.00
   2   4 -21  138.26    9.31
  -2   4  21  142.40   12.28
   2  -4 -21  112.57   10.59
  -2  -4  21  140.65   12.41
   2   4 -20   26.44    9.41
  -2   4  20   27.00    8.32
   2  -4 -20   32.11    7.61
  -2  -4  20   21.26    8.48
   2   4 -19  234.82   11.22
  -2   4  19  211.21   13.14
   2  -4 -19  222.46   12.59
  -2  -4  19  212.34   13.57
   2   4 -18   11.57    5.24
  -2   4  18   11.17    6.87
   2  -4 -18   17.43    6.32
  -2  -4  18   23.53    6.85
   2   4 -17  196.58    9.38
  -2   4  17  188.82   15.42
   2  -4 -17  204.23   10.95
  -2  -4  17  213.06   11.40
   2   4 -16   11.14    4.31
  -2   4  16   13.10    5.60
   2  -4 -16   -3.83    5.39
  -2  -4  16   15.08    5.72
   2   4 -15   73.33    7.90
  -2   4  15   66.93    9.48
   2  -4 -15   57.25    6.19
  -2  -4  15   68.44    6.47
   2   4 -14    2.54    3.63
  -2   4  14   -1.56    4.59
   2  -4 -14    2.19    4.64
  -2  -4  14    4.92    7.20
   2   4 -13   43.98    4.13
  -2   4  13   23.57    5.23
   2  -4 -13   38.47    7.43
  -2  -4  13   27.75    5.01
   2   4 -12   35.97    3.69
  -2   4  12   39.41    4.96
   2  -4 -12   30.61    4.52
  -2  -4  12   40.15    4.87
  -2   4  11  141.81    6.56
   2  -4 -11  127.38    6.31
  -2  -4  11  145.74    8.82
   2   4 -10   13.61    2.96
  -2   4  10   15.97    3.91
   2  -4 -10   14.43    5.81
  -2  -4  10   14.55    3.69
   2   4  -9  595.50   16.04
  -2   4   9  649.05   21.96
   2  -4  -9  577.70   17.85
  -2  -4   9  580.99   17.48
   2   4  -8   20.87    2.64
  -2   4   8   21.68    3.48
   2  -4  -8   26.25    5.50
   2   4  -7  298.56   11.05
   2   4  -7  307.84    7.66
  -2   4   7  300.09    8.78
   2  -4  -7  310.20    9.13
   2   4  -6   18.61    4.40
   2   4  -6   17.03    2.45
  -2   4   6   18.69    3.14
   2  -4  -6   16.35    3.06
   2   4  -5  106.15    5.91
   2   4  -5  110.49    3.82
  -2   4   5  106.11    4.49
   2  -4  -5  115.39    4.77
   2   4  -4  255.96   11.92
   2   4  -4  239.10    5.75
  -2   4   4  249.62    7.17
   2  -4  -4  247.66    7.30
   2   4  -3   40.71    4.65
  -2   4   3   48.74    4.69
   2   4  -3   41.73    2.49
  -2  -4   3   49.70    4.53
   2  -4  -3   32.74    3.30
   2   4  -2   35.48    2.53
   2   4  -2   39.22    4.79
  -2   4   2   32.70    3.10
   2  -4  -2   37.53    3.24
  -2  -4   2   36.35    4.56
  -2  -4   2   35.01    2.00
   2  -4  -2   36.47    3.27
   2   4  -1  130.07    6.70
   2   4  -1  130.84    4.03
  -2   4   1  131.22    4.66
   2  -4  -1  117.97    3.66
   2  -4  -1  124.01    6.65
  -2  -4   1  132.71    6.52
  -2  -4   1  123.76    3.20
   2   4   0    8.74    4.61
  -2   4   0    7.74    2.79
   2   4   0   11.42    1.77
  -2  -4   0   19.32    6.93
   2  -4   0    8.77    1.46
  -2  -4   0   11.87    1.84
   2   4   1 1499.23   64.19
   2   4   1 1547.24   50.70
  -2   4  -1 1575.27   44.48
  -2   4  -1 1579.16   59.88
  -2  -4  -1 1486.93   63.41
  -2  -4  -1 1555.55   48.78
   2   4   2 1418.99   46.05
  -2   4  -2 1410.79   39.58
  -2   4  -2 1378.00   48.06
  -2  -4  -2 1340.17   57.02
  -2  -4  -2 1407.00   43.36
   2   4   3 2734.73  123.51
  -2   4  -3 2706.41  111.86
  -2  -4  -3 2487.45  153.11
  -2  -4  -3 2669.57  117.39
   2   4   4  403.11   11.80
  -2   4  -4  405.69   13.54
  -2  -4  -4  374.42   20.87
  -2  -4  -4  385.41    9.76
   2   4   5  177.41    5.69
  -2   4  -5  178.90    7.74
  -2  -4  -5  164.87   10.43
  -2  -4  -5  166.42    5.25
   2   4   6    4.98    2.87
  -2   4  -6    6.14    4.46
  -2  -4  -6    1.09    2.86
   2   4   7   36.74    5.41
  -2   4  -7   37.17    4.95
  -2  -4  -7   40.40    5.29
   2   4   8   11.89    3.65
  -2   4  -8   12.32    4.77
   2  -4   8   12.19    5.37
  -2  -4  -8   10.79    3.50
   2   4   9  768.74   28.42
  -2   4  -9  757.58   31.58
   2  -4   9  731.09   29.51
  -2  -4  -9  733.67   23.46
   2   4  10   -2.31    4.24
  -2   4 -10    2.33    4.84
   2  -4  10    3.83    5.70
  -2  -4 -10    1.41    3.86
   2   4  11  219.82    9.22
  -2   4 -11  205.29    9.84
   2  -4  11  220.31   11.89
  -2  -4 -11  219.57   11.82
   2   4  12   63.49    6.01
  -2   4 -12   60.27    6.47
   2  -4  12   63.01   12.16
  -2  -4 -12   56.41    8.50
   2   4  13  400.17   16.59
  -2   4 -13  443.97   17.40
   2  -4  13  420.13   25.30
  -2  -4 -13  375.66   15.10
   2   4  14    1.53    5.81
  -2   4 -14    8.31    5.91
   2  -4  14   -4.52    7.30
  -2  -4 -14    5.87    5.37
   2   4  15  370.04   18.02
  -2   4 -15  384.58   22.80
   2  -4  15  360.54   20.05
  -2  -4 -15  390.23   16.33
   2   4  16    6.33    7.34
  -2   4 -16    5.48    6.70
   2  -4  16    2.86    8.32
  -2  -4 -16    9.43    5.96
   2   4  17   19.66    7.45
  -2   4 -17    6.19    7.03
   2  -4  17    7.26    8.99
  -2  -4 -17    8.78    6.81
   2   4  18   12.20    8.16
  -2   4 -18   -0.61    7.47
   2  -4  18    7.29    9.33
  -2  -4 -18    3.37    6.97
   2   4  19  104.41   11.16
  -2   4 -19   83.21   10.24
   2  -4  19   83.27   13.27
  -2  -4 -19   88.17   14.86
   2   4  20    8.60    9.46
  -2   4 -20    7.26   11.61
   2  -4  20    1.97   10.95
  -2  -4 -20    4.76   12.05
   2   4  21  164.24   22.62
  -2   4 -21  160.41   13.51
   2  -4  21  139.16   16.84
  -2  -4 -21  151.20   18.81
   2   4  22    5.56   10.99
  -2   4 -22   16.61   13.53
   2  -4  22   11.23   12.02
  -2  -4 -22    6.72    8.88
   2   4  23  114.65   16.35
  -2   4 -23  120.05   13.18
   2  -4  23  136.89   17.71
  -2  -4 -23  119.11   13.14
   2   4  24   -6.26   12.29
  -2   4 -24    2.22   10.13
   2  -4  24   14.51   13.88
  -2  -4 -24   13.52   10.20
   2   4  25   20.44   13.94
  -2   4 -25   10.65   15.75
   2  -4  25   11.52   14.87
  -2  -4 -25   21.34   11.03
   2   5 -26   22.93    8.72
  -2   5  26   11.10   19.49
   2  -5 -26   26.49   16.20
  -2  -5  26   15.83   12.88
   2   5 -25   11.40   12.01
  -2   5  25   12.52   11.53
   2  -5 -25    1.42   15.24
  -2  -5  25    6.72   11.52
   2   5 -24   -6.98    7.53
  -2   5  24   -0.90   10.42
   2  -5 -24   -0.16   13.89
  -2  -5  24    6.13   10.56
   2   5 -23   21.16    7.29
  -2   5  23   16.54   10.11
   2  -5 -23   -1.26   13.74
  -2  -5  23   13.79   10.43
   2   5 -22   14.10   10.62
  -2   5  22   24.19    9.14
   2  -5 -22    8.17   13.23
  -2  -5  22   13.17    9.77
   2   5 -21   16.31    6.72
  -2   5  21    3.33   13.45
   2  -5 -21   31.96   12.42
  -2  -5  21   28.62    9.14
   2   5 -20   56.40    7.34
  -2   5  20   58.52    9.67
   2  -5 -20   48.91   13.20
  -2  -5  20   63.87    9.64
   2   5 -19    8.52    5.60
  -2   5  19   10.14    7.73
   2  -5 -19   26.95   10.84
  -2  -5  19   21.65   12.03
   2   5 -18  168.17    8.81
  -2   5  18  163.93   11.39
   2  -5 -18  149.97   10.89
  -2  -5  18  152.59   16.08
   2   5 -17   10.28    7.82
  -2   5  17    9.42    7.00
   2  -5 -17   20.11    6.50
  -2  -5  17   12.41   10.80
   2   5 -16   94.84    6.50
  -2   5  16   83.73    8.15
   2  -5 -16   83.22    7.98
  -2  -5  16   85.18    8.39
   2   5 -15   91.52    6.23
  -2   5  15   89.62    7.75
   2  -5 -15   96.87    7.47
  -2  -5  15   80.75    7.93
   2   5 -14   87.55    5.71
  -2   5  14   88.83    7.25
   2  -5 -14   86.68    6.99
  -2  -5  14  100.10   10.52
   2   5 -13  171.98    7.02
  -2   5  13  148.96    8.23
   2  -5 -13  151.35   11.71
  -2  -5  13  155.81    8.80
   2   5 -12   61.08    6.67
  -2   5  12   64.24    5.77
   2  -5 -12   49.55    5.83
   2   5 -11   43.28    5.96
  -2   5  11   33.66    7.35
   2  -5 -11   39.83    5.18
   2   5 -10  339.74   12.65
  -2   5  10  341.19   11.83
   2  -5 -10  334.19   14.94
   2   5  -9    2.74    5.10
   2   5  -9    2.40    4.43
  -2   5   9   -1.04    3.93
   2  -5  -9    6.01    4.04
   2   5  -8  502.72   19.47
   2   5  -8  512.55   16.89
  -2   5   8  520.80   16.23
   2  -5  -8  502.76   19.58
   2   5  -7   26.62    8.15
   2   5  -7   33.58    3.37
  -2   5   7   39.82    6.13
   2  -5  -7   32.20    4.30
   2   5  -6  171.12   11.65
   2   5  -6  178.38    4.89
   2   5  -6  169.75    7.63
  -2   5   6  179.58    8.68
   2  -5  -6  186.94    6.93
   2   5  -5    6.08    7.08
   2   5  -5    6.98    2.91
   2   5  -5    0.09    2.96
  -2   5   5   -2.72    5.09
   2  -5  -5    7.40    3.43
   2   5  -4   83.27    6.55
   2   5  -4   89.94    3.02
  -2   5   4   96.36    4.80
   2  -5  -4   89.21    6.85
   2   5  -3  102.38    4.25
   2   5  -3  104.17    6.79
  -2   5   3   94.99    4.74
   2  -5  -3  103.16    6.10
  -2  -5   3   92.54    6.19
   2  -5  -3   96.42    6.84
   2   5  -2  209.84    5.04
   2   5  -2  180.05    9.33
  -2   5   2  194.02    9.11
   2  -5  -2  214.64    5.82
  -2  -5   2  191.59    8.69
   2  -5  -2  210.48    9.45
   2   5  -1  594.87   26.03
   2   5  -1  576.19   13.69
  -2   5   1  593.35   19.45
   2  -5  -1  585.29   13.36
   2  -5  -1  566.88   20.27
  -2  -5   1  598.31   25.01
  -2  -5   1  574.10   14.07
   2   5   0  270.58   11.64
  -2   5   0  268.90   10.57
   2   5   0  274.83    7.93
  -2  -5   0  252.05   10.95
   2  -5   0  270.62    5.46
  -2  -5   0  270.99    6.75
   2   5   1  332.19   13.83
   2   5   1  329.92    8.11
  -2   5  -1  317.42   12.77
  -2  -5  -1  320.97   12.87
  -2  -5  -1  328.70    8.14
   2   5   2 2746.51  128.15
  -2   5  -2 2899.33  127.68
  -2   5  -2 2749.56  146.08
  -2  -5  -2 2813.31  175.72
  -2  -5  -2 2776.23  130.23
   2   5   3  123.76    6.35
  -2   5  -3  126.67    4.80
  -2   5  -3  135.44    9.04
  -2  -5  -3  124.92   12.73
  -2  -5  -3  126.68    4.72
   2   5   4  515.70   15.81
  -2   5  -4  501.93   18.60
  -2   5  -4  510.15   13.64
  -2  -5  -4  507.21   13.70
  -2  -5  -4  459.76   26.52
   2   5   5   18.03    3.26
  -2   5  -5   27.11    5.35
  -2   5  -5   16.99    2.66
  -2  -5  -5   25.50    3.16
  -2  -5  -5   21.96    7.10
   2   5   6  170.47    6.34
  -2   5  -6  175.98    8.53
  -2  -5  -6  189.01   11.66
  -2  -5  -6  179.36    8.50
   2   5   7   28.69    5.65
  -2   5  -7   21.19    5.55
  -2  -5  -7   23.03    3.75
   2   5   8  120.10    5.89
  -2   5  -8  132.10    8.03
  -2  -5  -8  125.84    5.82
   2   5   9   94.66    8.52
  -2   5  -9  103.05    7.25
  -2  -5  -9   90.80    5.70
   2   5  10  308.64   11.71
  -2   5 -10  320.33   17.79
  -2  -5 -10  311.79   11.40
   2   5  11    7.70    7.33
  -2   5 -11    8.00    5.80
  -2  -5 -11    7.96    4.60
   2   5  12  646.47   24.91
  -2   5 -12  647.59   25.97
   2  -5  12  614.73   30.09
  -2  -5 -12  649.70   23.70
   2   5  13   -5.13    5.74
  -2   5 -13   -2.83    9.49
   2  -5  13   -3.29    7.89
  -2  -5 -13   10.79    7.75
   2   5  14   94.29    8.45
  -2   5 -14  118.67    9.01
   2  -5  14   84.99   16.00
  -2  -5 -14   97.86   11.63
   2   5  15   -0.34    6.37
  -2   5 -15    4.59    9.85
   2  -5  15    6.19    8.47
  -2  -5 -15   -4.86    9.10
   2   5  16   30.56    7.39
  -2   5 -16   28.19    7.24
   2  -5  16   11.91    9.45
  -2  -5 -16   30.08    6.95
   2   5  17   43.97    8.90
  -2   5 -17   53.67    8.55
   2  -5  17   58.57   11.10
  -2  -5 -17   43.65    8.21
   2   5  18    6.87    8.57
  -2   5 -18    8.97    8.21
   2  -5  18   10.89   10.64
  -2  -5 -18   14.60    7.36
   2   5  19   -4.30    9.14
  -2   5 -19   10.75   12.03
   2  -5  19   -4.72   10.65
  -2  -5 -19    7.95   11.59
   2   5  20  109.33   13.21
  -2   5 -20   90.13   11.50
   2  -5  20   91.36   15.46
  -2  -5 -20  112.41   16.16
   2   5  21    7.33   10.78
  -2   5 -21   39.24   13.92
   2  -5  21   -9.61   12.19
  -2  -5 -21    0.39   13.65
   2   5  22   26.93   11.53
  -2   5 -22   18.91    9.64
   2  -5  22   29.50   13.64
  -2  -5 -22   -1.58   15.07
   2   5  23   11.86   17.90
  -2   5 -23    1.97    9.58
   2  -5  23    5.52   13.86
  -2  -5 -23   -3.38    9.80
   2   5  24   61.05   14.35
  -2   5 -24   24.32   17.57
   2  -5  24   38.03   15.66
  -2  -5 -24   48.75   11.99
   2   5  25   -1.39   13.81
  -2   5 -25   11.25   10.53
   2  -5  25   35.07   15.38
  -2  -5 -25   -0.87   11.32
   2   6 -25   12.53    8.43
  -2   6  25   18.18   18.81
   2  -6 -25   16.06   10.67
  -2  -6  25   28.15   18.77
   2   6 -24   24.35    8.07
  -2   6  24   12.57   11.12
   2  -6 -24   21.23   10.38
  -2  -6  24   30.55   18.98
   2   6 -23    4.33    7.68
  -2   6  23   -9.80   10.22
   2  -6 -23   18.04    9.25
  -2  -6  23   10.18   16.87
   2   6 -22   41.68    7.85
  -2   6  22   22.54   16.27
   2  -6 -22   37.10   10.12
  -2  -6  22   38.72   17.22
   2   6 -21   23.55   10.41
  -2   6  21   21.19    9.52
   2  -6 -21    8.65    8.69
  -2  -6  21   38.58   15.89
   2   6 -20   36.52    7.20
  -2   6  20   46.07   15.15
   2  -6 -20   52.56    8.81
  -2  -6  20   53.60   10.73
   2   6 -19   26.78    9.39
  -2   6  19   25.12    9.09
   2  -6 -19   52.55   12.48
  -2  -6  19   44.87    9.64
   2   6 -18   -1.80    5.76
  -2   6  18    7.95    7.43
   2  -6 -18    7.89   10.71
  -2  -6  18    7.30    7.89
   2   6 -17   91.88   10.75
  -2   6  17   96.71    9.40
   2  -6 -17   99.39    9.43
  -2  -6  17   93.97    9.78
   2   6 -16   80.73    6.73
  -2   6  16   77.75    8.26
   2  -6 -16   83.66    8.49
   2   6 -15   73.64    8.81
  -2   6  15   56.05    7.68
   2  -6 -15   57.79    7.71
   2   6 -14  162.86    7.76
  -2   6  14  154.93    9.66
   2  -6 -14  154.44    9.95
   2   6 -13   75.64    5.60
  -2   6  13   59.96    7.21
   2  -6 -13   60.93   10.00
   2   6 -12  285.22   15.25
   2   6 -12  303.16   11.13
  -2   6  12  323.93   17.02
   2  -6 -12  297.57   13.03
   2   6 -11   83.06    8.31
   2   6 -11  101.83    8.18
  -2   6  11   87.16    6.70
   2  -6 -11   85.24    6.99
   2   6 -10   12.26    6.33
   2   6 -10    2.76    5.80
  -2   6  10    2.80    4.55
   2  -6 -10    6.36    7.35
   2   6  -9  238.44   16.45
   2   6  -9  245.91   11.65
  -2   6   9  258.97   10.02
   2  -6  -9  270.94   10.25
   2   6  -8   11.02    5.83
   2   6  -8    9.90    4.32
   2   6  -8    9.73    5.83
  -2   6   8   11.89    4.38
   2  -6  -8   15.65    6.72
   2   6  -7   53.38    6.52
   2   6  -7   44.41    4.71
   2   6  -7   44.50    4.34
  -2   6   7   49.20    4.91
   2  -6  -7   51.06    5.00
   2   6  -6  124.27    8.38
   2   6  -6  137.94    6.11
   2   6  -6  126.72    5.90
  -2   6   6  129.75    8.73
   2  -6  -6  143.00    6.72
   2   6  -5   23.42    5.76
   2   6  -5   17.08    3.76
  -2   6   5   12.07    5.89
   2  -6  -5   19.57    6.23
   2   6  -4  153.85    4.63
   2   6  -4  141.93    8.81
  -2   6   4  147.16    6.47
   2  -6  -4  145.64    6.70
   2  -6  -4  144.28    6.72
   2   6  -3    6.39    2.48
   2   6  -3   12.30    5.72
  -2   6   3    7.11    3.69
   2  -6  -3    7.54    5.08
  -2  -6   3   15.06    4.90
   2  -6  -3   13.40    3.84
   2   6  -2  121.21    8.27
   2   6  -2  127.59    4.33
  -2   6   2  127.30    5.84
   2  -6  -2  127.58    4.87
   2  -6  -2  119.41    6.32
  -2  -6   2  105.91    7.23
  -2  -6   2  126.79    4.69
   2   6  -1   22.59    6.20
   2   6  -1   31.97    2.72
  -2   6   1   23.36    4.04
   2  -6  -1   28.19    3.94
   2  -6  -1   32.03    4.31
  -2  -6   1   33.81    5.45
  -2  -6   1   30.05    4.26
   2   6   0   82.49   11.70
   2   6   0   85.14    5.20
  -2   6   0   82.98    5.16
   2  -6   0   84.01    4.15
  -2  -6   0   88.49   10.16
  -2  -6   0   70.15    3.71
   2   6   1  425.18   11.11
  -2   6  -1  432.15   13.00
  -2  -6  -1  418.42   22.87
  -2  -6  -1  401.04   11.07
   2   6   2   22.93    2.97
  -2   6  -2   20.91    3.70
  -2   6  -2   14.56    6.52
  -2  -6  -2    7.38    9.93
   2   6   3  444.36   12.67
  -2   6  -3  444.81   13.08
  -2   6  -3  450.75   17.65
  -2  -6  -3  461.38   25.60
  -2  -6  -3  439.54   12.73
   2   6   4    5.79    3.33
  -2   6  -4    8.78    2.73
  -2   6  -4    6.14    4.15
  -2   6  -4   14.43    5.96
  -2  -6  -4   -5.95   10.57
  -2  -6  -4    2.47    3.37
   2   6   5  518.46   17.98
  -2   6  -5  510.05   14.16
  -2   6  -5  530.34   17.47
  -2   6  -5  526.78   25.67
  -2  -6  -5  502.39   23.80
  -2  -6  -5  499.12   17.94
   2   6   6  208.46    7.55
  -2   6  -6  216.51   15.01
  -2   6  -6  211.34    8.95
  -2  -6  -6  214.94    7.78
  -2  -6  -6  195.40   14.06
   2   6   7   18.12    4.11
  -2   6  -7   12.94    9.39
  -2   6  -7   19.19    3.71
  -2  -6  -7   21.53    6.03
  -2  -6  -7   32.77   13.00
   2   6   8   16.34    4.46
  -2   6  -8   13.60    6.05
  -2  -6  -8   11.82    9.15
  -2  -6  -8   15.12    4.15
   2   6   9  117.95    6.67
  -2   6  -9  111.47    8.37
  -2  -6  -9  104.28    6.47
   2   6  10   65.61    6.12
  -2   6 -10   77.92    7.81
  -2  -6 -10   65.63    6.08
   2   6  11   10.89    5.15
  -2   6 -11   -3.15    9.50
  -2  -6 -11    5.28    4.95
   2   6  12   90.33    7.49
  -2   6 -12   74.93    8.43
  -2  -6 -12   85.12    7.31
   2   6  13   61.58    7.59
  -2   6 -13   71.53    8.25
  -2  -6 -13   59.00    7.12
   2   6  14   36.17    7.17
  -2   6 -14   33.71    7.72
  -2  -6 -14    7.85   10.02
   2   6  15    6.07   10.69
  -2   6 -15    1.57    7.11
  -2  -6 -15   13.37    9.71
   2   6  16   -2.60    7.60
  -2   6 -16   20.75   11.68
  -2  -6 -16   10.49   10.24
   2   6  17   16.10    8.19
  -2   6 -17    5.81    7.85
   2  -6  17    0.00   10.61
  -2  -6 -17   18.25   11.12
   2   6  18   36.40   13.99
  -2   6 -18   26.45   13.32
   2  -6  18   33.98   12.08
  -2  -6 -18   23.90    8.12
   2   6  19    5.54    9.85
  -2   6 -19   13.12    8.75
   2  -6  19   10.24   12.05
  -2  -6 -19   14.73    8.37
   2   6  20   42.94   11.35
  -2   6 -20   56.03   15.58
   2  -6  20   46.67   14.12
  -2  -6 -20   41.16   10.28
   2   6  21   49.60   17.90
  -2   6 -21   36.30   10.58
   2  -6  21   41.12   14.60
  -2  -6 -21   44.43   15.84
   2   6  22    3.34   11.73
  -2   6 -22   12.59   10.01
   2  -6  22   21.01   14.07
  -2  -6 -22    3.39   15.31
   2   6  23   64.73   14.65
  -2   6 -23   70.04   12.14
   2  -6  23   60.20   17.43
  -2  -6 -23   45.76   17.97
   2   6  24   -9.18   13.33
  -2   6 -24    3.50   10.61
   2  -6  24   13.37   15.23
  -2  -6 -24   18.04   17.04
   2   7 -24    8.83    8.36
  -2   7  24   -4.22   11.66
   2  -7 -24    2.11   10.61
   2   7 -23   74.92   10.05
  -2   7  23   76.20   20.42
   2  -7 -23   84.24   13.07
   2   7 -22    4.50    7.38
  -2   7  22   -5.77   11.00
   2  -7 -22   22.81    9.74
   2   7 -21   42.71    7.89
  -2   7  21   33.38   10.79
   2  -7 -21   45.73   10.21
   2   7 -20   30.24   11.30
  -2   7  20    9.40    9.45
   2  -7 -20   25.75    9.34
   2   7 -19   13.68    6.88
  -2   7  19   22.94    9.00
   2  -7 -19   26.26    8.63
   2   7 -18   30.31    9.87
  -2   7  18   16.07    8.60
   2  -7 -18   22.03    8.35
   2   7 -17    4.96    5.82
  -2   7  17   -4.57    8.02
   2  -7 -17   -0.06   11.28
   2   7 -16    9.87    9.39
   2   7 -16    5.10    5.66
  -2   7  16    9.10   10.98
   2  -7 -16    2.70    7.30
   2   7 -15  142.80   13.07
   2   7 -15  142.22   12.17
  -2   7  15  148.09   10.45
   2  -7 -15  132.68   11.04
   2   7 -14    5.37    8.25
   2   7 -14    7.29    5.09
  -2   7  14   -1.72    9.40
   2  -7 -14    3.73    6.74
   2   7 -13  155.69   12.62
   2   7 -13  153.18    8.35
  -2   7  13  150.73    9.43
   2  -7 -13  157.47   14.38
   2   7 -12   61.76    9.35
   2   7 -12   75.22    8.93
  -2   7  12   47.61    7.04
   2  -7 -12   52.26    7.01
   2   7 -11  136.96   16.17
   2   7 -11  136.01   10.17
  -2   7  11  130.28    8.73
   2  -7 -11  142.79    8.80
   2   7 -10   15.84    7.51
   2   7 -10   24.52    3.92
   2   7 -10   22.66    7.13
  -2   7  10   28.73    5.49
   2  -7 -10   23.80    9.07
   2   7  -9   30.13    7.05
   2   7  -9   25.91    3.75
   2   7  -9   24.74    7.00
  -2   7   9    8.03    8.33
   2  -7  -9   20.34    5.76
   2   7  -8   23.03   10.68
   2   7  -8   15.91    3.37
   2   7  -8   26.00    6.97
  -2   7   8   20.89    4.91
   2  -7  -8   13.45    5.41
   2   7  -7  155.41   10.49
   2   7  -7  146.19    5.47
   2   7  -7  154.69   10.45
  -2   7   7  147.13    7.72
   2  -7  -7  149.26    8.14
   2   7  -6   82.98    4.21
   2   7  -6   75.95    8.37
  -2   7   6   72.76    8.45
   2   7  -6   73.28    6.06
   2  -7  -6   87.87   10.15
   2  -7  -6   66.30    9.02
   2   7  -5  264.55    9.67
   2   7  -5  257.95   13.56
  -2   7   5  253.48   10.03
   2  -7  -5  252.23   10.37
   2  -7  -5  249.19   14.32
   2   7  -4   36.40    5.06
   2   7  -4   30.02    7.06
  -2   7   4   47.01    4.87
   2  -7  -4   31.69    5.21
   2  -7  -4   33.26    4.75
   2   7  -3  107.85    8.81
  -2   7   3   96.00    6.12
   2   7  -3   99.57    6.23
   2  -7  -3  115.65    8.03
  -2  -7   3  111.72   11.38
   2  -7  -3  109.67    9.79
   2   7  -2   22.59    6.77
   2   7  -2   15.75    4.74
  -2   7   2   16.07    6.79
   2  -7  -2   22.57    5.13
   2  -7  -2   23.98    5.11
  -2  -7   2   27.24    5.92
  -2  -7   2   17.28    3.53
   2   7  -1  357.61   17.19
   2   7  -1  373.06   12.46
  -2   7   1  362.62   12.12
   2  -7  -1  350.85   11.84
   2  -7  -1  360.79   13.31
  -2  -7   1  383.89   15.85
  -2  -7   1  353.28   10.80
   2   7   0   42.15    7.55
   2   7   0   55.90    5.31
  -2   7   0   45.27    4.83
   2  -7   0   38.89    4.34
  -2  -7   0   50.53    6.73
  -2  -7   0   43.30    3.83
   2   7   1   -0.54    3.05
  -2   7  -1    0.93    4.15
  -2  -7  -1  -12.44    6.36
  -2  -7  -1    5.68    3.22
   2   7   2  132.46    5.62
  -2   7  -2  126.28    6.60
  -2  -7  -2  134.22   10.21
  -2  -7  -2  135.72    5.85
   2   7   3   35.72    3.98
  -2   7  -3   46.00    5.10
  -2   7  -3   31.86    7.27
  -2  -7  -3   55.42    7.92
  -2  -7  -3   31.53    4.15
   2   7   4    5.81    5.45
  -2   7  -4   -1.00    4.68
  -2   7  -4    1.49    4.30
  -2  -7  -4    6.05   11.08
  -2  -7  -4    3.23    5.59
   2   7   5  216.29    8.12
  -2   7  -5  211.31    9.66
  -2   7  -5  222.28    9.59
  -2   7  -5  193.48   11.96
  -2  -7  -5  208.03   14.51
  -2  -7  -5  207.41    8.02
   2   7   6   64.82    5.09
  -2   7  -6   58.04    4.50
  -2   7  -6   84.34    9.03
  -2   7  -6   63.80    7.90
  -2  -7  -6   37.56   10.18
  -2  -7  -6   59.55    5.17
   2   7   7  275.92   10.67
  -2   7  -7  304.26   13.29
  -2   7  -7  284.90   11.88
  -2   7  -7  270.84   13.98
  -2  -7  -7  281.15   25.61
  -2  -7  -7  281.92   10.80
   2   7   8   33.91    5.27
  -2   7  -8   49.16    7.29
  -2   7  -8   36.63    7.04
  -2  -7  -8   37.64    5.21
  -2  -7  -8   41.79   10.74
   2   7   9   82.45    6.72
  -2   7  -9   73.29   12.90
  -2   7  -9   71.72    8.71
  -2  -7  -9   91.22    6.66
  -2  -7  -9  105.70   18.96
   2   7  10    3.61    5.26
  -2   7 -10   10.26    6.96
  -2   7 -10    5.11    4.85
  -2  -7 -10   12.10    7.72
  -2  -7 -10   -4.50   10.79
   2   7  11   11.99    5.63
  -2   7 -11    3.39    7.23
  -2  -7 -11    0.48   11.76
  -2  -7 -11   11.79    5.47
   2   7  12   25.43    6.38
  -2   7 -12   21.82   11.25
  -2  -7 -12   20.84    6.26
   2   7  13   28.60    7.20
  -2   7 -13   39.96    8.44
  -2  -7 -13   37.62    6.87
   2   7  14  -13.64   10.66
  -2   7 -14   -3.04    7.48
  -2  -7 -14    9.61    6.20
   2   7  15   28.47    8.01
  -2   7 -15   29.40   12.87
  -2  -7 -15   20.25   11.14
   2   7  16   12.99    8.26
  -2   7 -16   26.82    8.44
  -2  -7 -16   12.87   11.81
   2   7  17  105.08   11.29
  -2   7 -17  100.19   17.86
  -2  -7 -17   93.36   10.60
   2   7  18   -0.11    8.96
  -2   7 -18   -5.63    8.37
  -2  -7 -18    5.78    8.14
   2   7  19   63.69   17.46
  -2   7 -19   55.77   16.70
  -2  -7 -19   67.26   10.45
   2   7  20   19.48   11.52
  -2   7 -20   32.63    9.90
  -2  -7 -20   17.44    9.66
   2   7  21   24.98   12.28
  -2   7 -21   47.05   16.30
  -2  -7 -21   31.90   10.65
   2   7  22    4.70   11.69
  -2   7 -22    6.14   10.06
  -2  -7 -22   -1.89   10.24
   2   7  23    9.91   13.02
  -2   7 -23   12.52   10.94
  -2  -7 -23   -3.50   11.12
   2   8 -23    0.37    7.96
  -2   8  23   15.23   11.33
   2  -8 -23   -0.55   11.25
   2   8 -22   53.11    9.08
  -2   8  22   57.85   13.64
   2  -8 -22   61.19   12.57
   2   8 -21   11.67   12.75
   2   8 -21   10.09   11.56
  -2   8  21  -11.53   10.13
   2  -8 -21    2.39    9.56
   2   8 -20   57.86   14.05
   2   8 -20   55.59    8.59
  -2   8  20   30.50   11.49
   2  -8 -20   73.66   11.41
   2   8 -19    4.98   11.50
   2   8 -19   11.20   10.64
  -2   8  19    3.68   13.68
   2  -8 -19    2.35    9.08
   2   8 -18    6.42   11.15
   2   8 -18    2.78    6.64
  -2   8  18   16.23    8.67
   2  -8 -18   11.45    9.05
   2   8 -17   18.96   16.28
   2   8 -17    5.31    6.40
  -2   8  17   -8.00   12.71
   2  -8 -17   -2.13    8.29
   2   8 -16   64.86   12.41
   2   8 -16   52.93   10.78
  -2   8  16   75.37    9.66
   2  -8 -16   66.38   14.33
   2   8 -15    7.12    9.94
   2   8 -15   13.18    6.16
  -2   8  15   24.10    7.88
   2  -8 -15    4.09    7.82
   2   8 -14  118.68   19.61
   2   8 -14  133.51    8.74
  -2   8  14  116.08   10.38
   2  -8 -14  116.31   10.58
   2   8 -13   10.46    9.10
   2   8 -13    5.63    4.89
   2   8 -13    7.90    8.42
  -2   8  13    9.34    6.75
   2  -8 -13    1.98    7.07
   2   8 -12  355.41   27.74
   2   8 -12  370.31   14.88
  -2   8  12  371.26   17.06
   2  -8 -12  351.79   23.01
   2   8 -11    2.12    8.53
   2   8 -11   10.01    4.57
   2   8 -11    5.45    5.39
  -2   8  11   23.68    9.89
   2  -8 -11   18.83    6.75
   2   8 -10   66.72   14.97
   2   8 -10   71.02    5.36
   2   8 -10   75.03    6.74
  -2   8  10   73.37    7.47
   2  -8 -10   84.44    7.87
   2   8  -9   -1.49    7.57
   2   8  -9    3.43    5.74
   2   8  -9   -2.11    5.12
  -2   8   9   -4.94    8.51
   2  -8  -9    6.00    5.69
   2   8  -8    4.95    7.78
   2   8  -8   12.84    3.68
   2   8  -8   15.65    5.31
  -2   8   8   14.62    5.73
   2  -8  -8   13.07   10.72
   2  -8  -8   12.56    5.81
   2   8  -7   12.98    3.58
   2   8  -7   15.60   12.02
  -2   8   7   22.20    5.36
   2   8  -7    8.50    5.65
   2  -8  -7   20.75    6.86
   2  -8  -7   11.95    5.74
   2   8  -6   20.72    3.74
   2   8  -6   19.89   12.15
  -2   8   6   32.93    8.26
   2   8  -6   26.02    5.60
   2  -8  -6   19.80    6.28
   2  -8  -6   27.54    5.66
   2   8  -5   20.67    5.35
   2   8  -5    4.91    7.69
  -2   8   5   16.04    5.11
   2  -8  -5   10.00    5.62
   2  -8  -5   17.73    5.54
   2   8  -4  213.80   13.12
  -2   8   4  215.39    9.59
   2   8  -4  225.42   10.00
   2  -8  -4  212.68   14.04
   2  -8  -4  228.71   13.36
   2   8  -3   41.30    8.21
  -2   8   3   44.51    8.59
   2   8  -3   40.44    4.05
   2  -8  -3   35.57    4.93
  -2  -8   3   44.75    6.84
   2  -8  -3   36.96    6.19
   2   8  -2  145.47   10.93
  -2   8   2  143.04    7.45
   2   8  -2  136.46    5.82
   2  -8  -2  130.33    8.44
  -2  -8   2  123.27    9.45
   2  -8  -2  126.49    8.31
   2   8  -1   10.69    7.48
   2   8  -1   10.03    3.46
  -2   8   1    1.63    4.81
   2  -8  -1   16.89    5.15
  -2  -8   1   13.61    6.49
  -2  -8   1   12.13    3.94
   2   8   0  115.53    7.67
  -2   8   0  120.32    9.87
  -2  -8   0  103.47    9.41
  -2  -8   0  105.74    6.11
   2   8   1    3.30    3.62
  -2   8  -1    0.76    4.83
  -2  -8  -1    9.17    6.84
  -2  -8  -1    4.84    3.92
   2   8   2   17.07    4.20
  -2   8  -2   29.51    5.04
  -2  -8  -2   16.99    7.74
  -2  -8  -2   24.61    4.39
   2   8   3   16.53    6.28
  -2   8  -3   20.03    3.84
  -2   8  -3   10.10    7.98
  -2  -8  -3   20.38    8.43
  -2  -8  -3   11.78    4.51
   2   8   4  479.46   16.42
  -2   8  -4  509.04   18.62
  -2   8  -4  459.43   17.59
  -2  -8  -4  519.97   25.91
  -2  -8  -4  470.85   20.60
   2   8   5    7.46    4.65
  -2   8  -5    6.30    6.16
  -2   8  -5   21.49    7.90
  -2   8  -5    8.71    5.71
  -2  -8  -5    5.83    4.68
  -2  -8  -5   23.78   13.54
   2   8   6  441.34   19.68
  -2   8  -6  428.01   14.49
  -2   8  -6  420.88   16.70
  -2   8  -6  422.71   21.59
  -2  -8  -6  409.72   24.88
  -2  -8  -6  424.57   19.71
   2   8   7    5.61    4.86
  -2   8  -7   10.75    4.59
  -2   8  -7    7.71    5.79
  -2   8  -7   19.48    7.71
  -2  -8  -7    6.89   14.61
  -2  -8  -7   10.94    5.08
   2   8   8  225.17   14.47
  -2   8  -8  227.71   13.35
  -2   8  -8  256.02   16.01
  -2   8  -8  212.17   19.49
  -2  -8  -8  225.84   18.34
  -2  -8  -8  226.91   14.31
   2   8   9   24.80    6.10
  -2   8  -9   21.80    8.46
  -2   8  -9   31.60    5.72
  -2   8  -9   31.88    6.57
  -2  -8  -9   41.52   18.19
   2   8  10  208.35   15.08
  -2   8 -10  225.83   10.86
  -2   8 -10  209.94   11.50
  -2   8 -10  205.73   14.01
  -2  -8 -10  213.29   19.55
  -2  -8 -10  202.92   10.91
   2   8  11   10.10    6.50
  -2   8 -11   43.50   12.53
  -2   8 -11   17.31    6.14
  -2  -8 -11   10.73    9.64
  -2  -8 -11   28.29   19.99
   2   8  12   35.02   10.46
  -2   8 -12   22.94    8.43
  -2   8 -12   23.53   10.08
  -2  -8 -12   15.94    6.90
  -2  -8 -12   11.30   13.92
   2   8  13    5.10    6.94
  -2   8 -13   -2.14    8.01
  -2   8 -13    4.54    6.65
  -2  -8 -13   -1.85    6.77
  -2  -8 -13    0.71   13.38
   2   8  14   22.62    8.13
  -2   8 -14   28.03    9.25
  -2  -8 -14   35.88   15.69
  -2  -8 -14   25.20    7.68
   2   8  15   12.79   12.48
  -2   8 -15    0.06    8.53
  -2  -8 -15   15.94   11.57
   2   8  16   99.70   11.93
  -2   8 -16  106.00   17.11
  -2  -8 -16   90.49   15.86
   2   8  17    5.63    9.23
  -2   8 -17   32.61    9.23
  -2  -8 -17   -6.15    8.37
   2   8  18  163.41   16.06
  -2   8 -18  165.64   21.22
  -2  -8 -18  179.09   14.32
   2   8  19    7.44   10.46
  -2   8 -19    4.57    9.45
  -2  -8 -19   -0.24    9.39
   2   8  20   55.51   17.66
  -2   8 -20   38.12   16.75
  -2  -8 -20   39.78   10.59
   2   8  21    0.16   11.75
  -2   8 -21   -7.01   10.34
  -2  -8 -21   -4.55   10.32
   2   9 -22   15.65   13.64
  -2   9  22   10.25   18.34
   2  -9 -22    6.11   17.98
   2   9 -21   30.67   15.26
   2   9 -21   28.38    8.87
  -2   9  21   29.09   12.06
   2  -9 -21   14.68   18.22
   2   9 -20   16.40   13.84
   2   9 -20    6.95   12.30
  -2   9  20    9.46   10.81
   2  -9 -20   11.08   10.65
   2   9 -19   -2.03   12.36
   2   9 -19    2.63    7.57
  -2   9  19    8.77   10.00
   2  -9 -19   -8.85   10.04
   2   9 -18   19.37   19.72
   2   9 -18   37.66   12.06
  -2   9  18   25.50   10.22
   2  -9 -18   22.61   10.38
   2   9 -17   16.92   12.03
   2   9 -17    0.62    6.63
   2   9 -17    7.87    6.96
  -2   9  17   22.44   13.94
   2  -9 -17    7.93    9.39
   2   9 -16    2.72   11.18
   2   9 -16   -6.27    6.22
   2   9 -16   12.21    6.86
  -2   9  16    7.79    8.57
   2  -9 -16   -1.19    8.79
   2   9 -15  155.86   23.48
   2   9 -15  187.54   14.63
   2   9 -15  165.63   15.90
  -2   9  15  167.82   18.76
   2  -9 -15  133.13   19.22
   2   9 -14   -0.57   10.50
   2   9 -14    7.74    5.83
   2   9 -14   16.92    6.57
  -2   9  14   17.41    8.04
   2  -9 -14   16.10    8.58
   2   9 -13  116.01   13.90
   2   9 -13  123.40   11.57
   2   9 -13  137.52    9.59
  -2   9  13  134.21   16.04
   2  -9 -13  116.41   11.40
   2   9 -12   35.63   10.61
   2   9 -12   36.02    5.60
   2   9 -12   41.39    7.04
  -2   9  12   45.55    8.29
   2  -9 -12   39.81    8.50
   2   9 -11  137.99   13.79
   2   9 -11  124.77   10.68
   2   9 -11  125.31   13.31
  -2   9  11  120.86   15.10
   2  -9 -11  137.48   14.42
   2  -9 -11  134.77   10.41
   2   9 -10   73.05   11.11
   2   9 -10   56.16    5.54
   2   9 -10   72.81   10.85
  -2   9  10   58.21    8.09
   2  -9 -10   67.58   16.42
   2  -9 -10   59.24    8.51
   2   9  -9   20.11   13.20
   2   9  -9    8.91    6.59
   2   9  -9   -0.36    6.18
  -2   9   9    8.30    9.68
   2  -9  -9    5.93    8.44
   2  -9  -9    8.11   10.56
   2   9  -8    5.53    4.24
   2   9  -8    5.47    8.74
  -2   9   8    6.68    5.87
   2   9  -8   19.74    5.97
   2  -9  -8   20.13    7.92
   2  -9  -8   11.70    6.64
   2   9  -7  104.82    6.06
   2   9  -7   99.29   11.73
  -2   9   7  102.99    8.43
   2   9  -7   94.84    8.68
   2  -9  -7  102.44   14.01
   2  -9  -7  106.19    8.32
   2   9  -6   29.63   13.54
   2   9  -6    2.14    6.32
  -2   9   6    8.60    5.93
   2   9  -6   11.88    6.17
   2  -9  -6    6.46    9.83
   2  -9  -6    4.88    6.06
   2   9  -5   72.42   10.89
  -2   9   5  102.84    7.60
   2   9  -5   96.74    5.63
   2  -9  -5   84.17    8.19
   2  -9  -5   91.18   11.81
   2   9  -4    8.10    8.17
  -2   9   4    4.66    8.38
   2   9  -4    0.43    4.08
   2  -9  -4   -1.11    6.19
   2  -9  -4    6.15    5.33
   2   9  -3   57.12   10.02
  -2   9   3   59.21    6.61
   2   9  -3   58.02    5.15
   2  -9  -3   57.18    5.95
  -2  -9   3   60.12    7.87
   2  -9  -3   64.05   10.97
  -2   9   2   41.69    6.48
   2   9  -2   42.95    7.20
   2  -9  -2   41.24    7.11
  -2  -9   2   36.16    7.98
   2  -9  -2   40.57    6.94
   2   9  -1  196.58    8.14
  -2   9   1  193.36   10.06
   2  -9  -1  203.91   10.48
  -2  -9   1  190.10   12.67
  -2  -9   1  189.27    8.77
   2   9   0   -0.15    4.15
  -2   9   0    3.38    5.47
  -2  -9   0    9.30    7.15
   2   9   1   64.98    7.95
  -2   9  -1   60.06    9.98
  -2  -9  -1   60.20   14.32
  -2  -9  -1   67.05    8.82
   2   9   2   92.25    6.07
  -2   9  -2   96.01    7.54
  -2  -9  -2   87.21   10.59
  -2  -9  -2   88.23    6.42
   2   9   3   53.04    8.08
  -2   9  -3   32.24    6.53
  -2  -9  -3   46.85   10.13
  -2  -9  -3   50.25    5.79
   2   9   4   48.14    5.60
  -2   9  -4   47.54    5.00
  -2   9  -4   45.31    6.68
  -2  -9  -4   40.02   10.12
  -2  -9  -4   52.13    8.85
   2   9   5  199.33    9.67
  -2   9  -5  184.24   12.02
  -2   9  -5  199.00   14.84
  -2   9  -5  208.08   10.60
  -2  -9  -5  193.01    9.72
  -2  -9  -5  192.14   23.25
   2   9   6   16.54    5.44
  -2   9  -6   21.11    7.63
  -2   9  -6   12.31    9.09
  -2   9  -6   -1.73    9.63
  -2  -9  -6    7.98    8.69
  -2  -9  -6   20.25   10.37
   2   9   7  466.69   18.76
  -2   9  -7  450.73   17.57
  -2   9  -7  438.81   19.85
  -2   9  -7  508.46   33.38
  -2  -9  -7  463.03   29.30
  -2  -9  -7  464.24   19.18
   2   9   8    4.80    5.66
  -2   9  -8    3.40    5.43
  -2   9  -8  -13.06    9.71
  -2   9  -8    3.04    8.87
  -2  -9  -8  -10.50   11.07
  -2  -9  -8  -13.64    8.96
   2   9   9  125.90    9.19
  -2   9  -9  118.68    8.78
  -2   9  -9  143.42   10.02
  -2   9  -9  126.28   12.49
  -2  -9  -9  110.51   16.66
  -2  -9  -9  129.70    9.36
   2   9  10   33.96    6.97
  -2   9 -10   18.94    6.49
  -2   9 -10   18.18    7.48
  -2   9 -10   40.51   13.35
  -2  -9 -10   16.77   13.49
  -2  -9 -10   30.90    7.28
   2   9  11    6.69    6.83
  -2   9 -11    2.77    6.74
  -2   9 -11   26.90   10.88
  -2   9 -11   12.74    8.76
  -2  -9 -11   17.90   20.45
  -2  -9 -11    9.28   10.16
   2   9  12   26.82    7.80
  -2   9 -12   39.01   11.76
  -2   9 -12   29.49    8.03
  -2   9 -12   35.41    9.35
  -2  -9 -12   30.35   14.81
  -2  -9 -12   27.86    7.76
   2   9  13    5.23   11.53
  -2   9 -13    0.75    7.43
  -2   9 -13    7.14    7.55
  -2   9 -13    2.00   13.90
  -2  -9 -13   16.85   14.53
  -2  -9 -13   -6.11    7.37
   2   9  14   23.34    8.66
  -2   9 -14   26.37    9.85
  -2   9 -14   23.26   12.75
  -2  -9 -14   21.69    8.39
  -2  -9 -14   22.12   16.94
   2   9  15   45.15    9.71
  -2   9 -15   38.02   16.19
  -2   9 -15   40.51    9.76
  -2  -9 -15   56.26   14.15
  -2  -9 -15   39.16   28.10
   2   9  16   16.52    9.27
  -2   9 -16    6.19    9.52
  -2   9 -16   10.94   14.35
  -2  -9 -16   -6.79   13.18
  -2  -9 -16   -2.11   17.45
   2   9  17   59.28   12.02
  -2   9 -17   76.16   11.76
  -2  -9 -17   77.83   21.70
  -2  -9 -17   54.78   11.19
   2   9  18    9.78   15.69
  -2   9 -18   -0.62   10.33
  -2  -9 -18   -2.76   19.52
  -2  -9 -18   20.81    9.50
   2   9  19   47.77   12.69
  -2   9 -19   48.92   12.09
  -2  -9 -19   52.12   22.98
  -2  -9 -19   61.31   11.94
   2   9  20   15.01   11.71
  -2   9 -20   10.60   11.38
  -2  -9 -20   16.73   21.82
  -2  -9 -20    9.56   10.58
   2  10 -20   16.86   14.99
   2  10 -20    7.11    8.63
  -2  10  20   21.97   17.75
   2 -10 -20   23.61   17.12
   2  10 -19   16.82   21.50
   2  10 -19   18.44   12.52
   2  10 -19   13.89   12.84
  -2  10  19   19.62   10.93
   2 -10 -19   14.25   17.24
   2  10 -18    0.43   13.04
   2  10 -18    3.93    7.36
   2  10 -18   -7.15    7.74
  -2  10  18    3.48    9.88
   2 -10 -18   -3.48   10.55
   2  10 -17   18.17   13.21
   2  10 -17   24.91    7.57
   2  10 -17   32.97   12.70
  -2  10  17   20.73   10.29
   2 -10 -17    4.26   10.95
   2  10 -16   18.55   12.59
   2  10 -16   14.36   10.71
   2  10 -16   21.41    7.75
  -2  10  16   14.87    9.81
   2 -10 -16   22.96   10.38
   2  10 -15   12.77   18.09
   2  10 -15   -3.02    6.04
   2  10 -15    2.03    7.31
  -2  10  15   25.26   13.65
   2 -10 -15   -4.18   13.91
   2 -10 -15   16.56    9.17
   2  10 -14   86.93   14.66
   2  10 -14   86.75    7.90
   2  10 -14   75.58   14.41
  -2  10  14  104.29   11.21
   2 -10 -14   98.41   16.89
   2 -10 -14   72.27   17.42
   2  10 -13   29.23   17.10
   2  10 -13   20.07    8.70
   2  10 -13    8.57    7.43
  -2  10  13    7.66   12.75
   2 -10 -13   18.82   19.05
   2 -10 -13   12.78    8.78
   2  10 -12   97.83   13.89
   2  10 -12   83.98    7.44
   2  10 -12  107.52    9.46
  -2  10  12   94.79   10.57
   2 -10 -12   91.60   14.62
   2 -10 -12   95.17   11.07
   2  10 -11   42.88   16.79
   2  10 -11   31.86    8.61
   2  10 -11   22.22    7.62
  -2  10  11   21.63   12.01
   2 -10 -11   19.96   17.45
   2 -10 -11   36.78   13.24
   2  10 -10   12.25    5.17
   2  10 -10   -2.76   10.34
  -2  10  10    6.92    7.71
   2  10 -10   16.07   11.12
   2 -10 -10   10.70   10.35
   2 -10 -10   17.28    7.99
   2  10  -9  171.59   12.55
   2  10  -9  159.43   23.63
  -2  10   9  194.96   17.34
   2  10  -9  189.50   16.69
   2 -10  -9  197.48   22.99
   2 -10  -9  198.48   13.22
   2  10  -8    2.09    5.05
   2  10  -8    5.66   10.14
  -2  10   8    5.54    7.13
   2  10  -8   14.30    7.05
   2 -10  -8    4.49    8.96
   2 -10  -8   20.98   11.80
   2  10  -7   78.98   12.09
   2  10  -7   94.90    9.33
  -2  10   7   94.38   12.80
   2  10  -7   87.46    6.36
   2 -10  -7   86.61   10.20
   2 -10  -7   75.34    9.75
   2  10  -6   48.86   15.09
   2  10  -6   12.22    7.51
  -2  10   6   13.95    6.78
   2  10  -6   15.50    7.40
   2 -10  -6   10.52    7.35
   2 -10  -6   12.00   11.27
   2  10  -5    5.35    9.38
  -2  10   5   17.22    9.52
   2  10  -5    0.93    4.57
   2 -10  -5    4.36    7.38
   2 -10  -5    2.31    6.56
   2  10  -4  174.09   14.50
  -2  10   4  143.95   10.05
   2  10  -4  153.62   10.95
   2 -10  -4  171.67   16.34
   2 -10  -4  147.11    9.23
  -2  10   3    8.08    6.41
   2  10  -3    6.30    4.77
   2 -10  -3    4.81    7.40
   2 -10  -3   13.36    8.13
  -2  10   2  141.48    9.57
   2  10  -2  132.06    7.48
  -2 -10   2  134.71   11.14
   2 -10  -2  123.10   10.69
  -2  10   1   87.53    8.26
   2  10  -1   98.25    9.62
  -2 -10   1   92.31   10.44
   2 -10  -1   84.29    5.88
   2  10   0   44.97    5.85
  -2  10   0   60.73    7.32
  -2 -10   0   38.22    9.46
  -2 -10   0   57.78    6.69
   2  10   1   94.31    9.94
  -2  10  -1  106.90    8.36
  -2 -10  -1   91.22   11.00
  -2 -10  -1   67.29    7.54
   2  10   2   10.26    5.18
  -2  10  -2   19.81    9.69
  -2 -10  -2   17.57   14.06
  -2 -10  -2   16.69    9.11
   2  10   3   65.52    6.73
  -2  10  -3   77.08    8.00
  -2 -10  -3   73.26   11.17
  -2 -10  -3   71.43    7.45
   2  10   4   52.34    6.65
  -2  10  -4   54.67   11.72
  -2 -10  -4   67.86   11.99
  -2 -10  -4   59.49   10.34
   2  10   5  172.25   10.15
  -2  10  -5  183.34   16.00
  -2  10  -5  174.92   11.20
  -2 -10  -5  165.88   10.24
  -2 -10  -5  178.70   24.08
   2  10   6   67.89    7.53
  -2  10  -6   72.72    6.85
  -2  10  -6   71.65   11.81
  -2  10  -6   65.75   12.21
  -2 -10  -6   58.97    7.68
  -2 -10  -6   67.16   13.21
   2  10   7   52.84    7.30
  -2  10  -7   55.99    6.95
  -2  10  -7   40.08   16.93
  -2  10  -7   51.69    7.74
  -2 -10  -7   34.12    7.47
  -2 -10  -7   35.03   13.08
   2  10   8   40.71    7.19
  -2  10  -8   34.01    6.88
  -2  10  -8   29.66   10.66
  -2  10  -8   37.30   11.43
  -2 -10  -8   54.03   11.26
  -2 -10  -8   42.39   13.21
   2  10   9    7.62    6.82
  -2  10  -9    5.46    6.49
  -2  10  -9   13.21    7.01
  -2  10  -9   19.37    9.55
  -2 -10  -9    8.45   13.13
  -2 -10  -9    6.19    6.91
   2  10  10   25.56    7.25
  -2  10 -10   15.78    7.09
  -2  10 -10   21.70    7.39
  -2  10 -10    0.00   15.07
  -2 -10 -10   -2.91   13.90
  -2 -10 -10   12.19    7.49
   2  10  11   17.92   11.61
  -2  10 -11   15.66    7.77
  -2  10 -11   13.64   12.21
  -2  10 -11   18.42    9.70
  -2 -10 -11   27.22   22.20
  -2 -10 -11   16.11   11.68
   2  10  12   11.66    7.93
  -2  10 -12    4.25   11.88
  -2  10 -12    2.89    7.98
  -2  10 -12   31.66   14.62
  -2 -10 -12   11.35   15.21
  -2 -10 -12    0.24    8.01
   2  10  13   48.66   13.72
  -2  10 -13   35.77    9.43
  -2  10 -13   42.75    9.31
  -2  10 -13   68.63   11.37
  -2 -10 -13   51.67   17.77
  -2 -10 -13   22.99    9.32
   2  10  14   28.29    9.76
  -2  10 -14   32.46    9.49
  -2  10 -14   36.02   13.70
  -2  10 -14   38.83   10.96
  -2 -10 -14   24.60   27.63
  -2 -10 -14   36.82    9.44
   2  10  15   15.35    9.73
  -2  10 -15   22.61   10.00
  -2  10 -15   27.80    9.68
  -2  10 -15   51.02   17.13
  -2 -10 -15   21.86   19.11
  -2 -10 -15   43.72   14.43
   2  10  16   23.65   15.99
  -2  10 -16   24.82   16.10
  -2  10 -16   29.92    9.80
  -2  10 -16   18.43   11.15
  -2 -10 -16   60.36   19.56
  -2 -10 -16   26.76   10.24
   2  10  17   10.39   10.59
  -2  10 -17    6.57   10.82
  -2  10 -17    5.69    9.57
  -2  10 -17    8.95   16.45
  -2 -10 -17  -11.74   19.08
  -2 -10 -17    1.17    9.95
   2  10  18   42.94   13.35
  -2  10 -18   55.25   12.63
  -2 -10 -18   46.46   22.99
  -2 -10 -18   61.20   11.91
   2  11 -18   48.70   10.13
   2  11 -18   37.56    8.88
  -2  11  18   61.29   12.55
   2 -11 -18   29.36   19.32
   2 -11 -18   48.30   19.70
   2  11 -17    4.36   14.46
   2  11 -17   14.89    7.63
   2  11 -17    7.69    8.91
  -2  11  17   19.40   10.86
   2 -11 -17   23.22   25.98
   2 -11 -17   19.88   17.05
   2  11 -16   19.30   22.13
   2  11 -16   30.84   11.15
   2  11 -16   28.41   13.66
  -2  11  16   26.63   11.21
   2 -11 -16   19.37   16.93
   2 -11 -16   24.06   11.14
   2  11 -15   19.76   14.27
   2  11 -15   29.17    7.20
   2  11 -15   23.06    8.69
  -2  11  15   26.31   15.72
   2 -11 -15   25.71   16.12
   2 -11 -15   17.68   10.72
   2  11 -14    6.80   12.90
   2  11 -14   11.49    9.97
   2  11 -14   10.27    8.28
  -2  11  14   13.03    9.21
   2 -11 -14    7.60   21.73
   2 -11 -14   -3.70    9.71
   2  11 -13   16.74    6.43
   2  11 -13   19.17   13.00
  -2  11  13    5.95   14.45
   2  11 -13   18.71   12.74
   2 -11 -13    6.11   13.40
   2 -11 -13   17.39   14.66
   2  11 -12   16.02    6.36
   2  11 -12   11.59   12.23
  -2  11  12   14.74    9.13
   2  11 -12   23.62    8.22
   2 -11 -12   -4.09   12.65
   2 -11 -12   11.52    9.45
   2  11 -11   10.46    9.04
   2  11 -11    9.20   18.62
  -2  11  11   23.15   13.08
   2  11 -11    4.36    8.07
   2 -11 -11   23.17   17.86
   2 -11 -11    2.38    9.04
   2  11 -10  103.61    8.03
   2  11 -10   90.28   14.51
  -2  11  10  115.04   10.92
   2  11 -10   87.78   16.17
   2 -11 -10  114.07   14.48
   2 -11 -10   93.25   17.15
   2  11  -9   -2.25   11.19
   2  11  -9   -5.35   12.19
  -2  11   9    5.98    7.97
   2  11  -9    3.95    8.41
   2 -11  -9   -3.80    9.68
   2 -11  -9   13.39    8.66
   2  11  -8   77.03   19.71
   2  11  -8   69.43    9.52
  -2  11   8   65.24    9.21
   2  11  -8   54.62    6.66
   2 -11  -8   86.50   16.47
   2 -11  -8   51.22   10.05
   2  11  -7   12.04   10.60
   2  11  -7    8.87    8.20
  -2  11   7    3.18    7.26
   2  11  -7   -3.42    8.26
   2 -11  -7   -5.98   13.29
   2 -11  -7   24.08   13.09
   2  11  -6  113.82   21.31
   2  11  -6  111.47   11.62
  -2  11   6   99.35   10.44
   2  11  -6  102.80    7.60
   2 -11  -6   86.39   10.65
   2 -11  -6   99.98   11.45
  -2  11   5   26.60    8.20
   2  11  -5   23.56    5.70
   2 -11  -5    7.63   13.19
   2 -11  -5   19.69    7.47
   2  11  -4   30.62   11.33
  -2  11   4   24.10    8.01
   2  11  -4   29.72    5.95
   2 -11  -4   30.86    8.76
   2 -11  -4   26.92   10.63
   2  11  -3   56.50    6.52
  -2  11   3   51.01    8.50
   2 -11  -3   64.26   10.29
  -2  11   2   54.13    7.93
   2  11  -2   50.70    6.41
  -2 -11   2   36.88    9.65
   2 -11  -2   41.19    6.11
   2  11  -1   47.97    6.54
  -2  11   1   40.79    8.21
  -2 -11   1   24.08   15.89
   2  11   0  105.72   11.06
  -2  11   0   91.94    9.40
  -2 -11   0   76.94   12.04
   2  11   1   18.46    5.90
  -2  11  -1    9.86    7.19
  -2 -11  -1   20.41    9.72
  -2 -11  -1   16.94    6.80
   2  11   2  145.07   12.91
  -2  11  -2  131.54   10.50
  -2 -11  -2  134.82   14.24
  -2 -11  -2  120.52   14.37
   2  11   3   18.63    6.02
  -2  11  -3    5.23    7.62
  -2 -11  -3   14.34   16.28
  -2 -11  -3   13.99    7.10
   2  11   4  106.43   12.74
  -2  11  -4  109.81    9.89
  -2 -11  -4  100.92   14.23
  -2 -11  -4   91.83    9.10
   2  11   5    7.62    6.40
  -2  11  -5    5.02   11.00
  -2  11  -5    0.90    7.25
  -2 -11  -5   11.98    6.75
  -2 -11  -5   -0.85   11.28
   2  11   6    6.20    6.60
  -2  11  -6    4.10   10.57
  -2  11  -6    5.83    6.97
  -2 -11  -6   -6.53    6.90
  -2 -11  -6   -4.23   17.61
   2  11   7    6.29    6.82
  -2  11  -7    4.24    6.16
  -2  11  -7   19.62   16.75
  -2  11  -7    1.46    7.28
  -2 -11  -7   17.27    7.23
  -2 -11  -7    2.23   12.32
   2  11   8   10.56    7.01
  -2  11  -8    0.84    6.57
  -2  11  -8    5.33   10.55
  -2  11  -8   -9.98   11.36
  -2 -11  -8   11.81    7.37
  -2 -11  -8   19.41   19.87
   2  11   9   11.76    7.94
  -2  11  -9   10.36    7.07
  -2  11  -9    6.66   10.69
  -2  11  -9   14.47    7.51
  -2 -11  -9   23.09    8.17
  -2 -11  -9   23.70   13.83
   2  11  10   20.57    7.94
  -2  11 -10   15.85    7.64
  -2  11 -10   10.02   11.03
  -2  11 -10   15.44    7.83
  -2 -11 -10   16.12   12.73
  -2 -11 -10    6.41   14.43
   2  11  11   -9.22   11.94
  -2  11 -11   -4.84    7.60
  -2  11 -11   14.76   12.32
  -2  11 -11    6.82   10.46
  -2 -11 -11    8.45   23.03
  -2 -11 -11   -4.23    8.28
   2  11  12   64.94   10.23
  -2  11 -12   52.81   14.12
  -2  11 -12   48.89    9.96
  -2  11 -12   57.00   18.20
  -2 -11 -12   34.18   18.34
  -2 -11 -12   60.72   10.37
   2  11  13   12.02    9.10
  -2  11 -13    2.10   10.45
  -2  11 -13   -7.38    8.66
  -2 -11 -13    7.10    8.95
  -2 -11 -13   -8.11   16.83
   2  11  14   34.49   10.56
  -2  11 -14   22.49   11.89
  -2  11 -14   34.73   14.79
  -2 -11 -14   57.34   15.50
  -2 -11 -14   46.53   30.11
   2  11  15    4.10   10.02
  -2  11 -15    0.68   11.07
  -2  11 -15   -3.89    9.41
  -2 -11 -15    5.47    9.94
  -2 -11 -15   23.12   18.64
   2  11  16   14.94   16.95
  -2  11 -16   11.46   11.71
  -2  11 -16   22.93   10.40
  -2 -11 -16   18.35   10.53
  -2 -11 -16   34.36   20.27
   2  12 -15   15.69    7.83
   2  12 -15   22.60   14.96
  -2  12  15    2.67   16.77
   2  12 -15   21.06    9.47
   2 -12 -15   31.48   16.78
   2 -12 -15   41.15   11.84
   2  12 -14    6.94   10.93
   2  12 -14   24.36   22.14
  -2  12  14    0.50   10.27
   2  12 -14    3.88    8.94
   2 -12 -14    9.64   22.08
   2 -12 -14    6.52   10.54
   2  12 -13    2.79    6.93
   2  12 -13   14.67   13.86
  -2  12  13    4.76    9.81
   2  12 -13   -0.24   14.22
   2 -12 -13   16.11   14.45
   2 -12 -13    3.37   10.46
   2  12 -12    2.22    6.63
   2  12 -12    5.10   20.22
  -2  12  12   11.33    9.82
   2  12 -12    1.49    8.69
   2 -12 -12   17.71   20.18
   2 -12 -12   -2.46   16.01
   2  12 -11   20.89   13.78
   2  12 -11   17.97    9.29
  -2  12  11   26.21    9.50
   2  12 -11   26.42   10.69
   2 -12 -11   28.89   12.96
   2 -12 -11   20.68   10.74
   2  12 -10   -7.12   19.48
   2  12 -10   21.83   14.12
  -2  12  10    6.68    9.12
   2  12 -10    5.84    6.38
   2 -12 -10    6.02   17.27
   2 -12 -10   -4.81    9.96
   2  12  -9  127.74   17.59
   2  12  -9  142.29   19.03
  -2  12   9  130.62   13.01
   2  12  -9  120.48   13.78
   2 -12  -9  120.58   15.36
   2 -12  -9  136.22   20.17
   2  12  -8    6.32   19.63
   2  12  -8   21.90    9.12
  -2  12   8   -3.60   13.31
   2  12  -8   -0.96    6.46
   2 -12  -8    6.66    9.83
   2 -12  -8    5.89   10.17
   2  12  -7  106.32   16.26
   2  12  -7  102.56   12.63
  -2  12   7  111.03   11.50
   2  12  -7  121.97   12.70
   2 -12  -7   99.35   17.85
   2 -12  -7  110.29   13.03
   2  12  -6    2.03   14.24
  -2  12   6    1.92   12.51
   2  12  -6   -2.43    5.96
   2 -12  -6    5.34   12.08
   2 -12  -6   -0.30    9.36
   2  12  -5   26.90   12.12
   2  12  -5   27.20   10.15
  -2  12   5   12.86    8.51
   2  12  -5   25.71    9.89
   2 -12  -5   19.22   11.51
   2 -12  -5   15.11    9.39
   2  12  -4    4.37    6.07
  -2  12   4   10.49   12.30
   2 -12  -4    3.81    9.97
   2  12  -3    1.94    6.02
  -2  12   3    3.65    7.68
   2 -12  -3   11.13    9.33
   2  12  -2    5.70    6.14
  -2  12   2    2.76    7.69
   2  12  -1   28.46    6.91
  -2  12   1   45.22    8.55
  -2 -12   1   25.19   10.37
   2  12   0    6.54    6.30
  -2  12   0    9.57    7.67
  -2 -12   0   -5.93   15.44
   2  12   1  114.49    9.01
  -2  12  -1  109.32   10.53
  -2 -12  -1  122.43   20.24
   2  12   2   -1.06    6.55
  -2  12  -2    1.22    7.56
  -2 -12  -2   12.90   10.44
  -2 -12  -2    2.00    7.56
   2  12   3   71.00    8.35
  -2  12  -3   73.85   13.94
  -2 -12  -3   67.78   13.60
  -2 -12  -3   75.21   14.44
   2  12   4    2.89   10.57
  -2  12  -4   17.81   11.72
  -2  12  -4   -8.56    7.82
  -2 -12  -4   -6.16    7.74
  -2 -12  -4    5.84   11.20
   2  12   5   19.26    7.56
  -2  12  -5   39.03   19.76
  -2  12  -5   19.05   12.42
  -2 -12  -5   34.43   12.35
  -2 -12  -5   19.21   12.82
   2  12   6    9.50   11.42
  -2  12  -6    6.19   11.90
  -2  12  -6   13.65    8.25
  -2 -12  -6   21.31    8.27
  -2 -12  -6   25.37   19.21
   2  12   7   12.69    7.59
  -2  12  -7    9.06   17.92
  -2  12  -7   17.35    8.28
  -2 -12  -7   11.97   12.96
  -2 -12  -7   -0.07   13.48
   2  12   8   13.09    7.74
  -2  12  -8    4.20   11.70
  -2  12  -8   21.09   12.42
  -2 -12  -8   -3.04    8.59
  -2 -12  -8   11.69   21.76
   2  12   9    7.54    8.92
  -2  12  -9   14.25   11.82
  -2  12  -9   18.03    8.48
  -2 -12  -9   29.75    9.01
  -2 -12  -9   35.50   15.69
   2  12  10    1.56    8.77
  -2  12 -10   14.33   11.75
  -2  12 -10    3.15    8.56
  -2 -12 -10    2.93   13.61
  -2 -12 -10   16.49   23.77
   2  12  11   44.44   14.51
  -2  12 -11   17.59   11.85
  -2  12 -11   -1.88   13.84
  -2 -12 -11   14.92    9.58
  -2 -12 -11   32.05   17.21
   2  12  12   12.52    9.65
  -2  12 -12   -0.24   18.70
  -2  12 -12    8.64    8.99
  -2 -12 -12   12.31    9.55
  -2 -12 -12   16.85   17.00
   2  12  13   42.85   11.25
  -2  12 -13   44.88   13.55
  -2  12 -13   43.64   10.58
  -2 -12 -13   42.51   11.10
  -2 -12 -13   33.07   30.07
   2  13 -11   17.46   14.95
   2  13 -11   19.30   10.67
  -2  13  11   21.83   10.65
   2  13 -11   13.35   11.39
   2 -13 -11   13.73   13.35
   2 -13 -11   14.15   18.17
   2  13 -10   50.81   24.69
   2  13 -10   50.42   17.60
  -2  13  10   42.35   17.02
   2  13 -10   41.72    8.54
   2 -13 -10   29.45   13.17
   2 -13 -10   71.48   13.34
   2  13  -9   22.40   14.46
   2  13  -9   12.31   10.49
  -2  13   9   17.57   10.18
   2  13  -9   11.67   11.27
   2 -13  -9   16.85   17.29
   2 -13  -9   19.70   11.72
   2  13  -8   48.77   23.03
  -2  13   8   48.35   10.94
   2  13  -8   52.87    8.22
   2  13  -8   53.55   12.05
   2 -13  -8   70.15   19.64
   2  13  -7   20.04   13.48
  -2  13   7   23.46    8.94
   2  13  -7   -3.46    7.06
   2  13  -7   -0.36   16.40
   2 -13  -7    7.99   10.93
  -2  13   6   37.52   10.44
   2  13  -6   38.55   11.71
   2  13  -6   56.83   12.09
   2 -13  -6   45.70   12.12
   2  13  -5    7.66    6.93
   2  13  -5    7.57   11.17
  -2  13   5   17.06   13.78
   2  13  -4   19.76   11.01
  -2  13   4   25.02    9.31
   2  13  -3    7.50    7.01
  -2  13   3   28.05   13.48
   2  13  -2   -8.00    7.00
  -2  13   2    2.35    8.53
   2  13  -1    8.67    7.05
  -2  13   1   11.89    8.65
   2  13   0   16.49    7.54
  -2  13   0   23.68    8.70
  -2 -13   0   20.79   11.22
   2  13   1   -3.79   10.76
  -2  13  -1    2.89    8.47
  -2 -13  -1   -2.50   17.19
   2  13   2   45.85    8.40
  -2  13  -2   46.40   14.55
  -2 -13  -2   43.55   13.17
   2  13   3    6.20   11.38
  -2  13  -3    2.59    8.70
  -2 -13  -3    1.85   11.84
  -2 -13  -3    5.85    8.77
   2  13   4   34.43    8.92
  -2  13  -4   34.65   14.98
  -2  13  -4   37.37    9.69
  -2 -13  -4   44.03    9.93
  -2 -13  -4   34.52   20.55
   2  13   5    2.21    7.99
  -2  13  -5   11.40   12.75
  -2  13  -5    7.05    8.63
  -2 -13  -5   -1.48    9.05
  -2 -13  -5   26.04   13.06
   2  13   6    4.19    8.15
  -2  13  -6   11.32   13.33
  -2  13  -6   13.85    8.78
  -2 -13  -6   10.67    9.45
  -2 -13  -6    9.06   21.03
   2  13   7    3.52    8.75
  -2  13  -7   15.90   13.28
  -2  13  -7   14.07   13.62
  -2 -13  -7   22.33   14.20
  -2 -13  -7   27.56   14.62
   2  13   8   -1.46   13.19
  -2  13  -8    7.63   13.20
  -2  13  -8    4.64    8.98
  -2 -13  -8   12.29    9.68
  -2 -13  -8    0.73   23.33
   2  13   9   -8.56    9.02
  -2  13  -9   11.40   12.79
  -2  13  -9    5.56    9.15
  -2 -13  -9    2.94    9.94
  -2 -13  -9    9.82   16.06
   2  14  -2   41.19    8.84
  -2  14   2   40.63   10.75
   2  14  -1   11.40    8.06
  -2  14   1    6.16    9.61
   2  14   0    4.64   12.45
  -2  14   0    9.62    9.41
   2  14   1   19.84    8.62
  -2  14  -1   30.69   15.66
   3   0 -28   28.05    9.63
  -3   0  28   14.17   12.42
   3   0 -27    1.16    8.50
  -3   0  27   13.37   10.80
   3   0 -26   -0.24   12.13
  -3   0  26   -1.60   15.41
   3   0 -25    0.48   11.28
  -3   0  25   -5.35    8.92
   3   0 -24   83.64    9.54
  -3   0  24   97.36   11.52
   3   0 -23   -6.95    6.33
  -3   0  23   11.34    8.05
   3   0 -22   43.27    7.02
  -3   0  22   42.47   12.40
   3   0 -21   -2.98    5.49
  -3   0  21    3.42    6.45
   3   0 -20   54.73    6.52
  -3   0  20   58.99    7.61
   3   0 -19   -1.01    4.83
  -3   0  19   -3.64    8.74
   3   0 -18  167.79    8.05
  -3   0  18  171.31    9.25
   3   0 -17   -1.02    6.19
  -3   0  17   -0.12    4.77
   3   0 -16   35.24    6.52
  -3   0  16   42.82    7.49
   3   0 -15   -2.01    5.32
  -3   0  15    2.77    4.14
   3   0 -14   74.09    6.30
  -3   0  14   90.68    5.30
   3   0 -13    0.16    2.89
  -3   0  13    2.71    4.85
   3   0 -12  487.23   13.49
  -3   0  12  556.62   14.85
   3   0 -11    1.40    2.30
  -3   0  11    8.33    4.00
   3   0 -10  944.47   25.91
  -3   0  10  935.25   26.33
   3   0  -9    0.18    1.84
  -3   0   9    2.09    2.01
   3   0  -8 1306.75   39.02
  -3   0   8 1298.15   37.45
   3   0  -7    1.53    1.53
  -3   0   7    0.66    1.52
   3   0  -6    1.45    2.03
  -3   0   6    7.45    1.36
   3   0  -5    2.78    1.77
  -3   0   5    0.89    1.09
   3   0  -4  229.73    3.91
  -3   0   4  235.42    3.88
   3   0  -3   -2.60    2.57
   3   0  -3   -1.48    1.63
  -3   0   3    0.54    0.91
   3   0  -2 1242.34   37.97
  -3   0   2 1258.30   40.18
  -3   0   2 1233.59   29.69
   3   0  -1    2.53    4.29
  -3   0   1    5.09    2.60
  -3   0   1    0.30    1.66
   3   0   0 1232.50   42.13
   3   0   0 1164.78   34.77
  -3   0   0 1250.83   38.52
  -3   0   0 1257.97   33.74
   3   0   1    5.55    3.19
   3   0   1   -2.75    3.25
  -3   0  -1    0.81    4.80
  -3   0  -1    0.48    2.00
   3   0   2  227.37    5.94
  -3   0  -2  229.61   10.02
  -3   0  -2  234.41    7.24
   3   0   3   -1.43    2.60
  -3   0  -3    1.38    3.54
   3   0   4  467.72   14.32
  -3   0  -4  462.59   14.00
   3   0   5   -0.72    2.93
  -3   0  -5   -0.37    2.77
   3   0   6   32.87    3.79
  -3   0  -6   30.06    3.38
   3   0   7    1.54    5.28
  -3   0  -7   -3.55    3.23
   3   0   8   58.39    4.98
  -3   0  -8   65.05    4.48
   3   0   9    1.27    4.20
  -3   0  -9   -4.36    3.77
   3   0  10  603.58   21.34
  -3   0 -10  635.52   24.88
   3   0  11  -10.94    4.95
  -3   0 -11   -2.19    4.44
   3   0  12  952.51   38.80
  -3   0 -12 1021.94   37.58
   3   0  13   -2.22    5.83
  -3   0 -13    8.87    7.27
   3   0  14   40.53    7.25
  -3   0 -14   50.09    6.34
   3   0  15    2.66   10.27
  -3   0 -15    9.13    5.92
   3   0  16    7.07   11.73
  -3   0 -16    5.61    6.37
   3   0  17   -5.61    8.05
  -3   0 -17   -4.27    6.58
   3   0  18    6.36    8.64
  -3   0 -18   14.38    6.59
   3   0  19   -7.50    8.90
  -3   0 -19   12.02    7.19
   3   0  20   22.49   10.33
  -3   0 -20   22.23   12.34
   3   0  21    5.21   10.43
  -3   0 -21    2.68    8.30
   3   0  22   99.65   15.39
  -3   0 -22  127.47   12.16
   3   0  23  -12.78   18.62
  -3   0 -23   16.85    9.40
   3   0  24   37.91   14.23
  -3   0 -24   22.31   16.04
   3   0  25    9.58   13.75
  -3   0 -25    2.99   10.18
   3   0  26   28.43   14.80
  -3   0 -26   18.88   11.43
   3   1 -28  -11.83    9.07
  -3   1  28    5.57   11.80
   3  -1 -28  -14.70   13.99
  -3  -1  28    5.28   11.66
   3   1 -27   11.89    8.55
  -3   1  27   13.62   11.19
   3  -1 -27   14.94   13.43
  -3  -1  27   13.86   11.16
   3   1 -26   14.62    7.87
  -3   1  26   15.57   10.45
   3  -1 -26   10.36    8.18
  -3  -1  26    8.73   15.93
   3   1 -25   -0.21    7.38
  -3   1  25    9.18    9.36
   3  -1 -25   13.68    7.69
  -3  -1  25    0.75    9.44
   3   1 -24   64.89   12.02
  -3   1  24   46.44   10.00
   3  -1 -24   40.04    8.16
  -3  -1  24   38.79    9.80
   3   1 -23   41.69   10.67
  -3   1  23   33.85    9.26
   3  -1 -23   32.91    7.64
  -3  -1  23   33.83    8.92
   3   1 -22   19.55    6.19
  -3   1  22   25.15   11.73
   3  -1 -22   15.18    6.63
  -3  -1  22   29.11   11.89
   3   1 -21  122.94    8.15
  -3   1  21  118.18   10.11
   3  -1 -21  115.89    8.75
  -3  -1  21  112.19   14.22
   3   1 -20   33.64    5.56
  -3   1  20   20.29    7.11
   3  -1 -20   33.13    6.04
  -3  -1  20   29.59    6.88
   3   1 -19   79.23    6.21
  -3   1  19   69.10    7.68
   3  -1 -19   75.38    6.69
  -3  -1  19   73.09    7.67
   3   1 -18   72.85    8.11
  -3   1  18   94.50    7.30
   3  -1 -18   71.54    6.19
  -3  -1  18   69.41    6.87
   3   1 -17   82.18    7.76
  -3   1  17   74.62    9.47
   3  -1 -17   70.60    5.87
  -3  -1  17   77.26    8.99
   3   1 -16  111.67    7.78
  -3   1  16  105.51    6.57
   3  -1 -16  112.05    6.26
  -3  -1  16  112.83    6.57
   3   1 -15  184.08    6.74
  -3   1  15  178.53    7.74
   3  -1 -15  176.39    7.20
  -3  -1  15  195.33    7.79
   3   1 -14    1.79    3.00
  -3   1  14   -0.42    3.72
   3  -1 -14    3.90    3.45
  -3  -1  14    3.10    3.50
   3   1 -13  945.15   28.87
  -3   1  13  992.50   32.03
   3  -1 -13  962.78   30.53
  -3  -1  13  893.32   33.18
   3   1 -12   16.80    2.72
  -3   1  12   26.02    3.34
   3  -1 -12   17.56    3.31
  -3  -1  12   16.34    3.15
   3   1 -11  719.99   18.67
  -3   1  11  722.75   22.89
   3  -1 -11  760.73   22.71
  -3  -1  11  672.50   18.96
   3   1 -10    4.03    1.93
  -3   1  10   -3.66    2.52
   3  -1 -10    6.28    2.40
  -3  -1  10    0.93    3.54
   3   1  -9 1861.75   68.04
  -3   1   9 1974.75   73.68
   3  -1  -9 1910.93   74.76
  -3  -1   9 2008.34   71.94
   3   1  -8    4.05    1.42
  -3   1   8   -0.56    2.04
   3  -1  -8   -0.19    2.08
  -3  -1   8    2.57    1.69
   3   1  -7  365.29    7.34
  -3   1   7  367.35    9.43
   3  -1  -7  355.24    7.90
  -3  -1   7  358.99    7.64
   3   1  -6  110.86    2.66
  -3   1   6  102.80    3.04
   3  -1  -6  106.82    3.06
  -3  -1   6   99.01    2.80
   3   1  -5  142.11    2.56
  -3   1   5  154.60    3.58
   3  -1  -5  161.16    3.72
  -3  -1   5  139.67    2.62
   3   1  -4   85.14    4.84
   3   1  -4   93.76    1.51
   3  -1  -4   92.02    2.64
  -3  -1   4   86.27    1.42
   3   1  -3  534.65   15.11
  -3   1   3  512.78   10.46
   3  -1  -3  546.65   11.18
  -3  -1   3  529.99   14.37
   3   1  -2  180.35    6.34
  -3   1   2  167.94    3.76
   3  -1  -2  170.38    3.94
  -3  -1   2  164.51    6.09
   3  -1  -2  169.71    4.21
   3   1  -1 1289.74   44.48
  -3   1   1 1308.20   35.81
   3   1  -1 1298.92   31.37
  -3   1   1 1295.56   35.94
  -3  -1   1 1296.59   43.43
   3  -1  -1 1265.73   36.02
  -3  -1   1 1288.99   31.11
  -3   1   0 2348.64   95.60
   3   1   0 2323.18  103.90
   3   1   0 2284.39   82.85
  -3   1   0 2367.62   89.81
   3  -1   0 2364.35   91.08
  -3  -1   0 2297.65   81.79
  -3  -1   0 2292.68  102.09
   3   1   1 2998.77  168.22
   3   1   1 3044.13  133.37
  -3   1  -1 3174.32  150.07
  -3   1  -1 3044.83  146.11
  -3  -1  -1 3032.71  159.55
  -3  -1  -1 3006.36  129.54
   3   1   2  191.88    6.07
  -3   1  -2  199.48    6.08
  -3  -1  -2  198.40    8.04
  -3  -1  -2  192.70    4.46
   3  -1   2  212.05    6.55
   3   1   3  776.56   19.49
  -3   1  -3  756.00   20.87
  -3  -1  -3  775.80   26.16
  -3  -1  -3  766.07   18.73
   3  -1   3  764.87   22.03
   3   1   4   63.25    3.36
  -3   1  -4   59.96    3.85
   3  -1   4   67.06    4.17
  -3  -1  -4   67.28    4.47
   3   1   5  111.01    6.40
  -3   1  -5  105.92    4.81
   3  -1   5  125.65    7.53
  -3  -1  -5  117.15    4.21
   3   1   6  117.21    6.83
  -3   1  -6  111.78    7.24
   3  -1   6  108.67    5.71
  -3  -1  -6   98.61    4.46
   3   1   7  225.62    9.42
  -3   1  -7  215.33    7.88
   3  -1   7  204.16   10.94
  -3  -1  -7  212.15    6.83
   3   1   8   12.27    5.97
  -3   1  -8    8.47    3.95
   3  -1   8   14.53    4.44
  -3  -1  -8   13.78    5.29
   3   1   9  249.81   12.34
  -3   1  -9  249.32   12.43
   3  -1   9  257.98   10.30
  -3  -1  -9  262.97    8.84
   3   1  10   13.59    4.65
  -3   1 -10    7.77    4.24
   3  -1  10   18.88    5.10
  -3  -1 -10    7.88    3.92
   3   1  11  647.35   23.97
  -3   1 -11  665.52   28.18
   3  -1  11  670.65   25.58
  -3  -1 -11  671.78   22.39
   3   1  12    3.05    5.27
  -3   1 -12    6.64    4.99
   3  -1  12   -0.11    5.84
  -3  -1 -12   -3.89    6.49
   3   1  13   45.15    6.64
  -3   1 -13   52.30    6.23
   3  -1  13   35.94   10.51
  -3  -1 -13   47.37    5.70
   3   1  14  166.43   10.44
  -3   1 -14  174.48   13.12
   3  -1  14  150.34   15.71
  -3  -1 -14  185.74    9.26
   3   1  15  169.37   10.97
  -3   1 -15  172.68    9.99
   3  -1  15  166.06   16.58
  -3  -1 -15  178.80    9.76
   3   1  16  106.76   14.37
  -3   1 -16   96.73    8.86
   3  -1  16  104.94   10.80
  -3  -1 -16  119.76   12.22
   3   1  17    0.54   12.60
  -3   1 -17   10.36    6.82
   3  -1  17   17.90    8.75
  -3  -1 -17   24.06    6.39
   3   1  18   61.38   10.05
  -3   1 -18   49.81    8.12
   3  -1  18   41.13   10.41
  -3  -1 -18   53.12    7.93
   3   1  19   77.37   11.04
  -3   1 -19   68.01    9.22
   3  -1  19   61.69   11.72
  -3  -1 -19   64.48    9.05
   3   1  20   -1.06    9.57
  -3   1 -20   22.23   11.80
   3  -1  20    0.27    9.98
  -3  -1 -20    3.54    7.89
   3   1  21   87.33   13.19
  -3   1 -21   96.09   11.04
   3  -1  21   72.14   13.89
  -3  -1 -21  109.73   16.03
   3   1  22    8.27   16.37
  -3   1 -22    0.02    8.70
   3  -1  22   10.47   11.32
  -3  -1 -22    1.94    8.23
   3   1  23   71.41   14.61
  -3   1 -23   73.67   16.39
   3  -1  23   94.33   14.65
  -3  -1 -23   54.52   11.41
   3   1  24   -7.98   12.80
  -3   1 -24    9.96    9.55
   3  -1  24   -9.04   19.87
  -3  -1 -24   12.12    9.81
   3   1  25   20.67   13.89
  -3   1 -25   16.02   10.46
   3  -1  25   34.72   22.27
  -3  -1 -25   12.30   16.57
   3   1  26   26.82   14.44
  -3   1 -26   16.81   16.98
   3  -1  26   -6.21   15.07
  -3  -1 -26   29.97   11.49
   3   2 -28   35.67    9.82
  -3   2  28   31.65   19.86
   3  -2 -28   33.99   10.81
  -3  -2  28   46.98   13.40
   3   2 -27   24.30   13.18
  -3   2  27   21.03   11.83
   3  -2 -27   21.92    9.67
  -3  -2  27   31.96   11.90
   3   2 -26   14.91    7.52
  -3   2  26    8.28   10.65
   3  -2 -26   11.11    8.48
  -3  -2  26   -7.46   10.75
   3   2 -25   65.28    8.75
  -3   2  25   67.72   17.45
   3  -2 -25   66.25    9.67
  -3  -2  25   49.02   17.21
   3   2 -24   24.59    7.22
  -3   2  24   29.31    9.73
   3  -2 -24   31.58    8.16
  -3  -2  24   28.31    9.57
   3   2 -23  137.16   13.60
  -3   2  23  134.23   12.23
   3  -2 -23  139.05   10.54
  -3  -2  23  128.06   12.04
   3   2 -22  111.46   12.80
  -3   2  22  125.74   16.29
   3  -2 -22  128.75    9.79
  -3  -2  22  113.24   10.95
   3   2 -21   48.49    6.38
  -3   2  21   60.05    8.59
   3  -2 -21   43.43    7.22
  -3  -2  21   52.11    8.29
   3   2 -20  112.37    7.44
  -3   2  20  129.62    9.88
   3  -2 -20  110.71   12.21
  -3  -2  20  145.48   14.10
   3   2 -19   -0.03    4.76
  -3   2  19   12.96    6.01
   3  -2 -19    6.05    8.39
  -3  -2  19   14.26    8.81
   3   2 -18  186.09   10.70
  -3   2  18  173.61    9.49
   3  -2 -18  146.73    8.44
  -3  -2  18  152.92    9.13
   3   2 -17   15.45    6.08
  -3   2  17    5.40    8.09
   3  -2 -17    1.48    4.93
  -3  -2  17    9.40    5.00
   3   2 -16   28.29    4.06
  -3   2  16   27.92    5.24
   3  -2 -16   33.50    4.83
  -3  -2  16   30.69    5.06
   3   2 -15   67.67    4.38
  -3   2  15   71.83    7.85
   3  -2 -15   67.01    5.33
  -3  -2  15   64.27    5.29
   3   2 -14    6.92    3.02
  -3   2  14    4.84    4.02
   3  -2 -14   10.68    3.78
  -3  -2  14    6.04    3.67
   3   2 -13  516.77   16.56
  -3   2  13  520.70   16.66
   3  -2 -13  564.30   16.92
  -3  -2  13  534.99   16.00
   3   2 -12  198.28    7.23
  -3   2  12  193.93    7.16
   3  -2 -12  194.36    8.84
  -3  -2  12  181.04    6.37
   3   2 -11   37.71    2.63
  -3   2  11   43.82    3.52
   3  -2 -11   40.68    3.64
  -3  -2  11   35.14    3.01
   3   2 -10  968.29   26.06
  -3   2  10  960.59   29.08
   3  -2 -10  990.84   32.98
  -3  -2  10  971.69   27.54
   3   2  -9   -0.03    1.60
  -3   2   9   -1.44    2.68
   3  -2  -9    1.57    2.61
  -3  -2   9   -2.92    2.03
   3   2  -8 1541.39   46.88
  -3   2   8 1572.19   52.59
   3  -2  -8 1521.79   52.19
  -3  -2   8 1492.53   48.32
   3   2  -7  773.76   16.88
  -3   2   7  739.15   19.79
   3  -2  -7  792.69   22.94
  -3  -2   7  779.49   17.26
   3   2  -6   -0.09    1.28
  -3   2   6   -2.63    2.13
   3  -2  -6    2.34    3.40
  -3  -2   6    1.60    1.56
   3   2  -5  172.84    7.07
   3   2  -5  164.25    2.51
  -3   2   5  162.10    4.49
   3  -2  -5  171.04    4.63
   3   2  -4    5.90    3.87
   3   2  -4    0.87    0.38
  -3   2   4    0.62    3.03
   3  -2  -4   -0.23    2.04
   3   2  -3   88.16    5.23
  -3   2   3   85.74    3.09
   3  -2  -3   80.83    3.26
  -3  -2   3   87.95    5.27
   3   2  -2  793.43   25.56
  -3   2   2  764.90   18.68
   3  -2  -2  762.65   21.51
  -3  -2   2  802.83   28.56
   3   2  -1   36.54    4.81
  -3   2   1   34.12    2.62
   3   2  -1   29.38    1.35
  -3  -2   1   33.39    4.54
   3  -2  -1   27.60    1.68
  -3  -2   1   30.29    1.25
   3   2   0    2.52    6.84
   3   2   0    1.40    1.71
  -3   2   0    2.04    1.34
  -3  -2   0    4.54    4.31
  -3  -2   0    3.20    1.49
   3   2   1   19.82    5.02
   3   2   1   20.47    2.49
  -3   2  -1   25.72    2.19
  -3   2  -1   26.31    3.59
  -3  -2  -1   22.27    5.05
  -3  -2  -1   24.71    2.16
   3   2   2  171.08    4.18
  -3   2  -2  161.37    6.21
  -3  -2  -2  160.38    8.71
  -3  -2  -2  171.38    3.82
   3   2   3  357.88    8.16
  -3   2  -3  351.22   13.02
  -3  -2  -3  349.25   13.64
  -3  -2  -3  348.20    7.60
   3  -2   3  345.26   11.15
   3   2   4  558.35   14.02
  -3   2  -4  563.98   16.73
   3  -2   4  576.13   17.49
  -3  -2  -4  544.77   14.71
   3   2   5  770.96   21.49
  -3   2  -5  784.91   24.49
   3  -2   5  792.51   30.62
  -3  -2  -5  794.89   23.33
   3   2   6  171.02    7.92
  -3   2  -6  186.53    7.32
   3  -2   6  190.15    8.05
  -3  -2  -6  182.83    7.32
   3   2   7  393.55   11.58
  -3   2  -7  403.82   15.41
   3  -2   7  350.55   16.69
  -3  -2  -7  366.94   12.53
   3   2   8  207.82    7.71
  -3   2  -8  221.05    8.51
   3  -2   8  203.89    9.23
  -3  -2  -8  210.19    8.95
   3   2   9   -1.25    3.82
  -3   2  -9    8.42    4.34
   3  -2   9    5.26    5.00
  -3  -2  -9   -2.81    5.37
   3   2  10  472.12   16.00
  -3   2 -10  468.84   20.74
   3  -2  10  476.10   22.67
  -3  -2 -10  472.19   14.99
   3   2  11  299.70   15.14
  -3   2 -11  297.35   12.18
   3  -2  11  299.42   13.53
  -3  -2 -11  309.29   11.03
   3   2  12  641.08   24.57
  -3   2 -12  660.21   28.80
   3  -2  12  628.93   26.61
  -3  -2 -12  678.94   23.21
   3   2  13   35.32    6.13
  -3   2 -13   31.53    6.21
   3  -2  13   17.38    7.09
  -3  -2 -13   31.61    5.54
   3   2  14   94.34    8.11
  -3   2 -14   88.84   11.65
   3  -2  14   89.94    9.19
  -3  -2 -14   85.47    7.03
   3   2  15  390.53   18.25
  -3   2 -15  384.73   17.22
   3  -2  15  372.55   19.76
  -3  -2 -15  411.14   21.04
   3   2  16   13.23   11.52
  -3   2 -16    5.67   10.49
   3  -2  16    6.67    8.07
  -3  -2 -16   20.05    9.31
   3   2  17  247.04   15.86
  -3   2 -17  263.02   13.97
   3  -2  17  224.72   16.27
  -3  -2 -17  251.39   13.67
   3   2  18   67.40   10.34
  -3   2 -18   63.55    9.07
   3  -2  18   60.33   11.30
  -3  -2 -18   66.49    9.06
   3   2  19  112.87   11.98
  -3   2 -19  104.24   14.99
   3  -2  19   76.86   12.53
  -3  -2 -19   95.79   10.32
   3   2  20  121.35   13.53
  -3   2 -20  125.73   11.63
   3  -2  20  126.36   14.51
  -3  -2 -20  116.30   10.77
   3   2  21    1.97   16.26
  -3   2 -21    9.61    8.86
   3  -2  21    4.35   10.86
  -3  -2 -21    8.89   12.81
   3   2  22   52.80   13.16
  -3   2 -22   31.52   15.41
   3  -2  22   26.51   12.98
  -3  -2 -22   64.71   10.17
   3   2  23   18.53   12.33
  -3   2 -23   21.46    9.23
   3  -2  23   18.57   13.05
  -3  -2 -23    6.82    9.86
   3   2  24   11.64   12.72
  -3   2 -24   21.34   10.19
   3  -2  24   14.94   13.51
  -3  -2 -24    9.75   10.27
   3   2  25   24.92   22.52
  -3   2 -25   70.61   17.91
   3  -2  25   48.55   24.24
  -3  -2 -25   41.73   11.77
  -3  -2 -26   -1.08   17.10
   3   3 -28   22.08    9.43
  -3   3  28   33.68   13.27
   3  -3 -28   41.09   11.58
  -3  -3  28   29.88   13.15
   3   3 -27   -4.08    7.94
  -3   3  27    9.06   16.91
   3  -3 -27   -5.16    9.36
  -3  -3  27    2.52   11.26
   3   3 -26   96.18   10.13
  -3   3  26   95.08   13.38
   3  -3 -26   85.57   12.09
  -3  -3  26   84.73   13.84
   3   3 -25   14.38   10.88
  -3   3  25    1.97   10.10
   3  -3 -25    7.53   13.32
  -3  -3  25   13.78    9.84
   3   3 -24  136.91   10.46
  -3   3  24  156.67   19.82
   3  -3 -24  112.81   16.60
  -3  -3  24  133.87   19.45
   3   3 -23   22.32    6.65
  -3   3  23   16.00    9.07
   3  -3 -23   12.53   12.05
  -3  -3  23   26.51   13.34
   3   3 -22   21.34    9.64
  -3   3  22   16.66    8.80
   3  -3 -22   34.74   11.31
  -3  -3  22   26.80    8.43
   3   3 -21   65.57   10.41
  -3   3  21   72.28    9.44
   3  -3 -21   78.62   12.54
  -3  -3  21   84.27    9.24
   3   3 -20   46.91    5.92
  -3   3  20   62.32    8.12
   3  -3 -20   61.31   11.00
  -3  -3  20   49.94    7.84
   3   3 -19   63.82    5.71
  -3   3  19   62.55   11.64
   3  -3 -19   59.70   10.68
  -3  -3  19   60.56    7.68
   3   3 -18   11.93    6.58
  -3   3  18    9.31    6.02
   3  -3 -18   10.32    8.58
  -3  -3  18   11.16    5.73
   3   3 -17    7.50    4.05
  -3   3  17    0.69    8.25
   3  -3 -17   11.07    5.14
  -3  -3  17    7.83    5.41
   3   3 -16  402.38   12.93
  -3   3  16  405.76   15.84
   3  -3 -16  395.00   15.26
  -3  -3  16  388.20   15.14
   3   3 -15   -0.97    4.93
  -3   3  15    0.58    6.88
   3  -3 -15   -1.13    4.34
  -3  -3  15    1.84    4.10
   3   3 -14   93.40    4.65
  -3   3  14   93.93    6.04
   3  -3 -14  100.38    5.90
  -3  -3  14   91.07    5.62
   3   3 -13   34.23    3.35
  -3   3  13   36.09    4.54
   3  -3 -13   34.14    6.72
  -3  -3  13   35.70    4.17
   3   3 -12  226.38    7.97
  -3   3  12  242.00   10.80
   3  -3 -12  212.22    7.94
  -3  -3  12  217.16    9.43
   3   3 -11    0.22    2.23
  -3   3  11    5.27    3.22
   3  -3 -11   -0.08    3.27
  -3  -3  11    2.88    2.73
   3   3 -10   16.06    3.06
  -3   3  10   13.16    3.48
   3  -3 -10   11.31    3.51
  -3  -3  10   20.27    3.96
   3   3  -9  289.22    6.39
  -3   3   9  290.07    8.41
   3  -3  -9  278.28    8.43
  -3  -3   9  269.17    7.03
   3   3  -8   -1.28    2.38
  -3   3   8    2.21    2.81
   3  -3  -8    2.91    2.86
  -3  -3   8    0.70    1.98
   3   3  -7   29.89    4.86
   3   3  -7   28.66    2.34
  -3   3   7   28.00    3.17
   3  -3  -7   27.05    3.14
  -3  -3   7   30.77    3.02
   3   3  -6   55.07    5.34
   3   3  -6   57.65    2.32
  -3   3   6   55.12    3.36
   3  -3  -6   60.86    5.06
   3   3  -5    7.90    4.29
   3   3  -5    3.27    1.20
   3   3  -5    2.20    1.45
  -3   3   5    7.58    2.48
   3  -3  -5    2.54    4.13
   3   3  -4  576.64   19.11
   3   3  -4  548.30    9.33
   3   3  -4  549.67   10.40
  -3   3   4  600.94   16.86
   3  -3  -4  585.00   14.75
  -3  -3   4  604.22   18.82
   3   3  -3   27.89    7.38
  -3   3   3   32.31    2.97
   3   3  -3   31.21    0.91
  -3  -3   3   30.80    4.68
   3  -3  -3   30.56    3.01
   3   3  -2  881.72   30.70
  -3   3   2  855.73   25.65
   3   3  -2  854.06   16.63
  -3  -3   2  892.16   29.81
   3  -3  -2  831.08   25.90
  -3  -3   2  860.99   17.52
   3   3  -1   24.84    5.06
   3   3  -1   21.66    1.10
  -3   3   1   19.13    2.87
  -3  -3   1   28.31    4.71
  -3  -3   1   18.81    1.68
   3   3   0   20.09    5.27
   3   3   0   26.87    2.07
  -3   3   0   27.45    3.07
  -3  -3   0   20.61    5.17
  -3  -3   0   28.37    2.09
   3   3   1  130.58    7.93
   3   3   1  124.40    3.04
  -3  -3  -1  121.95    7.39
  -3  -3  -1  124.78    2.97
   3   3   2   90.29    2.83
  -3   3  -2   92.79    5.75
  -3  -3  -2   86.86   10.42
  -3  -3  -2   90.94    3.85
   3   3   3  317.75    9.29
  -3   3  -3  313.79   11.22
  -3  -3  -3  339.64   18.96
  -3  -3  -3  344.19    7.69
   3   3   4  406.28   10.11
  -3   3  -4  415.94   13.49
  -3  -3  -4  412.00   22.69
  -3  -3  -4  408.65   11.21
   3   3   5   36.09    4.83
  -3   3  -5   42.44    4.95
  -3  -3  -5   38.35    6.97
  -3  -3  -5   38.43    2.96
   3   3   6  712.27   20.15
  -3   3  -6  758.16   24.72
   3  -3   6  690.92   25.66
  -3  -3  -6  681.68   19.15
   3   3   7   18.39    3.43
  -3   3  -7   15.06    4.65
   3  -3   7    9.71    5.26
  -3  -3  -7   15.39    4.61
   3   3   8  668.45   24.01
  -3   3  -8  648.59   23.56
   3  -3   8  739.09   26.91
  -3  -3  -8  671.48   23.17
   3   3   9   42.97    4.62
  -3   3  -9   33.63    5.14
   3  -3   9   28.86    5.87
  -3  -3  -9   26.34    3.91
   3   3  10   56.80    5.50
  -3   3 -10   74.17    6.09
   3  -3  10   43.97    7.12
  -3  -3 -10   61.62    4.79
   3   3  11   53.57    6.15
  -3   3 -11   51.22    6.23
   3  -3  11   58.89    7.69
  -3  -3 -11   65.46    5.21
   3   3  12   64.20    9.76
  -3   3 -12   62.22    9.78
   3  -3  12   66.47   11.71
  -3  -3 -12   60.51    5.62
   3   3  13   94.75    8.00
  -3   3 -13  125.84    8.56
   3  -3  13  101.97    9.78
  -3  -3 -13   97.06   10.52
   3   3  14  964.48   40.64
  -3   3 -14  914.69   46.27
   3  -3  14  867.72   42.84
  -3  -3 -14  915.09   44.04
   3   3  15   54.53    7.88
  -3   3 -15   52.53    7.75
   3  -3  15   67.37    9.40
  -3  -3 -15   59.21   10.66
   3   3  16  268.73   20.83
  -3   3 -16  265.49   19.73
   3  -3  16  256.02   16.88
  -3  -3 -16  259.36   13.02
   3   3  17   18.68    7.88
  -3   3 -17   26.32    7.60
   3  -3  17   14.10    9.24
  -3  -3 -17    7.01    6.93
   3   3  18  109.53   11.43
  -3   3 -18  111.33   10.97
   3  -3  18   91.56   12.68
  -3  -3 -18  123.99    9.60
   3   3  19   65.62   11.40
  -3   3 -19   83.98    9.74
   3  -3  19   79.92   12.72
  -3  -3 -19   73.35    9.14
   3   3  20   41.62   16.40
  -3   3 -20   45.12    9.30
   3  -3  20   34.69   12.44
  -3  -3 -20   42.74    9.25
   3   3  21    4.11   11.44
  -3   3 -21   26.88   13.66
   3  -3  21   22.62   11.84
  -3  -3 -21   20.27    8.89
   3   3  22   34.68   12.44
  -3   3 -22   34.84   10.37
   3  -3  22   42.37   13.27
  -3  -3 -22   55.57   15.18
   3   3  23   11.88   12.16
  -3   3 -23   12.40    9.91
   3  -3  23    3.67   13.40
  -3  -3 -23    5.13    9.63
   3   3  24   33.01   22.20
  -3   3 -24   33.00   17.50
   3  -3  24   56.32   15.39
  -3  -3 -24   36.97   11.41
   3   3  25   -0.66   13.79
  -3   3 -25   -0.54   10.64
   3  -3  25   -0.31   14.62
  -3  -3 -25    1.55   10.90
   3   4 -27   81.37   15.37
  -3   4  27   70.12   14.37
   3  -4 -27   88.53   18.56
  -3  -4  27   47.67   14.45
   3   4 -26    4.16    7.73
  -3   4  26   16.09   16.73
   3  -4 -26   16.31   14.47
  -3  -4  26    6.46   11.11
   3   4 -25   70.08    9.05
  -3   4  25   87.96   13.03
   3  -4 -25   72.19   11.37
  -3  -4  25   66.82   12.94
   3   4 -24   16.98   10.45
  -3   4  24    7.85    9.87
   3  -4 -24    9.48    8.54
  -3  -4  24    2.65    9.70
   3   4 -23   68.94    8.21
  -3   4  23   66.69   16.53
   3  -4 -23   74.91   10.38
  -3  -4  23   83.54   11.14
   3   4 -22    0.28    5.81
  -3   4  22    7.59    8.29
   3  -4 -22   16.41    7.54
  -3  -4  22    6.91    8.49
   3   4 -21   11.90    8.29
  -3   4  21    3.50   12.47
   3  -4 -21   15.16    6.90
  -3  -4  21    2.48    7.49
   3   4 -20    9.47    5.26
  -3   4  20   -0.54    7.47
   3  -4 -20   20.66    6.75
  -3  -4  20   10.11    7.23
   3   4 -19   21.18    4.94
  -3   4  19   28.00    7.30
   3  -4 -19   14.51   10.25
  -3  -4  19   17.56    7.01
   3   4 -18   -3.03    6.57
  -3   4  18    1.59    6.07
   3  -4 -18   -2.13    8.87
  -3  -4  18   -4.58    6.02
   3   4 -17   50.13    5.04
  -3   4  17   39.34    6.64
   3  -4 -17   48.43    6.31
  -3  -4  17   38.98    6.46
   3   4 -16   21.41    4.22
  -3   4  16   36.63    5.75
   3  -4 -16   14.97    5.53
  -3  -4  16   22.75    5.39
   3   4 -15  464.62   17.37
  -3   4  15  443.45   17.44
   3  -4 -15  479.70   17.73
  -3  -4  15  457.94   17.05
   3   4 -14   60.36    4.18
  -3   4  14   71.07    6.11
   3  -4 -14   77.00    5.93
  -3  -4  14   57.26    8.07
   3   4 -13  266.65   10.54
  -3   4  13  290.63   13.45
   3  -4 -13  286.93   13.74
  -3  -4  13  271.23    9.95
   3   4 -12    7.03    2.84
  -3   4  12   14.35    4.19
   3  -4 -12    1.21    4.38
  -3  -4  12   10.93    3.78
   3   4 -11    2.85    2.43
  -3   4  11    1.79    3.91
   3  -4 -11   -2.24    3.85
  -3  -4  11   -0.13    3.28
   3   4 -10    1.00    3.45
  -3   4  10    5.46    3.57
   3  -4 -10   -2.47    3.57
  -3  -4  10    6.25    4.49
   3   4  -9  281.66   12.29
   3   4  -9  299.60    8.57
  -3   4   9  279.51   11.49
   3  -4  -9  288.76    9.42
   3   4  -8   -0.34    4.85
   3   4  -8   -1.41    2.87
  -3   4   8    1.96    4.92
   3  -4  -8    1.81    3.40
   3   4  -7   95.77    6.87
   3   4  -7   89.33    2.87
  -3   4   7   99.86    4.57
   3  -4  -7   98.05    6.77
   3   4  -6   24.94    5.39
   3   4  -6   24.86    2.16
   3   4  -6   24.91    1.86
  -3   4   6   27.49    3.40
   3  -4  -6   20.06    3.52
   3   4  -5  560.94   20.49
   3   4  -5  582.43   11.18
   3   4  -5  560.13   13.47
  -3   4   5  613.87   19.29
   3  -4  -5  541.92   15.84
   3   4  -4   74.51    6.24
  -3   4   4   61.42    5.72
   3   4  -4   72.76    2.42
  -3  -4   4   84.54    5.74
   3  -4  -4   69.77    4.03
   3   4  -3  167.82   11.73
  -3   4   3  169.06    5.90
   3   4  -3  174.30    3.24
  -3  -4   3  149.60   11.01
   3  -4  -3  169.57    6.05
   3   4  -2   26.13    5.54
   3   4  -2   25.63    1.40
  -3   4   2   22.98    3.36
   3  -4  -2   32.57    5.36
  -3  -4   2   24.44    5.12
  -3  -4   2   31.22    2.32
   3   4  -1  640.10   23.80
   3   4  -1  638.20   13.40
  -3   4   1  666.01   18.43
  -3  -4   1  638.15   23.25
  -3  -4   1  650.40   13.86
   3   4   0  173.19    9.14
   3   4   0  172.32    3.92
  -3   4   0  160.38    5.81
  -3  -4   0  185.99   12.77
  -3  -4   0  157.85    3.80
   3   4   1   25.57    9.07
   3   4   1   16.01    1.92
  -3   4  -1   15.05    3.47
  -3  -4  -1   16.74    5.62
  -3  -4  -1   15.87    2.88
   3   4   2  125.83    3.83
  -3   4  -2  133.63    5.56
  -3  -4  -2  128.18    8.87
  -3  -4  -2  129.87    5.04
   3   4   3 1195.14   35.28
  -3   4  -3 1165.66   45.16
  -3  -4  -3 1103.22   49.10
  -3  -4  -3 1148.69   36.38
   3   4   4   49.99    4.53
  -3   4  -4   41.05    5.71
  -3  -4  -4   54.66    7.37
  -3  -4  -4   43.84    3.06
   3   4   5  518.23   14.15
  -3   4  -5  536.83   19.05
  -3  -4  -5  510.86   29.57
  -3  -4  -5  527.12   13.87
   3   4   6    9.07    4.74
  -3   4  -6    3.27    4.98
  -3  -4  -6    8.92    7.37
  -3  -4  -6    6.70    2.92
   3   4   7  333.89   10.36
  -3   4  -7  318.84   12.67
  -3  -4  -7  321.41   11.99
   3   4   8   11.84    3.91
  -3   4  -8    7.50    5.20
   3  -4   8   11.53    6.22
  -3  -4  -8   11.60    3.48
   3   4   9   71.83    5.31
  -3   4  -9   76.45    9.83
   3  -4   9   62.18    7.69
  -3  -4  -9   62.33    4.94
   3   4  10    4.51    4.36
  -3   4 -10    2.40    5.43
   3  -4  10    8.34    9.95
  -3  -4 -10    1.25    4.08
   3   4  11  112.88    6.91
  -3   4 -11  100.60    8.05
   3  -4  11   87.71    9.32
  -3  -4 -11   99.27    6.30
   3   4  12   41.97    9.32
  -3   4 -12   36.59    9.94
   3  -4  12   44.69    8.27
  -3  -4 -12   28.71    5.37
   3   4  13    0.96    5.90
  -3   4 -13   13.28    6.36
   3  -4  13    4.11    8.04
  -3  -4 -13    8.94    5.29
   3   4  14  109.18    9.02
  -3   4 -14  113.43    9.44
   3  -4  14  106.33   16.49
  -3  -4 -14  108.32    7.86
   3   4  15  129.74   14.65
  -3   4 -15  123.54   10.00
   3  -4  15  111.86   12.03
  -3  -4 -15  133.41    8.89
   3   4  16   22.21    7.78
  -3   4 -16   20.07    7.34
   3  -4  16   23.44    9.96
  -3  -4 -16   24.77    6.83
   3   4  17  197.91   13.41
  -3   4 -17  182.45   12.99
   3  -4  17  163.16   15.56
  -3  -4 -17  177.81   11.64
   3   4  18   -4.30    8.71
  -3   4 -18    3.15   12.25
   3  -4  18   16.78   10.68
  -3  -4 -18    9.95    7.32
   3   4  19   23.66   15.48
  -3   4 -19   33.72    9.51
   3  -4  19   26.18   11.80
  -3  -4 -19   43.09    8.95
   3   4  20  -13.42    9.93
  -3   4 -20   11.23   13.58
   3  -4  20  -10.13   11.45
  -3  -4 -20    0.04    8.62
   3   4  21   -8.77   10.42
  -3   4 -21    8.59    8.67
   3  -4  21    3.50   12.09
  -3  -4 -21   -5.07    8.85
   3   4  22   -5.60   17.40
  -3   4 -22   17.38    9.46
   3  -4  22   -7.71   13.09
  -3  -4 -22   11.69    9.17
   3   4  23   43.03   14.32
  -3   4 -23   66.13   16.62
   3  -4  23   30.09   15.74
  -3  -4 -23   47.08   16.94
   3   4  24  -10.16   13.40
  -3   4 -24    9.94   10.56
   3  -4  24   12.45   14.83
  -3  -4 -24   23.08   15.98
   3   4  25   83.58   17.41
  -3   4 -25   91.22   14.20
   3  -4  25   44.57   18.83
  -3  -4 -25   76.49   14.23
   3   5 -26   77.95   15.08
  -3   5  26   77.07   14.92
   3  -5 -26   99.22   12.89
  -3  -5  26   77.71   14.54
   3   5 -25    2.91    7.33
  -3   5  25    2.77   16.56
   3  -5 -25   11.85    9.57
  -3  -5  25    3.96   11.01
   3   5 -24   41.50    7.80
  -3   5  24   34.93   11.34
   3  -5 -24   43.66   10.27
  -3  -5  24   31.69   11.53
   3   5 -23    5.62    9.85
  -3   5  23    7.70    9.23
   3  -5 -23    8.13    8.51
  -3  -5  23    1.92    9.51
   3   5 -22    8.35    6.41
  -3   5  22   28.15   14.08
   3  -5 -22   22.30    8.55
  -3  -5  22   21.36    9.35
   3   5 -21   33.33    6.27
  -3   5  21   35.15    8.80
   3  -5 -21   18.93    8.40
  -3  -5  21   17.93    8.74
   3   5 -20    7.04    8.46
  -3   5  20   18.27   12.30
   3  -5 -20    5.87    7.08
  -3  -5  20   10.00    7.68
   3   5 -19   52.05    6.47
  -3   5  19   61.54    8.94
   3  -5 -19   62.39    8.20
  -3  -5  19   58.12   12.38
   3   5 -18    4.55    7.38
  -3   5  18    4.83   10.56
   3  -5 -18    7.24    6.39
  -3  -5  18    3.78   10.16
   3   5 -17    4.68    4.33
  -3   5  17    8.46    6.23
   3  -5 -17    4.71    9.53
  -3  -5  17   -2.07    6.33
   3   5 -16  400.86   13.59
  -3   5  16  408.02   22.46
   3  -5 -16  365.97   16.62
  -3  -5  16  384.39   16.62
   3   5 -15    2.38    3.79
  -3   5  15   -0.94    5.50
   3  -5 -15    2.70    5.48
  -3  -5  15    2.73    5.29
   3   5 -14  192.46    9.47
  -3   5  14  146.65   12.27
   3  -5 -14  160.71    9.18
  -3  -5  14  180.73   12.21
   3   5 -13   97.99    4.90
  -3   5  13   87.12    6.51
   3  -5 -13   98.51   10.10
  -3  -5  13   77.87    6.23
   3   5 -12  299.57    9.23
  -3   5  12  304.24   11.53
   3  -5 -12  293.45   11.65
   3   5 -11  191.54   11.39
   3   5 -11  190.42    7.98
  -3   5  11  186.59   11.21
   3  -5 -11  168.30    8.36
   3   5 -10    5.26    5.86
   3   5 -10   -0.48    4.00
  -3   5  10    5.19    4.05
   3  -5 -10   -2.31    4.32
   3   5  -9  107.19    8.79
   3   5  -9  117.57    5.97
  -3   5   9  123.60    6.28
   3  -5  -9  117.64    6.27
   3   5  -8  413.17   17.01
   3   5  -8  402.03   10.24
  -3   5   8  385.37   12.63
   3  -5  -8  406.11   13.46
   3   5  -7  213.80   15.05
   3   5  -7  212.69    5.17
   3   5  -7  225.78    7.26
  -3   5   7  225.49   10.48
   3  -5  -7  212.69    8.23
   3   5  -6  565.95   21.97
   3   5  -6  549.91   11.98
   3   5  -6  572.85   14.30
  -3   5   6  563.65   19.84
   3  -5  -6  551.76   17.36
   3   5  -5    5.55    5.36
  -3   5   5   -7.62    5.57
   3   5  -5    5.82    2.34
   3   5  -5    5.69    2.34
   3  -5  -5    3.60    3.53
   3   5  -4  859.43   34.56
  -3   5   4  921.72   28.64
   3   5  -4  904.81   22.98
  -3  -5   4  864.45   32.45
   3  -5  -4  880.80   29.20
   3   5  -3   18.18    1.66
   3   5  -3   20.46    6.12
  -3   5   3   14.87    3.65
   3  -5  -3   18.08    2.24
  -3  -5   3   18.51    8.12
   3  -5  -3   19.62    6.17
   3   5  -2  346.52    8.17
   3   5  -2  341.59   18.79
  -3   5   2  330.65   10.18
   3  -5  -2  344.07   13.81
  -3  -5   2  328.43   13.59
  -3  -5   2  350.60    8.69
   3  -5  -2  305.85    7.28
   3   5  -1   37.25    2.21
  -3   5   1   37.73    3.90
   3  -5  -1   32.36    1.27
  -3  -5   1   27.36    6.05
  -3  -5   1   41.69    3.24
   3   5   0   16.36    6.20
   3   5   0   15.12    2.02
  -3   5   0   10.83    3.51
  -3  -5   0    2.41    6.08
  -3  -5   0   11.07    2.04
   3   5   1    5.45    6.12
   3   5   1    1.41    2.10
  -3   5  -1   -0.61    3.58
  -3  -5  -1   10.70    5.98
  -3  -5  -1    9.34    3.30
   3   5   2   18.27    2.39
  -3   5  -2   11.88    0.96
  -3   5  -2   14.21    3.95
  -3  -5  -2    7.80    6.28
  -3  -5  -2   13.08    3.60
   3   5   3   54.87    4.71
  -3   5  -3   47.30    2.37
  -3   5  -3   52.52    4.82
  -3  -5  -3   48.75    7.77
  -3  -5  -3   61.09    4.53
   3   5   4   99.62    4.20
  -3   5  -4   98.30   10.49
  -3   5  -4   91.15    3.63
  -3  -5  -4   86.54    4.10
  -3  -5  -4  105.69    9.41
   3   5   5   76.30    4.20
  -3   5  -5   68.41   10.18
  -3  -5  -5   75.87   13.91
  -3  -5  -5   72.86    4.05
   3   5   6  212.78    7.30
  -3   5  -6  232.02   14.74
  -3  -5  -6  224.06   14.11
  -3  -5  -6  223.73    9.37
   3   5   7   18.25    3.69
  -3   5  -7   15.41    5.54
  -3  -5  -7    8.02    8.58
  -3  -5  -7    9.42    3.46
   3   5   8   26.76    4.13
  -3   5  -8   26.27    5.97
  -3  -5  -8   26.34    9.36
  -3  -5  -8   15.24    4.14
   3   5   9   15.51    4.61
  -3   5  -9   20.46    6.11
  -3  -5  -9   18.45    6.26
   3   5  10   52.97    5.83
  -3   5 -10   68.60   11.05
  -3  -5 -10   57.11    7.90
   3   5  11   31.49    8.42
  -3   5 -11   45.36    7.03
  -3  -5 -11   29.10    5.21
   3   5  12    7.82    5.38
  -3   5 -12    7.91    6.30
   3  -5  12    1.13    7.93
  -3  -5 -12    6.83    4.99
   3   5  13   21.01    6.50
  -3   5 -13   30.50    7.42
   3  -5  13   10.46    9.11
  -3  -5 -13   31.32    5.96
  -3   5 -14   78.95    9.07
   3  -5  14   71.93   11.60
  -3  -5 -14   87.83    7.60
   3   5  15   88.45    9.48
  -3   5 -15  105.66   14.55
   3  -5  15   96.42   17.82
  -3  -5 -15   88.83    8.32
   3   5  16    4.09    7.70
  -3   5 -16   13.61    7.65
   3  -5  16   13.24   15.08
  -3  -5 -16    8.47    6.59
   3   5  17    7.54   12.37
  -3   5 -17   -0.53   12.39
   3  -5  17    8.67   10.35
  -3  -5 -17    3.02    6.91
   3   5  18   50.39    9.99
  -3   5 -18   48.88    9.43
   3  -5  18   55.03   12.58
  -3  -5 -18   43.94    8.68
   3   5  19   33.05   10.11
  -3   5 -19   26.25   14.82
   3  -5  19   29.25   12.71
  -3  -5 -19   13.52    8.55
   3   5  20   24.19   10.78
  -3   5 -20   20.21    9.69
   3  -5  20   29.96   13.24
  -3  -5 -20   22.74    9.30
   3   5  21   12.56   17.23
  -3   5 -21    8.61    9.99
   3  -5  21   20.93   13.24
  -3  -5 -21   10.47    8.98
   3   5  22   -1.99   11.53
  -3   5 -22   25.05   14.53
   3  -5  22    6.86   14.30
  -3  -5 -22   -1.21    9.35
   3   5  23    8.03   11.87
  -3   5 -23    2.39   10.17
   3  -5  23   -2.61   14.18
  -3  -5 -23   -2.11   10.09
   3   5  24   27.53   21.68
  -3   5 -24   47.59   17.82
   3  -5  24   14.89   17.46
  -3  -5 -24   36.14   18.17
   3   6 -25   10.43    7.60
  -3   6  25   17.82   11.73
   3  -6 -25   13.76   10.83
  -3  -6  25   23.01   18.91
   3   6 -24   19.70    7.59
  -3   6  24   28.84   10.89
   3  -6 -24   38.23   10.73
  -3  -6  24   19.60   18.41
   3   6 -23   41.43    7.85
  -3   6  23   48.44   11.34
   3  -6 -23   49.88   10.84
  -3  -6  23   47.86   17.67
   3   6 -22   34.74   10.67
  -3   6  22   47.95   10.41
   3  -6 -22   23.74    9.69
  -3  -6  22   42.20   16.67
   3   6 -21   10.17    6.11
  -3   6  21    5.80   13.64
   3  -6 -21   11.73    8.29
  -3  -6  21    4.93    9.15
   3   6 -20   75.01    7.50
  -3   6  20   82.86   10.58
   3  -6 -20   85.60   10.09
  -3  -6  20   72.84   10.66
   3   6 -19   60.28    6.53
  -3   6  19   57.79   14.12
   3  -6 -19   55.77    9.01
  -3  -6  19   58.21    9.52
   3   6 -18  153.31    8.39
  -3   6  18  139.74   11.48
   3  -6 -18  146.19   11.26
  -3  -6  18  155.64   11.62
   3   6 -17   64.35    6.10
  -3   6  17   58.70   12.67
   3  -6 -17   60.49    8.26
   3   6 -16    5.31    4.30
  -3   6  16    5.27    6.51
   3  -6 -16    4.84    9.85
   3   6 -15  340.10   12.26
  -3   6  15  356.09   21.01
   3  -6 -15  339.69   16.07
   3   6 -14   57.67    9.45
   3   6 -14   42.23    7.13
  -3   6  14   48.62    6.93
   3  -6 -14   55.55    7.08
   3   6 -13  164.80   12.31
   3   6 -13  169.92    6.88
  -3   6  13  159.30   13.06
   3  -6 -13  152.96    9.37
   3   6 -12  155.26   16.80
   3   6 -12  151.72    6.18
  -3   6  12  148.28    8.61
   3  -6 -12  133.30    8.32
   3   6 -11   73.82    9.57
   3   6 -11   88.06    4.75
  -3   6  11   84.53    7.14
   3  -6 -11   96.26    7.20
   3   6 -10  547.38   29.57
   3   6 -10  493.94   14.53
  -3   6  10  498.13   22.18
   3  -6 -10  489.53   22.09
   3   6  -9    3.80    6.63
   3   6  -9    1.47    3.80
   3   6  -9   -0.77    2.98
  -3   6   9    5.98    4.51
   3  -6  -9   -0.57    4.82
   3   6  -8  454.36   19.94
   3   6  -8  449.34   12.86
   3   6  -8  430.19   12.33
  -3   6   8  443.42   15.66
   3  -6  -8  451.44   19.83
   3   6  -7  207.54   15.91
   3   6  -7  184.85    5.05
   3   6  -7  203.56    8.73
  -3   6   7  194.66    8.28
   3  -6  -7  208.19    8.57
  -3   6   6    7.72    6.41
   3   6  -6    6.10    2.02
   3   6  -6    6.05    2.98
   3  -6  -6   -0.86    4.44
   3   6  -5  534.66   22.20
   3   6  -5  514.67   13.77
  -3   6   5  520.23   16.58
   3  -6  -5  503.52   20.36
   3   6  -4    3.58    1.99
   3   6  -4    6.65    6.21
  -3   6   4    7.43    3.92
   3  -6  -4    6.84    4.61
  -3  -6   4    8.60    5.30
   3  -6  -4    2.71    4.25
   3   6  -3  136.01    3.96
   3   6  -3  106.63    9.13
  -3   6   3  137.29    6.31
   3  -6  -3  134.86    6.92
   3  -6  -3  128.84    4.45
   3   6  -2  430.22   19.88
   3   6  -2  451.43   10.79
  -3   6   2  460.68   14.49
   3  -6  -2  427.60    9.71
   3  -6  -2  456.77   15.53
  -3  -6   2  495.52   24.66
  -3  -6   2  434.09   10.97
   3   6  -1  378.83   17.17
   3   6  -1  379.56   10.74
  -3   6   1  370.86   12.41
   3  -6  -1  358.47    7.33
  -3  -6   1  383.51   21.87
  -3  -6   1  349.38   10.94
   3   6   0  416.68   19.54
   3   6   0  409.18   12.24
  -3   6   0  402.92   16.85
  -3  -6   0  464.64   25.44
  -3  -6   0  423.91   10.83
   3   6   1   18.44    7.07
   3   6   1    8.04    2.63
  -3   6  -1    3.00    4.31
  -3  -6  -1    3.36   10.97
  -3  -6  -1   10.17    2.75
   3   6   2  132.02    4.87
  -3   6  -2  122.25    6.44
  -3  -6  -2  122.65   14.58
  -3  -6  -2  126.75    4.79
   3   6   3  177.82    5.90
  -3   6  -3  163.32    4.53
  -3   6  -3  167.53    7.72
  -3  -6  -3  161.99   11.45
  -3  -6  -3  163.40    5.87
   3   6   4  418.53   14.51
  -3   6  -4  435.05    9.68
  -3   6  -4  414.54   19.04
  -3   6  -4  426.19   18.65
  -3  -6  -4  416.15   21.27
  -3  -6  -4  409.03   12.15
   3   6   5  195.25    7.10
  -3   6  -5  200.52    6.86
  -3   6  -5  200.71    9.26
  -3   6  -5  214.13   11.39
  -3  -6  -5  187.50   14.12
  -3  -6  -5  186.53    7.15
   3   6   6    8.50    5.61
  -3   6  -6    0.06    6.37
  -3   6  -6   11.19    3.94
  -3  -6  -6   11.01    3.68
  -3  -6  -6   25.37    8.52
   3   6   7  188.78    7.63
  -3   6  -7  171.35   14.94
  -3  -6  -7  174.49   14.60
  -3  -6  -7  184.85    7.55
   3   6   8  111.02    9.10
  -3   6  -8   94.17    8.84
  -3  -6  -8   98.63   19.08
  -3  -6  -8  111.65    6.11
   3   6   9   52.66    5.70
  -3   6  -9   63.73    7.81
  -3  -6  -9   44.13   12.06
  -3  -6  -9   58.55    5.44
   3   6  10   25.60    8.34
  -3   6 -10   34.64    7.29
  -3  -6 -10   45.27   11.56
  -3  -6 -10   42.34    5.37
   3   6  11   10.03    5.84
  -3   6 -11   14.81   11.10
  -3  -6 -11   15.79    7.84
   3   6  12   74.68    7.54
  -3   6 -12   87.18    9.22
  -3  -6 -12   82.96    7.09
   3   6  13    8.92    9.69
  -3   6 -13    5.93    7.29
  -3  -6 -13    3.56    5.92
   3   6  14   38.57    7.68
  -3   6 -14   38.81    8.38
  -3  -6 -14   37.85    6.78
   3   6  15   14.70    7.81
  -3   6 -15   18.88    8.33
  -3  -6 -15   24.87    6.70
   3   6  16    9.28   12.26
  -3   6 -16   11.34    8.09
  -3  -6 -16    3.91    7.06
   3   6  17  151.69   13.62
  -3   6 -17  160.10   13.11
  -3  -6 -17  130.90   11.28
   3   6  18   -5.20    9.36
  -3   6 -18    8.77    8.95
   3  -6  18   -3.72   12.20
  -3  -6 -18    8.10    7.92
   3   6  19   25.25   16.45
  -3   6 -19   32.09   10.23
   3  -6  19   18.52   13.29
  -3  -6 -19   33.01    9.28
   3   6  20   39.41   11.85
  -3   6 -20   46.93   10.82
   3  -6  20   47.82   15.29
  -3  -6 -20   27.53   10.30
   3   6  21    2.74   10.78
  -3   6 -21   -9.68   10.09
   3  -6  21   16.17   14.06
  -3  -6 -21    6.62    9.57
   3   6  22   -1.04   20.72
  -3   6 -22   38.68   11.34
   3  -6  22   36.08   15.99
  -3  -6 -22   27.28   10.83
   3   6  23   12.37   13.61
  -3   6 -23   25.40   16.94
   3  -6  23   11.60   16.02
  -3  -6 -23   23.81   11.22
   3   7 -24   14.40    7.61
  -3   7  24   12.57   11.64
   3  -7 -24   20.75   15.95
   3   7 -23   18.36   11.91
  -3   7  23   39.20   11.92
   3  -7 -23   31.05   16.24
   3   7 -22    9.38    6.83
  -3   7  22   34.46   15.80
   3  -7 -22    7.72   15.31
   3   7 -21  116.23   13.20
  -3   7  21  112.04   12.90
   3  -7 -21  109.60   18.75
   3   7 -20   11.09    6.00
  -3   7  20   21.43    9.16
   3  -7 -20   20.55    9.34
   3   7 -19  135.23   12.68
  -3   7  19  130.90   12.64
   3  -7 -19  150.57   12.70
   3   7 -18   44.43   11.67
   3   7 -18   29.64    6.02
  -3   7  18   23.25    8.55
   3  -7 -18   23.51    8.67
   3   7 -17   68.09   12.36
   3   7 -17   78.77   10.11
  -3   7  17   91.16    9.72
   3  -7 -17   79.13    9.68
   3   7 -16   55.38   11.30
   3   7 -16   61.29    5.98
  -3   7  16   62.95    8.93
   3  -7 -16   57.70    8.43
   3   7 -15   71.10   16.16
   3   7 -15   43.13    5.62
  -3   7  15   46.94    8.06
   3  -7 -15   48.41   12.19
   3   7 -14   20.26    9.61
   3   7 -14   22.84    7.16
  -3   7  14   21.19    6.88
   3  -7 -14   21.64    7.01
   3   7 -13  175.25   13.83
   3   7 -13  175.17    7.81
  -3   7  13  158.41   10.50
   3  -7 -13  158.73   10.86
   3   7 -12   68.35   10.04
   3   7 -12   61.57    4.77
   3   7 -12   67.62    5.21
  -3   7  12   68.42   10.65
   3  -7 -12   72.96   11.08
   3   7 -11  284.27   16.54
   3   7 -11  283.08   10.44
  -3   7  11  296.19   12.88
   3  -7 -11  282.60   13.21
   3   7 -10   20.24    8.48
   3   7 -10   29.38    5.44
   3   7 -10   33.81    4.41
  -3   7  10   31.98    6.05
   3  -7 -10   32.05    6.28
   3   7  -9  224.69   18.45
   3   7  -9  198.88    6.45
   3   7  -9  201.89    7.89
  -3   7   9  211.99    9.97
   3  -7  -9  181.91    9.87
   3   7  -8   26.08    8.15
   3   7  -8   38.28    3.24
   3   7  -8   36.29    4.28
  -3   7   8   35.23    5.89
   3  -7  -8   33.66    5.97
   3   7  -7  376.58   18.28
  -3   7   7  345.86   13.32
   3   7  -7  367.97    9.67
   3   7  -7  335.96   14.57
   3  -7  -7  367.38   14.57
   3   7  -6  111.78    4.37
   3   7  -6  142.07   15.35
  -3   7   6  111.67    7.19
   3   7  -6  119.31    6.21
   3  -7  -6  118.81    7.31
   3  -7  -6  122.00    7.77
  -3   7   5   15.18    4.77
   3   7  -5    5.37    3.82
   3  -7  -5    7.18    5.13
   3  -7  -5    8.96    6.39
   3   7  -4  121.40    5.74
   3   7  -4  112.38    9.85
  -3   7   4  109.04    6.82
   3  -7  -4  113.93    5.50
  -3  -7   4  122.91    8.56
   3  -7  -4  105.34    7.25
   3   7  -3    2.11    7.17
  -3   7   3    7.85    7.07
   3   7  -3   14.79    3.97
   3  -7  -3    9.17    2.89
  -3  -7   3   11.18    6.32
   3  -7  -3    6.62    5.23
   3   7  -2   96.54   10.03
   3   7  -2  102.34    4.16
  -3   7   2   98.32    6.41
   3  -7  -2   94.94    4.79
   3  -7  -2   95.19    6.88
  -3  -7   2  103.97    8.63
  -3  -7   2  101.79    4.56
   3   7  -1  160.62   12.58
   3   7  -1  173.52    5.68
  -3   7   1  170.07    8.11
   3  -7  -1  178.77    4.13
  -3  -7   1  168.47   11.07
  -3  -7   1  188.85    7.91
   3   7   0   13.48    8.44
   3   7   0   20.03    3.13
  -3   7   0   17.31    4.87
  -3  -7   0    9.80    6.88
  -3  -7   0   14.52    3.26
   3   7   1  856.47   26.54
  -3   7  -1  834.51   35.25
  -3  -7  -1  894.16   40.13
  -3  -7  -1  852.64   26.85
   3   7   2   18.58    5.20
  -3   7  -2    3.55    5.41
  -3  -7  -2   15.06    8.00
  -3  -7  -2   10.34    3.40
   3   7   3  577.74   17.05
  -3   7  -3  554.07   20.05
  -3  -7  -3  534.58   36.00
  -3  -7  -3  541.75   20.23
   3   7   4  338.01   10.66
  -3   7  -4  309.26    9.09
  -3   7  -4  323.31   16.44
  -3   7  -4  297.97   17.10
  -3  -7  -4  306.35   10.58
  -3  -7  -4  291.16   18.46
   3   7   5   39.59    6.14
  -3   7  -5   18.58    4.32
  -3   7  -5   10.75    5.87
  -3   7  -5   25.33    7.64
  -3  -7  -5   16.92    9.66
  -3  -7  -5   27.85    4.09
   3   7   6  166.50    7.41
  -3   7  -6  181.83    7.94
  -3   7  -6  153.61    9.09
  -3   7  -6  182.47   16.47
  -3  -7  -6  195.86   21.46
  -3  -7  -6  173.59   10.31
   3   7   7    4.62    6.61
  -3   7  -7    6.39    3.36
  -3   7  -7    5.01    5.84
  -3   7  -7    4.84    7.15
  -3  -7  -7   10.14    9.95
  -3  -7  -7    6.43    4.35
   3   7   8   12.89    4.89
  -3   7  -8   17.16    7.36
  -3   7  -8   12.81    3.97
  -3  -7  -8   10.57    4.69
  -3  -7  -8   14.68   15.97
   3   7   9  295.55   15.83
  -3   7  -9  276.40   21.29
  -3   7  -9  297.22   10.63
  -3  -7  -9  277.30   11.82
  -3  -7  -9  293.81   21.91
   3   7  10    3.50    5.35
  -3   7 -10    4.96    7.63
  -3  -7 -10   14.14   17.87
  -3  -7 -10    6.26    5.13
   3   7  11  223.42   11.55
  -3   7 -11  272.12   14.95
  -3  -7 -11  221.07   21.38
  -3  -7 -11  220.31   11.04
   3   7  12   31.55    6.71
  -3   7 -12   37.82   12.51
  -3  -7 -12   17.94   14.06
  -3  -7 -12   16.51    9.67
   3   7  13   55.83    8.29
  -3   7 -13   59.98    9.96
  -3  -7 -13   72.14   16.09
  -3  -7 -13   50.12    7.58
   3   7  14   38.71   11.77
  -3   7 -14   28.89    8.89
  -3  -7 -14   19.55    7.13
   3   7  15    9.24    8.50
  -3   7 -15   30.33    9.00
  -3  -7 -15   29.55    7.68
   3   7  16   16.49    8.86
  -3   7 -16   25.00    9.38
  -3  -7 -16   28.76    8.17
   3   7  17    0.79   13.50
  -3   7 -17  -15.28   14.05
  -3  -7 -17    9.78    8.05
   3   7  18   41.55   10.98
  -3   7 -18   41.07   10.45
  -3  -7 -18   18.81    9.59
   3   7  19   74.73   13.02
  -3   7 -19   89.09   12.60
  -3  -7 -19   80.43   11.88
   3   7  20   15.52   11.28
  -3   7 -20    6.45   10.10
  -3  -7 -20   10.51    9.47
   3   7  21   69.88   14.11
  -3   7 -21   49.46   12.73
  -3  -7 -21   64.69   11.94
   3   7  22    8.50   12.63
  -3   7 -22   14.65   11.50
  -3  -7 -22    6.30   10.85
   3   8 -23    8.95    7.88
  -3   8  23   -1.29   12.04
   3  -8 -23   15.59   10.73
   3   8 -22   52.18   12.73
  -3   8  22   71.21   12.40
   3  -8 -22   49.09   12.24
   3   8 -21   -9.68   13.07
   3   8 -21   11.76    6.82
  -3   8  21   -3.13   10.12
   3  -8 -21   22.46    9.85
   3   8 -20   81.62   22.68
  -3   8  20   67.79   17.65
   3  -8 -20   54.55   16.95
   3   8 -19   18.19   19.67
   3   8 -19    2.90    6.43
  -3   8  19    4.50    9.36
   3  -8 -19   20.41   13.88
   3   8 -18  171.34   18.31
   3   8 -18  150.47   14.33
  -3   8  18  201.57   20.12
   3  -8 -18  156.97   13.88
   3   8 -17   -0.77   11.20
   3   8 -17   -1.27    5.66
  -3   8  17   -4.98    8.29
   3  -8 -17   -0.24    8.26
   3   8 -16   23.89   11.16
   3   8 -16   18.20    5.74
  -3   8  16   14.46   12.32
   3  -8 -16   14.63    8.36
   3   8 -15   -3.20   10.10
   3   8 -15   -1.02    7.76
  -3   8  15    1.19    7.33
   3  -8 -15    2.12    7.58
   3   8 -14   20.91   10.74
   3   8 -14   21.13    4.79
   3   8 -14   24.20    5.45
  -3   8  14   29.09   11.50
   3  -8 -14   32.37   12.00
   3   8 -13   32.75   15.61
   3   8 -13   37.48    4.93
   3   8 -13   30.35    5.25
  -3   8  13   29.80    7.68
   3  -8 -13   55.19    8.11
   3   8 -12   53.39   10.79
   3   8 -12   57.65    7.41
   3   8 -12   57.97    5.74
  -3   8  12   53.24   11.96
   3  -8 -12   56.20    8.04
   3   8 -11   23.18   13.79
   3   8 -11   13.60    3.85
   3   8 -11    6.14    7.51
  -3   8  11    5.72    6.40
   3  -8 -11   22.93   10.53
   3   8 -10  263.16   17.43
   3   8 -10  254.11    8.66
   3   8 -10  250.64   13.76
  -3   8  10  248.38   12.61
   3  -8 -10  261.05   13.20
   3   8  -9   23.94   12.93
  -3   8   9    9.28    5.87
   3   8  -9    6.43    5.13
   3   8  -9    4.74    7.14
   3  -8  -9    8.62    9.76
   3   8  -8   38.88    5.44
   3   8  -8   28.99    9.20
  -3   8   8   50.34    6.21
   3   8  -8   36.63    5.15
   3  -8  -8   45.58    7.24
   3  -8  -8   29.96    6.57
   3   8  -7    4.38    3.07
   3   8  -7    2.03    8.11
  -3   8   7    3.47    8.23
   3   8  -7    2.78    4.61
   3  -8  -7    1.08    5.61
   3  -8  -7    2.29    5.70
   3   8  -6   23.66    3.32
   3   8  -6   39.13   13.33
  -3   8   6   16.34    5.83
   3   8  -6   24.65    5.20
   3  -8  -6   20.73    5.62
   3  -8  -6   23.92    6.22
   3   8  -5   22.45    3.25
   3   8  -5   26.65    8.52
  -3   8   5   19.13    5.53
   3  -8  -5    9.91    9.10
   3  -8  -5   19.48    4.92
   3   8  -4   47.89    8.79
  -3   8   4   29.76    8.34
   3   8  -4   30.09    3.56
   3  -8  -4   34.81    4.39
  -3  -8   4   20.14    7.14
   3  -8  -4   24.93    6.47
   3   8  -3   28.66    8.95
  -3   8   3   28.85    5.43
   3   8  -3   31.43    5.16
   3  -8  -3   25.97    5.29
  -3  -8   3   35.69    7.57
   3  -8  -3   16.88    6.76
   3   8  -2  412.08   22.78
   3   8  -2  449.91   15.21
  -3   8   2  442.73   16.47
   3  -8  -2  417.36   11.12
  -3  -8   2  407.23   20.05
  -3  -8   2  389.90   12.82
   3   8  -1   44.76    3.95
  -3   8   1   41.36    9.72
  -3  -8   1   41.02    4.64
   3   8   0  569.25   32.39
   3   8   0  640.28   19.27
  -3   8   0  635.78   23.64
  -3  -8   0  556.15   37.35
  -3  -8   0  590.34   19.32
   3   8   1   26.09    3.89
  -3   8  -1   25.66    5.93
  -3  -8  -1   18.61    9.07
  -3  -8  -1   23.79    4.10
   3   8   2  432.01   16.63
  -3   8  -2  420.31   20.88
  -3  -8  -2  421.85   22.87
  -3  -8  -2  423.44   17.23
   3   8   3    7.28    4.03
  -3   8  -3    2.48    5.23
  -3  -8  -3    5.33    9.13
  -3  -8  -3   12.02    6.41
   3   8   4  376.26   15.63
  -3   8  -4  335.52    8.88
  -3   8  -4  350.36   14.81
  -3   8  -4  383.17   19.79
  -3  -8  -4  339.29   12.65
   3   8   5   54.57    5.32
  -3   8  -5   56.37    5.35
  -3   8  -5   70.99   14.57
  -3   8  -5   41.51    6.86
  -3  -8  -5   41.19    5.25
  -3  -8  -5   58.00   11.15
   3   8   6    1.00    4.55
  -3   8  -6   -1.03    5.08
  -3   8  -6    4.49    5.83
  -3   8  -6   -0.81    8.12
  -3  -8  -6    4.44   10.15
  -3  -8  -6    5.16    4.48
   3   8   7    4.31    4.86
  -3   8  -7    5.73    3.84
  -3   8  -7    5.21    6.16
  -3   8  -7    8.83    7.98
  -3  -8  -7    6.14   10.94
  -3  -8  -7    0.67    4.92
   3   8   8   62.29    9.54
  -3   8  -8   55.16    7.57
  -3   8  -8   56.18    7.71
  -3   8  -8   51.88   13.90
  -3  -8  -8   57.00   13.09
  -3  -8  -8   54.19    6.14
   3   8   9    4.19    5.49
  -3   8  -9   -4.38    8.07
  -3   8  -9    4.86    6.60
  -3   8  -9    4.82    6.62
  -3  -8  -9   11.51   11.69
   3   8  10   87.94   11.37
  -3   8 -10   84.09   10.63
  -3   8 -10   86.79   10.19
  -3  -8 -10   76.41    7.66
  -3  -8 -10   96.25   23.73
   3   8  11   13.72    6.59
  -3   8 -11   14.83   13.04
  -3   8 -11   13.97    5.80
  -3  -8 -11   17.97    6.41
  -3  -8 -11   23.37   13.41
   3   8  12  201.98   12.76
  -3   8 -12  217.27   16.06
  -3   8 -12  226.54   11.35
  -3  -8 -12  213.94   12.24
  -3  -8 -12  224.47   23.45
   3   8  13   -2.72    7.35
  -3   8 -13    1.79    8.83
  -3  -8 -13   -7.22   22.44
  -3  -8 -13   -0.03    9.98
   3   8  14   24.51    8.38
  -3   8 -14   18.62    9.72
  -3  -8 -14   18.23   16.50
  -3  -8 -14   26.18    7.68
   3   8  15    7.43   12.65
  -3   8 -15   16.47    9.37
  -3  -8 -15    0.91   16.72
  -3  -8 -15    3.09    7.57
   3   8  16    2.91    8.80
  -3   8 -16    8.17   14.68
  -3  -8 -16   19.68   17.40
  -3  -8 -16    9.94    7.99
   3   8  17   -0.61    9.39
  -3   8 -17    5.36    9.70
  -3  -8 -17  -13.00   18.42
  -3  -8 -17   -6.02    8.47
   3   8  18   46.26   16.90
  -3   8 -18   45.83   17.33
  -3  -8 -18   39.53   21.34
  -3  -8 -18   28.65    9.91
   3   8  19    5.51   10.99
  -3   8 -19   -5.09   10.74
  -3  -8 -19    4.05    9.31
   3   8  20   98.06   16.05
  -3   8 -20  149.07   22.11
  -3  -8 -20  112.02   13.70
   3   8  21    9.04   12.51
  -3   8 -21   13.97   11.12
  -3  -8 -21  -11.67   10.84
   3   9 -22   12.88    7.69
  -3   9  22    5.63   11.90
   3  -9 -22   -0.07   11.53
   3   9 -21  121.03   19.45
   3   9 -21  100.05   14.56
  -3   9  21   93.26   21.88
   3  -9 -21  115.83   14.84
   3   9 -20   12.17   21.46
   3   9 -20    5.05    7.33
  -3   9  20   11.93   10.11
   3  -9 -20   12.12   10.48
   3   9 -19   25.42   14.34
   3   9 -19   18.02   11.03
  -3   9  19   19.34   10.67
   3  -9 -19   34.29   10.59
   3   9 -18   11.46   13.44
   3   9 -18   12.60    6.59
   3   9 -18   19.03    6.64
  -3   9  18   16.49    9.79
   3  -9 -18   24.00   15.29
   3   9 -17   27.80   12.72
   3   9 -17   24.68    9.49
   3   9 -17   12.96   10.36
  -3   9  17    9.03    9.66
   3  -9 -17   15.08   10.08
   3   9 -16   64.56   19.64
   3   9 -16   34.36    6.26
   3   9 -16   39.39    7.03
  -3   9  16   75.47    9.84
   3  -9 -16   44.18   10.10
   3   9 -15   11.78   11.35
   3   9 -15    7.45    5.20
   3   9 -15    3.48    6.05
  -3   9  15    9.10    8.12
   3  -9 -15   -0.47    8.42
   3   9 -14    2.07   10.92
   3   9 -14    2.97    7.40
   3   9 -14    3.60    5.76
  -3   9  14   17.00   11.95
   3  -9 -14    7.24    8.18
   3   9 -13   71.16   18.94
   3   9 -13   60.08    5.64
   3   9 -13   57.02    9.73
  -3   9  13   60.15    9.09
   3  -9 -13   57.67    9.14
   3   9 -12   30.36   11.15
   3   9 -12   23.60    4.69
   3   9 -12   26.83    6.07
  -3   9  12   33.48   11.95
   3  -9 -12   32.58    8.39
   3   9 -11   90.34   19.24
   3   9 -11   79.80    8.23
   3   9 -11   74.45    7.27
  -3   9  11   91.70    9.41
   3  -9 -11   91.89   11.90
   3  -9 -11  101.87    9.50
   3   9 -10    1.34    3.84
   3   9 -10    4.00   10.04
  -3   9  10    5.73    6.62
   3   9 -10    5.08    5.40
   3  -9 -10    2.67    8.34
   3  -9 -10   -5.13    7.21
   3   9  -9   36.72    4.37
   3   9  -9   58.13   16.85
  -3   9   9   55.68    7.30
   3   9  -9   36.83    6.05
   3  -9  -9   45.35    8.67
   3  -9  -9   35.97    7.62
   3   9  -8   15.47    5.95
   3   9  -8    5.20    9.90
  -3   9   8   11.39    6.64
   3   9  -8   18.09    5.61
   3  -9  -8   30.73   11.42
   3  -9  -8   39.66   10.90
   3   9  -7    9.23    3.78
   3   9  -7    7.63    9.25
  -3   9   7   21.48    6.12
   3   9  -7    1.81    5.64
   3  -9  -7    7.95    9.70
   3  -9  -7    5.70    6.90
   3   9  -6   34.22   15.12
   3   9  -6   32.14    6.21
  -3   9   6   22.89    6.42
   3   9  -6   26.14    3.96
   3  -9  -6   35.20    9.25
   3  -9  -6   28.08   10.85
   3   9  -5   35.14    9.63
  -3   9   5   17.14    9.69
   3   9  -5   16.23    5.81
   3  -9  -5   20.57    7.21
   3  -9  -5   16.70    5.26
   3   9  -4  129.10   13.58
  -3   9   4  142.89    9.26
   3   9  -4  147.05    8.96
   3  -9  -4  123.41   14.64
   3  -9  -4  135.26    9.86
   3   9  -3  100.72   12.30
  -3   9   3   93.30    7.91
   3   9  -3   97.69    5.35
   3  -9  -3   89.71    9.17
   3  -9  -3   89.67    7.19
   3   9  -2   40.74   15.36
  -3   9   2    9.01    5.88
   3   9  -2   11.48    3.89
  -3  -9   2   15.00    7.93
   3  -9  -2   14.53    4.76
   3   9  -1   18.38    9.95
   3   9  -1   18.21    6.06
  -3   9   1   23.83    6.00
  -3  -9   1   18.27    8.45
  -3  -9   1   10.59    4.63
   3   9   0    7.83    3.80
  -3   9   0  -11.27    9.13
  -3  -9   0    8.31    8.19
  -3  -9   0    5.57    4.40
   3   9   1  238.75    9.30
  -3   9  -1  232.73   11.62
  -3  -9  -1  225.68   22.40
  -3  -9  -1  219.42    9.53
   3   9   2   12.92    4.42
  -3   9  -2   14.44    6.03
  -3  -9  -2   20.33   14.37
  -3  -9  -2    8.88    4.64
   3   9   3   41.87    5.15
  -3   9  -3   27.25    6.57
  -3  -9  -3   37.41   10.58
  -3  -9  -3   25.31    8.03
   3   9   4    7.21    7.13
  -3   9  -4   -4.86    9.24
  -3   9  -4   10.69    6.10
  -3  -9  -4    8.72    5.12
  -3  -9  -4    6.43   10.25
   3   9   5    6.12    4.80
  -3   9  -5   35.94   13.86
  -3   9  -5    4.12    6.03
  -3  -9  -5    3.45    7.67
  -3  -9  -5   -8.30   10.51
   3   9   6   20.69    8.02
  -3   9  -6   15.13    5.59
  -3   9  -6    8.76    9.26
  -3   9  -6    8.63    6.65
  -3  -9  -6    7.49    5.48
  -3  -9  -6   18.83   11.32
   3   9   7   27.53    5.80
  -3   9  -7   20.14    6.53
  -3   9  -7    3.72    9.17
  -3   9  -7   10.38    7.24
  -3  -9  -7    8.57    8.84
  -3  -9  -7   24.45   18.26
   3   9   8   -4.47    5.62
  -3   9  -8    3.25    6.94
  -3   9  -8    0.87    7.10
  -3   9  -8   -5.19   13.81
  -3  -9  -8    5.72   11.83
  -3  -9  -8    2.95    5.63
   3   9   9   90.33    8.36
  -3   9  -9   76.05    6.87
  -3   9  -9  100.53    9.72
  -3   9  -9  110.22   12.21
  -3  -9  -9   80.97   16.23
  -3  -9  -9   92.10   12.13
   3   9  10   11.40    6.72
  -3   9 -10    6.83    5.70
  -3   9 -10   25.84   11.81
  -3   9 -10   10.88    9.36
  -3  -9 -10   24.89   13.80
  -3  -9 -10   11.08    6.61
   3   9  11   81.40   12.81
  -3   9 -11   69.96    7.56
  -3   9 -11   58.39    9.13
  -3   9 -11   63.61   11.43
  -3  -9 -11   79.14   17.25
  -3  -9 -11   54.35    8.36
   3   9  12   -7.10    7.21
  -3   9 -12    4.22    9.58
  -3   9 -12    0.49    7.68
  -3   9 -12    8.34    9.24
  -3  -9 -12   24.92   22.64
  -3  -9 -12   -0.53    6.88
   3   9  13   27.58   12.30
  -3   9 -13   47.24   15.99
  -3   9 -13   28.63   11.51
  -3  -9 -13   36.03   12.49
  -3  -9 -13   20.16   17.41
   3   9  14   28.96    9.07
  -3   9 -14   17.32   10.29
  -3   9 -14   14.01    8.05
  -3  -9 -14   23.24    8.12
  -3  -9 -14   15.49   17.09
   3   9  15   25.63    9.21
  -3   9 -15   24.76   15.99
  -3   9 -15   19.44    8.85
  -3  -9 -15   30.74    9.00
  -3  -9 -15   21.99   18.63
   3   9  16   18.77   15.04
  -3   9 -16    3.52   10.87
  -3   9 -16   22.23   13.40
  -3  -9 -16   23.89    9.02
  -3  -9 -16   31.53   19.24
   3   9  17   14.41   10.11
  -3   9 -17    4.48   10.88
  -3  -9 -17   18.23   29.79
  -3  -9 -17   16.48    9.39
   3   9  18   -1.09   10.64
  -3   9 -18   -1.15   11.07
  -3  -9 -18   51.73   30.38
  -3  -9 -18  -11.66    9.86
   3   9  19   32.15   19.55
  -3   9 -19   56.00   12.87
  -3  -9 -19   52.81   24.50
  -3  -9 -19   47.72   11.77
   3  10 -20   30.81   25.42
   3  10 -20   37.16    8.11
   3  10 -20   27.57    8.60
  -3  10  20   31.12   12.34
   3 -10 -20   24.26   12.63
   3  10 -19   21.56   14.83
   3  10 -19    9.36    7.31
   3  10 -19    1.61    7.78
  -3  10  19   34.30   16.40
   3 -10 -19    0.97   11.02
   3  10 -18   37.22   15.46
   3  10 -18   31.71   11.38
   3  10 -18   34.54   12.04
  -3  10  18   48.89   11.22
   3 -10 -18   32.95   11.39
   3  10 -17   19.38   13.75
   3  10 -17   10.28    6.42
   3  10 -17   17.45    7.30
  -3  10  17    6.97    9.84
   3 -10 -17   17.70   16.17
   3  10 -16    8.10   19.99
   3  10 -16    6.06    5.88
   3  10 -16    9.37    7.03
  -3  10  16    2.39    9.68
   3 -10 -16   25.97   15.22
   3  10 -15   35.20   13.95
   3  10 -15   41.49    9.31
   3  10 -15   28.76   10.99
  -3  10  15   31.30   10.07
   3 -10 -15   29.94   10.49
   3  10 -14    8.40   12.15
   3  10 -14    3.67    5.22
   3  10 -14    6.40    6.47
  -3  10  14   12.32   13.49
   3 -10 -14    1.74   12.79
   3 -10 -14    5.58    9.02
   3  10 -13   87.82   14.59
   3  10 -13   68.73    9.68
   3  10 -13   72.69    8.38
  -3  10  13   74.16   10.60
   3 -10 -13   78.18   14.38
   3 -10 -13   63.31   10.87
   3  10 -12    9.70    4.93
   3  10 -12   16.58   11.71
  -3  10  12   18.52   13.09
   3  10 -12   15.34    9.90
   3 -10 -12   24.27   17.07
   3 -10 -12   20.57    8.85
   3  10 -11   31.43    7.92
   3  10 -11   33.95   12.58
  -3  10  11   45.04    8.49
   3  10 -11   34.04   10.60
   3 -10 -11   34.83   11.17
   3 -10 -11   19.57    9.12
   3  10 -10  111.16    7.00
   3  10 -10  133.14   15.33
  -3  10  10  134.05   15.51
   3  10 -10  106.64   12.24
   3 -10 -10  105.66   12.96
   3 -10 -10  102.90   10.72
   3  10  -9    3.61    4.40
   3  10  -9   14.36   10.96
  -3  10   9   13.17    7.27
   3  10  -9    2.65    6.15
   3 -10  -9   11.82   12.94
   3 -10  -9   12.95    8.05
   3  10  -8   29.07    7.37
   3  10  -8   33.18   11.30
  -3  10   8   33.36   11.70
   3  10  -8   33.54    6.74
   3 -10  -8   27.33    8.34
   3 -10  -8   18.06    8.52
   3  10  -7   39.18   11.81
   3  10  -7   49.63    7.61
  -3  10   7   37.65    7.95
   3  10  -7   49.08    5.17
   3 -10  -7   40.69    8.03
   3 -10  -7   48.52   13.64
   3  10  -6   34.09   16.79
   3  10  -6    8.06    6.71
  -3  10   6    9.75    6.99
   3  10  -6    9.84    6.78
   3 -10  -6   11.71    9.61
   3 -10  -6   11.48    8.10
   3  10  -5   43.55   11.80
  -3  10   5   44.01    7.70
   3  10  -5   57.69    5.21
   3 -10  -5   65.31   13.60
   3 -10  -5   47.37    9.36
   3  10  -4   20.24   10.73
  -3  10   4   20.42    6.82
   3  10  -4   12.57    4.44
   3 -10  -4   10.39    7.30
   3 -10  -4    6.79    4.59
   3  10  -3   36.52   17.08
  -3  10   3    2.86    6.24
   3  10  -3   -0.58    6.58
  -3 -10   3    9.55    8.18
   3 -10  -3    5.57    6.18
   3  10  -2   86.86   12.50
   3  10  -2   75.82    5.60
  -3  10   2   58.83    8.08
  -3 -10   2   58.11   10.57
   3  10  -1   19.77    4.79
  -3  10   1   29.71   10.69
  -3 -10   1  -11.16   15.53
   3  10   0   72.61    6.06
  -3  10   0   90.02    8.35
  -3 -10   0   52.15   11.75
  -3 -10   0   72.74    6.83
   3  10   1   15.96    4.87
  -3  10  -1    4.07   10.26
  -3 -10  -1   18.13    9.76
  -3 -10  -1   16.02    5.60
   3  10   2   14.83    8.01
  -3  10  -2   19.72    7.06
  -3 -10  -2   12.06   10.50
  -3 -10  -2   13.95    5.62
   3  10   3   12.79    5.35
  -3  10  -3   20.02   10.63
  -3 -10  -3   28.42   16.28
  -3 -10  -3   25.24    8.94
   3  10   4    9.53    8.10
  -3  10  -4   11.67   10.76
  -3  10  -4   -5.15    6.72
  -3 -10  -4   -3.37    5.51
  -3 -10  -4    8.70   10.99
   3  10   5   63.04    6.83
  -3  10  -5   56.12   18.13
  -3  10  -5   61.07   12.12
  -3 -10  -5   54.05   10.43
  -3 -10  -5   38.29   20.22
   3  10   6   30.52    6.25
  -3  10  -6   36.44   11.24
  -3  10  -6   29.37    7.80
  -3 -10  -6   25.37    6.70
  -3 -10  -6    5.10   12.90
   3  10   7  108.64    8.91
  -3  10  -7  113.87    6.43
  -3  10  -7  120.77   14.26
  -3  10  -7  134.04   10.26
  -3 -10  -7  115.86   13.50
  -3 -10  -7  115.11   25.06
   3  10   8   85.15    8.53
  -3  10  -8   93.85    9.29
  -3  10  -8   99.28   13.58
  -3  10  -8   97.38    9.56
  -3 -10  -8   73.72    8.88
  -3 -10  -8   49.65   16.69
   3  10   9   29.02   10.62
  -3  10  -9   11.62    8.34
  -3  10  -9    6.41   10.17
  -3  10  -9   16.73    7.80
  -3 -10  -9    1.15   10.72
  -3 -10  -9    7.33   21.45
   3  10  10   24.01    7.90
  -3  10 -10   30.01    9.75
  -3  10 -10   28.83   12.89
  -3  10 -10   33.86   16.31
  -3 -10 -10   49.36   15.92
  -3 -10 -10   29.22    7.72
   3  10  11   13.52   11.58
  -3  10 -11   13.46    9.82
  -3  10 -11   10.46    8.28
  -3  10 -11   -0.34   10.46
  -3 -10 -11   14.80   15.15
  -3 -10 -11   11.35    7.45
   3  10  12   40.06    9.04
  -3  10 -12   38.86   12.04
  -3  10 -12   32.77    9.47
  -3  10 -12   41.58   11.84
  -3 -10 -12   54.33   26.77
  -3 -10 -12   42.47    8.91
   3  10  13   12.70    8.64
  -3  10 -13   18.69    7.76
  -3  10 -13   21.30   14.28
  -3  10 -13    3.73   11.18
  -3 -10 -13    5.04   17.35
  -3 -10 -13   14.18   13.15
   3  10  14   31.58   14.93
  -3  10 -14   25.96    8.38
  -3  10 -14   20.50    9.90
  -3  10 -14   22.48   11.30
  -3 -10 -14   26.40   18.89
  -3 -10 -14   13.47    9.22
   3  10  15   32.55   10.97
  -3  10 -15   31.21   14.36
  -3  10 -15   31.60   10.54
  -3  10 -15   33.17   12.39
  -3 -10 -15   30.71   20.04
  -3 -10 -15   39.87    9.90
   3  10  16   15.90   10.28
  -3  10 -16    8.92   11.10
  -3  10 -16   -3.98   10.07
  -3 -10 -16   11.02    9.47
  -3 -10 -16    8.12   29.77
   3  10  17   10.30   17.16
  -3  10 -17   20.19   18.77
  -3  10 -17    9.95   10.93
  -3 -10 -17   27.44   10.41
  -3 -10 -17   27.66   21.37
   3  11 -18   14.01    8.11
   3  11 -18   14.85   10.90
  -3  11  18   11.99   11.80
   3 -11 -18   14.52   12.06
   3 -11 -18   17.93   17.78
   3  11 -17   10.23   22.90
   3  11 -17   17.16    6.86
   3  11 -17    0.75   11.68
  -3  11  17   18.00   11.14
   3 -11 -17   29.58   16.68
   3 -11 -17   11.88   11.74
   3  11 -16   64.40   17.63
   3  11 -16   68.34   11.98
   3  11 -16   66.29    9.42
  -3  11  16   76.04   12.47
   3 -11 -16   65.88   26.98
   3 -11 -16   63.23   13.38
   3  11 -15    9.76    6.23
   3  11 -15   10.24   13.97
  -3  11  15  -16.44   10.17
   3  11 -15    9.68   11.32
   3 -11 -15   10.89   14.30
   3 -11 -15   17.29   15.65
   3  11 -14   47.50    6.84
   3  11 -14   30.53   23.25
  -3  11  14   68.19   16.28
   3  11 -14   43.58   12.92
   3 -11 -14   48.21   15.41
   3 -11 -14   45.49   11.47
   3  11 -13    6.49    8.78
   3  11 -13    8.40   12.97
  -3  11  13    8.10    9.15
   3  11 -13   -2.44    7.09
   3 -11 -13   10.30   19.28
   3 -11 -13    4.47   10.03
   3  11 -12   45.97    6.50
   3  11 -12   44.17   14.46
  -3  11  12   46.02   15.76
   3  11 -12   40.09    8.25
   3 -11 -12   42.09   13.10
   3 -11 -12   45.53   10.89
   3  11 -11    4.40    8.11
   3  11 -11   13.24   12.83
  -3  11  11    8.25    8.78
   3  11 -11   13.60   11.47
   3 -11 -11    0.04   16.69
   3 -11 -11   -6.76    9.17
   3  11 -10    0.36    5.16
   3  11 -10   10.25   12.10
  -3  11  10    1.29   12.76
   3  11 -10    7.14   10.69
   3 -11 -10    7.76    9.81
   3 -11 -10   -0.63    9.31
   3  11  -9   31.85   13.47
   3  11  -9   38.82    8.03
  -3  11   9   45.07    9.22
   3  11  -9   45.33    8.75
   3 -11  -9   25.88   10.00
   3 -11  -9   38.40   10.01
   3  11  -8   48.19   20.94
   3  11  -8   54.27    8.95
  -3  11   8   61.36   13.88
   3  11  -8   41.20    6.04
   3 -11  -8   41.42    9.28
   3 -11  -8   49.35   10.31
   3  11  -7   41.62   12.92
   3  11  -7   42.84    8.61
  -3  11   7   32.86    8.69
   3  11  -7   27.39    5.79
   3 -11  -7   33.51    8.23
   3 -11  -7   31.08    9.90
   3  11  -6   72.15   20.71
   3  11  -6   63.20    9.08
  -3  11   6   38.50    9.32
   3  11  -6   49.39    6.09
   3 -11  -6   48.79    7.56
   3 -11  -6   56.09   15.82
   3  11  -5   50.60   12.57
  -3  11   5   13.91    8.11
   3  11  -5   25.30    5.37
   3 -11  -5   13.31    9.26
   3 -11  -5   19.57    5.95
   3  11  -4  150.87   17.12
   3  11  -4  169.90   12.01
  -3  11   4  166.07   17.06
   3 -11  -4  151.60   11.82
   3  11  -3    1.25    5.08
  -3  11   3   12.44    7.32
   3 -11  -3    3.57    4.27
   3  11  -2  101.15    9.83
  -3  11   2   66.60    9.52
  -3 -11   2   84.89   12.00
   3  11  -1    3.53    5.13
  -3  11   1   12.50    7.23
  -3 -11   1   15.91    9.82
   3  11   0    5.34    8.17
  -3  11   0    7.26    7.05
  -3 -11   0   -1.02   15.89
   3  11   1   46.32    6.65
  -3  11  -1   58.53    8.66
  -3 -11  -1   44.41   11.90
  -3 -11  -1   47.58    7.37
   3  11   2   25.46    9.32
  -3  11  -2    9.38    7.84
  -3 -11  -2   20.88   11.02
  -3 -11  -2   19.02    6.66
   3  11   3   22.61    6.30
  -3  11  -3   12.45    8.26
  -3 -11  -3   47.30   18.05
  -3 -11  -3   30.78   10.30
   3  11   4  100.55   12.51
  -3  11  -4  119.10   15.85
  -3  11  -4  126.07   10.50
  -3 -11  -4  102.21    9.66
  -3 -11  -4  118.63   16.14
   3  11   5   28.25    6.63
  -3  11  -5    8.50   18.43
  -3  11  -5   14.22    8.32
  -3 -11  -5    9.84    7.02
  -3 -11  -5   13.02   12.87
   3  11   6  169.58   10.90
  -3  11  -6  182.19   18.11
  -3  11  -6  158.61   12.91
  -3 -11  -6  159.19   11.63
  -3 -11  -6  174.64   19.62
   3  11   7   55.37    8.15
  -3  11  -7   43.42   12.87
  -3  11  -7   36.32   13.77
  -3 -11  -7   52.93    8.25
  -3 -11  -7   51.97   15.85
   3  11   8   35.63    8.26
  -3  11  -8   38.61   13.15
  -3  11  -8   51.93    9.17
  -3 -11  -8   38.24    8.42
  -3 -11  -8   56.14   15.93
   3  11   9   22.28   12.16
  -3  11  -9   30.36   12.22
  -3  11  -9   26.00    8.78
  -3 -11  -9   29.63   12.62
  -3 -11  -9   41.97   16.23
   3  11  10   13.37    7.95
  -3  11 -10   -5.08   17.94
  -3  11 -10   -3.76   13.16
  -3 -11 -10    2.93    7.90
  -3 -11 -10   18.71   15.24
   3  11  11    3.02    8.17
  -3  11 -11    3.57   11.25
  -3  11 -11    4.27    8.63
  -3 -11 -11    7.55    8.18
  -3 -11 -11   19.76   24.29
   3  11  12   14.23    9.11
  -3  11 -12   17.84   17.61
  -3  11 -12    6.20    9.31
  -3 -11 -12   22.18    8.97
  -3 -11 -12   17.62   17.74
   3  11  13    4.53    9.24
  -3  11 -13  -16.10   11.66
  -3  11 -13   -3.32   13.89
  -3 -11 -13    7.00   13.58
  -3 -11 -13    5.38   17.73
   3  11  14   63.20   17.32
  -3  11 -14   71.75   14.14
  -3  11 -14   60.67   11.94
  -3 -11 -14   58.36   11.45
  -3 -11 -14   67.76   21.92
   3  11  15   34.39   11.38
  -3  11 -15   15.21   12.48
  -3  11 -15   17.73   10.89
  -3 -11 -15   16.18   10.19
  -3 -11 -15   11.61   31.22
   3  12 -15   54.90    8.28
   3  12 -15   53.91   17.85
  -3  12  15   55.75   12.22
   3  12 -15   61.44   10.04
   3 -12 -15   38.43   16.96
   3 -12 -15   40.30   12.89
   3  12 -14   -0.14    6.49
   3  12 -14   20.39   23.63
  -3  12  14   10.80   16.16
   3  12 -14    6.54   12.09
   3 -12 -14   13.12   21.86
   3 -12 -14    2.14   16.94
   3  12 -13   64.11    7.76
   3  12 -13   44.63   17.32
  -3  12  13   69.02   12.21
   3  12 -13   60.19    9.87
   3 -12 -13   60.93   15.62
   3 -12 -13   73.91   13.31
   3  12 -12    6.70    6.27
   3  12 -12   12.79   21.93
  -3  12  12   10.28    9.96
   3  12 -12    9.27    8.06
   3 -12 -12   22.53   18.61
   3 -12 -12    5.52   10.87
   3  12 -11    4.87   14.06
   3  12 -11   11.27   12.80
  -3  12  11    2.90    9.74
   3  12 -11   12.77    9.27
   3 -12 -11    5.21   11.31
   3 -12 -11    9.52   10.43
   3  12 -10   14.47   21.27
   3  12 -10   16.17   12.46
  -3  12  10    2.38    9.45
   3  12 -10    5.43    5.86
   3 -12 -10   -0.64   15.70
   3 -12 -10   16.59   16.69
   3  12  -9   13.91   14.41
   3  12  -9   17.84    8.52
  -3  12   9   19.06    9.33
   3  12  -9   18.08    9.41
   3 -12  -9   15.75   15.05
   3 -12  -9    9.73   10.64
   3  12  -8   14.12   20.67
   3  12  -8    1.86    8.68
  -3  12   8    8.57    8.72
   3  12  -8    0.98    5.81
   3 -12  -8    3.53   12.98
   3 -12  -8   16.39    9.90
   3  12  -7   83.18   16.36
   3  12  -7   66.29   10.93
  -3  12   7   67.73   15.85
   3  12  -7   76.41   10.84
   3 -12  -7   54.55   13.58
   3 -12  -7   84.49   12.64
   3  12  -6    7.31   14.27
  -3  12   6   10.70    8.76
   3  12  -6    2.48    5.76
   3 -12  -6    9.02   10.22
   3 -12  -6   16.43   10.16
   3  12  -5  108.00   16.47
  -3  12   5  107.44   16.26
   3  12  -5  102.19   11.46
   3  12  -5  113.72   12.28
   3 -12  -5   71.05   11.21
   3  12  -4    9.19    5.85
  -3  12   4    7.07    8.36
   3  12  -3   92.33   11.06
  -3  12   3   71.88   15.76
   3  12  -2   14.79    5.98
  -3  12   2    4.33    8.58
   3  12  -1   39.23    9.62
  -3  12   1   30.48    8.76
  -3 -12   1   20.10   11.38
   3  12   0    1.63    5.86
  -3  12   0   -2.33    8.21
  -3 -12   0    7.69   10.57
   3  12   1   -0.62    6.17
  -3  12  -1    3.26    7.87
  -3 -12  -1   -3.70   17.17
   3  12   2   13.63    6.64
  -3  12  -2    1.82    8.50
  -3 -12  -2    5.57   11.52
  -3 -12  -2    9.36    7.30
   3  12   3   69.39    8.31
  -3  12  -3   82.32   10.23
  -3 -12  -3   76.32   14.66
  -3 -12  -3   56.50    9.30
   3  12   4   -8.26   10.18
  -3  12  -4    9.53   12.66
  -3  12  -4    2.66   12.86
  -3 -12  -4    2.69   11.68
  -3 -12  -4    5.71   18.65
   3  12   5   85.99    8.90
  -3  12  -5   66.65   15.95
  -3  12  -5   71.81   10.73
  -3 -12  -5   76.48    9.74
  -3 -12  -5   70.82   15.96
   3  12   6   -4.26   10.96
  -3  12  -6    5.93   12.40
  -3  12  -6    6.13    8.35
  -3 -12  -6   -3.54    7.87
  -3 -12  -6    2.46   20.40
   3  12   7   72.51    9.51
  -3  12  -7   66.78   15.06
  -3  12  -7   82.89   16.09
  -3 -12  -7   52.05    9.72
  -3 -12  -7   67.32   17.10
   3  12   8   25.35    8.19
  -3  12  -8   41.85   19.93
  -3  12  -8    4.58    9.12
  -3 -12  -8   10.56    8.55
  -3 -12  -8   17.90   23.27
   3  12   9   23.01   13.57
  -3  12  -9    0.61   13.37
  -3  12  -9   27.94    9.53
  -3 -12  -9   21.96   13.64
  -3 -12  -9   21.17   17.06
   3  12  10   19.48    9.10
  -3  12 -10   28.39   19.90
  -3  12 -10    3.05    9.28
  -3 -12 -10   18.16    9.35
  -3 -12 -10   13.84   16.77
   3  12  11   12.21    8.80
  -3  12 -11   -0.98   12.35
  -3  12 -11    2.79    9.24
  -3 -12 -11   -1.49    9.31
  -3 -12 -11  -14.29   26.40
   3  12  12   10.83    9.67
  -3  12 -12   17.83   19.24
  -3  12 -12    1.57    9.40
  -3 -12 -12   12.10   14.61
  -3 -12 -12   -5.21   17.94
   3  13 -11   12.03   10.66
   3 -13 -11    7.74   12.32
   3  13 -10   10.98   23.57
  -3  13  10    2.74   10.16
   3  13 -10    1.89    6.60
   3  13 -10    3.23    9.14
   3 -13 -10    8.79   11.68
   3  13  -9    5.38   15.70
  -3  13   9   25.02   16.08
   3  13  -9   15.47    6.82
   3  13  -9   12.08    9.86
   3 -13  -9   21.66   18.38
   3  13  -8   19.31   23.47
  -3  13   8    7.03   10.26
   3  13  -8   21.60    6.92
   3  13  -8   20.13    9.91
   3 -13  -8   17.46   11.51
   3  13  -7   11.58   14.60
  -3  13   7   -5.17    9.71
   3  13  -7    5.82    6.46
   3  13  -7    1.96   14.97
   3 -13  -7    5.25   11.22
   3  13  -6   26.66   10.58
   3  13  -6   28.65   10.80
  -3  13   6   31.28   10.20
   3  13  -5    9.08    6.53
   3  13  -5    5.17   10.45
  -3  13   5    2.96    9.60
   3  13  -4   36.91   11.08
  -3  13   4   43.99   15.68
   3  13  -3   14.16    6.86
  -3  13   3    9.54    9.30
   3  13  -2   27.18    7.08
  -3  13   2    8.40   14.46
   3  13  -1    4.58    6.63
  -3  13   1    2.43    9.14
   3  13   0    2.84    6.74
  -3  13   0    9.61    9.18
  -3 -13   0    1.36   11.33
   3  13   1   29.73   11.43
  -3  13  -1   16.25   14.18
  -3 -13  -1    8.12   13.00
   3  13   2    5.09    7.15
  -3  13  -2   -3.91    9.12
  -3 -13  -2    6.54   19.72
   3  13   3   14.14   11.75
  -3  13  -3   12.15   14.53
  -3  13  -3    9.99   14.35
  -3 -13  -3    9.15    8.71
  -3 -13  -3   20.21   13.09
   3  13   4   39.10    8.46
  -3  13  -4   25.49   24.56
  -3  13  -4   35.16   10.18
  -3 -13  -4   28.48   14.42
  -3 -13  -4   58.03   22.91
   3  13   5    2.31    7.78
  -3  13  -5    0.53   14.21
  -3  13  -5   10.59    9.10
  -3 -13  -5    6.07    8.88
  -3 -13  -5   -5.86   14.25
   3  13   6   80.60   15.49
  -3  13  -6   70.09   26.44
  -3  13  -6   71.89   17.17
  -3 -13  -6   84.79   17.42
  -3 -13  -6   97.27   27.44
   3  13   7   17.21    8.41
  -3  13  -7    9.22   13.85
  -3  13  -7    8.43    9.57
  -3 -13  -7   -0.42    9.36
  -3 -13  -7   12.49   15.70
   3  13   8   23.45    9.55
  -3  13  -8   46.65   22.44
  -3  13  -8   31.35   10.53
  -3 -13  -8   15.90   10.40
  -3 -13  -8   41.11   26.72
   4   0 -28   71.87   15.59
  -4   0  28   49.32   13.35
   4   0 -27   11.80   12.59
  -4   0  27   11.12   16.05
   4   0 -26   36.34    8.86
  -4   0  26   42.28   10.55
   4   0 -25   -0.36    6.84
  -4   0  25    7.82    8.85
   4   0 -24   37.50    7.34
  -4   0  24   10.19   13.88
   4   0 -23   11.30    6.19
  -4   0  23    3.33    7.63
   4   0 -22   31.87    6.21
  -4   0  22   23.44    7.75
   4   0 -21   -2.80    5.32
  -4   0  21    0.52    6.41
   4   0 -20   48.81    5.81
  -4   0  20   57.70   10.33
   4   0 -19    4.29    4.50
  -4   0  19    5.85    5.31
   4   0 -18    0.01    4.22
  -4   0  18    3.03    4.76
   4   0 -17    5.40    3.89
  -4   0  17    5.07    4.51
   4   0 -16  500.98   15.99
  -4   0  16  530.14   17.71
   4   0 -15   -1.72    3.21
  -4   0  15    5.45    5.56
   4   0 -14  214.37    6.98
  -4   0  14  212.86    7.43
   4   0 -13   -1.66    2.70
  -4   0  13    1.93    4.43
   4   0 -12   18.88    3.95
  -4   0  12   17.14    2.92
   4   0 -11   -0.02    2.14
  -4   0  11   -1.51    2.34
   4   0 -10   40.87    3.54
  -4   0  10   39.66    3.74
   4   0  -9   -0.44    1.76
  -4   0   9   -0.56    2.82
   4   0  -8 1194.29   33.27
  -4   0   8 1308.22   37.27
   4   0  -7    1.12    2.20
  -4   0   7   -1.85    1.43
   4   0  -6 1328.01   37.09
  -4   0   6 1336.91   35.52
   4   0  -5   -1.01    1.85
  -4   0   5    0.25    1.16
   4   0  -4  488.92   13.87
   4   0  -4  473.59    9.06
  -4   0   4  474.30    8.63
   4   0  -3    2.67    4.78
  -4   0   3    0.61    1.75
   4   0  -2 2330.93  108.97
  -4   0   2 2383.90  108.73
  -4   0   2 2398.48   93.35
   4   0  -1   -2.91    5.32
  -4   0   1   17.05    4.99
  -4   0   1    1.74    1.93
   4   0   0   28.51    3.92
   4   0   0   24.03    2.65
  -4   0   0   24.05    5.88
  -4   0   0   26.50    2.30
   4   0   1   -1.41    3.93
   4   0   1    4.60    2.46
  -4   0  -1    5.26    5.56
  -4   0  -1    1.29    2.21
   4   0   2  207.28    6.14
  -4   0  -2  212.64    8.05
  -4   0  -2  196.96    5.74
   4   0   3   -0.99    2.91
  -4   0  -3   -6.24    6.46
  -4   0  -3    5.97    2.68
   4   0   4 3891.60  242.88
  -4   0  -4 3976.00  233.76
   4   0   5   -1.69    3.49
  -4   0  -5    1.44    2.96
   4   0   6  216.63    8.18
  -4   0  -6  238.73    7.85
   4   0   7    2.39    5.98
  -4   0  -7   -0.47    3.55
   4   0   8  931.68   32.63
  -4   0  -8  895.75   30.22
   4   0   9    1.31    4.54
  -4   0  -9    2.63    4.11
   4   0  10   29.29    5.66
  -4   0 -10   38.19    4.94
   4   0  11    2.92    5.37
  -4   0 -11    0.41    7.67
   4   0  12   97.61    8.13
  -4   0 -12   90.32    6.84
   4   0  13    0.67    6.45
  -4   0 -13    4.27    5.20
   4   0  14  339.96   17.10
  -4   0 -14  365.89   19.77
   4   0  15   -1.36    7.46
  -4   0 -15    1.11    5.92
   4   0  16  437.89   23.43
  -4   0 -16  470.63   21.06
   4   0  17    6.30    8.64
  -4   0 -17    0.42    7.23
   4   0  18   46.21   10.59
  -4   0 -18   57.17    8.75
   4   0  19   -6.91   14.66
  -4   0 -19    1.67    7.54
   4   0  20   -0.66   16.24
  -4   0 -20    0.02    8.09
   4   0  21   16.80   11.33
  -4   0 -21   -9.86   13.23
   4   0  22  109.65   16.44
  -4   0 -22  104.97   12.76
   4   0  23    3.65   12.52
  -4   0 -23   17.12   10.18
   4   0  24  104.16   18.03
  -4   0 -24  101.11   13.58
   4   0  25   12.08   14.78
  -4   0 -25   19.09   17.17
   4   1 -28   19.48    8.57
  -4   1  28   -1.99   11.36
   4  -1 -28   14.00    9.10
  -4  -1  28    7.95   11.36
   4   1 -27  152.04   12.66
  -4   1  27  117.14   22.74
   4  -1 -27  143.71   13.06
  -4  -1  27  158.06   22.98
   4   1 -26   -0.66    7.54
  -4   1  26   10.81    9.90
   4  -1 -26    8.81    8.04
  -4  -1  26   14.87    9.56
   4   1 -25   46.02   11.91
  -4   1  25   42.11   10.10
   4  -1 -25   48.61    8.54
  -4  -1  25   31.70    9.87
   4   1 -24   13.23   10.39
  -4   1  24   21.06   13.51
   4  -1 -24   18.85    7.15
  -4  -1  24   25.43    8.72
   4   1 -23   39.96    6.59
  -4   1  23   28.23    8.33
   4  -1 -23   26.42    7.03
  -4  -1  23   37.57   12.97
   4   1 -22   20.32    5.95
  -4   1  22   26.73    7.75
   4  -1 -22   13.13    6.53
  -4  -1  22   29.79    7.44
   4   1 -21   26.75    5.58
  -4   1  21   22.75   10.80
   4  -1 -21   18.17    5.88
  -4  -1  21   20.63    6.95
   4   1 -20   47.58    5.72
  -4   1  20   51.08    7.22
   4  -1 -20   40.51    9.36
  -4  -1  20   53.02    6.94
   4   1 -19  168.38    8.02
  -4   1  19  158.09    9.88
   4  -1 -19  158.55    8.46
  -4  -1  19  170.03   12.73
   4   1 -18   40.37    4.75
  -4   1  18   42.70    8.78
   4  -1 -18   50.64    5.40
  -4  -1  18   45.16    5.91
   4   1 -17   74.61    5.02
  -4   1  17   87.78    6.31
   4  -1 -17   74.92    5.63
  -4  -1  17   70.73    5.93
   4   1 -16   67.95    6.36
  -4   1  16   58.84    7.89
   4  -1 -16   64.65    5.02
  -4  -1  16   67.64    7.81
   4   1 -15  479.02   13.59
  -4   1  15  449.94   15.08
   4  -1 -15  450.25   14.27
  -4  -1  15  457.74   14.45
   4   1 -14   52.13    3.70
  -4   1  14   48.52    6.36
   4  -1 -14   50.75    4.17
  -4  -1  14   60.20    4.26
   4   1 -13  227.52    6.53
  -4   1  13  235.38    7.70
   4  -1 -13  207.77    9.11
  -4  -1  13  240.65    9.13
   4   1 -12   87.27    3.44
  -4   1  12   90.37    4.30
   4  -1 -12   85.92    4.24
  -4  -1  12   85.00    3.85
   4   1 -11    6.42    2.98
  -4   1  11    1.47    2.60
   4  -1 -11    4.51    2.58
  -4  -1  11    2.31    2.27
   4   1 -10  249.85    5.63
  -4   1  10  264.93    8.45
   4  -1 -10  249.30    6.77
  -4  -1  10  266.08    7.25
   4   1  -9  347.71    7.94
  -4   1   9  354.16    9.83
   4  -1  -9  353.25   10.04
  -4  -1   9  322.40    6.97
   4   1  -8   11.43    2.01
  -4   1   8    9.21    2.14
   4  -1  -8   12.04    3.22
  -4  -1   8   11.00    1.50
   4   1  -7 3474.54  154.18
  -4   1   7 3266.75  161.55
   4  -1  -7 3361.95  166.61
  -4  -1   7 3362.53  150.95
   4   1  -6   12.12    1.39
  -4   1   6   14.56    1.90
   4  -1  -6   14.49    1.92
  -4  -1   6   15.64    1.39
   4   1  -5   64.14    7.63
   4   1  -5   64.92    1.32
  -4   1   5   66.73    3.34
   4  -1  -5   66.04    3.62
  -4  -1   5   68.02    1.26
   4   1  -4    8.08    3.92
  -4   1   4    8.16    1.75
   4  -1  -4   12.68    2.73
   4   1  -3  288.30   13.14
  -4   1   3  303.09    6.26
  -4  -1   3  304.38    9.96
  -4  -1   3  280.95    4.39
   4  -1  -3  292.03    9.38
  -4  -1   3  297.64    4.65
   4   1  -2  778.17   25.78
  -4   1   2  789.73   18.80
   4  -1  -2  806.08   21.42
  -4  -1   2  778.14   28.10
  -4  -1   2  757.36   15.96
   4   1  -1  336.01   11.50
  -4   1   1  331.58    8.05
   4   1  -1  323.69    7.51
  -4  -1   1  319.01   10.87
   4  -1  -1  343.14   10.90
  -4  -1   1  326.97    5.97
   4   1   0  393.51   13.33
  -4   1   0  369.58    9.73
   4   1   0  363.10    8.83
  -4   1   0  407.07   10.50
   4  -1   0  346.48   11.74
  -4  -1   0  399.43    7.79
  -4  -1   0  390.41   12.94
   4   1   1    7.46    4.62
   4   1   1    7.91    1.93
  -4   1  -1   14.64    4.64
  -4   1  -1    0.86    4.42
  -4  -1  -1    4.60    1.75
  -4  -1  -1   12.27    6.62
   4   1   2   49.96    2.87
  -4   1  -2   41.73    3.52
  -4   1  -2   44.40    5.75
   4  -1   2   54.09    6.08
  -4  -1  -2   50.84    2.65
  -4  -1  -2   46.76    5.54
   4   1   3  567.69   16.77
  -4   1  -3  587.83   17.23
  -4   1  -3  566.65   15.95
   4  -1   3  560.11   19.81
  -4  -1  -3  571.86   20.69
  -4  -1  -3  517.71   13.23
   4   1   4  384.03   10.31
  -4   1  -4  389.24   11.10
  -4  -1  -4  357.62   14.65
  -4  -1  -4  351.54    9.34
   4  -1   4  382.01   12.09
   4   1   5 1042.27   33.32
  -4   1  -5 1080.72   34.97
   4  -1   5  996.28   35.35
  -4  -1  -5 1053.85   32.62
   4   1   6   71.18    4.59
  -4   1  -6   52.99    4.80
   4  -1   6   64.39    7.92
  -4  -1  -6   67.79    5.93
   4   1   7  123.13    6.09
  -4   1  -7  135.43    6.24
   4  -1   7  123.58    6.74
  -4  -1  -7  111.62    5.28
   4   1   8    6.57    4.15
  -4   1  -8    3.98    4.17
   4  -1   8   11.01    4.77
  -4  -1  -8    4.26    3.57
   4   1   9   39.89    7.33
  -4   1  -9   27.42    4.95
   4  -1   9   29.57    5.66
  -4  -1  -9   27.54    4.29
   4   1  10   15.95    4.92
  -4   1 -10   -2.62    4.73
   4  -1  10   -1.09    8.25
  -4  -1 -10   11.57    6.08
   4   1  11  408.87   16.20
  -4   1 -11  417.28   15.58
   4  -1  11  401.17   16.61
  -4  -1 -11  405.28   14.55
   4   1  12   48.68    7.18
  -4   1 -12   54.74    9.43
   4  -1  12   62.00    7.64
  -4  -1 -12   62.22    5.99
   4   1  13  212.56   11.65
  -4   1 -13  211.40   11.14
   4  -1  13  217.79   12.66
  -4  -1 -13  206.74   10.22
   4   1  14   38.53    7.91
  -4   1 -14   40.28    7.13
   4  -1  14   39.37    8.68
  -4  -1 -14   42.98    6.52
   4   1  15  248.26   14.25
  -4   1 -15  220.68   12.55
   4  -1  15  214.72   14.96
  -4  -1 -15  229.50   12.12
   4   1  16   10.36    8.11
  -4   1 -16    5.64    6.90
   4  -1  16   17.94    8.24
  -4  -1 -16    3.01    6.88
   4   1  17  152.66   12.44
  -4   1 -17  166.26   16.14
   4  -1  17  145.77   13.82
  -4  -1 -17  174.86   11.32
   4   1  18   24.23   13.84
  -4   1 -18    3.63    7.51
   4  -1  18   10.88    9.24
  -4  -1 -18    1.12   10.79
   4   1  19   23.59   15.44
  -4   1 -19    7.99    8.22
   4  -1  19   -0.70   10.15
  -4  -1 -19   19.08    7.69
   4   1  20   22.47   11.02
  -4   1 -20    4.64   13.77
   4  -1  20   19.44   16.53
  -4  -1 -20   18.18    8.59
   4   1  21   48.05   13.13
  -4   1 -21   49.11   10.14
   4  -1  21   52.17   19.63
  -4  -1 -21   50.21   10.31
   4   1  22   33.73   12.80
  -4   1 -22   33.18   10.24
   4  -1  22   30.36   13.22
  -4  -1 -22   22.95   15.78
   4   1  23   69.37   14.79
  -4   1 -23   47.34   11.84
   4  -1  23   46.17   15.28
  -4  -1 -23   63.43   11.46
   4   1  24    8.29   20.66
  -4   1 -24   -1.15   15.71
   4  -1  24    1.87   14.19
  -4  -1 -24    9.82   10.22
   4   1  25   83.88   28.06
  -4   1 -25   81.87   13.92
   4  -1  25   84.00   18.88
  -4  -1 -25   86.70   13.69
   4   2 -28   53.36   14.64
  -4   2  28   50.25   13.12
   4  -2 -28   50.84   11.41
  -4  -2  28   75.44   13.25
   4   2 -27    4.28    7.88
  -4   2  27   -5.61   10.62
   4  -2 -27   14.98    9.16
  -4  -2  27   21.64   16.63
   4   2 -26   44.47    8.31
  -4   2  26   42.99   16.14
   4  -2 -26   34.16   13.94
  -4  -2  26   38.07   16.37
   4   2 -25   56.58    8.51
  -4   2  25   62.90   11.15
   4  -2 -25   62.21   14.02
  -4  -2  25   64.71   10.87
   4   2 -24   18.26    9.81
  -4   2  24   11.66    8.83
   4  -2 -24   11.75   11.42
  -4  -2  24   15.95    8.70
   4   2 -23   98.39   11.88
  -4   2  23   93.25   10.63
   4  -2 -23  119.48   13.50
  -4  -2  23   94.26   10.39
   4   2 -22   -1.88    5.16
  -4   2  22    8.37    7.43
   4  -2 -22    0.90    9.63
  -4  -2  22    4.98   11.11
   4   2 -21   88.64    6.89
  -4   2  21  122.40   14.06
   4  -2 -21   91.22   12.17
  -4  -2  21   94.70   12.62
   4   2 -20   79.64    6.26
  -4   2  20   63.92    8.00
   4  -2 -20   67.62   10.56
  -4  -2  20   72.44    7.44
   4   2 -19   58.22    5.30
  -4   2  19   54.93    7.08
   4  -2 -19   55.92    9.54
  -4  -2  19   48.99    6.48
   4   2 -18    1.82    3.82
  -4   2  18    0.50    5.17
   4  -2 -18    0.17    7.30
  -4  -2  18   -0.79    4.97
   4   2 -17   14.39    5.58
  -4   2  17   15.06    5.06
   4  -2 -17    2.33    4.72
  -4  -2  17   15.62    4.62
   4   2 -16  296.08   11.98
  -4   2  16  306.90   11.95
   4  -2 -16  341.24   11.98
  -4  -2  16  307.31   14.45
   4   2 -15  115.80    6.72
  -4   2  15  111.06    6.38
   4  -2 -15  114.56    6.21
  -4  -2  15  118.05    7.93
   4   2 -14  322.69    8.96
  -4   2  14  327.00   10.91
   4  -2 -14  319.70   10.77
  -4  -2  14  313.16   12.27
   4   2 -13  497.19   12.93
  -4   2  13  495.53   18.61
   4  -2 -13  504.97   15.44
  -4  -2  13  518.05   14.58
   4   2 -12   35.48    2.48
  -4   2  12   32.39    3.79
   4  -2 -12   39.08    3.69
  -4  -2  12   29.94    2.98
   4   2 -11  596.36   15.44
  -4   2  11  618.26   17.30
   4  -2 -11  591.66   19.35
  -4  -2  11  584.00   14.91
   4   2 -10  271.91    6.58
  -4   2  10  290.22    8.07
   4  -2 -10  275.81    7.88
  -4  -2  10  265.90    6.33
   4   2  -9  589.83   12.00
  -4   2   9  587.54   15.63
   4  -2  -9  582.26   15.82
  -4  -2   9  592.89   14.22
   4   2  -8  954.39   22.33
  -4   2   8  982.17   28.43
   4  -2  -8 1033.25   32.29
  -4  -2   8  947.26   23.93
   4   2  -7   16.72    5.05
   4   2  -7   10.99    1.22
  -4   2   7   16.17    2.48
   4  -2  -7   10.16    3.84
  -4  -2   7   13.34    1.50
   4   2  -6  434.24   15.57
   4   2  -6  431.73    6.14
  -4   2   6  427.00   10.33
   4  -2  -6  448.01   10.68
   4   2  -5   12.66    5.04
  -4   2   5   15.47    2.29
   4  -2  -5   18.97    2.45
   4   2  -4   64.61    5.29
  -4   2   4   59.68    3.00
   4  -2  -4   58.21    3.07
  -4  -2   4   55.08    5.44
   4   2  -3  104.42    6.56
  -4   2   3   93.51    4.78
   4  -2  -3   91.75    3.77
  -4  -2   3   94.58    8.75
   4  -2  -3  101.59    3.23
   4   2  -2  110.17    7.03
  -4   2   2  102.93    3.73
   4   2  -2   98.82    2.11
  -4  -2   2   96.63    6.56
   4  -2  -2  107.62    3.15
  -4  -2   2  107.25    1.52
   4   2  -1   19.00    5.00
  -4   2   1   16.20    2.70
   4   2  -1   20.16    1.79
  -4  -2   1   25.34    4.99
   4  -2  -1   19.55    1.92
  -4  -2   1   18.39    1.41
   4   2   0  405.88   15.36
   4   2   0  403.52    7.74
  -4   2   0  385.46    8.07
   4  -2   0  402.57    8.81
  -4  -2   0  379.00   14.34
  -4  -2   0  399.86    7.26
   4   2   1  354.10   13.88
   4   2   1  369.69    8.94
  -4   2  -1  355.19   13.72
  -4   2  -1  343.88    9.34
  -4  -2  -1  351.62    7.97
  -4  -2  -1  367.28   14.10
   4   2   2  765.90   19.11
  -4   2  -2  798.21   22.80
  -4   2  -2  809.21   24.61
  -4  -2  -2  739.26   28.50
  -4  -2  -2  760.07   20.07
   4   2   3   91.16    3.65
  -4  -2  -3   96.21   11.39
  -4  -2  -3   89.62    4.64
   4   2   4 1246.15   40.42
  -4   2  -4 1255.15   45.75
  -4  -2  -4 1255.42   54.32
  -4  -2  -4 1268.67   42.15
   4  -2   4 1312.83   49.67
   4   2   5  321.98    9.37
  -4   2  -5  353.91   11.68
  -4  -2  -5  323.97   15.17
  -4  -2  -5  330.01   10.72
   4  -2   5  347.88   12.86
   4   2   6  295.50    9.14
  -4   2  -6  302.34   10.69
   4  -2   6  305.93   11.73
  -4  -2  -6  281.07    8.22
   4   2   7  194.76    7.42
  -4   2  -7  219.22   11.81
   4  -2   7  213.91    9.85
  -4  -2  -7  193.93    6.58
   4   2   8   57.66    4.97
  -4   2  -8   61.17    5.69
   4  -2   8   69.13    9.18
  -4  -2  -8   54.89    4.31
   4   2   9  170.54    7.63
  -4   2  -9  176.24    8.35
   4  -2   9  162.17    9.70
  -4  -2  -9  161.89    7.09
   4   2  10  188.36    8.78
  -4   2 -10  178.84   13.13
   4  -2  10  192.49   10.70
  -4  -2 -10  184.86    7.91
   4   2  11  151.03   11.99
  -4   2 -11  148.30    8.94
   4  -2  11  147.15   10.58
  -4  -2 -11  162.92    7.82
   4   2  12  168.94   13.66
  -4   2 -12  173.65   13.90
   4  -2  12  143.47   15.78
  -4  -2 -12  158.42   11.62
   4   2  13   74.81    7.82
  -4   2 -13   67.94    7.32
   4  -2  13   71.25   12.72
  -4  -2 -13   79.77    6.79
   4   2  14  105.87    9.60
  -4   2 -14  120.82    9.10
   4  -2  14  116.27   15.01
  -4  -2 -14  107.91    8.05
   4   2  15   59.06    8.47
  -4   2 -15   41.69    7.94
   4  -2  15   56.19    9.49
  -4  -2 -15   67.49    7.19
   4   2  16   23.83    8.42
  -4   2 -16   28.55    7.82
   4  -2  16   41.02    9.08
  -4  -2 -16   28.81    7.11
   4   2  17   21.40   13.10
  -4   2 -17    3.16   11.82
   4  -2  17    8.62    9.30
  -4  -2 -17   23.78   10.77
   4   2  18    9.29   14.34
  -4   2 -18   13.28    8.01
   4  -2  18    9.14    9.70
  -4  -2 -18    9.42   11.27
   4   2  19    2.52   10.35
  -4   2 -19   10.82    8.62
   4  -2  19    7.54   10.31
  -4  -2 -19   19.94    8.22
   4   2  20    6.21   10.20
  -4   2 -20    9.47   13.45
   4  -2  20    9.95   16.82
  -4  -2 -20    6.80    8.37
   4   2  21   19.60   11.24
  -4   2 -21   19.60    9.50
   4  -2  21   34.02   19.05
  -4  -2 -21   19.32    9.29
   4   2  22    5.89   12.04
  -4   2 -22   17.05    9.72
   4  -2  22    8.88   19.82
  -4  -2 -22   -2.96    9.33
   4   2  23    5.17   20.25
  -4   2 -23   24.02   16.28
   4  -2  23   38.64   22.11
  -4  -2 -23   26.29   16.27
   4   2  24   69.35   17.03
  -4   2 -24   84.27   13.55
   4  -2  24   71.90   17.35
  -4  -2 -24   80.47   13.21
   4   2  25    8.09   14.75
  -4   2 -25   -3.63   11.02
   4  -2  25   31.78   15.63
  -4  -2 -25   10.71   11.01
   4   3 -28    6.82    8.36
  -4   3  28   14.62   17.82
   4  -3 -28   -3.19   15.37
  -4  -3  28    4.45   11.53
   4   3 -27   21.52   12.34
  -4   3  27   24.19   11.54
   4  -3 -27   19.56    9.86
  -4  -3  27   21.58   11.56
   4   3 -26    5.45   11.04
  -4   3  26    9.75   10.48
   4  -3 -26   14.07    9.00
  -4  -3  26   11.21   15.93
   4   3 -25   16.47    7.07
  -4   3  25   10.98    9.62
   4  -3 -25   13.56    8.58
  -4  -3  25   18.30   14.33
   4   3 -24   99.99    8.96
  -4   3  24  137.62   13.02
   4  -3 -24  118.58   11.02
  -4  -3  24  103.96   17.59
   4   3 -23   10.45    5.79
  -4   3  23    5.23   13.27
   4  -3 -23   -6.59    7.58
  -4  -3  23    2.31    7.82
   4   3 -22  164.30   12.78
  -4   3  22  163.17   12.43
   4  -3 -22  142.39   11.31
  -4  -3  22  160.74   11.79
   4   3 -21    5.42    5.18
  -4   3  21   20.10    7.07
   4  -3 -21   10.64    6.64
  -4  -3  21    6.01    6.72
   4   3 -20   73.14    6.13
  -4   3  20   73.69    8.38
   4  -3 -20   83.51    7.76
  -4  -3  20   68.17    7.93
   4   3 -19    0.59    4.26
  -4   3  19    5.70    6.29
   4  -3 -19   16.13    8.73
  -4  -3  19    5.36    5.68
   4   3 -18   33.65    6.31
  -4   3  18   32.16    6.33
   4  -3 -18   26.26    8.81
  -4  -3  18   28.68    5.72
   4   3 -17   -1.11    5.29
  -4   3  17    2.14    5.10
   4  -3 -17    2.32    4.96
  -4  -3  17    5.59    4.73
   4   3 -16    3.81    3.16
  -4   3  16    4.35    4.72
   4  -3 -16    5.49    4.72
  -4  -3  16    4.78    4.33
   4   3 -15   74.61    4.01
  -4   3  15   74.44    5.87
   4  -3 -15   53.77    5.57
  -4  -3  15   71.58    5.14
   4   3 -14  263.18    7.53
  -4   3  14  260.08    9.98
   4  -3 -14  273.03   10.07
  -4  -3  14  260.92    8.87
   4   3 -13   23.25    3.74
  -4   3  13   17.36    4.03
   4  -3 -13   16.45    4.05
  -4  -3  13   18.32    3.24
   4   3 -12  161.04    5.77
  -4   3  12  159.06    6.52
   4  -3 -12  164.42    6.77
  -4  -3  12  157.75    7.16
   4   3 -11    2.31    1.76
  -4   3  11   -3.70    3.53
   4  -3 -11    2.02    5.35
  -4  -3  11    4.97    2.36
   4   3 -10  357.38    7.35
  -4   3  10  371.98   10.71
   4  -3 -10  339.75   10.47
  -4  -3  10  354.83    9.76
   4   3  -9   29.64    1.58
  -4   3   9   33.27    3.45
   4  -3  -9   30.15    3.55
  -4  -3   9   29.87    2.93
   4   3  -8  576.52   21.90
   4   3  -8  597.13   11.83
  -4   3   8  587.33   16.42
   4  -3  -8  585.77   19.10
  -4  -3   8  602.91   12.79
   4   3  -7    1.51    5.20
   4   3  -7    1.75    1.08
  -4   3   7    4.76    2.69
   4  -3  -7    0.70    2.93
   4   3  -6    0.99    5.10
   4   3  -6    0.38    0.78
   4   3  -6    0.37    0.65
  -4   3   6    2.22    2.70
   4  -3  -6   -1.40    2.81
   4   3  -5    8.61    5.10
  -4   3   5    3.47    3.96
   4  -3  -5    2.14    2.65
   4   3  -4   61.42    6.42
  -4   3   4   58.85    3.56
   4  -3  -4   61.03    3.77
  -4  -3   4   61.27    8.59
   4   3  -3   16.64    5.58
  -4   3   3   19.00    2.93
   4   3  -3   17.52    0.79
  -4  -3   3   16.58    5.11
   4  -3  -3   15.81    4.78
   4   3  -2  411.99   20.36
  -4   3   2  420.30   10.92
   4   3  -2  408.02    6.92
  -4  -3   2  399.66   15.56
   4  -3  -2  406.64    8.07
  -4  -3   2  418.78    6.92
   4   3  -1   83.51    7.18
   4   3  -1   79.61    1.96
  -4   3   1   83.13    6.04
  -4  -3   1   90.97    6.63
  -4  -3   1   84.03    2.45
   4   3   0 1122.55   46.88
   4   3   0 1115.89   28.45
  -4   3   0 1147.86   36.79
  -4  -3   0 1133.18   53.17
  -4  -3   0 1151.91   28.55
   4   3   1   44.66    6.97
   4   3   1   50.73    3.10
  -4   3  -1   47.23    2.00
  -4  -3  -1   54.55    6.70
  -4  -3  -1   54.51    2.12
   4   3   2  125.30    4.99
  -4   3  -2  112.32    3.03
  -4   3  -2  126.87    9.74
  -4  -3  -2  113.78    8.41
  -4  -3  -2  119.29    3.40
   4   3   3  373.96    9.11
  -4   3  -3  344.35   12.88
  -4  -3  -3  337.05   16.21
  -4  -3  -3  348.83    9.64
   4   3   4   57.81    3.33
  -4   3  -4   47.21    5.50
  -4  -3  -4   64.58    8.07
  -4  -3  -4   48.18    3.09
   4   3   5   30.31    3.43
  -4   3  -5   18.04    7.74
  -4  -3  -5   30.76   11.58
  -4  -3  -5   27.47    3.01
   4   3   6   64.53    4.30
  -4   3  -6   55.96    8.90
  -4  -3  -6   73.15    9.17
  -4  -3  -6   72.99    3.89
   4  -3   6   73.95    7.11
   4   3   7   -2.34    5.50
  -4   3  -7    6.80    5.08
   4  -3   7   15.66    8.34
  -4  -3  -7    3.70    3.16
   4   3   8  962.02   33.01
  -4   3  -8  910.69   35.07
   4  -3   8  921.10   39.70
  -4  -3  -8  937.72   30.33
   4   3   9   -1.19    4.22
  -4   3  -9    5.05    5.04
   4  -3   9   -4.39    6.44
  -4  -3  -9    3.24    3.73
   4   3  10  337.18   12.95
  -4   3 -10  341.05   14.28
   4  -3  10  327.49   16.04
  -4  -3 -10  323.26   11.42
   4   3  11    6.64    5.11
  -4   3 -11   10.29    5.68
   4  -3  11    0.03    6.71
  -4  -3 -11   -0.93    4.50
   4   3  12  234.22   15.53
  -4   3 -12  235.47   17.06
   4  -3  12  231.19   14.08
  -4  -3 -12  241.58   10.51
   4   3  13   54.72    7.65
  -4   3 -13   51.76    7.75
   4  -3  13   52.33    9.22
  -4  -3 -13   65.44    6.30
   4   3  14   43.46    7.51
  -4   3 -14   38.55   11.53
   4  -3  14   46.21   14.28
  -4  -3 -14   42.11    6.56
   4   3  15    7.75    7.28
  -4   3 -15    8.44    7.03
   4  -3  15   21.36   13.51
  -4  -3 -15    8.43    6.20
   4   3  16   89.76   10.36
  -4   3 -16   99.68   10.00
   4  -3  16   88.75   17.96
  -4  -3 -16  107.21    9.02
   4   3  17   56.10   15.04
  -4   3 -17   68.03    9.52
   4  -3  17   59.62   11.79
  -4  -3 -17   50.39   12.47
   4   3  18   92.60   11.74
  -4   3 -18   79.12   10.76
   4  -3  18   81.06   13.33
  -4  -3 -18   90.84   13.96
   4   3  19    2.15    9.61
  -4   3 -19    4.07   13.02
   4  -3  19   -0.29   10.45
  -4  -3 -19    1.67    7.62
   4   3  20  105.82   13.98
  -4   3 -20   89.23   12.25
   4  -3  20   71.21   15.13
  -4  -3 -20   98.76   10.88
   4   3  21    7.97   16.76
  -4   3 -21    2.75    9.42
   4  -3  21  -10.20   18.22
  -4  -3 -21    0.67    8.78
   4   3  22   55.08   13.49
  -4   3 -22   36.85   11.00
   4  -3  22   40.52   22.74
  -4  -3 -22   37.99   10.85
   4   3  23   -8.24   13.16
  -4   3 -23   13.82   10.66
   4  -3  23    7.00   20.84
  -4  -3 -23   -5.79   15.91
   4   3  24   15.23   13.22
  -4   3 -24   -5.04   11.02
   4  -3  24    9.62   23.99
  -4  -3 -24   -0.76   16.10
   4   4 -27    5.31    7.56
  -4   4  27   13.96   17.47
   4  -4 -27   20.37    9.89
  -4  -4  27   -1.60   11.32
   4   4 -26    3.52    7.19
  -4   4  26    4.22   10.76
   4  -4 -26   14.99    9.43
  -4  -4  26   10.75   10.53
   4   4 -25   28.17   11.33
  -4   4  25   45.95   11.34
   4  -4 -25   46.53    9.70
  -4  -4  25   32.04   10.83
   4   4 -24    3.50    6.44
  -4   4  24    7.54    9.27
   4  -4 -24    8.94    8.26
  -4  -4  24   15.49    9.19
   4   4 -23  125.66    9.25
  -4   4  23  146.77   12.97
   4  -4 -23  138.83   11.69
  -4  -4  23  124.91   12.42
   4   4 -22    4.64    5.67
  -4   4  22  -10.14   12.47
   4  -4 -22    9.87    7.04
  -4  -4  22    4.66   11.93
   4   4 -21  169.17   12.50
  -4   4  21  175.69   12.70
   4  -4 -21  166.61   11.79
  -4  -4  21  167.59   17.23
   4   4 -20    8.08    4.82
  -4   4  20   11.51   11.25
   4  -4 -20   12.65    6.74
  -4  -4  20    2.93   10.37
   4   4 -19   95.10    6.14
  -4   4  19   88.51    8.97
   4  -4 -19   95.16    8.51
  -4  -4  19   93.52   12.03
   4   4 -18   14.57    6.00
  -4   4  18   10.33    9.46
   4  -4 -18   11.88    5.78
  -4  -4  18    3.85    5.68
   4   4 -17   11.73    3.70
  -4   4  17    5.75    5.68
   4  -4 -17    9.12    8.45
  -4  -4  17    9.42    5.15
   4   4 -16   18.53    3.58
  -4   4  16   25.73    8.57
   4  -4 -16    7.53    5.43
  -4  -4  16   22.96    4.83
   4   4 -15    8.03    4.66
  -4   4  15    0.78    4.95
   4  -4 -15    8.47    4.98
  -4  -4  15    1.61    4.11
   4   4 -14   16.58    2.92
  -4   4  14   14.00    4.82
   4  -4 -14   12.38    4.76
  -4  -4  14   14.81    6.10
   4   4 -13  261.14    7.24
  -4   4  13  254.94   13.05
   4  -4 -13  280.52   13.72
  -4  -4  13  234.39    8.38
   4   4 -12   45.84    4.07
  -4   4  12   43.81    4.95
   4  -4 -12   49.77    5.15
  -4  -4  12   47.10    5.57
   4   4 -11  723.59   18.28
  -4   4  11  761.31   24.83
   4  -4 -11  745.49   28.87
  -4  -4  11  764.79   24.04
   4   4 -10    5.31    6.23
   4   4 -10    2.18    2.58
  -4   4  10   -4.39    5.64
   4  -4 -10   -0.34    3.90
   4   4  -9  427.76   18.14
   4   4  -9  441.89    9.88
  -4   4   9  435.89   16.15
   4  -4  -9  382.25   15.84
   4   4  -8   -3.03    5.94
   4   4  -8    8.90    1.95
  -4   4   8    5.01    3.39
   4  -4  -8   10.95    3.54
   4   4  -7  309.16   14.02
   4   4  -7  338.22    6.23
   4   4  -7  332.09    5.91
  -4   4   7  316.74    9.68
   4  -4  -7  329.24   10.19
   4   4  -6   -2.08    5.65
  -4   4   6    3.21    3.25
   4   4  -6    2.37    1.19
   4   4  -6    1.80    1.50
   4  -4  -6   -1.29    3.39
   4   4  -5   36.74    6.36
  -4   4   5   35.82    3.70
   4   4  -5   37.48    1.43
   4   4  -5   33.83    1.85
   4  -4  -5   39.00    5.77
   4   4  -4   27.03    6.31
  -4   4   4   25.64    5.42
   4   4  -4   24.84    0.96
  -4  -4   4   25.43    5.74
   4  -4  -4   22.82    5.72
   4   4  -3  616.86   24.91
   4   4  -3  639.08   11.65
  -4   4   3  619.16   20.84
   4  -4  -3  640.50   22.50
  -4  -4   3  615.82   23.69
  -4  -4   3  617.14   11.76
   4   4  -2  168.55    9.63
   4   4  -2  159.33    3.60
  -4   4   2  157.36    6.04
  -4  -4   2  157.56    9.29
  -4  -4   2  154.14    3.66
   4   4  -1  348.43   16.00
   4   4  -1  371.82    7.88
  -4   4   1  372.53   11.01
  -4  -4   1  368.73   15.27
  -4  -4   1  358.61    6.94
   4   4   0   -0.05    6.34
   4   4   0    5.36    2.42
  -4   4   0    7.62    3.58
  -4  -4   0    7.49    6.09
  -4  -4   0    3.28    2.36
   4   4   1 1171.47   61.13
   4   4   1 1203.19   34.02
  -4   4  -1 1192.15   41.27
  -4  -4  -1 1174.76   51.40
  -4  -4  -1 1180.81   33.26
   4   4   2   11.28    3.29
  -4   4  -2   15.06    5.21
  -4  -4  -2    1.36    6.84
  -4  -4  -2    6.80    2.04
   4   4   3  370.26    9.47
  -4   4  -3  376.13   14.08
  -4  -4  -3  361.00   17.11
  -4  -4  -3  361.48    8.85
   4   4   4   17.05    2.88
  -4   4  -4   26.83    5.55
  -4  -4  -4   18.29    7.70
  -4  -4  -4   17.74    3.97
   4   4   5  152.57    7.53
  -4   4  -5  141.38   11.96
  -4  -4  -5  144.69   12.05
  -4  -4  -5  156.99    5.40
   4   4   6   40.42    3.84
  -4   4  -6   57.59    9.39
  -4  -4  -6   39.39    8.98
  -4  -4  -6   37.80    3.73
   4   4   7  183.67    7.11
  -4   4  -7  197.80    9.82
  -4  -4  -7  212.97   14.59
  -4  -4  -7  177.48    6.68
   4   4   8   17.20    6.65
  -4   4  -8   16.91    5.57
  -4  -4  -8    4.97    8.84
  -4  -4  -8    2.90    5.57
   4   4   9  246.62   10.43
  -4   4  -9  260.36   12.15
   4  -4   9  257.52   14.42
  -4  -4  -9  268.03   12.21
   4   4  10    6.19    4.91
  -4   4 -10    0.46    6.00
   4  -4  10    4.88    7.40
  -4  -4 -10    1.62    4.30
   4   4  11  477.12   18.39
  -4   4 -11  472.78   19.93
   4  -4  11  442.92   29.38
  -4  -4 -11  427.60   15.66
   4   4  12   20.25    9.15
  -4   4 -12   34.47   10.20
   4  -4  12   14.65    8.43
  -4  -4 -12   10.48    5.22
   4   4  13   40.37    6.90
  -4   4 -13   26.13    7.54
   4  -4  13   32.47    9.44
  -4  -4 -13   25.57    5.94
   4   4  14    5.42    6.79
  -4   4 -14   19.61   11.16
   4  -4  14    8.03    9.53
  -4  -4 -14   10.76    5.71
   4   4  15    5.03    7.06
  -4   4 -15    4.30    7.55
   4  -4  15   14.39    9.88
  -4  -4 -15    2.21    6.30
   4   4  16   14.13   12.14
  -4   4 -16  -13.84   11.83
   4  -4  16   -2.64   15.88
  -4  -4 -16    4.11    9.86
   4   4  17  172.69   14.20
  -4   4 -17  194.85   13.80
   4  -4  17  195.14   24.38
  -4  -4 -17  190.25   17.59
   4   4  18    9.42    9.39
  -4   4 -18   16.76   13.52
   4  -4  18   26.84   17.34
  -4  -4 -18   16.38   11.96
   4   4  19  424.93   26.03
  -4   4 -19  415.19   25.29
   4  -4  19  392.72   28.73
  -4  -4 -19  416.03   22.67
   4   4  20   -0.22   16.64
  -4   4 -20    7.98    9.63
   4  -4  20   14.52   12.54
  -4  -4 -20   12.64    8.99
   4   4  21   62.51   13.73
  -4   4 -21   55.00   11.39
   4  -4  21   63.68   15.79
  -4  -4 -21   66.00   11.05
   4   4  22   28.92   13.08
  -4   4 -22   30.82   11.18
   4  -4  22   35.88   14.49
  -4  -4 -22   26.88   10.81
   4   4  23    0.89   12.73
  -4   4 -23   -3.78   16.46
   4  -4  23    9.32   22.31
  -4  -4 -23    2.00   10.39
   4   4  24   14.32   21.19
  -4   4 -24   -5.74   11.30
   4  -4  24   -3.26   23.61
  -4  -4 -24   -1.61   10.85
   4   5 -26    5.02    7.38
  -4   5  26   26.31   17.57
   4  -5 -26    5.31   15.35
  -4  -5  26    0.06   11.07
   4   5 -25   19.19    7.24
  -4   5  25   26.62   10.89
   4  -5 -25   14.98   15.32
  -4  -5  25   27.85   10.71
   4   5 -24   16.23   10.19
  -4   5  24   20.40   10.28
   4  -5 -24   28.51    9.67
  -4  -5  24   20.46    9.89
   4   5 -23    9.47    9.19
  -4   5  23    8.61    9.13
   4  -5 -23   -4.55    8.61
  -4  -5  23   -5.14    8.88
   4   5 -22  155.98    9.43
  -4   5  22  164.34   13.78
   4  -5 -22  159.77   12.78
  -4  -5  22  146.62   12.92
   4   5 -21    4.79    5.15
  -4   5  21   -1.05   12.06
   4  -5 -21    9.39    7.37
  -4  -5  21   11.97    7.66
   4   5 -20   67.71    8.84
  -4   5  20   68.47    9.08
   4  -5 -20   61.69    8.73
  -4  -5  20   68.25   12.67
   4   5 -19   18.15    4.73
  -4   5  19   35.54   11.32
   4  -5 -19   17.75    7.22
  -4  -5  19   24.81   10.54
   4   5 -18  127.20    9.48
  -4   5  18  130.36    9.74
   4  -5 -18  140.06   10.29
  -4  -5  18  150.78   13.77
   4   5 -17    3.01    3.91
  -4   5  17   11.92    9.73
   4  -5 -17   10.70    5.98
  -4  -5  17    6.02    5.53
   4   5 -16    4.10    3.54
  -4   5  16    1.80    5.78
   4  -5 -16    7.27    9.04
  -4  -5  16    6.78    5.14
   4   5 -15   -0.83    4.96
  -4   5  15    2.87    5.25
   4  -5 -15   -0.88    5.63
  -4  -5  15   -4.49    7.23
   4   5 -14  270.05    8.51
  -4   5  14  305.35   12.49
   4  -5 -14  311.20   12.78
  -4  -5  14  285.69   11.03
   4   5 -13   45.42    8.80
   4   5 -13   41.02    4.87
  -4   5  13   33.01    5.75
   4  -5 -13   38.48    8.73
   4   5 -12  272.94   15.16
   4   5 -12  260.84    8.81
  -4   5  12  265.74   14.11
   4  -5 -12  254.83   10.91
   4   5 -11   57.24   12.44
   4   5 -11   37.46    2.77
  -4   5  11   37.86    5.19
   4  -5 -11   36.21    5.41
   4   5 -10  622.98   27.40
   4   5 -10  617.67   15.08
  -4   5  10  611.60   20.57
   4  -5 -10  570.27   20.61
   4   5  -9  157.68   11.02
   4   5  -9  161.28    3.99
   4   5  -9  149.32    4.12
  -4   5   9  166.31    7.23
   4  -5  -9  154.93    7.48
   4   5  -8  504.39   27.65
   4   5  -8  480.25   10.08
   4   5  -8  509.05   12.70
  -4   5   8  518.91   19.64
   4  -5  -8  519.33   16.99
   4   5  -7   16.56    6.77
   4   5  -7   16.87    1.45
   4   5  -7   17.72    2.72
  -4   5   7   15.50    6.11
   4  -5  -7   10.55    6.26
   4   5  -6  140.74    9.81
  -4   5   6  150.36    6.42
   4   5  -6  143.66    3.02
   4   5  -6  144.27    4.52
   4  -5  -6  140.71    6.47
   4   5  -5   53.71    7.84
   4   5  -5   55.53    1.77
   4   5  -5   58.60    2.62
  -4   5   5   45.15    4.49
   4  -5  -5   52.72    4.84
  -4  -5   5   41.85    6.58
   4   5  -4   95.95    8.92
  -4   5   4  107.28    5.46
   4   5  -4   97.70    2.40
  -4  -5   4   99.52    7.79
   4  -5  -4   93.88    5.98
   4   5  -3  120.65    9.20
   4   5  -3  109.85    3.29
  -4   5   3  106.90    5.64
   4  -5  -3  102.94    6.26
  -4  -5   3  113.94    8.25
  -4  -5   3  102.98    3.69
   4   5  -2  283.06   14.26
   4   5  -2  273.87    6.41
  -4   5   2  266.61    9.00
  -4  -5   2  269.85   12.76
  -4  -5   2  252.51    5.39
   4   5  -1  240.34   13.09
   4   5  -1  237.39    6.18
  -4   5   1  220.63    8.02
  -4  -5   1  228.41   12.34
  -4  -5   1  224.23    5.17
   4   5   0  775.14   35.73
   4   5   0  813.54   21.80
  -4   5   0  795.15   26.29
  -4  -5   0  796.89   34.29
  -4  -5   0  788.49   21.62
   4   5   1   50.35    8.13
   4   5   1   46.91    3.83
  -4   5  -1   48.18    4.67
  -4  -5  -1   46.31    7.70
  -4  -5  -1   47.99    2.70
   4   5   2   36.17    2.74
  -4   5  -2   40.56    7.09
  -4  -5  -2   36.99    8.07
  -4  -5  -2   33.82    2.64
   4   5   3  280.71    9.41
  -4   5  -3  275.57   13.21
  -4   5  -3  277.79   10.28
  -4  -5  -3  258.79    8.98
  -4  -5  -3  257.26   20.68
   4   5   4  183.39    6.05
  -4   5  -4  173.04   10.42
  -4  -5  -4  183.99   12.97
  -4  -5  -4  171.63    5.82
   4   5   5   95.32    6.59
  -4   5  -5  113.05    8.12
  -4  -5  -5  106.62   10.85
  -4  -5  -5   97.62    4.66
   4   5   6   41.41    4.05
  -4   5  -6   34.54    6.52
  -4  -5  -6   17.58   14.72
  -4  -5  -6   31.61    3.69
   4   5   7   30.26    4.18
  -4   5  -7   20.25   10.45
  -4  -5  -7   23.83   10.38
  -4  -5  -7   24.44    5.70
   4   5   8  498.88   20.32
  -4   5  -8  448.82   19.65
  -4  -5  -8  483.37   36.61
  -4  -5  -8  476.44   15.26
   4   5   9   75.59    6.08
  -4   5  -9   62.57    8.23
  -4  -5  -9   67.38   13.16
  -4  -5  -9   76.88    5.48
   4   5  10  121.28    7.42
  -4   5 -10  119.18   13.73
  -4  -5 -10  121.42   14.79
  -4  -5 -10  104.64    6.83
   4   5  11   16.75    8.85
  -4   5 -11    7.48    7.07
  -4  -5 -11   15.52    4.88
   4   5  12   50.90    7.31
  -4   5 -12   50.05    8.46
  -4  -5 -12   59.40    9.17
   4   5  13   15.42    6.68
  -4   5 -13   10.10    7.57
   4  -5  13    3.95    9.55
  -4  -5 -13   12.16    8.75
   4   5  14   29.91   11.47
  -4   5 -14   22.57    8.10
   4  -5  14   22.25    9.84
  -4  -5 -14   30.64    9.64
   4   5  15   12.58    7.65
  -4   5 -15    3.27   13.07
   4  -5  15   13.54   10.66
  -4  -5 -15    4.20    9.85
   4   5  16   49.68    9.40
  -4   5 -16   38.18    9.37
   4  -5  16   45.36   12.05
  -4  -5 -16   33.56   11.53
   4   5  17   28.52    9.36
  -4   5 -17   29.74    9.53
   4  -5  17   39.78   19.09
  -4  -5 -17   34.74   12.24
   4   5  18   64.58   15.80
  -4   5 -18   70.06   11.08
   4  -5  18   50.25   21.96
  -4  -5 -18   44.41   14.40
   4   5  19   14.88   10.38
  -4   5 -19    8.12    9.87
   4  -5  19   21.20   13.32
  -4  -5 -19   18.01    8.75
   4   5  20  147.37   15.52
  -4   5 -20  128.61   14.38
   4  -5  20  104.08   18.68
  -4  -5 -20  120.70   12.89
   4   5  21   -9.85   11.29
  -4   5 -21   -2.53   10.33
   4  -5  21   10.87   14.14
  -4  -5 -21    2.67    9.19
   4   5  22  120.63   23.91
   4  -5  22   89.36   19.85
  -4  -5 -22   95.02   13.15
   4   5  23   24.30   13.49
  -4   5 -23    6.05   11.29
   4  -5  23   12.41   16.39
  -4  -5 -23   20.31   10.43
   4   6 -26   28.37    8.16
   4  -6 -26   39.55   11.95
   4   6 -25    8.20   10.73
  -4   6  25    5.50   10.84
   4  -6 -25    4.03   10.00
  -4  -6  25    2.31   17.30
   4   6 -24   11.77    6.83
  -4   6  24    0.69   10.84
   4  -6 -24   20.29    9.74
  -4  -6  24   16.17   10.84
   4   6 -23   44.51    7.30
  -4   6  23   42.30   11.55
   4  -6 -23   44.09   10.60
  -4  -6  23   56.46   11.48
   4   6 -22    8.38    8.95
  -4   6  22   25.27   13.69
   4  -6 -22   -6.46   13.93
  -4  -6  22    7.80    9.48
   4   6 -21  113.15    7.87
  -4   6  21  121.84   12.29
   4  -6 -21  118.82   17.22
  -4  -6  21   87.02   11.58
   4   6 -20   32.28    8.36
  -4   6  20   29.18   13.38
   4  -6 -20   32.70   12.63
  -4  -6  20   17.36    8.31
   4   6 -19   32.26    5.49
  -4   6  19   25.55    8.29
   4  -6 -19   28.68    8.24
   4   6 -18   10.15    4.68
  -4   6  18   22.70   11.25
   4  -6 -18   24.69    7.70
   4   6 -17   12.75    4.15
  -4   6  17    7.99    6.84
   4  -6 -17    9.22    7.25
   4   6 -16  100.75   12.77
   4   6 -16   97.66    5.67
  -4   6  16  103.86   12.74
   4  -6 -16  104.19    8.70
   4   6 -15    5.83    8.99
   4   6 -15    6.47    3.83
  -4   6  15    2.94    6.06
   4  -6 -15    3.66    9.73
   4   6 -14   99.20   16.63
   4   6 -14   94.44    7.00
  -4   6  14   76.75    7.66
   4  -6 -14   91.01    8.18
   4   6 -13  251.65   16.64
   4   6 -13  238.88    7.75
  -4   6  13  235.11   11.40
   4  -6 -13  255.37   11.71
   4   6 -12   -5.72    8.36
   4   6 -12    4.87    3.02
  -4   6  12    1.91    5.55
   4  -6 -12   16.43    8.57
   4   6 -11  277.59   16.14
   4   6 -11  263.22    7.23
   4   6 -11  279.46    7.88
  -4   6  11  256.49   15.25
   4  -6 -11  261.44   11.91
   4   6 -10   -2.55    7.39
   4   6 -10   -1.75    2.22
   4   6 -10    2.34    2.47
  -4   6  10    5.84    4.92
   4  -6 -10    0.06    7.82
   4   6  -9   68.68    9.16
   4   6  -9   64.30    3.95
   4   6  -9   62.66    3.28
  -4   6   9   67.66    6.04
   4  -6  -9   61.08    6.33
   4   6  -8  383.90   25.60
   4   6  -8  380.67    9.67
   4   6  -8  350.06   10.86
  -4   6   8  395.34   13.60
   4  -6  -8  380.64   18.06
   4   6  -7   -6.77    7.03
  -4   6   7   -7.53    6.73
   4   6  -7   -0.63    1.71
   4   6  -7    0.46    2.39
   4  -6  -7   -4.22    4.60
   4   6  -6  112.34    9.91
  -4   6   6  104.00    6.33
   4   6  -6  104.50    4.03
   4   6  -6  102.66    3.97
   4  -6  -6   87.07    6.81
   4   6  -5   94.16    9.91
  -4   6   5   92.45    6.01
   4   6  -5  101.27    2.99
  -4  -6   5   98.15    8.60
   4  -6  -5   96.10    9.17
  -4   6   4   11.71    4.33
   4   6  -4    5.23    2.57
   4  -6  -4    1.52    3.74
  -4  -6   4    8.94    6.44
   4  -6  -4   12.73    4.81
   4   6  -3  442.05   27.41
   4   6  -3  410.69   10.19
  -4   6   3  401.17   13.81
   4  -6  -3  376.43    8.95
   4  -6  -3  421.05   15.24
  -4  -6   3  451.32   18.75
  -4  -6   3  401.53    9.56
   4   6  -2   72.96    2.84
  -4   6   2   81.50    8.21
  -4  -6   2   60.26    8.32
  -4  -6   2   69.03    3.04
   4   6  -1  164.21   12.22
   4   6  -1  172.02    4.70
  -4   6   1  173.02    7.52
  -4  -6   1  197.63   17.02
  -4  -6   1  162.76    6.15
   4   6   0  246.33   15.27
   4   6   0  246.28    7.93
  -4   6   0  249.32    9.90
  -4  -6   0  296.52   21.12
  -4  -6   0  250.72    6.72
   4   6   1  704.09   34.53
   4   6   1  717.39   19.64
  -4   6  -1  735.11   25.41
  -4  -6  -1  716.63   34.05
  -4  -6  -1  727.94   20.05
   4   6   2  628.30   17.08
  -4   6  -2  624.01   27.09
  -4  -6  -2  581.80   28.57
  -4  -6  -2  582.66   16.54
   4   6   3   30.34    5.02
  -4   6  -3   25.25    7.31
  -4   6  -3   17.40    5.62
  -4  -6  -3   31.57    3.39
  -4  -6  -3   37.37    8.90
   4   6   4   52.83    3.95
  -4   6  -4   52.75    1.99
  -4   6  -4   57.93    6.05
  -4   6  -4   62.51   11.75
  -4  -6  -4   66.28   10.23
  -4  -6  -4   52.16    5.69
   4   6   5   46.70    6.08
  -4   6  -5   35.05   11.64
  -4   6  -5   36.30    2.99
  -4  -6  -5   34.08    3.93
  -4  -6  -5   26.69   10.05
   4   6   6   78.38    5.20
  -4   6  -6   71.12    8.53
  -4  -6  -6   71.96   11.89
  -4  -6  -6   77.97    7.05
   4   6   7    5.11    6.29
  -4   6  -7   -0.05    7.09
  -4  -6  -7    6.27    9.94
  -4  -6  -7   10.18    3.93
   4   6   8   -2.03    4.49
  -4   6  -8    5.83   10.09
  -4  -6  -8  -13.35   10.71
  -4  -6  -8   -2.73    4.09
   4   6   9   24.72    5.46
  -4   6  -9   24.96    7.69
  -4  -6  -9   31.68   11.82
  -4  -6  -9   34.24    7.34
   4   6  10   28.73    8.59
  -4   6 -10   39.10    7.93
  -4  -6 -10   19.67   19.35
  -4  -6 -10   34.44    5.20
   4   6  11   37.11    6.46
  -4   6 -11   53.82   12.41
  -4  -6 -11   36.74   14.07
  -4  -6 -11   36.97    5.88
   4   6  12    3.09    6.25
  -4   6 -12    6.98    7.89
  -4  -6 -12    0.36   12.99
  -4  -6 -12    1.39    5.45
   4   6  13   12.99   10.34
  -4   6 -13   19.23    8.13
  -4  -6 -13   14.72    6.00
   4   6  14  149.98   11.16
  -4   6 -14  139.26   12.83
  -4  -6 -14  137.77   10.09
   4   6  15   -6.93    7.85
  -4   6 -15   12.37    8.48
  -4  -6 -15    7.46    6.79
   4   6  16  106.29   11.47
  -4   6 -16  112.55   12.63
  -4  -6 -16  116.79   14.96
   4   6  17   44.37   11.22
  -4   6 -17   69.54   10.77
  -4  -6 -17   53.93   13.46
   4   6  18   27.13    9.92
  -4   6 -18   15.10   10.45
  -4  -6 -18   31.27   13.31
   4   6  19   92.30   13.30
  -4   6 -19  109.39   13.07
  -4  -6 -19   70.02   11.20
   4   6  20    8.66   17.37
  -4   6 -20   10.17   10.69
   4  -6  20   21.65   14.65
  -4  -6 -20   12.09    9.55
   4   6  21   55.10   13.32
  -4   6 -21   48.35   18.86
   4  -6  21   40.20   16.51
  -4  -6 -21   39.96   11.48
   4   6  22   14.11   13.93
  -4   6 -22   22.56   12.39
   4  -6  22   17.28   17.23
  -4  -6 -22   46.39   11.13
   4   7 -24   22.41   11.21
  -4   7  24   16.75   12.10
   4  -7 -24   26.98   11.39
   4   7 -23   -0.99    6.43
  -4   7  23   26.74   15.80
   4  -7 -23   -3.49   10.02
   4   7 -22   51.24    7.54
  -4   7  22   89.98   11.91
   4  -7 -22   65.64   11.43
   4   7 -21   17.96   13.60
   4   7 -21    8.73    8.81
  -4   7  21   13.12   14.36
   4  -7 -21    6.05    9.19
   4   7 -20   14.81   12.50
   4   7 -20   11.12    5.81
  -4   7  20   16.60    8.73
   4  -7 -20   13.21    9.23
   4   7 -19  102.13   15.68
   4   7 -19   96.52   10.59
  -4   7  19  112.87   11.05
   4  -7 -19  103.53   16.51
   4   7 -18   17.70   11.45
   4   7 -18    5.66    4.70
  -4   7  18    4.02    7.92
   4  -7 -18    9.15    7.73
   4   7 -17   42.52   18.80
   4   7 -17   44.41    8.19
  -4   7  17   40.19    8.60
   4  -7 -17   45.50    8.66
   4   7 -16    4.50   10.52
   4   7 -16    4.47    4.42
  -4   7  16   -2.08    7.10
   4  -7 -16   -7.81    7.10
   4   7 -15   35.18   11.19
   4   7 -15   36.31    4.64
  -4   7  15   28.66   11.25
   4  -7 -15   33.37    7.69
   4   7 -14  133.92   19.91
   4   7 -14  116.03    8.46
  -4   7  14  122.20    9.92
   4  -7 -14  140.67   14.65
   4   7 -13  105.66   13.06
   4   7 -13  118.00    5.51
   4   7 -13  115.67    5.57
  -4   7  13  116.59   13.22
   4  -7 -13  119.24    9.54
   4   7 -12   23.34    8.97
   4   7 -12   16.47    3.22
   4   7 -12    8.74    3.72
  -4   7  12    9.79    6.19
   4  -7 -12   19.36    6.47
   4   7 -11    4.62    9.07
   4   7 -11   13.66    2.85
   4   7 -11    7.76    3.53
  -4   7  11   19.44    5.77
   4  -7 -11   15.76    6.43
   4   7 -10   58.68   10.14
   4   7 -10   60.88    3.37
   4   7 -10   61.46    4.21
  -4   7  10   62.03    6.76
   4  -7 -10   55.26    7.00
   4   7  -9  262.42   16.35
  -4   7   9  242.34   11.20
   4   7  -9  235.39    6.48
   4   7  -9  251.52    9.83
   4  -7  -9  270.80   16.02
   4   7  -8   11.04   13.16
  -4   7   8   11.59    5.32
   4   7  -8    6.45    2.36
   4   7  -8   13.92    5.08
   4  -7  -8   14.30    5.55
   4   7  -7  170.67   13.25
  -4   7   7  164.34    8.53
   4   7  -7  175.39    5.00
   4   7  -7  177.95    6.41
   4  -7  -7  173.11   13.28
   4   7  -6   59.72    9.92
  -4   7   6   57.12    6.27
   4   7  -6   50.79    4.37
   4   7  -6   55.27    6.16
   4  -7  -6   53.92    6.61
   4   7  -5  548.48   14.78
   4   7  -5  540.40   27.28
  -4   7   5  496.67   18.71
   4  -7  -5  481.90   15.18
  -4  -7   5  512.77   23.47
   4  -7  -5  478.43   20.02
  -4   7   4   13.69    8.25
   4   7  -4   26.93    3.63
   4  -7  -4   27.66    9.00
   4  -7  -4   23.04    4.28
   4   7  -3   22.00    8.76
  -4   7   3   31.71    5.40
   4   7  -3   30.73    3.78
   4  -7  -3   31.35    5.85
   4  -7  -3   28.13    2.66
   4   7  -2  104.04   12.03
   4   7  -2  117.42    5.57
  -4   7   2  121.04    7.32
  -4  -7   2  138.99   10.43
  -4  -7   2  122.01    4.67
   4   7  -1   38.01    9.71
   4   7  -1   49.06    3.21
  -4   7   1   57.67    5.90
  -4  -7   1   49.49    8.81
  -4  -7   1   47.46    3.47
   4   7   0  134.19   13.22
   4   7   0  159.95    5.37
  -4   7   0  160.76    8.28
  -4  -7   0  161.57   12.33
  -4  -7   0  139.14    7.06
   4   7   1   23.53    4.74
  -4   7  -1   24.22    5.23
  -4  -7  -1   21.47    8.64
  -4  -7  -1   16.75    4.92
   4   7   2   16.75    3.32
  -4   7  -2   15.61    5.73
  -4  -7  -2   -6.79   14.52
  -4  -7  -2   22.92    5.24
   4   7   3  569.05   17.41
  -4   7  -3  564.04   21.22
  -4  -7  -3  553.00   29.97
  -4  -7  -3  563.66   17.55
   4   7   4   -6.97    5.43
  -4   7  -4  -22.16    8.49
  -4   7  -4   -6.97    5.59
  -4  -7  -4    1.41    3.58
  -4  -7  -4    0.07    9.33
   4   7   5  231.07    8.58
  -4   7  -5  229.43    5.78
  -4   7  -5  277.55   16.23
  -4   7  -5  222.78   14.27
  -4  -7  -5  221.49   25.00
  -4  -7  -5  217.89   11.06
   4   7   6   20.71    4.34
  -4   7  -6   15.98    3.52
  -4   7  -6   21.49    6.19
  -4   7  -6    4.84    7.79
  -4  -7  -6    5.90   10.82
  -4  -7  -6   15.90    4.29
   4   7   7   20.90    4.95
  -4   7  -7   33.52   12.68
  -4   7  -7   23.22    4.50
  -4  -7  -7   29.99    7.09
  -4  -7  -7   22.21   17.31
   4   7   8   32.24    5.33
  -4   7  -8   37.76    8.75
  -4   7  -8   28.99    5.43
  -4  -7  -8   27.18    5.07
  -4  -7  -8   20.67   12.24
   4   7   9   13.10    8.39
  -4   7  -9   13.08    7.81
  -4  -7  -9   24.63   18.31
   4   7  10   12.69    6.08
  -4   7 -10   14.78   12.95
  -4  -7 -10   17.38   13.00
  -4  -7 -10   19.23    8.42
   4   7  11   81.66    8.15
  -4   7 -11   81.74   10.16
  -4  -7 -11   72.65   16.36
  -4  -7 -11   70.64    7.40
   4   7  12    2.69    6.71
  -4   7 -12    6.80    8.07
  -4  -7 -12  -24.34   21.16
  -4  -7 -12    3.69    5.94
   4   7  13  135.70   11.32
  -4   7 -13  172.59   13.93
  -4  -7 -13  157.25   21.88
  -4  -7 -13  153.30   10.42
   4   7  14    8.72    7.67
  -4   7 -14   -2.99    8.97
  -4  -7 -14   26.63   16.44
  -4  -7 -14   21.09    7.03
   4   7  15  115.66   17.27
  -4   7 -15  118.74   12.50
  -4  -7 -15  100.16   21.03
  -4  -7 -15   97.65   10.43
   4   7  16    0.08    9.19
  -4   7 -16    7.84    9.60
  -4  -7 -16   38.87   17.53
  -4  -7 -16   12.16    7.71
   4   7  17   92.94   12.82
  -4   7 -17  100.44   13.17
  -4  -7 -17   94.67   16.32
   4   7  18   33.22   16.44
  -4   7 -18   31.54   10.98
  -4  -7 -18   12.79   14.36
   4   7  19    3.02   11.05
  -4   7 -19   14.94   10.78
  -4  -7 -19   -0.97   13.63
   4   7  20   -2.73   11.17
  -4   7 -20    0.71   10.96
  -4  -7 -20    2.15   14.99
   4   7  21   31.93   13.06
  -4   7 -21   25.68   12.67
  -4  -7 -21   37.30   11.21
   4   8 -23    3.84    6.86
  -4   8  23   14.67   11.25
   4  -8 -23    9.70   10.98
   4   8 -22    1.38    6.56
  -4   8  22   -5.00   10.71
   4  -8 -22   -3.85   10.10
   4   8 -21   16.76   14.49
   4   8 -21    1.17    6.30
  -4   8  21   19.38   10.21
   4  -8 -21    0.76   10.21
   4   8 -20   39.65   15.24
   4   8 -20   39.79   10.14
  -4   8  20   37.67   10.91
   4  -8 -20   48.85   10.73
   4   8 -19   22.35   13.38
   4   8 -19   18.74    5.88
  -4   8  19   18.59   14.43
   4  -8 -19   16.64    9.96
   4   8 -18  104.50   16.26
   4   8 -18   96.77   10.99
  -4   8  18  109.22   11.84
   4  -8 -18  102.48   11.97
   4   8 -17   26.22   18.47
   4   8 -17    3.96    5.13
  -4   8  17    5.49   12.85
   4  -8 -17   19.17   13.34
   4   8 -16  249.29   21.24
   4   8 -16  241.22   10.44
   4   8 -16  261.88   11.07
  -4   8  16  251.62   15.65
   4  -8 -16  240.55   16.20
   4   8 -15   16.24   10.67
   4   8 -15    0.46    6.53
   4   8 -15   -0.66    7.03
  -4   8  15   18.01   11.29
   4  -8 -15   -2.97    7.61
   4   8 -14   35.79   17.88
   4   8 -14   25.45    4.42
   4   8 -14   31.50    7.11
  -4   8  14   29.71    7.97
   4  -8 -14   33.80    8.21
   4   8 -13    3.25   10.17
   4   8 -13    4.16    3.48
   4   8 -13   -2.66    4.16
  -4   8  13    9.03    6.98
   4  -8 -13   12.37   10.99
   4   8 -12   45.39   15.91
   4   8 -12   20.47    5.32
   4   8 -12   29.41    4.59
  -4   8  12   14.93    7.43
   4  -8 -12   23.26    7.66
   4   8 -11  101.41   13.55
   4   8 -11  112.93    7.02
   4   8 -11  114.16    6.17
  -4   8  11  129.43    9.33
   4  -8 -11  108.47    9.68
   4   8 -10   26.61   14.89
  -4   8  10   22.26    6.54
   4   8 -10   19.41    3.22
   4   8 -10   16.63    3.98
   4  -8 -10   13.86    6.77
   4   8  -9   22.22    9.60
  -4   8   9   10.49    5.99
   4   8  -9   11.50    2.93
   4   8  -9   12.25    3.94
   4  -8  -9   16.01    6.64
   4   8  -8  147.95   20.37
  -4   8   8  145.12   13.29
   4   8  -8  146.18    5.26
   4   8  -8  140.75    9.06
   4  -8  -8  145.13    9.73
   4   8  -7    3.25    6.50
   4   8  -7   33.69   10.01
  -4   8   7   11.25    6.01
   4  -8  -7   18.26    6.66
   4  -8  -7   10.32    7.84
   4   8  -6  297.51    8.44
   4   8  -6  306.74   19.36
  -4   8   6  317.84   13.53
   4   8  -6  292.83   11.27
   4  -8  -6  270.86   11.04
   4  -8  -6  320.93   14.71
  -4   8   5   13.10    9.44
   4  -8  -5   32.75    6.06
   4  -8  -5   24.61    7.06
   4   8  -4  143.40   13.25
  -4   8   4  122.27    8.45
   4   8  -4  122.92    6.40
   4  -8  -4  128.83    4.85
  -4  -8   4  131.13   11.32
   4  -8  -4  148.69    9.43
   4   8  -3   18.00    9.01
  -4   8   3   -1.96    5.37
   4   8  -3    3.17    4.36
  -4  -8   3    5.42    7.64
   4  -8  -3    2.65    1.78
   4   8  -2   95.65   11.76
   4   8  -2   84.15    4.27
  -4   8   2   92.66   10.44
  -4  -8   2   89.39   10.13
  -4  -8   2   80.88    4.77
   4   8  -1   -6.97   15.40
   4   8  -1    8.94    3.15
  -4   8   1   15.68    5.50
  -4  -8   1   11.91    8.35
  -4  -8   1    3.34    5.34
   4   8   0   43.77   10.94
   4   8   0   48.94    5.79
  -4   8   0   44.17    6.43
  -4  -8   0   50.24   14.43
  -4  -8   0   38.15    6.21
   4   8   1    3.88    3.37
  -4   8  -1    3.67    5.42
  -4  -8  -1  -13.60    8.78
  -4  -8  -1    1.93    5.39
   4   8   2  228.70    8.11
  -4   8  -2  219.33   10.70
  -4  -8  -2  208.21   16.00
  -4  -8  -2  185.59    7.75
   4   8   3   -6.46    5.76
  -4   8  -3   -5.90    8.89
  -4  -8  -3    5.97    9.55
  -4  -8  -3    5.81    3.87
   4   8   4  107.30    6.28
  -4   8  -4  123.89   12.40
  -4   8  -4  111.18    8.53
  -4  -8  -4   96.58    6.22
  -4  -8  -4  128.47   14.30
   4   8   5   29.04    6.86
  -4   8  -5    5.24    8.79
  -4   8  -5   25.10   10.32
  -4  -8  -5   14.36    4.55
  -4  -8  -5   23.75   11.00
   4   8   6  229.69    9.46
  -4   8  -6  202.22    5.31
  -4   8  -6  223.17   21.05
  -4   8  -6  215.39   12.46
  -4  -8  -6  206.23    9.27
  -4  -8  -6  235.01   26.80
   4   8   7    1.97    5.01
  -4   8  -7    3.95    4.17
  -4   8  -7   -1.37   10.09
  -4   8  -7   -5.43    9.00
  -4  -8  -7    4.23   11.56
  -4  -8  -7    0.12    4.97
   4   8   8   16.75    5.39
  -4   8  -8   10.15    5.57
  -4   8  -8   10.35    6.96
  -4   8  -8    6.74    8.92
  -4  -8  -8    7.07   12.68
  -4  -8  -8   11.73    5.16
   4   8   9    5.17    5.74
  -4   8  -9   23.05   13.77
  -4   8  -9   10.67    6.09
  -4   8  -9    6.34    7.30
  -4  -8  -9   15.71   13.43
   4   8  10   70.84   11.69
  -4   8 -10   80.11   11.32
  -4   8 -10   70.32    6.05
  -4  -8 -10   70.99    7.57
  -4  -8 -10   83.86   16.41
   4   8  11   28.80    7.31
  -4   8 -11   27.81   10.08
  -4   8 -11   23.15    8.13
  -4  -8 -11   34.91   10.03
  -4  -8 -11   29.88   23.47
   4   8  12   65.73    8.60
  -4   8 -12   70.55   11.50
  -4   8 -12   66.46    7.08
  -4  -8 -12   50.70    7.90
  -4  -8 -12   71.41   18.16
   4   8  13    3.78   11.69
  -4   8 -13   -0.84    9.64
  -4  -8 -13   -6.66   15.88
  -4  -8 -13   10.13    6.78
   4   8  14  203.73   14.56
  -4   8 -14  216.02   24.56
  -4  -8 -14  174.71   26.08
  -4  -8 -14  203.15   12.98
   4   8  15    3.04    8.45
  -4   8 -15    7.85    9.82
  -4  -8 -15   34.50   27.04
  -4  -8 -15    5.74    7.99
  -4   8 -16  125.86   21.52
  -4  -8 -16  132.64   36.66
  -4  -8 -16  107.56   11.46
   4   8  17    8.45   10.29
  -4   8 -17   13.05   10.92
  -4  -8 -17    3.92   20.01
  -4  -8 -17   20.62   13.54
   4   8  18   27.72   11.60
  -4   8 -18   14.85   17.90
  -4  -8 -18   28.68   22.35
  -4  -8 -18   41.92   15.49
   4   8  19   31.31   18.27
  -4   8 -19    7.77   11.58
  -4  -8 -19   33.16   22.83
  -4  -8 -19   23.70   15.33
   4   8  20    1.45   11.97
  -4   8 -20    8.22   18.04
  -4  -8 -20   16.32   21.49
  -4  -8 -20   -6.27   15.49
   4   9 -22   33.12   26.27
   4   9 -22   23.48    7.64
  -4   9  22   30.46   18.70
   4  -9 -22   48.83   18.76
   4   9 -21    1.61   15.04
   4   9 -21    7.81   10.09
  -4   9  21    5.34   10.83
   4  -9 -21   -4.85   16.68
   4   9 -20   25.04   15.30
   4   9 -20   10.99    6.72
   4   9 -20   17.13    6.64
  -4   9  20   29.85   10.75
   4  -9 -20    9.00   10.94
   4   9 -19   21.49   15.12
   4   9 -19   28.43    9.99
   4   9 -19   34.11   10.13
  -4   9  19   17.88   10.42
   4  -9 -19   17.27   10.71
   4   9 -18   17.11   14.40
   4   9 -18   24.43    6.14
   4   9 -18   32.09    6.42
  -4   9  18   18.90   10.51
   4  -9 -18   41.91   10.76
   4   9 -17   94.91   24.98
   4   9 -17   88.82    7.27
   4   9 -17   92.16    7.70
  -4   9  17   98.46   11.86
   4  -9 -17   81.96   12.68
   4   9 -16   10.59   13.22
   4   9 -16   18.05    7.48
   4   9 -16   14.58    8.52
  -4   9  16   -3.92    9.04
   4  -9 -16   33.80   14.18
   4   9 -15   82.98   15.13
   4   9 -15   73.12    6.21
   4   9 -15   92.88    6.95
  -4   9  15   93.72   10.84
   4  -9 -15   86.86   11.38
   4   9 -14   16.87   18.24
   4   9 -14    6.53    6.48
   4   9 -14   10.56    5.14
  -4   9  14   13.45    8.18
   4  -9 -14   17.11    8.46
   4   9 -13  150.36   16.87
   4   9 -13  145.93    9.41
   4   9 -13  152.55    8.46
  -4   9  13  141.23   11.53
   4  -9 -13  145.71   12.61
   4   9 -12   82.40   19.96
  -4   9  12   72.59    9.53
   4   9 -12   65.27    5.01
   4   9 -12   67.95    8.88
   4  -9 -12   51.91   14.52
   4   9 -11   -5.87   10.83
  -4   9  11    6.54    7.09
   4   9 -11    3.76    5.61
   4   9 -11    6.85    7.31
   4  -9 -11   -7.48    7.66
   4   9 -10   32.65    6.03
   4   9 -10   42.97   17.90
  -4   9  10   46.31    7.85
   4   9 -10   36.82    8.00
   4  -9 -10   40.98    8.73
   4  -9 -10   26.73    8.21
   4   9  -9   50.03    4.10
   4   9  -9   59.02   12.04
  -4   9   9   44.24    7.87
   4   9  -9   41.27    8.27
   4  -9  -9   34.01   12.38
   4  -9  -9   43.33    8.31
   4   9  -8    8.29    3.37
   4   9  -8   22.09   16.77
  -4   9   8    2.22   10.34
   4   9  -8    6.79    4.75
   4  -9  -8    5.86    9.90
   4  -9  -8   11.23    7.32
   4   9  -7  114.54    7.29
   4   9  -7  118.47   14.15
  -4   9   7  127.88    9.13
   4   9  -7  109.49    7.52
   4  -9  -7  113.86   11.73
   4  -9  -7  130.86   10.70
   4   9  -6    0.81    5.08
  -4   9   6   -7.07   10.02
   4   9  -6   -0.39    5.00
   4  -9  -6    1.64    4.50
   4  -9  -6    4.68    7.40
   4   9  -5  258.93   27.62
  -4   9   5  265.63   13.72
   4   9  -5  253.96    8.37
   4  -9  -5  256.10   14.30
   4  -9  -5  249.44   11.73
   4   9  -4    8.29   10.70
  -4   9   4   19.04    6.36
   4   9  -4   10.63    3.54
   4  -9  -4    7.10    3.01
  -4  -9   4    7.57    8.61
   4  -9  -4    7.02    7.66
   4   9  -3   47.25   12.87
  -4   9   3   49.42    7.18
   4   9  -3   47.48    6.01
  -4  -9   3   52.08    9.97
   4  -9  -3   48.05    3.52
   4   9  -2   70.98   18.53
   4   9  -2   45.25    6.25
  -4   9   2   54.86    7.16
  -4  -9   2   46.76   16.32
   4   9  -1   33.20   11.73
   4   9  -1   36.26    4.23
  -4   9   1   47.02   10.48
  -4  -9   1   44.14   10.22
  -4  -9   1   46.97    7.23
   4   9   0   46.23    6.71
  -4   9   0   29.39    7.12
  -4  -9   0   49.86   10.63
  -4  -9   0   47.74    7.17
   4   9   1   17.53    4.20
  -4   9  -1   19.75    9.88
  -4  -9  -1   18.93   10.14
  -4  -9  -1   15.31    6.89
  -4   9  -2   -9.70    6.22
  -4  -9  -2  -25.37   15.29
  -4  -9  -2   -2.46    4.39
   4   9   3  291.84   11.11
  -4   9  -3  283.56   13.94
  -4  -9  -3  303.85   21.73
  -4  -9  -3  273.58   11.41
   4   9   4    1.44    4.76
  -4   9  -4  -14.92   10.04
  -4   9  -4   -9.69    6.73
  -4  -9  -4   -0.29    7.41
  -4  -9  -4    2.34   17.33
   4   9   5  301.55   12.64
  -4   9  -5  308.82   21.32
  -4   9  -5  332.64   21.71
  -4  -9  -5  318.12   13.05
  -4  -9  -5  301.16   24.48
   4   9   6   -2.61    8.08
  -4   9  -6  -28.02   15.79
  -4   9  -6   -5.73    7.16
  -4  -9  -6   -6.07    8.20
  -4  -9  -6    0.91   12.17
   4   9   7   73.29    7.27
  -4   9  -7   69.02    4.79
  -4   9  -7   87.85   12.46
  -4   9  -7   95.79   14.07
  -4  -9  -7   85.64    7.53
  -4  -9  -7   93.99   15.09
   4   9   8   10.24    9.08
  -4   9  -8    6.07    3.29
  -4   9  -8    0.24    7.66
  -4   9  -8    4.95    9.68
  -4  -9  -8   12.85   20.32
  -4  -9  -8    8.01    8.94
   4   9   9   10.26    6.23
  -4   9  -9    1.52    5.97
  -4   9  -9   -7.19    7.63
  -4   9  -9    7.08   10.05
  -4  -9  -9   13.19   13.76
  -4  -9  -9    0.06    5.86
   4   9  10    9.63    6.64
  -4   9 -10    2.20    4.73
  -4   9 -10    6.27    8.19
  -4   9 -10    1.66    9.69
  -4  -9 -10   13.42   14.40
  -4  -9 -10    2.91    6.55
   4   9  11   36.25   12.59
  -4   9 -11   38.13    6.19
  -4   9 -11   56.31    9.75
  -4   9 -11   54.70   17.19
  -4  -9 -11   57.20   17.50
  -4  -9 -11   56.34   11.80
   4   9  12   19.58    8.02
  -4   9 -12   20.89    6.30
  -4   9 -12   12.51    9.16
  -4   9 -12   20.87   10.79
  -4  -9 -12   18.41   16.65
  -4  -9 -12   19.87    7.57
   4   9  13   51.08    9.50
  -4   9 -13   78.30   17.94
  -4   9 -13   57.15   11.95
  -4  -9 -13   49.64    9.03
  -4  -9 -13   76.11   19.41
   4   9  14   13.28   12.98
  -4   9 -14    0.08   10.64
  -4   9 -14    0.15    7.19
  -4  -9 -14   11.58    7.88
  -4  -9 -14  -13.86   26.76
   4   9  15   72.75   11.61
  -4   9 -15   80.62   19.95
  -4   9 -15   71.93   14.17
  -4  -9 -15   83.76   10.85
  -4  -9 -15   93.14   22.91
   4   9  16   16.99   10.29
  -4   9 -16   23.83   12.04
  -4  -9 -16   26.89   20.68
  -4  -9 -16   19.44    9.34
   4   9  17   68.32   19.21
  -4   9 -17   53.38   13.27
  -4  -9 -17   50.44   24.11
  -4  -9 -17   62.16   16.60
   4   9  18   11.21   11.20
  -4   9 -18   -5.39   11.95
  -4  -9 -18    4.07   21.55
  -4  -9 -18    7.97   15.72
   4  10 -20    2.43   15.80
   4  10 -20    0.31   10.16
   4  10 -20    1.78   10.44
  -4  10  20   19.21   17.47
   4 -10 -20   18.40   18.11
   4  10 -19   12.35   15.48
   4  10 -19    7.68    6.11
   4  10 -19    8.99    6.78
  -4  10  19   25.65   11.39
   4 -10 -19   19.76   16.85
   4  10 -18   27.55   24.09
   4  10 -18   30.26    6.64
   4  10 -18   34.04   10.71
  -4  10  18   42.56   11.14
   4 -10 -18   28.87   11.86
   4  10 -17    1.00   22.24
   4  10 -17    6.07    8.41
   4  10 -17    5.57    9.38
  -4  10  17    6.73    9.84
   4 -10 -17    3.45   10.24
   4  10 -16  120.52   18.35
   4  10 -16  101.15    7.69
   4  10 -16  106.68    8.74
  -4  10  16  114.93   12.92
   4 -10 -16  118.45   13.99
   4  10 -15    7.33   13.39
   4  10 -15    2.34    7.45
   4  10 -15   16.40    9.08
  -4  10  15    4.85    9.19
   4 -10 -15   25.78   14.44
   4  10 -14   40.90   22.81
  -4  10  14   48.76   10.61
   4  10 -14   41.85    5.67
   4  10 -14   60.27    9.81
   4 -10 -14   47.11   10.68
   4  10 -13   31.20    7.42
   4  10 -13   24.25   13.80
  -4  10  13   27.99    9.25
   4  10 -13   20.55    5.95
   4 -10 -13   33.80   11.69
   4 -10 -13   19.31    9.67
   4  10 -12    8.94    4.55
   4  10 -12   24.93   19.45
  -4  10  12    6.96    8.24
   4  10 -12    9.51    5.76
   4 -10 -12   18.92   15.37
   4 -10 -12   19.70    8.76
   4  10 -11  162.21    7.95
   4  10 -11  174.27   19.14
  -4  10  11  186.39   13.58
   4  10 -11  178.74    9.69
   4 -10 -11  162.20   14.64
   4 -10 -11  186.54   20.86
   4  10 -10   22.54    6.56
   4  10 -10   46.94   18.63
  -4  10  10    2.48    8.41
   4  10 -10   23.24    5.92
   4 -10 -10   24.23   13.38
   4 -10 -10   14.49    8.84
   4  10  -9    6.64    3.89
   4  10  -9    4.49   11.69
  -4  10   9    0.93    7.78
   4  10  -9    1.30    5.66
   4 -10  -9    1.42   11.43
   4 -10  -9    6.98    8.25
   4  10  -8   46.23    4.66
   4  10  -8   72.80   20.23
  -4  10   8   66.91    8.67
   4  10  -8   50.76    6.92
   4 -10  -8   48.89   11.96
   4 -10  -8   55.67    9.99
   4  10  -7   -5.99   11.45
   4  10  -7    4.13    6.09
  -4  10   7   10.97    7.38
   4  10  -7  -11.72    6.12
   4 -10  -7    1.70    8.81
   4 -10  -7   23.06    8.50
   4  10  -6  152.51   24.14
   4  10  -6  138.12    9.41
  -4  10   6  128.91   10.67
   4  10  -6  154.69    6.75
   4 -10  -6  128.81    7.94
   4 -10  -6  153.08   17.95
  -4  10   5    4.53    7.42
   4  10  -5   10.66    6.19
   4 -10  -5   12.80    8.06
   4 -10  -5   12.17    5.96
   4  10  -4   12.08   11.43
  -4  10   4   24.16    7.27
   4  10  -4   13.01    6.20
  -4 -10   4    8.76    9.34
   4 -10  -4    9.80    3.00
   4  10  -3   20.51   18.18
   4  10  -3   15.34    4.14
  -4  10   3   12.87    6.93
  -4 -10   3   23.85   14.59
   4  10  -2   30.33   12.34
   4  10  -2   25.03    6.67
  -4  10   2   15.91    7.34
  -4 -10   2   22.94   10.31
   4  10  -1   39.24    4.82
  -4  10   1   34.53    7.87
  -4 -10   1   47.98   10.88
  -4 -10   1   29.57    5.61
   4  10   0    0.61    6.73
  -4  10   0    8.21   10.70
  -4 -10   0  -11.40   16.01
  -4 -10   0    1.81    4.98
   4  10   1  197.46    9.03
  -4  10  -1  199.59   12.50
  -4 -10  -1  159.91   17.50
  -4 -10  -1  197.63   13.56
   4  10   2   61.63    8.74
  -4  10  -2   31.12   13.10
  -4 -10  -2   36.68   12.93
  -4 -10  -2   57.66    6.29
   4  10   3   96.54    7.09
  -4  10  -3   89.33    9.51
  -4 -10  -3   68.74   14.67
  -4 -10  -3   88.47    7.57
   4  10   4   29.25    8.78
  -4  10  -4   29.95   12.14
  -4  10  -4   33.33    8.07
  -4 -10  -4   29.29    8.78
  -4 -10  -4   28.27   13.32
   4  10   5   25.20    6.03
  -4  10  -5   19.43   11.75
  -4  10  -5   16.08    8.21
  -4 -10  -5   31.77    6.16
  -4 -10  -5   51.42   20.06
   4  10   6   81.29   10.84
  -4  10  -6   74.36   13.59
  -4  10  -6   71.83    9.36
  -4 -10  -6   69.58   11.19
  -4 -10  -6   62.54   16.28
   4  10   7    6.44    6.29
  -4  10  -7    4.69   10.90
  -4  10  -7   18.91   11.87
  -4 -10  -7    5.65    6.62
  -4 -10  -7    3.14   20.76
   4  10   8   11.38    6.91
  -4  10  -8   16.20    2.45
  -4  10  -8   40.67   16.38
  -4  10  -8   24.12    8.50
  -4 -10  -8   24.20   10.62
  -4 -10  -8   12.48   14.97
   4  10   9   19.54   11.11
  -4  10  -9   19.73    5.51
  -4  10  -9   28.95   11.40
  -4  10  -9   17.10    8.87
  -4 -10  -9   16.06    7.31
  -4 -10  -9   17.10   15.50
   4  10  10    7.48    7.27
  -4  10 -10   17.47   10.74
  -4  10 -10   -0.43    9.24
  -4 -10 -10   11.91    7.36
  -4 -10 -10    0.14   23.49
   4  10  11   32.37    8.53
  -4  10 -11   41.88   12.64
  -4  10 -11   40.60   10.20
  -4 -10 -11   45.46   12.68
  -4 -10 -11   35.10   17.90
   4  10  12   10.34    8.60
  -4  10 -12    9.83   11.58
  -4  10 -12   12.75    9.63
  -4 -10 -12   14.01    8.18
  -4 -10 -12   27.92   17.42
   4  10  13   16.06    9.28
  -4  10 -13   11.74   11.82
  -4  10 -13   37.30   15.25
  -4 -10 -13    4.01    8.77
  -4 -10 -13   18.41   27.63
   4  10  14   24.68   10.31
  -4  10 -14   33.00   12.49
  -4  10 -14   34.55   10.93
  -4 -10 -14   24.61    9.50
  -4 -10 -14   41.83   20.63
   4  10  15   19.86    9.81
  -4  10 -15   11.38   19.21
  -4  10 -15   11.53   10.59
  -4 -10 -15    8.65    9.49
  -4 -10 -15   20.68   20.30
   4  10  16    4.83   10.71
  -4  10 -16   -4.07   12.11
  -4  10 -16   15.02   10.68
  -4 -10 -16   22.22   10.14
  -4 -10 -16   45.51   21.43
   4  10  17   20.63   11.46
  -4  10 -17   28.93   19.73
  -4 -10 -17    8.28   22.60
  -4 -10 -17   24.73   16.23
   4  11 -17   17.67    6.02
   4  11 -17   18.08   17.45
  -4  11  17   17.46   11.12
   4  11 -17   20.77   10.91
   4 -11 -17   19.75   16.13
   4 -11 -17   40.03   18.14
   4  11 -16   13.74    8.80
   4  11 -16   11.32   15.84
  -4  11  16   19.10   10.28
   4  11 -16   18.34   10.35
   4 -11 -16    9.43   14.96
   4 -11 -16    7.00   10.89
   4  11 -15    8.84    5.63
   4  11 -15    6.68   14.82
  -4  11  15   16.44   10.38
   4  11 -15   15.54    6.71
   4 -11 -15   17.66   21.07
   4 -11 -15   -0.85   11.21
   4  11 -14   14.60    5.75
   4  11 -14   36.97   15.74
  -4  11  14   21.15   10.39
   4  11 -14   31.12    6.96
   4 -11 -14   42.53   13.51
   4 -11 -14   27.91   11.25
   4  11 -13    0.61    4.98
   4  11 -13    5.41   14.37
  -4  11  13    3.72   14.43
   4  11 -13    1.13   10.11
   4 -11 -13   19.16   17.69
   4 -11 -13   15.80   15.12
   4  11 -12   57.65    6.20
   4  11 -12   86.33   24.14
  -4  11  12   59.93   10.73
   4  11 -12   62.17   11.73
   4 -11 -12   47.00   12.90
   4 -11 -12   53.53   11.82
   4  11 -11    2.36    4.99
   4  11 -11    6.66   13.78
  -4  11  11   12.33   13.75
   4  11 -11    9.83    6.42
   4 -11 -11   -0.71   14.81
   4 -11 -11    5.79    9.68
   4  11 -10  111.84   10.06
   4  11 -10  140.32   26.36
  -4  11  10  126.61   12.40
   4  11 -10  120.53    9.54
   4 -11 -10   94.27   18.33
   4 -11 -10  148.93   20.73
   4  11  -9   17.45   13.79
   4  11  -9   13.19    6.86
  -4  11   9   14.53   13.13
   4  11  -9   10.64    4.79
   4 -11  -9   17.76    7.73
   4 -11  -9   13.70   10.36
   4  11  -8   62.96   20.88
   4  11  -8   46.13    7.88
  -4  11   8   29.13    9.11
   4  11  -8   35.80    7.78
   4 -11  -8   32.85   11.56
   4 -11  -8   34.36   10.15
   4  11  -7    2.35   13.10
   4  11  -7   10.54    6.89
  -4  11   7    8.71   12.25
   4  11  -7    6.35    4.82
   4 -11  -7   14.52    9.41
   4 -11  -7    7.87    9.39
   4  11  -6   19.22   19.64
   4  11  -6   -0.83    7.37
  -4  11   6   12.24    7.83
   4  11  -6    3.00    6.90
   4 -11  -6    3.19    4.89
   4 -11  -6   13.69    9.03
   4  11  -5   14.25   13.19
   4  11  -5   13.77    4.85
  -4  11   5   20.55   12.63
   4 -11  -5    9.04    5.84
   4  11  -4   70.80   22.23
   4  11  -4   59.79    5.61
  -4  11   4   52.55    9.16
   4  11  -3   19.37   13.09
   4  11  -3    9.45    5.00
  -4  11   3    6.27    7.87
  -4 -11   3    2.30    9.93
   4  11  -2   76.54    6.38
  -4  11   2   66.24    9.57
  -4 -11   2   69.07   18.91
  -4  11   1  -10.50    7.96
  -4 -11   1  -23.87   11.53
   4  11   0  111.75    7.61
  -4  11   0  109.85   11.00
  -4 -11   0  112.46   15.51
  -4 -11   0  111.56    8.69
   4  11   1   19.20    5.54
  -4  11  -1   15.14    8.38
  -4 -11  -1   12.52   18.15
  -4 -11  -1   25.31    9.19
   4  11   2   14.13    8.60
  -4  11  -2   17.62    8.48
  -4 -11  -2    8.47   12.24
  -4 -11  -2   21.31    6.39
   4  11   3   22.71    6.13
  -4  11  -3   32.51   12.55
  -4  11  -3   15.87    8.40
  -4 -11  -3   20.96    6.53
  -4 -11  -3   41.65   19.83
   4  11   4   -3.32    9.68
  -4  11  -4   28.66   12.62
  -4  11  -4   21.69   12.54
  -4 -11  -4   22.37    9.97
  -4 -11  -4   26.67   13.21
   4  11   5   15.12    6.34
  -4  11  -5   -6.77   12.28
  -4  11  -5    0.13    8.07
  -4 -11  -5    6.56    6.42
  -4 -11  -5   21.14   13.69
   4  11   6    7.76   10.18
  -4  11  -6    4.53   18.71
  -4  11  -6   11.77   12.91
  -4 -11  -6    2.84   10.37
  -4 -11  -6   25.53   14.00
   4  11   7    2.08    7.03
  -4  11  -7   16.52   12.55
  -4  11  -7   24.40    8.81
  -4 -11  -7   20.75    7.41
  -4 -11  -7   13.84   23.66
   4  11   8   79.95    9.35
  -4  11  -8   81.64   21.92
  -4  11  -8   81.58   10.90
  -4 -11  -8   72.10   13.97
  -4 -11  -8   74.61   18.23
   4  11   9   17.35   11.69
  -4  11  -9    1.22   12.63
  -4  11  -9   19.36   13.43
  -4 -11  -9    3.87    7.84
  -4 -11  -9   21.61   24.57
   4  11  10   24.71    8.25
  -4  11 -10   25.80   18.41
  -4  11 -10    8.44    9.61
  -4 -11 -10   13.52    8.57
  -4 -11 -10   12.04   17.30
   4  11  11   14.88    8.69
  -4  11 -11   -1.43   12.57
  -4  11 -11   10.64    9.56
  -4 -11 -11   15.21   12.82
  -4 -11 -11   15.91   17.67
   4  11  12   18.54   14.90
  -4  11 -12   46.95   13.20
  -4  11 -12   17.12   10.37
  -4 -11 -12   33.80    9.10
  -4 -11 -12   -0.85   29.43
   4  11  13   -7.62    9.65
  -4  11 -13    3.79   12.30
  -4  11 -13  -10.26   15.89
  -4 -11 -13   10.49    8.94
  -4 -11 -13   19.67   18.96
   4  11  14    1.03    9.90
  -4  11 -14   13.70   12.37
  -4  11 -14    1.44   10.36
  -4 -11 -14    5.58    9.59
  -4 -11 -14   34.03   20.13
  -4  12  14   13.13   11.02
   4  12 -14   -4.19   16.23
   4 -12 -14    3.68   11.89
   4 -12 -14   23.44   20.21
   4  12 -13   58.58    6.83
   4  12 -13   48.12   18.13
  -4  12  13   37.62   18.39
   4  12 -13   55.81   13.43
   4 -12 -13   53.69   13.90
   4 -12 -13   65.90   13.33
   4  12 -12   21.90   23.73
   4  12 -12   12.73   11.21
  -4  12  12    0.56   10.62
   4  12 -12    4.23    5.69
   4 -12 -12   16.43   16.75
   4 -12 -12   18.03   17.08
   4  12 -11  117.09   21.42
  -4  12  11  150.69   14.56
   4  12 -11  129.13    8.57
   4  12 -11  146.33   11.27
   4 -12 -11  145.38   17.23
   4  12 -10   27.00   23.22
  -4  12  10    2.96    9.49
   4  12 -10    6.88    5.37
   4  12 -10   -4.89    7.51
   4 -12 -10   12.59   11.00
   4  12  -9   57.96   16.99
  -4  12   9   48.08   11.26
   4  12  -9   44.26    9.38
   4  12  -9   62.53    9.18
   4 -12  -9   70.21   19.34
   4  12  -8   31.62   21.55
  -4  12   8   11.03   14.33
   4  12  -8    2.09    5.19
   4  12  -8    3.31    7.81
   4 -12  -8    4.06   10.65
   4  12  -7   15.14   14.36
  -4  12   7    9.28    8.91
   4  12  -7    9.40    8.05
   4  12  -7    4.46   12.73
   4 -12  -7    4.51   10.50
   4  12  -6   12.44   21.45
   4  12  -6   -0.70    5.26
   4  12  -6    0.82   12.31
  -4  12   6    1.13   13.34
   4  12  -5    4.13   15.03
   4  12  -5   22.91    8.29
   4  12  -5   33.12    9.23
  -4  12   5   19.55    8.97
   4  12  -4   -7.07    5.37
  -4  12   4   -0.14   13.30
   4  12  -3   83.19   10.65
  -4  12   3   99.65   11.46
   4  12  -2    2.57    5.56
  -4  12   2   -8.97    8.61
  -4 -12   2   -5.93   11.25
   4  12  -1   58.90   10.60
  -4  12   1   74.64   10.51
  -4 -12   1   43.94   21.05
  -4  12   0   -0.49    8.75
  -4 -12   0  -19.95   12.53
   4  12   1   93.43   11.58
  -4  12  -1   92.96   15.71
  -4 -12  -1   88.41   15.37
  -4 -12  -1   61.15    8.87
   4  12   2    7.01    6.23
  -4  12  -2   11.25    8.67
  -4 -12  -2   -0.75   19.58
  -4 -12  -2   -5.78   11.23
   4  12   3   14.07    6.59
  -4  12  -3   30.92   13.96
  -4  12  -3   11.22   13.44
  -4 -12  -3    8.86    7.47
  -4 -12  -3   11.46   13.58
   4  12   4    0.80    9.99
  -4  12  -4   15.31   20.97
  -4  12  -4   -0.49    8.75
  -4 -12  -4    1.80   10.62
  -4 -12  -4   -8.05   20.59
   4  12   5   21.25    7.47
  -4  12  -5   39.45   14.29
  -4  12  -5   22.10    9.60
  -4 -12  -5   24.71    8.14
  -4 -12  -5   14.67   15.07
   4  12   6   14.96   11.35
  -4  12  -6  -15.20   19.96
  -4  12  -6   17.81   14.28
  -4 -12  -6    0.32   11.84
  -4 -12  -6   20.53   22.54
   4  12   7  104.28   10.65
  -4  12  -7  125.18   17.00
  -4  12  -7   93.28   12.57
  -4 -12  -7   94.56   10.82
  -4 -12  -7   88.85   20.79
   4  12   8    7.89    8.20
  -4  12  -8    1.59   20.37
  -4  12  -8   16.23    9.66
  -4 -12  -8   15.69   12.84
  -4 -12  -8    9.60   16.49
   4  12   9   58.74   15.08
  -4  12  -9   63.68   15.97
  -4  12  -9   61.91   17.59
  -4 -12  -9   60.22   10.20
  -4 -12  -9   57.63   20.28
   4  12  10    2.92    8.60
  -4  12 -10    5.92   20.09
  -4  12 -10    4.84    9.59
  -4 -12 -10    2.89    8.77
  -4 -12 -10   14.73   17.58
   4  12  11   35.93   10.25
  -4  12 -11   38.05   14.69
  -4  12 -11   36.24   11.04
  -4 -12 -11   36.38   15.63
  -4 -12 -11   38.80   20.15
   4  13 -10   60.08   27.97
  -4  13  10   60.32   18.04
   4  13 -10   41.91    6.83
   4  13 -10   42.03    9.58
   4 -13 -10   53.06   13.93
   4  13  -9    4.47   16.95
  -4  13   9   13.41   10.46
   4  13  -9   16.19    9.60
   4  13  -9   17.01    9.05
   4 -13  -9   33.65   12.68
   4  13  -8   25.14   16.65
  -4  13   8   11.79   10.68
   4  13  -8   17.65    6.27
   4  13  -8   20.24   14.48
   4 -13  -8   28.81   11.98
   4  13  -7    1.68   15.50
   4  13  -7    0.29    9.26
   4  13  -7    5.18   13.68
  -4  13   7    2.70   10.01
   4  13  -6    5.66   15.54
   4  13  -6    5.96    5.85
   4  13  -6    4.46    9.24
  -4  13   6   -4.14    9.94
   4  13  -5   -3.12    5.98
   4  13  -5   -1.18    9.82
  -4  13   5   16.33   14.49
   4  13  -4    6.86    9.42
  -4  13   4    7.05    9.43
   4  13  -3   -2.23    6.21
  -4  13   3   -1.50   14.31
   4  13  -2   27.22   10.27
  -4  13   2   18.50   10.59
   4  13  -1    7.96    6.47
  -4  13   1   -5.02    9.56
  -4 -13   1   11.19   12.61
   4  13   0   54.43    8.15
  -4  13   0   67.20   16.75
  -4 -13   0   65.78   23.51
   4  13   1    2.42   10.54
  -4  13  -1    3.86    9.61
  -4 -13  -1   16.35   13.98
   4  13   2   27.07    7.72
  -4  13  -2   35.93   16.72
  -4  13  -2   44.57   15.61
  -4 -13  -2   39.67    8.77
  -4 -13  -2   16.64   14.96
   4  13   3   11.93   11.35
  -4  13  -3    5.07   16.01
  -4  13  -3   15.69    9.89
  -4 -13  -3   15.72    8.68
  -4 -13  -3   24.92   14.43
   4  13   4    8.59    7.77
  -4  13  -4   10.12   15.00
  -4  13  -4   -0.72    9.76
  -4 -13  -4    7.97    8.65
  -4 -13  -4   12.89   14.99
   4  13   5    3.08    7.98
  -4  13  -5   33.53   15.23
  -4  13  -5   23.45   15.44
  -4 -13  -5   12.65    8.97
  -4 -13  -5   10.83   15.50
   4  13   6   17.45   13.48
  -4  13  -6   22.43   15.57
  -4  13  -6   40.50   10.96
  -4 -13  -6   23.03    9.47
  -4 -13  -6   36.11   26.77
   4  13   7    4.35    8.39
  -4  13  -7   -8.95   14.75
  -4  13  -7   -1.75   10.22
  -4 -13  -7   15.95    8.94
  -4 -13  -7   -0.88   16.97
   5   0 -28    8.91    8.26
  -5   0  28    5.47   16.81
   5   0 -27    2.57    7.66
  -5   0  27    7.48    9.83
   5   0 -26   10.99    7.56
  -5   0  26   29.60    9.73
   5   0 -25    2.21    6.82
  -5   0  25    7.02   13.09
   5   0 -24   48.67    7.43
  -5   0  24   41.03    9.09
   5   0 -23    9.34    6.04
  -5   0  23   15.21    7.21
   5   0 -22  225.80   11.55
  -5   0  22  274.57   18.35
   5   0 -21    3.39    5.15
  -5   0  21    9.27    6.04
   5   0 -20   42.89    5.51
  -5   0  20   44.94    6.69
   5   0 -19    6.50    4.45
  -5   0  19   -6.79    7.93
   5   0 -18  110.26    6.36
  -5   0  18  115.65    7.19
   5   0 -17   -0.36    3.71
  -5   0  17   -4.08    4.26
   5   0 -16    0.91    3.41
  -5   0  16    3.97    3.72
   5   0 -15   -0.75    4.68
  -5   0  15   -1.18    3.53
   5   0 -14 1217.09   42.30
  -5   0  14 1314.96   45.54
   5   0 -13    2.24    2.63
  -5   0  13    1.95    4.36
   5   0 -12  319.63   10.04
  -5   0  12  333.04    8.72
   5   0 -11    1.17    2.10
  -5   0  11   -1.86    2.31
   5   0 -10  966.84   26.01
  -5   0  10  957.56   25.92
   5   0  -9    2.10    1.73
  -5   0   9    1.48    1.67
   5   0  -8   24.26    2.00
  -5   0   8   27.59    2.75
   5   0  -7   -0.25    1.45
  -5   0   7    1.29    1.40
   5   0  -6   12.98    4.19
   5   0  -6   16.16    1.62
  -5   0   6   17.63    1.45
   5   0  -5    3.05    3.87
   5   0  -5    1.25    1.48
  -5   0   5    2.15    1.97
   5   0  -4    9.43    5.94
  -5   0   4    6.56    1.29
   5   0  -3   -2.03    3.89
  -5   0   3   -5.02    3.56
  -5   0   3   -0.48    2.30
   5   0  -2  481.76   15.58
  -5   0   2  495.66   14.61
  -5   0   2  483.69   11.67
   5   0  -1    2.74    5.96
  -5   0   1    4.19    5.69
  -5   0   1   -0.10    2.25
   5   0   0   57.21    5.42
   5   0   0   60.47    3.69
  -5   0   0   54.51    5.02
  -5   0   0   65.83    3.23
   5   0   1    6.44    4.44
   5   0   1    2.49    2.96
  -5   0  -1    2.65    4.16
  -5   0  -1    3.73    4.07
   5   0   2  586.65   16.77
  -5   0  -2  569.46   19.35
  -5   0  -2  553.93   15.25
   5   0   3    4.82    3.30
  -5   0  -3    6.06    4.90
  -5   0  -3   -4.91    3.04
   5   0   4 1263.59   48.98
  -5   0  -4 1244.69   57.73
  -5   0  -4 1215.21   42.00
   5   0   5    4.91    3.95
  -5   0  -5   -6.33    5.46
  -5   0  -5    0.83    5.40
   5   0   6  980.13   35.11
  -5   0  -6  972.23   32.93
   5   0   7   -0.85    4.34
  -5   0  -7    3.13    5.73
   5   0   8  306.83   12.32
  -5   0  -8  303.88   11.21
   5   0   9   -4.52    5.15
  -5   0  -9    6.02    6.84
   5   0  10  138.94    9.20
  -5   0 -10  153.76    7.85
   5   0  11   -7.72    6.19
  -5   0 -11    3.37    5.13
   5   0  12   10.71    6.93
  -5   0 -12   15.03    8.33
   5   0  13    2.45    7.22
  -5   0 -13   -0.29    5.67
   5   0  14   18.41    8.57
  -5   0 -14   29.64    6.62
   5   0  15    4.88    7.94
  -5   0 -15    2.71    9.76
   5   0  16    8.83    8.73
  -5   0 -16    3.29    6.96
   5   0  17   -0.16    9.64
  -5   0 -17   11.11    7.49
   5   0  18   87.20   13.64
  -5   0 -18  114.94   16.40
   5   0  19    7.01   10.76
  -5   0 -19    0.79    8.51
   5   0  20   60.16   12.89
  -5   0 -20   29.89   10.15
   5   0  21    6.98   12.05
  -5   0 -21    2.58    9.09
   5   0  22   27.62   13.91
  -5   0 -22   51.11   16.91
   5   0  23   -6.85   20.73
  -5   0 -23   -2.59   10.39
   5   0  24    1.38   23.68
  -5   0 -24   20.14   11.55
   5   1 -28    1.38    8.15
  -5   1  28   16.29   16.78
   5  -1 -28    5.49    8.81
  -5  -1  28   18.65   16.37
   5   1 -27   13.52   11.68
  -5   1  27   10.82    9.99
   5  -1 -27    4.10    8.13
  -5  -1  27   15.63    9.74
   5   1 -26   19.55   10.90
  -5   1  26   12.86    9.55
   5  -1 -26   10.33    7.88
  -5  -1  26    6.53    9.42
   5   1 -25   98.65    9.15
  -5   1  25  120.66   17.65
   5  -1 -25   94.20   10.05
  -5  -1  25  106.96   11.39
   5   1 -24   15.67    6.38
  -5   1  24   14.81    8.38
   5  -1 -24   14.43   11.02
  -5  -1  24   18.65   12.00
   5   1 -23  142.80    9.49
  -5   1  23  168.82   11.94
   5  -1 -23  171.45   14.68
  -5  -1  23  169.63   11.79
   5   1 -22    4.34    5.34
  -5   1  22   -3.09   10.74
   5  -1 -22   12.57    9.17
  -5  -1  22   12.39    6.70
   5   1 -21   96.14    6.97
  -5   1  21  106.57    8.93
   5  -1 -21  113.15   11.49
  -5  -1  21   92.27   12.71
   5   1 -20   35.30    5.27
  -5   1  20   33.34    6.68
   5  -1 -20   36.61    8.80
  -5  -1  20   29.12    6.36
   5   1 -19   23.07    4.57
  -5   1  19   25.46    5.73
   5  -1 -19   32.58    5.27
  -5  -1  19   24.80    5.71
   5   1 -18   15.40    3.89
  -5   1  18    6.74    5.00
   5  -1 -18   16.88    4.51
  -5  -1  18   10.49    4.82
   5   1 -17   14.54    3.65
  -5   1  17   19.45    4.66
   5  -1 -17   14.99    4.33
  -5  -1  17   13.03    6.53
   5   1 -16   63.91    4.20
  -5   1  16   72.63    5.41
   5  -1 -16   69.38    4.89
  -5  -1  16   62.08    4.77
   5   1 -15  144.14    5.30
  -5   1  15  144.42    6.51
   5  -1 -15  141.98    8.59
  -5  -1  15  159.63    6.16
   5   1 -14    5.81    3.84
  -5   1  14    6.36    4.98
   5  -1 -14    1.69    3.33
  -5  -1  14   -0.74    3.01
   5   1 -13  627.76   16.40
  -5   1  13  639.71   18.62
   5  -1 -13  630.47   18.41
  -5  -1  13  629.58   17.42
   5   1 -12    6.09    2.05
  -5   1  12    9.06    2.79
   5  -1 -12    5.78    4.18
  -5  -1  12    5.91    3.56
   5   1 -11  214.62    5.01
  -5   1  11  213.59    6.13
   5  -1 -11  209.07    6.27
  -5  -1  11  191.00    5.07
   5   1 -10   88.41    3.58
  -5   1  10   77.47    3.61
   5  -1 -10   89.02    3.67
  -5  -1  10   81.22    2.81
   5   1  -9  826.78   18.54
  -5   1   9  793.49   20.90
   5  -1  -9  811.66   21.52
  -5  -1   9  776.84   19.35
   5   1  -8  608.59   13.25
  -5   1   8  620.63   15.19
   5  -1  -8  651.01   16.01
  -5  -1   8  677.32   13.48
   5   1  -7  592.85   21.01
   5   1  -7  618.15   12.30
  -5   1   7  618.20   14.39
   5  -1  -7  594.58   14.24
  -5  -1   7  572.39   11.46
   5   1  -6  739.02   25.94
   5   1  -6  724.43   15.06
  -5   1   6  759.47   19.57
  -5  -1   6  725.46   13.81
   5   1  -5  211.03    9.24
  -5   1   5  233.61    5.33
   5  -1  -5  217.07    7.48
   5  -1  -5  225.19    5.58
  -5  -1   5  218.66    3.69
   5   1  -4    7.21    4.59
  -5   1   4    4.29    1.82
   5  -1  -4    5.58    5.02
  -5  -1   4   -1.17    4.21
  -5  -1   4    3.10    1.78
   5   1  -3  865.56   31.57
  -5   1   3  886.57   22.75
  -5  -1   3  858.91   29.88
  -5  -1   3  895.88   19.85
   5  -1  -3  880.94   30.11
  -5  -1   3  891.32   21.01
   5   1  -2  468.56   16.91
  -5   1   2  452.95   10.84
  -5   1   2  463.80   15.02
  -5  -1   2  480.19   19.59
   5  -1  -2  471.31   16.22
  -5  -1   2  497.25   10.74
  -5   1   1  197.55    9.07
   5   1  -1  244.57   13.42
   5   1  -1  210.52    6.51
  -5   1   1  205.91    8.90
   5  -1  -1  231.31    9.86
  -5  -1   1  229.73    4.81
  -5  -1   1  221.97    9.34
  -5   1   0  685.72   20.08
   5   1   0  681.83   24.81
   5   1   0  711.98   17.77
  -5   1   0  702.35   23.05
   5  -1   0  659.44   20.50
  -5  -1   0  669.63   15.87
  -5  -1   0  689.84   29.28
   5   1   1 1092.00   50.73
   5   1   1 1134.36   36.55
  -5   1  -1 1087.46   35.91
  -5   1  -1 1090.16   40.71
  -5  -1  -1 1129.10   33.86
  -5  -1  -1 1146.87   43.68
   5   1   2  187.35    8.06
  -5   1  -2  206.50    7.23
  -5   1  -2  198.53    7.66
   5  -1   2  217.55    8.09
  -5  -1  -2  210.88    5.75
  -5  -1  -2  214.30   10.08
   5   1   3    1.04    2.98
  -5   1  -3   -1.40    6.33
  -5   1  -3    3.69    3.26
   5  -1   3    3.93    3.99
  -5  -1  -3   -1.61    5.62
  -5  -1  -3    3.01    2.46
   5   1   4  225.14    9.98
  -5   1  -4  233.09    9.49
  -5   1  -4  225.29    8.42
   5  -1   4  220.72    8.91
  -5  -1  -4  240.09   11.81
  -5  -1  -4  221.08    6.94
   5   1   5  496.08   15.42
  -5   1  -5  503.68   15.88
  -5  -1  -5  506.07   21.52
  -5  -1  -5  514.10   17.13
   5  -1   5  520.80   17.69
   5   1   6  142.79    6.71
  -5   1  -6  158.28    7.10
   5  -1   6  154.57    7.74
  -5  -1  -6  147.96    6.14
   5   1   7  273.14   10.17
  -5   1  -7  269.14   10.13
   5  -1   7  290.29   11.91
  -5  -1  -7  263.09    9.27
   5   1   8    9.97    4.69
  -5   1  -8   11.10    6.96
   5  -1   8    5.11    8.28
  -5  -1  -8    6.70    3.93
   5   1   9  399.77   19.63
  -5   1  -9  425.01   15.06
   5  -1   9  365.16   16.27
  -5  -1  -9  383.08   13.32
   5   1  10  115.22   11.62
  -5   1 -10  115.23   10.70
   5  -1  10  126.72    9.04
  -5  -1 -10  108.35    6.71
   5   1  11   60.88   10.56
  -5   1 -11   49.99    6.70
   5  -1  11   60.98    7.68
  -5  -1 -11   65.76    8.80
   5   1  12   41.61   11.16
  -5   1 -12   58.95   10.19
   5  -1  12   56.58    7.90
  -5  -1 -12   44.57    6.39
   5   1  13    7.85   10.64
  -5   1 -13   10.53    6.20
   5  -1  13    4.77    7.29
  -5  -1 -13    3.99    5.79
   5   1  14   44.21    8.18
  -5   1 -14   24.03    7.31
   5  -1  14   31.75    8.75
  -5  -1 -14   29.86    7.09
   5   1  15    6.97    8.25
  -5   1 -15   10.26   10.69
   5  -1  15   24.11    9.07
  -5  -1 -15   12.88   10.12
   5   1  16   41.62    9.78
  -5   1 -16   44.15    8.05
   5  -1  16   34.72   10.53
  -5  -1 -16   33.03    7.79
   5   1  17   87.44   12.17
  -5   1 -17   98.51   10.54
   5  -1  17  115.77   13.01
  -5  -1 -17   84.99    9.56
   5   1  18   21.48    9.86
  -5   1 -18   11.43   12.31
   5  -1  18    1.68   10.20
  -5  -1 -18    1.71    8.04
   5   1  19   77.60   13.10
  -5   1 -19   80.97   10.69
   5  -1  19   86.44   13.57
  -5  -1 -19   89.51   15.33
   5   1  20   18.81   11.70
  -5   1 -20   25.49    9.56
   5  -1  20   26.56   12.70
  -5  -1 -20   19.07    9.12
   5   1  21   33.00   19.82
  -5   1 -21   33.84   15.61
   5  -1  21   20.72   13.44
  -5  -1 -21   29.80   10.02
   5   1  22   33.42   20.86
  -5   1 -22   27.99   11.04
   5  -1  22   28.34   14.04
  -5  -1 -22   16.66   10.62
   5   1  23   -5.24   13.75
  -5   1 -23   -7.21   10.17
   5  -1  23   22.15   14.30
  -5  -1 -23    2.38   16.06
   5   1  24   43.88   15.80
  -5   1 -24   36.09   18.09
   5  -1  24    2.90   15.17
  -5  -1 -24   23.63   11.48
   5   2 -28    5.35    7.90
  -5   2  28    1.41   11.04
   5  -2 -28   12.01   13.89
  -5  -2  28   13.79   11.11
   5   2 -27   64.19    9.46
  -5   2  27  105.10   18.76
   5  -2 -27   76.20   16.07
  -5  -2  27   73.79   18.22
   5   2 -26   45.07    8.17
  -5   2  26   47.05   10.96
   5  -2 -26   60.79    9.75
  -5  -2  26   60.53   11.01
   5   2 -25   21.95    6.79
  -5   2  25    2.11    9.44
   5  -2 -25   15.04    8.07
  -5  -2  25   26.19    8.91
   5   2 -24   21.01    9.57
  -5   2  24   26.89    8.58
   5  -2 -24   25.43    7.49
  -5  -2  24    6.75    8.36
   5   2 -23    3.08    8.62
  -5   2  23    6.00    7.49
   5  -2 -23    8.91    6.56
  -5  -2  23   -1.71   11.46
   5   2 -22  120.54    8.03
   5  -2 -22  134.04    9.71
  -5  -2  22  129.08   14.40
   5   2 -21   15.69    5.10
  -5   2  21   27.54    7.08
   5  -2 -21   31.87    6.40
  -5  -2  21   18.35    6.52
   5   2 -20   61.52    5.90
  -5   2  20   90.90   11.55
   5  -2 -20   86.47   10.51
  -5  -2  20   66.76    7.22
   5   2 -19   46.67    5.11
  -5   2  19   52.21    6.79
   5  -2 -19   45.50    9.13
  -5  -2  19   63.32    6.12
   5   2 -18    6.32    3.68
  -5   2  18    8.21    5.41
   5  -2 -18   14.91    4.92
  -5  -2  18   12.81    7.24
   5   2 -17   62.98    4.35
  -5   2  17   60.26    6.07
   5  -2 -17   62.26    5.74
  -5  -2  17   68.60    7.71
   5   2 -16   21.05    3.19
  -5   2  16   22.90    7.09
   5  -2 -16   14.31    4.33
  -5  -2  16   17.65    4.16
   5   2 -15    2.33    2.74
  -5   2  15    5.25    3.99
   5  -2 -15    3.94    3.95
  -5  -2  15   10.16    3.46
   5   2 -14  572.58   14.83
  -5   2  14  560.47   17.87
   5  -2 -14  543.21   17.75
  -5  -2  14  545.41   15.91
   5   2 -13    1.90    3.18
  -5   2  13    2.89    5.33
   5  -2 -13   -1.68    3.32
  -5  -2  13    6.09    2.65
   5   2 -12  203.99    4.99
  -5   2  12  217.01    6.98
   5  -2 -12  190.03    9.04
  -5  -2  12  204.89    6.99
   5   2 -11  343.78    8.21
  -5   2  11  370.80   10.15
   5  -2 -11  354.75   10.18
  -5  -2  11  327.44    9.00
   5   2 -10  234.75    4.55
  -5   2  10  230.63    6.94
   5  -2 -10  237.17    7.36
  -5  -2  10  222.95    5.86
   5   2  -9  460.28    8.86
  -5   2   9  465.00   12.03
   5  -2  -9  429.38   14.23
  -5  -2   9  427.24    9.18
   5   2  -8   87.29    7.27
   5   2  -8   86.90    2.01
  -5   2   8   86.91    3.80
   5  -2  -8   83.68    5.42
  -5  -2   8   80.14    2.31
   5   2  -7  874.11   33.96
   5   2  -7  919.82   16.91
  -5   2   7  870.50   26.54
   5  -2  -7  892.46   27.13
  -5  -2   7  799.74   15.67
   5   2  -6    9.57    5.69
  -5   2   6   17.70    2.51
   5  -2  -6   12.10    4.20
   5   2  -5  296.41   12.11
  -5   2   5  294.36    7.42
   5  -2  -5  274.78    7.60
   5   2  -4  446.83   17.16
  -5   2   4  450.55   11.18
   5  -2  -4  455.15   11.83
  -5  -2   4  440.47   19.89
   5  -2  -4  453.67   11.95
   5   2  -3  154.58    8.61
  -5   2   3  156.66    4.86
   5  -2  -3  153.95    4.94
  -5  -2   3  149.41    8.37
  -5   2   2  203.70    6.11
   5   2  -2  202.74    4.47
  -5  -2   2  207.75    9.73
   5  -2  -2  210.94    7.61
  -5  -2   2  198.06    3.69
   5   2  -1  382.50   15.81
   5   2  -1  403.59    8.11
  -5   2   1  387.19   10.93
  -5   2   1  407.23   10.79
   5  -2  -1  377.15    9.97
  -5  -2   1  415.02   15.47
  -5  -2   1  403.89    8.09
  -5   2   0  404.00   13.18
   5   2   0  365.54   16.15
   5   2   0  392.29    9.97
  -5   2   0  387.67    9.52
   5  -2   0  423.22   10.61
  -5  -2   0  398.37    8.91
  -5  -2   0  372.81   20.22
   5   2   1  479.47   19.47
   5   2   1  487.94   11.33
  -5   2  -1  475.19   15.37
  -5   2  -1  497.09   14.65
  -5  -2  -1  450.80   11.40
  -5  -2  -1  483.10   24.83
   5   2   2  417.64   10.43
  -5   2  -2  443.39   17.53
  -5   2  -2  408.02   11.51
  -5  -2  -2  408.66   11.25
  -5  -2  -2  438.73   17.85
   5   2   3  716.24   20.45
  -5   2  -3  752.02   25.74
  -5   2  -3  768.55   29.10
  -5  -2  -3  738.21   37.47
  -5  -2  -3  704.11   20.97
   5   2   4   31.58    5.08
  -5   2  -4   32.58    4.75
  -5   2  -4   31.12    4.19
  -5  -2  -4   17.47   11.32
   5  -2   4   27.12    5.36
   5   2   5  239.34   10.12
  -5   2  -5  233.47    9.62
  -5  -2  -5  250.99   13.69
  -5  -2  -5  241.10    7.21
   5  -2   5  251.81   10.93
   5   2   6  489.28   15.09
  -5   2  -6  492.86   17.01
  -5  -2  -6  462.13   22.12
  -5  -2  -6  466.24   13.80
   5  -2   6  462.56   18.41
   5   2   7  156.97    7.17
  -5   2  -7  170.98   11.28
  -5  -2  -7  161.99   12.44
  -5  -2  -7  153.09    6.37
   5  -2   7  163.56   13.15
   5   2   8  395.60   14.26
  -5   2  -8  456.52   16.19
   5  -2   8  380.36   17.26
  -5  -2  -8  403.55   16.46
   5   2   9   -3.54    4.92
  -5   2  -9   12.06    5.33
   5  -2   9    7.06    6.38
  -5  -2  -9   12.53    6.08
   5   2  10  171.24    9.14
  -5   2 -10  197.83    9.74
   5  -2  10  180.60   15.43
  -5  -2 -10  172.73    8.27
   5   2  11   97.96   11.19
  -5   2 -11   87.92    8.02
   5  -2  11   85.12    9.38
  -5  -2 -11   88.94    6.54
   5   2  12  228.62   16.15
  -5   2 -12  211.44   11.76
   5  -2  12  191.95   13.72
  -5  -2 -12  225.48   10.40
   5   2  13  205.64   17.23
  -5   2 -13  212.85   12.17
   5  -2  13  192.42   14.50
  -5  -2 -13  208.81   10.35
   5   2  14   21.36    7.81
  -5   2 -14   27.61    7.45
   5  -2  14   23.47    9.54
  -5  -2 -14   23.39    9.29
   5   2  15   89.74   10.72
  -5   2 -15  115.88   10.03
   5  -2  15  105.48   12.05
  -5  -2 -15  104.56    8.77
   5   2  16   68.12   10.39
  -5   2 -16   67.73    9.75
   5  -2  16   61.69   11.36
  -5  -2 -16   72.46    8.46
   5   2  17   27.18   10.14
  -5   2 -17   33.18   13.97
   5  -2  17   42.67   11.83
  -5  -2 -17   31.30    7.95
   5   2  18   85.02   12.50
  -5   2 -18   75.51   10.93
   5  -2  18   91.90   14.16
  -5  -2 -18   93.33   10.01
   5   2  19    1.72   15.82
  -5   2 -19   12.08    8.82
   5  -2  19   -3.62   12.04
  -5  -2 -19   18.31   12.69
   5   2  20   40.53   18.55
  -5   2 -20    1.88   15.20
   5  -2  20   36.36   12.87
  -5  -2 -20   25.27    9.32
   5   2  21   82.51   14.70
  -5   2 -21   63.65   12.15
   5  -2  21   71.70   15.48
  -5  -2 -21   69.89   11.43
   5   2  22   17.51   13.27
  -5   2 -22   27.81   10.75
   5  -2  22   21.64   14.78
  -5  -2 -22   16.33    9.86
   5   2  23   43.42   14.83
  -5   2 -23   42.88   19.23
   5  -2  23   44.09   16.15
  -5  -2 -23   29.21   11.38
   5   2  24   26.59   15.75
  -5   2 -24   17.19   12.26
   5  -2  24   28.13   16.50
  -5  -2 -24   31.82   17.70
   5   3 -28   73.59   14.05
  -5   3  28   52.58   13.76
   5  -3 -28   63.16   11.63
  -5  -3  28   78.18   13.51
   5   3 -27    7.21   11.26
  -5   3  27   13.03   11.03
   5  -3 -27   19.44    9.18
  -5  -3  27    3.80   10.30
   5   3 -26   28.53    7.45
  -5   3  26   36.30   10.63
   5  -3 -26   28.42    9.49
  -5  -3  26   21.70   15.80
   5   3 -25    0.66    6.42
  -5   3  25    6.27    9.42
   5  -3 -25    7.10    8.33
  -5  -3  25    1.41   13.25
   5   3 -24   11.24    6.12
   5  -3 -24   20.60    7.94
  -5  -3  24   14.37    8.35
   5   3 -23   14.94    5.70
  -5   3  23   21.86    8.31
   5  -3 -23   12.69    7.47
  -5  -3  23   10.85    7.79
   5   3 -22   22.17    8.09
  -5   3  22   24.32    7.70
   5  -3 -22    9.98    6.96
  -5  -3  22   17.89    7.31
   5   3 -21   69.29    8.84
  -5   3  21   81.94    9.04
   5  -3 -21   60.42    8.21
  -5  -3  21   75.45    8.47
   5   3 -20  261.07   10.72
  -5   3  20  307.40   14.92
   5  -3 -20  277.10   13.81
  -5  -3  20  287.23   13.37
   5   3 -19   12.27    4.09
  -5   3  19   11.94    5.97
   5  -3 -19   14.42    5.90
  -5  -3  19   11.19    8.48
   5   3 -18   43.52    4.12
  -5   3  18   40.75    6.42
   5  -3 -18   37.31    8.81
  -5  -3  18   40.98    8.49
   5   3 -17   27.15    3.56
  -5   3  17   24.88    5.57
   5  -3 -17   28.34    5.58
  -5  -3  17   29.12    7.20
   5   3 -16  111.17    4.66
  -5   3  16  118.80   10.04
   5  -3 -16  110.70    6.90
  -5  -3  16   95.33    8.33
   5   3 -15   30.00    3.06
  -5   3  15   35.37    4.95
   5  -3 -15   26.13    4.96
  -5  -3  15   35.86    5.80
   5   3 -14  116.75    4.10
  -5   3  14  128.82    6.48
   5  -3 -14  126.34    9.21
[truncated: 773,847 more chars]
