# Supplementary material for: Ruthenium-catalysed oxidative conversion of ammonia into dinitrogen
Source: Springer Nature journal article supplement (doi:10.1038/s41557-019-0293-y), 2019-07-24
Supplement: 41557_2019_293_MOESM28_ESM.mol [file 41557_2019_293_MOESM28_ESM.mol]

nchem.18112385C-comp7.mol
  ChemDraw05241913293D

 41 44  0  0  1  0  0  0  0  0999 V2000
   -3.3911    1.9944   -1.1988 C   0  0  0  0  0  0  0  0  0  0  0  0
   -1.5490    1.9944   -1.1988 C   0  0  0  0  0  0  0  0  0  0  0  0
   -4.3122    3.2073   -2.2351 C   0  0  0  0  0  0  0  0  0  0  0  0
   -6.1543    3.2073   -2.2351 C   0  0  0  0  0  0  0  0  0  0  0  0
   -7.0753    1.9944   -1.1988 C   0  0  0  0  0  0  0  0  0  0  0  0
   -6.1543    0.7815   -0.1626 C   0  0  0  0  0  0  0  0  0  0  0  0
   -4.3122    0.7815   -0.1626 N   0  0  0  0  0  0  0  0  0  0  0  0
   -0.6279    0.7815   -0.1626 N   0  0  0  0  0  0  0  0  0  0  0  0
    1.2142    0.7815   -0.1626 C   0  0  0  0  0  0  0  0  0  0  0  0
    2.1352    1.9944   -1.1988 C   0  0  0  0  0  0  0  0  0  0  0  0
    1.2142    3.2073   -2.2351 C   0  0  0  0  0  0  0  0  0  0  0  0
   -0.6279    3.2073   -2.2351 C   0  0  0  0  0  0  0  0  0  0  0  0
   -7.0753   -0.4314    0.8737 C   0  0  0  0  0  0  0  0  0  0  0  0
   -6.1543   -1.6444    1.9100 O   0  5  0  0  0  0  0  0  0  0  0  0
   -8.9175   -0.4314    0.8737 O   0  0  0  0  0  0  0  0  0  0  0  0
    0.7024   -2.7958    1.9100 N   0  0  0  0  0  0  0  0  0  0  0  0
   -2.4278   -0.5782    0.9991 Ru  0  1  0  0  0  0  0  0  0  0  0  0
   -3.7040    4.6027   -1.1988 C   0  0  0  0  0  0  0  0  0  0  0  0
   -3.7040    6.0764   -1.1988 C   0  0  0  0  0  0  0  0  0  0  0  0
   -2.4278    6.8132   -1.1988 C   0  0  0  0  0  0  0  0  0  0  0  0
   -1.1515    6.0764   -1.1988 C   0  0  0  0  0  0  0  0  0  0  0  0
   -1.1515    4.6027   -1.1988 C   0  0  0  0  0  0  0  0  0  0  0  0
   -2.4278    3.8658   -1.1988 N   0  0  0  0  0  0  0  0  0  0  0  0
   -3.7040   -4.6027   -1.1988 C   0  0  0  0  0  0  0  0  0  0  0  0
   -3.7040   -6.0764   -1.1988 C   0  0  0  0  0  0  0  0  0  0  0  0
   -2.4278   -6.8132   -1.1988 C   0  0  0  0  0  0  0  0  0  0  0  0
   -1.1515   -6.0764   -1.1988 C   0  0  0  0  0  0  0  0  0  0  0  0
   -1.1515   -4.6027   -1.1988 C   0  0  0  0  0  0  0  0  0  0  0  0
   -2.4278   -3.8658   -1.1988 N   0  0  0  0  0  0  0  0  0  0  0  0
    2.1352   -0.4314    0.8737 C   0  0  0  0  0  0  0  0  0  0  0  0
    3.3452   -0.2009    2.2351 O   0  0  0  0  0  0  0  0  0  0  0  0
    1.6628   -2.1240    0.3422 O   0  5  0  0  0  0  0  0  0  0  0  0
   -2.4278    8.2869   -1.1988 C   0  0  0  0  0  0  0  0  0  0  0  0
   -2.4278   -8.2869   -1.1988 C   0  0  0  0  0  0  0  0  0  0  0  0
    7.3275    3.4925   -1.1988 P   0  5  0  0  0  0  0  0  0  0  0  0
    8.9175    2.5746   -1.1988 F   0  0  0  0  0  0  0  0  0  0  0  0
    8.9175    4.4105   -1.1988 F   0  0  0  0  0  0  0  0  0  0  0  0
    7.3275    5.3284   -1.1988 F   0  0  0  0  0  0  0  0  0  0  0  0
    5.7376    4.4105   -1.1988 F   0  0  0  0  0  0  0  0  0  0  0  0
    5.7376    2.5746   -1.1988 F   0  0  0  0  0  0  0  0  0  0  0  0
    7.3275    1.6566   -1.1988 F   0  0  0  0  0  0  0  0  0  0  0  0
 30 31  2  0      
 30 32  1  0      
  9 30  1  0      
 20 33  1  0      
 26 34  1  0      
  1  2  1  0      
  1  3  2  0      
  3  4  1  0      
  4  5  2  0      
  5  6  1  1      
  6  7  2  0      
  7  1  1  1      
  2  8  2  0      
  8  9  1  1      
  9 10  2  0      
 10 11  1  0      
 11 12  2  0      
 12  2  1  0      
  6 13  1  0      
 13 14  1  0      
 13 15  2  0      
  7 17  1  0      
 17  8  1  0      
 17 16  1  1      
 17 23  1  0      
 17 29  1  0      
 18 19  2  0      
 19 20  1  0      
 20 21  2  0      
 21 22  1  0      
 22 23  2  0      
 23 18  1  0      
 24 25  2  0      
 25 26  1  0      
 26 27  2  0      
 27 28  1  0      
 28 29  2  0      
 29 24  1  0      
 35 36  1  0      
 35 37  1  0      
 35 38  1  0      
 35 39  1  0      
 35 40  1  0      
 35 41  1  0      
M  CHG  4  14  -1  17   3  32  -1  35  -1
M  STY  1   1 SUP
M  SLB  1   1   1
M  SAL   1  3  30  31  32
M  SBL   1  1   3
M  SMT   1 COO-
M  SBV   1   3   -0.9211    1.2129
M  STY  1   2 SUP
M  SLB  1   2   2
M  SAL   2  1  33
M  SBL   2  1   4
M  SMT   2 Me
M  SBV   2   4    0.0000   -1.4737
M  STY  1   3 SUP
M  SLB  1   3   3
M  SAL   3  1  34
M  SBL   3  1   5
M  SMT   3 Me
M  SBV   3   5    0.0000    1.4737
M  END
