# Supplementary material for: Ruthenium-catalysed oxidative conversion of ammonia into dinitrogen
Source: Springer Nature journal article supplement (doi:10.1038/s41557-019-0293-y), 2019-07-24
Supplement: 41557_2019_293_MOESM31_ESM.mol [file 41557_2019_293_MOESM31_ESM.mol]

nchem.18112385C-comp8.mol
  ChemDraw05241913293D

 81 86  0  0  1  0  0  0  0  0999 V2000
   -3.8325    4.8306   -1.6523 C   0  0  0  0  0  0  0  0  0  0  0  0
   -3.3888    3.5714   -0.5765 C   0  0  0  0  0  0  0  0  0  0  0  0
   -1.7326    3.2340   -0.2883 N   0  0  0  0  0  0  0  0  0  0  0  0
   -0.5202    4.1558   -1.0758 C   0  0  0  0  0  0  0  0  0  0  0  0
   -0.9640    5.4149   -2.1516 C   0  0  0  0  0  0  0  0  0  0  0  0
   -2.6201    5.7523   -2.4398 C   0  0  0  0  0  0  0  0  0  0  0  0
    1.1359    3.8184   -0.7875 C   0  0  0  0  0  0  0  0  0  0  0  0
    1.5797    2.5592    0.2883 N   0  0  0  0  0  0  0  0  0  0  0  0
    3.2358    2.2218    0.5765 C   0  0  0  0  0  0  0  0  0  0  0  0
    4.4482    3.1436   -0.2110 C   0  0  0  0  0  0  0  0  0  0  0  0
    4.0044    4.4028   -1.2868 C   0  0  0  0  0  0  0  0  0  0  0  0
    2.3483    4.7402   -1.5750 C   0  0  0  0  0  0  0  0  0  0  0  0
    3.6796    0.9627    1.6523 C   0  0  0  0  0  0  0  0  0  0  0  0
    2.4672    0.0409    2.4398 O   0  5  0  0  0  0  0  0  0  0  0  0
    5.3357    0.6253    1.9405 O   0  0  0  0  0  0  0  0  0  0  0  0
   -5.5614   -1.6374    1.9405 Ru  0  1  0  0  0  0  0  0  0  0  0  0
   -2.7901   -0.0922    1.9405 N   0  0  0  0  0  0  0  0  0  0  0  0
   -0.0363    1.6374    1.9405 Ru  0  1  0  0  0  0  0  0  0  0  0  0
   -8.6187    3.8675    1.9405 C   0  0  0  0  0  0  0  0  0  0  0  0
   -8.6187    5.2391    1.9405 C   0  0  0  0  0  0  0  0  0  0  0  0
   -7.4308    5.9250    1.9405 C   0  0  0  0  0  0  0  0  0  0  0  0
   -6.2430    5.2391    1.9405 C   0  0  0  0  0  0  0  0  0  0  0  0
   -6.2430    3.8675    1.9405 C   0  0  0  0  0  0  0  0  0  0  0  0
   -7.4308    3.1816    1.9405 N   0  0  0  0  0  0  0  0  0  0  0  0
   -1.2242    6.0560    1.9405 C   0  0  0  0  0  0  0  0  0  0  0  0
   -1.2242    7.4276    1.9405 C   0  0  0  0  0  0  0  0  0  0  0  0
   -0.0363    8.1135    1.9405 C   0  0  0  0  0  0  0  0  0  0  0  0
    1.1515    7.4276    1.9405 C   0  0  0  0  0  0  0  0  0  0  0  0
    1.1515    6.0560    1.9405 C   0  0  0  0  0  0  0  0  0  0  0  0
   -0.0363    5.3701    1.9405 N   0  0  0  0  0  0  0  0  0  0  0  0
   -6.7493   -6.0560    1.9405 C   0  0  0  0  0  0  0  0  0  0  0  0
   -6.7493   -7.4276    1.9405 C   0  0  0  0  0  0  0  0  0  0  0  0
   -5.5614   -8.1135    1.9405 C   0  0  0  0  0  0  0  0  0  0  0  0
   -4.3735   -7.4276    1.9405 C   0  0  0  0  0  0  0  0  0  0  0  0
   -4.3735   -6.0560    1.9405 C   0  0  0  0  0  0  0  0  0  0  0  0
   -5.5614   -5.3701    1.9405 N   0  0  0  0  0  0  0  0  0  0  0  0
    1.1574   -4.2878    1.9405 C   0  0  0  0  0  0  0  0  0  0  0  0
    1.1574   -5.6594    1.9405 C   0  0  0  0  0  0  0  0  0  0  0  0
    2.3453   -6.3452    1.9405 C   0  0  0  0  0  0  0  0  0  0  0  0
    3.5331   -5.6594    1.9405 C   0  0  0  0  0  0  0  0  0  0  0  0
    3.5331   -4.2878    1.9405 C   0  0  0  0  0  0  0  0  0  0  0  0
    2.3453   -3.6019    1.9405 N   0  0  0  0  0  0  0  0  0  0  0  0
   -4.1336    2.5123    1.9405 C   0  0  0  0  0  0  0  0  0  0  0  0
   -3.4147    0.9621    1.9405 O   0  0  0  0  0  0  0  0  0  0  0  0
   -5.8356    2.6648    1.9405 O   0  5  0  0  0  0  0  0  0  0  0  0
   -7.4308    7.2966    1.9405 C   0  0  0  0  0  0  0  0  0  0  0  0
   -0.0363    9.4851    1.9405 C   0  0  0  0  0  0  0  0  0  0  0  0
   -5.5614   -9.4851    1.9405 C   0  0  0  0  0  0  0  0  0  0  0  0
    2.3453   -7.7169    1.9405 C   0  0  0  0  0  0  0  0  0  0  0  0
    9.4486    2.7878    1.9405 Sb  0  5  0  0  0  0  0  0  0  0  0  0
   10.9334    1.9305    1.9405 Cl  0  0  0  0  0  0  0  0  0  0  0  0
   10.9334    3.6451    1.9405 Cl  0  0  0  0  0  0  0  0  0  0  0  0
    9.4486    4.5024    1.9405 Cl  0  0  0  0  0  0  0  0  0  0  0  0
    7.9637    3.6451    1.9405 Cl  0  0  0  0  0  0  0  0  0  0  0  0
    7.9637    1.9305    1.9405 Cl  0  0  0  0  0  0  0  0  0  0  0  0
    9.4486    1.0732    1.9405 Cl  0  0  0  0  0  0  0  0  0  0  0  0
    9.4486   -3.1662    1.9405 Sb  0  5  0  0  0  0  0  0  0  0  0  0
   10.9334   -4.0235    1.9405 Cl  0  0  0  0  0  0  0  0  0  0  0  0
   10.9334   -2.3089    1.9405 Cl  0  0  0  0  0  0  0  0  0  0  0  0
    9.4486   -1.4516    1.9405 Cl  0  0  0  0  0  0  0  0  0  0  0  0
    7.9637   -2.3089    1.9405 Cl  0  0  0  0  0  0  0  0  0  0  0  0
    7.9637   -4.0235    1.9405 Cl  0  0  0  0  0  0  0  0  0  0  0  0
    9.4486   -4.8808    1.9405 Cl  0  0  0  0  0  0  0  0  0  0  0  0
   -1.3683   -4.6718    1.9405 C   0  0  0  0  0  0  0  0  0  0  0  0
   -1.8120   -3.4126    1.9405 C   0  0  0  0  0  0  0  0  0  0  0  0
   -3.4682   -3.0752    1.9405 N   0  0  0  0  0  0  0  0  0  0  0  0
   -4.6806   -3.9970    1.9405 C   0  0  0  0  0  0  0  0  0  0  0  0
   -4.2368   -5.2562    1.9405 C   0  0  0  0  0  0  0  0  0  0  0  0
   -2.5806   -5.5936    1.9405 C   0  0  0  0  0  0  0  0  0  0  0  0
   -7.0909   -3.9176    1.9405 C   0  0  0  0  0  0  0  0  0  0  0  0
   -7.5346   -2.6584    1.9405 N   0  0  0  0  0  0  0  0  0  0  0  0
   -9.1908   -2.3211    1.9405 C   0  0  0  0  0  0  0  0  0  0  0  0
  -10.4031   -3.2428    1.9405 C   0  0  0  0  0  0  0  0  0  0  0  0
   -9.9594   -4.5020    1.9405 C   0  0  0  0  0  0  0  0  0  0  0  0
   -8.3032   -4.8394    1.9405 C   0  0  0  0  0  0  0  0  0  0  0  0
   -9.2773   -0.9627    1.9405 C   0  0  0  0  0  0  0  0  0  0  0  0
   -8.0649   -0.0409    1.9405 O   0  5  0  0  0  0  0  0  0  0  0  0
  -10.9334   -0.6253    1.9405 O   0  0  0  0  0  0  0  0  0  0  0  0
   -1.2259   -2.6909    1.9405 C   0  0  0  0  0  0  0  0  0  0  0  0
    0.1920   -2.9561    1.9405 O   0  0  0  0  0  0  0  0  0  0  0  0
   -1.9893   -1.2578    1.9405 O   0  5  0  0  0  0  0  0  0  0  0  0
 43 44  2  0      
 43 45  1  0      
  2 43  1  0      
 21 46  1  0      
 27 47  1  0      
 33 48  1  0      
 39 49  1  0      
 16 36  1  0      
  1  2  2  0      
  2  3  1  0      
  3  4  2  0      
  4  5  1  0      
  5  6  2  0      
  6  1  1  0      
  4  7  1  0      
  7  8  2  0      
  8  9  1  0      
  9 10  2  0      
 10 11  1  0      
 11 12  2  0      
 12  7  1  0      
  9 13  1  0      
 13 14  1  0      
 13 15  2  0      
  8 18  1  0      
  3 18  1  0      
 18 42  1  0      
 18 30  1  0      
 16 24  1  0      
 16 17  2  0      
 17 18  2  0      
 19 20  2  0      
 20 21  1  0      
 21 22  2  0      
 22 23  1  0      
 23 24  2  0      
 24 19  1  0      
 25 26  2  0      
 26 27  1  0      
 27 28  2  0      
 28 29  1  0      
 29 30  2  0      
 30 25  1  0      
 31 32  2  0      
 32 33  1  0      
 33 34  2  0      
 34 35  1  0      
 35 36  2  0      
 36 31  1  0      
 37 38  2  0      
 38 39  1  0      
 39 40  2  0      
 40 41  1  0      
 41 42  2  0      
 42 37  1  0      
 50 51  1  0      
 50 52  1  0      
 50 53  1  0      
 50 54  1  0      
 50 55  1  0      
 50 56  1  0      
 57 58  1  0      
 57 59  1  0      
 57 60  1  0      
 57 61  1  0      
 57 62  1  0      
 57 63  1  0      
 64 65  2  0      
 65 66  1  0      
 66 67  2  0      
 67 68  1  1      
 68 69  2  0      
 69 64  1  1      
 67 70  1  1      
 70 71  2  0      
 71 72  1  0      
 72 73  2  0      
 73 74  1  1      
 74 75  2  0      
 75 70  1  1      
 72 76  1  0      
 76 77  1  0      
 76 78  2  0      
 65 79  1  0      
 79 80  2  0      
 79 81  1  0      
M  CHG  8  14  -1  16   3  18   3  45  -1  50  -1  57  -1  77  -1  81  -1
M  STY  1   1 SUP
M  SLB  1   1   1
M  SAL   1  3  43  44  45
M  SBL   1  1   3
M  SMT   1 COO-
M  SBV   1   3    0.7449    1.0591
M  STY  1   2 SUP
M  SLB  1   2   2
M  SAL   2  1  46
M  SBL   2  1   4
M  SMT   2 Me
M  SBV   2   4    0.0000   -1.3717
M  STY  1   3 SUP
M  SLB  1   3   3
M  SAL   3  1  47
M  SBL   3  1   5
M  SMT   3 Me
M  SBV   3   5    0.0000   -1.3717
M  STY  1   4 SUP
M  SLB  1   4   4
M  SAL   4  1  48
M  SBL   4  1   6
M  SMT   4 Me
M  SBV   4   6    0.0000    1.3717
M  STY  1   5 SUP
M  SLB  1   5   5
M  SAL   5  1  49
M  SBL   5  1   7
M  SMT   5 Me
M  SBV   5   7    0.0000    1.3716
M  END
